# Supplementary material
Source: MDPI journal article supplement (https://www.mdpi.com/1424-2818/11/12/234)
Supplement: s1 [file s1]

Archive with 2 entries (2 files):
- Griffin et al. FunGuild results.xlsx
- supplementary materials.pdf
