# Supplementary material
Source: MDPI journal article supplement (https://www.mdpi.com/1424-2818/11/12/234)
Supplement: s1 [file s1 › Griffin et al. FunGuild results.xlsx]

## Sheet: Sheet1
OTU ID	sample_71	96	108	118	142	207	317	326	327	362	386	409	444	561	567	622	667	682	806	821	832	859	860	863	867	921	933	938	939	964	1042	1071	1077	1090	1091	1105	1106	1113	1114	1116	1128	1132	1139	1158	1162	1163	1169	1177	1183
Zotu1	662	5	2010	2668	246	27	29	20	13	932	13	764	11	12	24	19	18	131	24	13	11	14	1012	5	7	17	234	2380	1490	17	23	954	16	10	13	17	3	39	9	8	989	15	19	19	3	20	16	42	23
Zotu10	1	4	1368	1	288	4	6	4	6	2379	0	35	2	2	0	0	4	16	8	8	0	1	411	0	0	3	3	501	59	3	2	3	3	0	5	0	2	4	6	2	118	4	1	1	2	2	2	0	4
Zotu100	0	0	2	0	60	0	0	0	0	0	0	0	0	0	0	0	2	0	0	0	0	0	0	0	0	0	0	0	22	0	0	0	0	0	0	0	0	0	0	0	0	0	0	0	0	0	0	0	0
Zotu1000	0	0	0	0	0	0	0	0	0	0	0	0	0	0	0	0	0	0	0	0	0	0	0	0	0	0	0	0	0	0	0	0	0	0	0	0	0	0	0	0	0	0	0	0	0	0	0	0	0
Zotu1001	0	0	0	0	0	0	0	0	0	0	0	0	0	0	0	0	0	0	0	0	0	0	0	0	0	0	0	0	0	0	0	0	0	0	0	0	0	0	0	0	0	0	0	0	0	0	0	0	0
Zotu1002	0	0	0	0	0	0	0	0	0	0	0	0	0	0	0	0	0	0	0	0	0	0	0	0	0	0	0	0	0	0	0	0	0	0	0	0	0	0	0	0	0	0	0	0	0	0	0	0	0
Zotu1003	0	0	0	0	0	0	0	0	0	0	0	0	0	0	0	0	0	0	0	0	0	0	0	0	0	0	0	0	0	0	0	0	0	0	0	0	0	0	0	0	0	0	0	0	0	0	0	0	0
Zotu1004	0	0	0	0	0	0	0	0	0	0	0	0	0	0	0	0	0	0	0	0	0	0	0	0	1	0	0	0	0	0	0	0	0	0	0	0	0	0	0	0	0	0	0	0	0	0	0	0	0
Zotu1005	0	0	0	0	0	0	0	0	0	0	0	0	0	0	0	0	0	0	0	0	0	0	0	0	0	0	0	0	0	0	0	0	0	0	0	0	0	0	0	0	0	0	0	0	0	0	0	0	0
Zotu1006	0	0	0	0	0	0	0	0	0	0	0	0	0	0	0	0	0	0	0	0	0	0	0	0	0	0	0	0	0	0	0	0	0	0	0	0	0	0	0	0	0	0	0	0	0	0	0	0	0
Zotu1007	0	0	0	0	0	0	0	0	0	0	0	0	0	0	0	0	0	0	0	0	0	0	0	0	0	0	0	0	25	0	0	0	0	0	0	0	0	0	0	0	0	0	0	0	0	0	0	0	0
Zotu1008	0	0	0	0	0	0	0	0	0	0	0	0	0	0	0	0	0	0	0	0	0	0	0	0	0	0	0	0	0	0	0	0	0	0	0	0	0	0	0	0	0	0	0	0	0	0	0	0	0
Zotu1009	0	0	0	0	0	0	0	0	0	0	0	0	0	0	0	0	0	0	0	0	0	0	0	0	0	0	0	0	0	0	0	0	0	0	0	0	0	0	0	0	0	0	0	0	0	0	0	0	0
Zotu101	0	0	0	0	0	0	0	0	0	0	0	0	0	0	0	0	0	0	4	0	3	0	0	0	0	0	0	0	57	0	0	0	1	0	0	2	0	0	0	0	0	0	0	0	0	0	0	0	0
Zotu1010	0	0	0	0	0	0	0	0	0	0	0	0	0	0	0	0	0	0	0	0	0	0	0	0	0	0	0	0	0	0	0	0	0	0	0	0	0	0	0	0	0	0	0	0	0	0	0	0	0
Zotu1011	0	0	0	0	0	0	0	0	0	0	0	0	0	0	0	0	2	2	0	0	0	0	0	0	0	0	0	0	0	0	0	0	0	0	0	0	0	0	0	0	0	0	0	0	0	0	1	0	0
Zotu1012	0	0	0	0	0	0	0	0	0	0	0	0	0	0	0	0	0	0	0	0	0	0	0	0	0	0	0	0	0	0	0	0	0	0	0	0	0	0	0	0	0	0	0	0	0	0	0	0	0
Zotu1013	0	0	0	0	0	0	0	0	0	0	0	0	0	0	0	0	0	0	0	0	0	0	0	0	0	0	0	0	0	0	0	0	0	0	0	0	0	1	0	0	0	0	0	0	0	0	0	0	0
Zotu1014	0	0	0	0	0	0	0	0	0	0	0	0	0	0	0	0	0	0	0	0	0	0	0	0	0	0	0	0	0	0	0	0	0	0	0	0	0	0	0	0	0	0	0	0	0	0	0	0	0
Zotu1015	0	0	0	0	0	0	1	0	0	0	0	0	0	0	0	0	0	0	0	0	0	0	0	0	0	0	0	0	0	0	0	0	0	0	0	0	0	0	0	0	0	0	0	0	0	0	0	0	0
Zotu1016	0	0	0	0	0	0	0	0	0	0	0	0	0	0	0	0	0	0	0	0	0	0	0	0	0	0	0	0	0	0	0	0	0	0	0	0	0	0	0	0	0	0	0	0	0	0	0	0	0
Zotu1017	0	0	0	0	0	0	0	0	0	0	0	0	0	0	0	0	0	0	0	0	0	0	0	0	0	0	0	0	0	0	0	0	0	0	0	0	0	0	0	0	0	0	0	0	0	0	0	0	0
Zotu1018	0	0	0	0	0	0	0	0	0	0	0	0	0	0	190	0	0	0	0	0	0	0	0	0	0	0	0	0	0	1	0	0	0	0	0	0	0	0	0	0	0	0	0	0	0	0	0	0	0
Zotu1019	0	0	0	0	0	0	0	0	0	0	0	0	0	0	0	0	0	0	0	0	0	0	0	0	0	0	0	0	0	0	0	0	0	0	0	0	0	0	0	0	0	0	0	0	0	0	0	0	0
Zotu102	0	0	0	0	0	0	0	0	0	0	0	0	0	0	0	0	0	0	0	0	0	0	0	0	0	0	1	0	1	0	1	0	1	0	0	0	0	1	2	1	860	0	0	0	0	0	0	0	0
Zotu1020	0	0	0	0	0	0	0	0	0	0	0	0	0	0	0	0	0	0	0	0	0	0	0	0	0	0	0	0	0	0	0	0	0	0	0	0	0	0	0	0	0	0	0	0	0	0	0	0	0
Zotu1021	0	0	0	0	0	0	0	0	0	0	0	0	0	0	0	0	0	0	1	0	0	0	0	0	0	0	0	0	0	0	0	0	0	0	0	0	0	0	0	0	0	0	0	0	0	0	0	0	0
Zotu1022	0	0	0	0	0	0	0	0	0	0	0	524	0	0	0	0	0	0	0	0	0	0	1	0	0	0	0	0	0	0	0	0	0	0	0	0	0	0	0	0	0	0	0	0	0	0	0	0	0
Zotu1023	0	0	0	0	0	0	0	0	0	0	0	0	0	0	0	0	0	0	0	0	0	0	0	0	0	0	0	0	0	0	0	0	0	0	0	0	0	0	0	0	0	0	0	0	0	0	0	0	0
Zotu1024	0	0	0	0	0	0	0	0	0	0	0	0	0	0	0	0	0	0	0	0	0	0	0	0	0	0	0	0	0	0	0	0	0	0	0	0	0	0	0	0	0	0	0	0	0	0	0	0	0
Zotu1025	0	0	0	0	0	0	0	0	0	0	0	0	0	0	0	0	0	0	0	0	0	0	0	0	0	0	0	0	0	0	0	0	0	0	0	0	0	0	0	0	0	0	0	0	0	0	0	0	0
Zotu1026	0	0	0	0	0	0	0	0	0	0	0	0	0	0	0	0	0	0	0	0	0	0	0	0	0	0	0	0	0	0	0	0	0	0	0	0	0	0	0	0	0	0	0	0	0	0	0	0	0
Zotu1027	0	0	0	0	0	0	0	0	0	0	0	0	0	0	0	0	0	0	0	0	0	0	0	0	0	0	0	0	0	0	0	0	0	0	0	0	0	0	0	0	0	0	0	0	0	0	0	0	0
Zotu1028	0	0	0	0	0	0	0	0	0	0	0	0	0	0	0	0	0	0	0	0	0	0	7	0	0	0	0	14	0	0	0	0	0	0	0	0	0	0	0	0	0	0	0	0	0	0	0	0	0
Zotu1029	0	0	0	0	0	0	0	0	0	0	0	0	0	0	0	0	0	0	0	0	0	0	0	0	0	0	0	0	1	0	0	0	0	0	0	0	0	0	0	0	0	0	0	0	0	0	0	0	0
Zotu103	1	0	8	2	0	0	0	1	0	0	0	0	0	0	0	0	0	0	0	1	0	0	0	3	1	2	0	0	0	0	0	0	0	0	0	0	0	0	0	0	0	0	0	0	0	0	0	0	0
Zotu1030	0	0	0	0	0	1	0	0	0	0	0	0	0	0	0	0	0	0	0	0	0	0	0	0	0	0	0	0	0	0	0	0	0	0	0	0	0	0	0	0	0	0	0	0	0	0	0	0	0
Zotu1031	0	0	0	0	0	0	0	0	0	0	0	0	0	0	0	0	0	0	0	0	0	0	0	0	0	0	0	0	0	0	0	0	0	0	0	0	0	0	0	0	0	0	0	0	0	0	0	0	0
Zotu1032	0	0	0	0	0	0	0	0	0	0	0	0	0	0	0	0	0	0	0	0	0	0	0	0	0	0	0	0	0	0	0	0	0	0	0	0	0	0	0	0	0	0	0	0	0	0	0	0	0
Zotu1033	0	0	0	0	0	0	0	0	0	0	0	0	0	0	0	0	0	0	0	0	0	0	0	0	0	0	0	0	0	0	0	0	0	0	0	0	0	0	0	0	0	0	0	0	0	0	0	0	0
Zotu1034	0	0	0	0	0	0	0	0	0	0	0	0	0	0	0	0	0	0	0	0	0	0	0	0	0	0	0	0	0	0	0	0	0	0	0	0	0	0	0	0	0	0	0	0	0	0	0	0	0
Zotu1035	0	0	0	0	0	0	0	1	0	0	0	0	0	0	0	0	0	0	0	0	0	0	0	0	0	0	0	0	0	0	0	0	0	0	0	0	0	0	0	0	0	0	0	0	0	0	0	0	0
Zotu1036	0	0	0	0	0	0	0	0	0	0	0	0	0	0	0	0	0	0	0	0	0	0	0	0	0	0	0	0	0	0	0	0	0	0	0	0	0	0	0	0	0	0	0	0	0	0	0	0	0
Zotu1037	0	0	0	0	0	0	0	0	0	0	0	0	0	0	0	0	0	0	0	0	0	0	0	0	0	0	0	0	0	0	0	0	0	0	0	0	0	0	0	0	0	0	0	0	0	0	0	0	0
Zotu1038	0	1	0	0	0	0	0	0	0	0	0	0	0	0	0	0	0	0	0	0	0	0	0	0	0	0	0	0	0	0	0	0	0	0	0	0	0	0	0	0	0	0	0	0	0	0	0	0	0
Zotu1039	0	0	0	0	0	0	0	0	0	0	0	0	0	0	0	0	0	0	0	0	0	0	0	0	0	0	0	0	0	0	0	0	0	0	0	0	0	0	0	0	0	0	0	0	0	0	0	0	0
Zotu104	0	0	0	3	0	0	0	0	0	0	0	0	0	0	0	0	0	7	0	0	0	0	0	0	0	0	0	0	0	0	0	0	0	0	0	2	0	2	0	0	0	0	0	1	0	0	1	1	0
Zotu1040	0	0	0	0	0	0	0	0	0	0	0	0	0	0	0	0	0	0	0	0	0	0	0	0	0	0	0	0	0	0	0	0	0	0	0	0	0	0	1	0	0	0	0	0	0	0	0	0	0
Zotu1041	0	0	0	0	0	0	0	0	0	0	0	0	0	0	0	0	0	0	0	0	0	0	0	0	0	0	0	0	0	0	0	0	0	0	0	0	0	0	0	0	0	0	0	0	0	0	0	0	0
Zotu1042	0	0	0	0	0	0	0	0	0	0	0	0	0	0	0	0	0	0	0	0	0	0	0	0	0	0	0	0	0	0	0	0	0	0	0	0	0	0	0	0	0	0	0	0	0	0	0	0	0
Zotu1043	0	0	0	0	0	0	0	0	0	0	0	0	0	0	1	0	0	0	0	0	0	0	0	0	0	0	0	0	0	0	0	0	0	0	0	0	0	0	0	0	0	0	0	0	0	0	0	0	0
Zotu1044	0	0	0	0	0	0	0	0	0	0	0	0	0	0	0	0	0	8	0	0	0	0	0	0	0	0	0	0	0	0	0	0	0	0	0	0	0	0	0	0	0	0	0	0	0	0	0	0	0
Zotu1045	0	0	0	0	0	0	0	0	0	0	0	0	0	0	0	0	0	0	0	0	0	0	0	0	0	0	0	0	0	0	0	0	0	0	0	0	0	0	0	0	0	0	0	0	0	0	0	0	0
Zotu1046	0	0	0	0	0	0	0	0	0	0	0	0	0	0	0	0	0	0	0	0	0	0	0	0	0	0	0	0	0	0	0	0	0	0	0	0	0	0	0	0	0	0	0	0	0	0	0	0	0
Zotu1047	0	0	0	0	0	0	0	0	0	0	0	0	0	0	0	0	0	0	0	0	2	0	0	0	0	0	362	0	0	0	0	0	0	0	0	0	0	0	0	0	0	0	0	0	0	0	0	0	0
Zotu1048	0	0	0	0	0	0	0	0	0	0	0	0	0	0	0	0	0	0	0	0	0	0	0	0	0	0	0	0	0	0	0	0	0	0	0	0	0	0	0	0	0	0	0	0	0	0	0	0	0
Zotu1049	0	0	0	0	0	0	0	0	0	0	0	0	0	0	0	0	0	0	0	0	0	0	0	0	0	0	0	0	0	0	0	0	0	0	0	0	0	0	0	0	0	0	0	0	0	0	0	0	0
Zotu105	0	0	0	0	0	0	0	0	0	0	0	0	0	0	0	0	0	0	1	0	0	0	0	0	0	0	0	3	0	0	0	0	0	0	0	0	0	0	0	1	0	1	0	0	0	0	0	0	0
Zotu1050	0	0	0	0	0	0	0	0	0	0	0	0	0	0	0	0	0	0	0	0	0	0	0	0	0	0	0	0	0	0	0	0	0	0	0	0	0	0	0	0	0	0	0	0	0	0	0	0	0
Zotu1051	0	0	0	0	0	0	0	0	0	0	0	0	0	0	0	0	0	0	0	0	0	0	0	0	0	0	0	0	89	0	0	0	0	0	0	0	0	0	0	0	0	0	0	0	0	0	0	0	0
Zotu1052	0	0	0	0	0	0	0	0	0	0	0	0	0	0	0	0	0	0	0	0	0	0	0	0	0	0	0	0	0	0	0	0	0	0	0	0	0	0	0	0	0	0	0	0	0	0	0	0	0
Zotu1053	0	0	0	0	0	0	0	0	0	0	0	1	0	0	0	0	0	0	0	0	0	0	0	0	0	0	0	0	0	0	0	0	0	0	0	0	2	0	0	0	0	0	0	0	0	0	0	0	1
Zotu1054	0	0	0	0	0	0	0	0	0	0	0	0	0	0	0	0	1	0	0	0	0	0	0	0	0	0	0	0	51	0	0	1	0	0	0	0	0	0	0	0	0	0	0	0	0	0	0	0	0
Zotu1055	0	0	0	0	0	0	0	0	0	0	0	0	0	0	0	0	0	0	0	0	0	0	0	0	0	0	0	0	0	0	0	0	0	0	0	0	0	0	0	0	0	0	0	0	0	0	0	0	0
Zotu1056	0	0	0	0	1	0	0	0	0	0	0	0	0	0	0	0	2	0	0	0	0	0	0	0	0	0	0	0	0	0	0	0	0	0	0	0	0	0	0	0	0	0	0	0	0	0	0	0	0
Zotu1057	0	0	0	0	0	0	0	0	0	0	0	0	0	0	0	0	0	0	0	0	0	0	0	0	0	0	0	0	0	0	0	0	0	0	0	0	0	0	0	0	0	0	0	0	0	0	0	0	0
Zotu1058	0	0	0	0	0	0	0	0	0	0	0	0	0	0	0	0	0	0	0	0	0	0	0	0	0	0	0	0	0	0	0	0	0	0	0	0	0	0	0	0	0	0	0	0	0	0	0	0	0
Zotu1059	0	0	0	0	0	0	0	0	0	0	0	0	1	0	0	0	0	0	0	0	0	0	0	0	0	0	0	0	0	0	0	0	0	0	0	0	0	0	0	0	0	0	0	0	0	0	0	0	0
Zotu106	0	0	0	0	5	0	0	0	0	0	0	0	0	0	0	0	0	0	0	0	2	1	0	0	0	0	0	0	0	0	0	0	0	0	8510	0	0	0	1	3	4	0	0	0	2	0	0	0	0
Zotu1060	0	0	0	0	0	0	0	0	0	0	0	0	0	0	0	0	0	0	0	0	0	0	0	0	0	0	0	0	0	0	0	0	0	0	0	0	0	0	0	0	0	0	0	0	0	0	0	0	0
Zotu1061	0	0	0	0	0	0	0	0	0	0	0	0	0	0	0	0	0	0	0	0	0	0	0	0	0	0	0	0	0	0	0	0	0	0	0	0	0	0	0	0	0	0	0	0	0	0	0	0	0
Zotu1062	0	0	0	0	0	0	0	0	0	0	0	0	0	0	0	0	0	0	0	0	0	0	0	0	0	0	0	0	0	0	0	0	0	0	0	0	0	0	0	0	0	0	0	0	0	0	0	0	0
Zotu1063	0	0	0	0	0	0	0	0	0	0	0	0	0	0	0	0	0	0	0	0	0	0	0	0	0	0	0	0	0	0	0	0	0	0	0	0	0	0	0	0	0	0	0	0	0	0	0	0	0
Zotu1064	0	0	0	1	3	0	0	0	0	0	11	0	0	0	0	0	0	0	0	0	0	0	0	0	0	0	0	1	0	0	0	0	0	0	0	0	0	0	0	0	0	0	0	0	0	0	1	0	0
Zotu1065	0	0	1	0	0	0	0	0	0	0	0	0	0	0	0	0	0	0	0	0	0	0	0	0	0	0	1	0	0	0	0	0	0	0	0	0	0	0	0	0	0	0	0	0	0	0	0	0	0
Zotu1066	0	0	0	0	0	0	0	0	0	0	0	0	0	0	0	0	0	0	0	0	0	0	0	0	0	0	0	0	20	0	0	0	0	0	0	0	0	0	0	2	0	0	0	0	0	0	0	0	0
Zotu1067	0	0	0	0	0	0	0	0	0	0	0	0	0	0	0	0	0	0	0	0	0	0	0	0	0	0	0	0	0	0	0	0	0	0	0	2	0	0	0	0	0	0	0	0	0	0	0	0	0
Zotu1068	0	0	0	0	0	0	0	0	0	0	0	0	0	0	0	0	0	0	0	0	0	0	0	0	0	0	0	0	0	0	0	0	0	0	0	0	0	0	0	0	0	0	0	0	0	0	0	0	0
Zotu1069	0	0	0	0	0	0	0	0	0	0	0	0	0	0	0	0	0	0	0	0	0	0	0	0	0	0	0	0	0	0	0	0	0	0	0	0	0	0	0	0	0	0	0	0	0	0	0	0	0
Zotu107	0	0	0	0	0	0	0	0	0	0	0	0	0	0	0	0	0	0	0	0	0	0	0	0	0	0	0	0	0	0	0	0	0	0	0	0	0	0	0	0	0	0	0	0	0	0	0	0	0
Zotu1070	0	0	0	0	0	0	0	0	0	0	0	0	0	0	0	0	0	0	0	0	0	0	0	0	0	0	0	0	0	0	0	0	0	0	0	0	0	0	0	0	0	0	0	0	0	0	0	0	0
Zotu1071	0	0	0	0	0	0	0	0	0	0	0	0	0	0	0	0	0	0	0	0	0	0	0	0	0	0	0	0	0	0	0	0	0	0	0	0	0	0	0	0	0	0	0	0	0	0	0	0	0
Zotu1072	0	0	0	0	0	0	0	0	0	0	0	0	0	0	0	0	0	0	0	0	0	0	0	0	0	0	0	0	0	0	0	0	0	0	0	0	0	0	0	0	0	0	0	0	0	0	0	0	0
Zotu1073	0	0	0	0	0	0	0	0	0	0	0	0	0	0	0	0	0	0	0	0	1	0	0	0	0	0	0	0	0	0	0	0	0	0	0	1	0	0	0	0	0	0	0	0	0	0	0	0	0
Zotu1074	0	0	0	0	0	0	0	0	0	0	0	0	0	0	0	0	0	0	0	0	0	0	0	0	0	0	0	0	0	0	0	0	0	0	0	0	0	0	0	0	0	0	0	0	0	0	0	0	0
Zotu1075	0	0	0	0	0	0	0	0	0	0	0	0	0	0	0	0	0	0	0	0	0	0	0	0	0	0	0	0	0	0	0	0	0	0	0	0	0	0	0	0	0	0	0	0	0	0	0	0	0
Zotu1076	0	0	0	0	0	0	0	0	0	0	0	0	0	0	0	0	0	0	0	0	0	0	0	0	0	0	0	0	0	0	0	0	0	0	0	0	0	0	0	0	0	456	0	1	0	0	0	0	0
Zotu1077	0	0	0	0	0	0	0	0	0	0	0	0	0	0	0	0	0	0	0	0	0	0	0	0	0	0	0	0	0	0	0	0	0	0	0	0	0	0	0	0	0	0	0	0	0	0	0	0	0
Zotu1078	0	0	0	0	0	0	0	0	0	0	0	0	0	0	0	0	0	0	0	0	0	0	0	0	0	0	0	0	0	0	0	0	0	0	0	0	0	0	0	0	0	0	0	0	0	0	0	0	0
Zotu1079	0	0	0	0	0	0	0	0	0	0	0	0	0	0	0	0	0	0	0	0	0	0	0	0	0	0	0	0	0	0	0	0	1	0	0	0	0	0	0	0	0	0	0	0	0	0	0	0	0
Zotu108	2	1	0	0	291	0	0	0	0	0	1	2	2	0	0	3020	1	792	0	1	1	1	0	0	0	0	1	1	0	0	1	0	1	1	0	0	2	0	2	0	0	0	6	0	4	0	0	0	0
Zotu1080	0	0	0	0	0	0	0	0	0	0	0	0	0	0	0	0	0	0	0	0	0	0	0	0	0	0	0	0	0	0	0	0	0	0	0	0	0	0	0	0	0	0	0	0	0	0	0	0	0
Zotu1081	0	0	0	0	0	0	0	0	0	0	0	0	0	0	0	0	0	0	0	0	0	0	0	0	0	0	0	0	0	0	0	0	0	0	0	0	0	0	0	0	0	0	0	0	0	0	0	0	0
Zotu1082	0	0	0	0	0	0	0	0	0	0	0	0	0	0	0	0	0	0	0	0	0	0	0	0	0	0	0	0	0	0	0	0	0	0	0	0	0	0	0	0	0	0	0	0	0	0	0	0	0
Zotu1083	0	0	0	0	0	0	0	0	0	0	0	0	0	0	0	1	0	52	0	0	0	0	0	0	0	0	0	0	0	0	0	0	0	0	0	0	0	0	0	0	0	0	0	0	0	0	0	0	0
Zotu1084	0	0	0	0	0	0	0	0	0	0	0	0	0	0	0	0	0	0	0	0	0	0	0	0	0	0	0	0	0	0	0	0	0	0	0	1	0	0	0	0	0	0	0	0	0	0	0	0	0
Zotu1085	0	0	0	0	0	0	0	0	0	0	0	0	0	0	0	0	0	0	0	1	0	0	0	0	1	0	0	0	0	0	0	0	0	0	0	0	0	0	0	0	0	0	0	0	0	0	0	0	0
Zotu1086	0	0	0	0	0	0	0	0	0	0	0	0	0	0	0	0	0	0	0	0	0	0	0	0	0	0	0	0	0	0	0	0	0	0	0	0	0	0	0	0	0	0	0	0	0	0	0	0	0
Zotu1087	0	0	0	0	0	0	0	0	0	0	0	0	0	0	0	0	0	11	0	0	0	0	0	0	0	0	0	0	0	0	0	0	0	0	0	0	0	0	0	0	0	0	0	0	0	0	0	0	0
Zotu1088	0	0	0	0	0	0	0	0	0	0	0	0	0	0	0	0	0	0	0	0	0	0	0	0	0	0	0	0	0	0	0	0	0	0	0	0	0	0	0	0	0	0	0	0	0	0	0	0	0
Zotu1089	0	0	0	0	0	0	0	0	0	384	0	0	0	0	0	0	0	0	0	0	0	0	0	0	0	0	0	0	0	0	0	0	0	0	0	0	0	0	0	0	0	0	0	0	0	0	0	0	0
Zotu109	0	0	0	0	0	0	0	0	0	0	2	0	0	1	0	0	0	0	0	0	2	0	0	0	1	0	0	0	0	0	0	0	0	0	0	5	0	0	0	0	0	0	0	2	0	0	0	0	0
Zotu1090	0	0	0	0	0	0	0	0	0	0	0	0	0	0	0	0	0	0	0	0	0	0	0	0	0	0	0	0	0	0	0	0	0	0	0	0	0	0	0	0	0	0	0	0	0	0	0	0	0
Zotu1091	0	0	0	0	0	0	0	0	0	0	0	0	0	0	0	0	0	0	0	0	0	0	0	0	0	0	0	0	0	0	0	0	0	0	0	0	0	0	0	0	0	0	0	0	0	0	0	0	0
Zotu1092	0	0	0	0	0	0	0	0	0	0	0	0	0	0	0	0	0	0	0	0	0	0	0	0	0	0	0	0	0	0	0	0	0	0	0	0	0	0	0	0	0	0	0	0	0	0	0	0	0
Zotu1093	0	0	0	0	0	0	0	0	0	0	0	0	0	0	0	0	0	0	0	0	0	0	0	0	0	0	0	0	0	0	0	0	0	0	0	0	0	0	0	0	0	0	0	5	0	0	0	0	0
Zotu1094	0	0	0	0	0	0	0	0	0	0	0	0	0	0	0	0	0	0	0	0	0	0	0	0	0	0	0	0	0	0	0	0	0	0	0	0	0	0	0	0	0	0	0	0	0	0	0	0	0
Zotu1095	0	0	0	0	0	0	0	0	0	0	0	0	0	0	0	0	0	0	0	0	0	0	0	0	0	0	0	0	0	0	0	0	0	0	0	0	0	0	0	0	0	0	0	0	0	0	0	0	0
Zotu1096	0	0	0	0	0	0	0	0	0	0	0	0	0	0	0	0	0	0	0	0	0	0	0	0	0	0	0	0	0	0	0	0	0	0	0	0	0	0	0	0	0	0	3	0	0	0	0	0	0
Zotu1097	0	0	0	0	0	0	0	0	0	0	0	0	0	0	0	0	0	0	0	0	0	0	0	0	0	0	0	0	0	0	0	0	0	0	0	0	0	0	0	0	0	0	0	0	0	0	0	0	0
Zotu1098	0	0	0	0	0	0	0	0	0	0	0	0	0	0	0	0	0	0	0	0	0	0	0	0	0	0	0	0	0	0	0	0	0	0	0	0	0	0	0	0	0	0	0	0	0	0	0	0	0
Zotu1099	0	0	0	0	0	0	0	0	0	0	0	0	0	0	0	0	0	0	0	0	0	0	0	0	0	0	0	0	0	0	0	0	0	0	0	0	0	0	0	0	0	0	0	0	0	0	0	0	0
Zotu11	2	5	0	0	825	1	3	0	4	2	3743	3	2036	1	1	1	0	11	10	1	1	0	175	0	0	1	315	3	10	0	4	459	3712	2724	1	4	5930	4	0	4	1	2060	8	2363	0	740	11	2917	746
Zotu110	0	0	0	0	0	0	662	0	0	0	0	0	0	0	0	0	0	21	0	0	0	0	0	0	1	0	0	0	3	0	0	0	0	0	0	0	0	0	1	0	0	0	0	0	0	0	0	0	0
Zotu1100	0	0	0	0	0	0	0	0	0	0	0	0	0	0	0	0	0	0	0	0	0	0	0	0	0	0	0	0	0	0	0	0	0	0	0	0	0	0	0	0	0	0	0	0	0	0	0	0	0
Zotu1101	0	0	0	0	0	0	0	0	0	0	0	0	0	0	0	0	0	0	0	0	0	0	0	0	0	0	0	0	0	0	0	1	0	0	0	0	0	0	0	0	0	0	0	0	0	0	0	0	0
Zotu1102	0	0	0	0	0	0	0	0	0	0	0	0	0	0	0	0	0	0	0	0	1	0	0	0	0	0	0	0	0	0	0	0	0	0	0	0	0	0	0	0	0	0	0	0	0	0	0	0	0
Zotu1103	0	0	0	0	0	0	0	0	0	0	0	0	0	0	0	0	0	0	0	0	0	0	0	0	0	0	0	0	0	0	0	0	0	0	0	0	0	0	0	0	0	0	0	0	0	0	1	0	0
Zotu1104	0	0	0	0	0	0	0	0	0	0	0	0	0	0	0	0	0	0	0	0	1	1	0	0	0	0	0	0	0	0	0	0	0	0	0	0	0	0	0	0	0	0	0	0	0	0	0	0	0
Zotu1105	0	0	0	0	0	0	0	0	0	0	0	0	0	0	0	0	0	0	0	0	0	0	0	0	0	0	0	0	0	0	0	0	0	0	0	0	0	0	0	0	0	0	0	0	0	0	0	0	0
Zotu1106	0	0	0	0	0	0	0	0	0	0	0	0	0	0	0	0	0	0	0	0	0	0	0	0	0	0	0	0	0	0	0	0	0	0	0	0	0	0	0	0	0	0	0	0	0	0	0	0	0
Zotu1107	0	0	0	0	0	0	0	0	0	0	0	0	0	0	0	0	0	0	0	0	0	0	0	0	0	0	0	0	0	0	0	0	0	0	0	0	0	0	0	0	0	0	0	0	0	0	0	0	0
Zotu1108	0	0	0	0	0	0	0	0	0	0	0	0	0	0	0	0	0	0	0	0	0	0	0	0	0	0	0	0	0	0	0	0	0	0	0	0	0	0	0	0	0	0	0	0	0	0	0	0	0
Zotu1109	0	0	0	0	0	0	0	0	0	0	0	0	0	0	0	0	0	0	0	0	0	0	0	0	0	0	0	0	0	0	0	0	0	0	0	0	0	0	0	0	0	0	0	0	0	0	0	0	0
Zotu111	0	0	0	0	10	0	0	1	1	38	2	51	0	0	0	0	0	5	159	0	2	0	0	0	0	0	35	15	0	0	135	81	184	105	0	1485	0	3	1	0	0	36	0	3	0	144	1	2	0
Zotu1110	0	0	0	0	0	0	0	0	0	0	0	0	0	0	0	0	0	0	0	0	0	0	0	0	0	0	0	0	0	0	0	0	0	0	0	0	0	0	0	0	0	0	0	0	0	0	0	0	0
Zotu1111	0	0	0	0	0	1	0	0	0	0	0	0	0	0	0	0	0	0	0	0	0	0	0	0	0	0	0	0	0	0	0	0	0	0	0	0	0	0	0	0	0	0	0	0	0	0	0	0	0
Zotu1112	0	0	0	0	0	0	0	0	0	0	0	0	0	0	0	0	0	0	0	0	0	0	0	0	0	0	0	0	72	0	0	0	0	0	0	0	0	0	0	0	0	0	0	0	0	0	0	0	0
Zotu1113	0	0	0	0	0	0	0	0	0	0	0	0	0	0	0	0	0	0	0	0	0	0	0	0	0	0	0	0	0	0	0	0	0	0	0	0	0	0	0	0	0	0	0	0	0	0	0	0	0
Zotu1114	0	0	0	0	0	0	0	0	0	0	0	0	0	0	0	0	0	0	0	0	0	0	0	0	0	0	0	0	0	0	0	0	0	0	0	0	0	0	0	0	0	0	0	0	0	0	0	0	0
Zotu1115	0	0	0	0	0	0	0	0	0	0	0	0	0	0	0	0	0	0	0	0	0	0	0	0	0	0	0	0	0	0	0	0	0	0	0	0	0	0	0	0	0	0	0	0	0	0	0	0	0
Zotu1116	0	0	0	0	0	0	0	0	0	0	0	0	0	0	0	0	1	0	0	0	0	0	0	0	0	0	0	0	0	0	0	0	0	0	0	0	0	0	0	0	0	0	0	0	0	0	0	0	0
Zotu1117	0	0	0	0	0	0	0	0	0	0	0	0	0	0	0	0	0	0	0	0	0	0	0	0	0	0	0	0	0	0	0	0	0	0	0	0	0	0	0	0	0	0	0	0	0	0	0	0	0
Zotu1118	0	0	0	0	0	0	0	0	0	0	0	0	0	0	0	0	0	0	0	0	0	0	0	0	0	0	0	0	0	0	0	0	0	0	0	0	0	0	0	0	0	0	0	0	0	0	0	0	0
Zotu1119	0	0	0	0	0	0	0	0	0	0	0	0	0	0	0	0	0	0	0	0	0	0	0	0	0	0	0	0	0	0	0	0	0	0	0	0	0	0	0	0	0	0	0	0	0	0	0	0	0
Zotu112	0	0	0	0	141	0	0	0	0	0	0	0	0	0	0	0	0	20	0	0	0	0	1	0	0	0	0	0	133	0	0	0	0	0	0	2	0	1	1	0	1	1	0	1	0	1043	0	1	0
Zotu1120	0	0	0	0	0	0	0	0	0	0	0	0	0	0	0	0	0	0	0	0	0	0	1	0	0	0	0	0	0	0	0	0	0	0	0	0	0	0	0	0	0	0	0	0	0	0	0	0	0
Zotu1121	0	0	0	0	0	0	0	0	0	0	0	0	0	0	0	1	0	0	0	0	0	0	0	0	0	0	0	1	0	0	0	0	0	0	0	0	0	0	0	0	0	0	0	0	0	0	0	0	0
Zotu1122	0	0	0	0	0	0	0	0	0	0	0	0	0	0	0	0	0	0	0	0	0	0	0	0	0	0	0	0	0	0	0	0	0	0	0	0	0	0	0	0	0	0	0	0	0	0	0	0	0
Zotu1123	0	0	0	0	0	0	0	0	0	0	0	0	0	0	0	0	0	0	0	0	0	0	0	0	0	0	0	0	0	0	0	0	0	0	0	0	0	0	0	0	0	0	0	0	0	0	0	0	0
Zotu1124	0	0	0	0	0	0	0	0	0	0	0	0	0	0	0	0	0	0	0	0	0	0	0	0	0	0	0	0	0	0	0	0	0	0	0	0	0	0	0	0	0	0	0	0	0	0	0	0	0
Zotu1125	0	0	0	0	0	0	0	0	0	0	0	0	0	0	0	0	0	0	0	0	0	0	0	0	0	0	0	0	0	0	0	0	0	0	0	0	0	0	0	0	0	0	0	0	0	0	0	0	0
Zotu1126	0	0	0	0	0	0	0	0	0	0	0	0	0	0	0	0	0	0	0	0	0	0	0	0	0	0	0	0	0	0	0	0	0	0	0	0	0	0	0	0	0	0	0	0	0	0	0	0	0
Zotu1127	0	0	0	0	0	1	0	0	0	0	0	0	0	0	0	0	0	0	0	0	0	0	0	0	0	0	0	0	0	0	0	0	0	0	0	0	0	0	0	0	0	0	0	0	0	0	0	0	0
Zotu1128	0	0	0	0	0	0	0	0	0	0	0	0	0	0	0	0	0	0	0	0	0	0	0	0	0	0	0	0	0	0	0	0	0	0	0	0	0	0	0	0	0	0	0	0	0	0	0	0	0
Zotu1129	0	0	0	0	0	0	0	0	0	0	0	0	0	0	0	0	0	0	0	0	0	0	0	0	0	0	0	0	0	0	0	0	0	0	0	0	0	0	0	0	0	0	0	0	0	0	0	0	0
Zotu113	0	0	0	0	0	0	0	0	0	0	0	0	0	0	0	0	0	0	0	0	0	0	0	0	0	0	0	0	0	0	0	0	0	0	0	0	0	0	0	0	0	0	0	0	0	0	0	0	0
Zotu1130	0	0	0	0	0	0	0	0	0	0	0	0	0	0	0	0	0	0	0	0	0	0	0	0	0	0	0	0	0	0	0	0	0	0	0	0	0	0	0	0	0	0	0	0	0	0	0	0	0
Zotu1131	0	0	0	0	0	0	0	0	0	0	0	0	0	0	0	0	0	0	0	0	0	0	0	0	0	0	0	0	0	0	0	0	0	0	0	0	0	0	0	0	0	0	0	0	0	0	0	0	0
Zotu1132	0	0	0	0	0	0	0	0	0	0	0	0	0	0	0	0	0	0	0	0	0	0	0	0	0	0	0	0	0	0	0	0	0	0	0	0	0	0	0	0	0	0	0	0	0	0	0	0	0
Zotu1133	0	0	0	0	0	0	0	0	0	0	0	0	0	0	0	0	0	0	0	0	0	0	0	0	0	0	0	0	0	0	0	0	0	0	0	0	0	0	0	0	0	0	0	0	0	0	0	0	0
Zotu1134	0	0	0	0	0	0	0	0	0	0	0	0	0	0	0	0	0	0	0	0	0	0	0	0	0	0	0	0	0	0	0	0	0	0	0	0	0	0	0	0	0	0	0	0	0	0	0	0	0
Zotu1135	0	0	0	0	0	0	0	0	0	0	0	0	0	0	0	0	0	0	0	0	0	0	0	0	0	0	0	0	0	0	0	0	0	0	0	0	0	0	0	0	0	0	0	0	0	0	0	0	0
Zotu1136	0	0	0	0	0	0	1	0	0	0	0	0	0	0	0	0	0	0	0	0	0	0	0	0	0	0	0	0	0	0	0	0	0	0	0	0	0	0	0	0	0	0	0	0	0	0	0	0	0
Zotu1137	0	0	0	0	0	0	0	0	0	0	0	0	0	0	0	0	0	0	0	0	0	0	0	0	0	0	0	0	0	0	0	0	0	0	0	0	0	0	0	0	0	0	0	0	0	0	0	0	0
Zotu1138	0	0	0	0	0	0	0	0	0	0	0	0	0	0	0	0	0	0	0	0	0	0	0	0	0	0	0	0	0	0	0	0	0	0	0	0	0	0	0	0	0	0	0	0	0	0	0	0	0
Zotu1139	0	0	0	0	0	0	0	0	0	0	0	0	0	0	0	0	0	0	0	0	0	0	0	0	0	0	0	0	0	0	0	0	0	0	0	0	0	0	0	0	0	0	0	0	0	0	0	0	0
Zotu114	0	0	0	0	0	0	0	0	0	0	0	0	0	0	1	0	0	0	0	1	0	0	0	0	0	0	0	0	0	0	0	0	0	0	0	0	0	0	0	0	0	0	0	0	0	0	0	0	0
Zotu1140	0	0	0	0	0	0	0	0	0	0	0	0	0	0	0	0	0	0	0	0	0	0	0	0	0	0	0	0	0	0	0	0	0	0	0	0	0	0	0	0	0	0	0	0	2	0	0	0	0
Zotu1141	0	0	0	0	0	0	0	0	0	0	0	0	0	0	0	0	0	0	0	0	0	0	0	0	0	0	0	0	0	0	0	0	0	0	0	0	0	0	0	0	0	0	0	0	0	0	0	0	0
Zotu1142	0	0	0	0	0	0	0	0	0	0	0	0	0	0	0	0	0	0	0	0	0	0	0	0	0	0	0	0	0	0	0	0	0	0	0	0	0	0	0	0	0	0	0	0	0	0	0	0	0
Zotu1143	0	0	0	0	0	0	0	0	0	0	0	0	0	0	0	0	0	0	0	0	0	0	0	0	0	0	0	0	0	0	0	0	0	0	0	0	0	0	0	0	0	0	0	0	0	0	0	0	0
Zotu1144	0	0	0	0	0	0	0	0	0	0	0	0	0	0	0	0	0	0	0	0	0	0	0	0	0	0	0	0	0	0	0	0	0	0	0	0	0	0	0	0	0	0	0	0	0	0	0	0	0
Zotu1145	0	0	0	0	0	0	0	0	0	0	0	0	0	0	1	0	0	0	0	0	0	0	0	0	0	0	0	0	63	0	0	0	0	0	0	0	0	0	0	0	0	0	0	0	0	0	0	0	0
Zotu1146	0	0	0	0	0	0	0	0	0	0	0	0	0	0	0	0	0	0	0	0	0	0	0	0	0	0	0	0	0	0	0	0	0	0	0	0	0	0	0	0	0	0	0	0	0	0	0	0	0
Zotu1147	0	0	5	0	7	0	0	0	0	5	0	0	5	0	0	0	14	2	6	0	0	0	0	0	0	0	0	0	0	0	0	0	0	0	0	0	0	12	0	0	0	0	0	0	0	0	11	0	0
Zotu1148	0	0	0	0	0	0	0	0	0	0	0	0	0	0	0	0	0	0	0	0	0	0	0	0	0	0	0	0	35	0	0	0	0	0	0	0	0	0	0	0	0	0	0	0	0	0	0	0	0
Zotu1149	0	0	0	0	0	0	0	0	0	0	0	0	0	0	0	0	0	0	0	0	0	0	0	0	0	0	0	0	0	0	0	0	0	0	0	0	0	0	0	0	0	0	0	0	0	0	0	0	0
Zotu115	0	0	0	0	0	0	0	0	0	0	0	0	0	0	0	0	0	0	0	0	1	0	0	0	0	0	0	0	0	0	0	1	0	0	0	0	0	0	0	0	3	0	0	0	0	0	2	0	0
Zotu1150	0	0	0	0	0	0	0	0	0	0	0	218	0	0	0	0	0	0	0	0	0	0	0	0	0	0	0	0	0	0	0	0	0	0	0	0	0	0	0	0	0	0	0	0	0	0	0	0	0
Zotu1151	0	0	0	0	0	0	0	0	0	0	0	0	0	0	0	0	0	0	0	0	0	0	0	0	0	0	0	0	0	0	0	0	0	0	0	0	0	0	1	0	0	0	0	0	0	0	0	0	0
Zotu1152	0	0	0	0	0	0	0	0	325	1	0	0	3	0	0	0	0	0	0	0	0	0	0	0	0	0	0	0	0	0	0	0	0	0	0	0	0	0	0	0	0	0	0	0	0	0	0	0	0
Zotu1153	0	0	0	0	0	0	0	0	0	0	0	0	0	0	297	0	0	0	0	0	0	0	0	0	0	0	0	0	0	0	0	0	0	0	0	0	0	0	0	0	0	0	0	0	0	0	0	0	0
Zotu1154	0	0	0	0	0	0	0	0	0	0	0	0	0	0	0	0	0	0	0	0	0	0	0	0	0	0	0	0	0	0	0	0	0	0	0	0	0	0	0	0	0	0	0	0	0	0	0	0	0
Zotu1155	0	0	0	0	0	0	0	0	0	0	0	0	0	0	0	0	0	0	0	0	0	0	0	0	0	0	0	0	0	0	0	0	0	0	0	0	0	0	0	0	0	0	0	0	0	0	0	0	0
Zotu1156	0	0	0	0	0	0	0	0	0	0	0	0	0	0	0	0	0	0	0	0	0	0	0	0	0	0	0	0	0	0	0	0	0	0	0	0	0	0	0	0	0	0	0	0	0	0	0	0	0
Zotu1157	0	0	0	0	0	0	0	0	0	0	0	0	0	0	0	0	0	0	0	0	0	0	0	0	0	0	0	0	0	0	0	0	0	0	0	0	0	0	0	0	0	0	0	0	0	0	0	0	0
Zotu1158	0	0	0	0	0	0	0	0	0	0	0	0	0	0	0	0	452	0	0	0	0	0	0	0	0	0	0	0	0	0	0	0	0	0	0	0	0	0	0	0	0	0	0	0	0	0	0	0	0
Zotu1159	0	0	0	0	0	0	0	0	0	0	0	0	0	0	0	0	0	0	0	0	0	0	0	0	0	0	0	0	0	0	0	0	0	0	0	0	0	0	0	0	0	0	0	0	0	0	0	0	0
Zotu116	0	0	0	0	100	1	0	0	0	0	0	0	0	1	2177	0	0	18	0	0	0	0	0	0	5	0	0	0	1	0	0	0	0	0	0	0	0	0	0	2	2	0	0	0	0	0	0	0	0
Zotu1160	0	0	0	0	0	0	0	0	0	0	0	0	0	0	0	0	0	0	0	0	0	0	0	0	0	0	0	0	0	0	0	0	0	0	0	0	0	0	0	0	0	0	0	0	0	0	0	0	0
Zotu1161	0	0	0	0	0	0	0	0	0	0	0	0	0	0	0	0	0	0	0	0	0	0	0	0	0	0	0	0	0	0	0	0	0	0	0	0	0	0	0	0	0	0	0	0	0	0	0	0	0
Zotu1162	0	0	0	0	0	0	0	0	0	0	0	0	314	0	0	0	0	0	0	0	0	0	0	0	0	0	0	0	0	0	0	0	0	0	0	0	0	0	0	0	0	0	0	0	0	0	0	0	0
Zotu1163	0	0	0	0	0	0	0	0	0	0	0	0	0	0	0	0	0	0	0	0	0	0	1	0	0	0	0	0	0	0	0	0	0	0	0	0	0	0	0	0	0	0	0	0	0	0	0	0	1
Zotu1164	0	0	0	0	0	0	0	0	0	0	0	0	0	0	0	0	0	0	0	0	0	0	0	0	0	0	0	0	0	0	0	0	0	0	0	0	0	0	0	0	0	0	0	0	0	0	0	0	0
Zotu1165	0	0	0	0	0	0	0	0	0	0	0	0	0	0	0	0	0	0	0	0	0	0	0	0	0	0	0	0	0	0	0	0	0	0	0	0	0	0	0	0	0	0	0	0	0	0	0	0	0
Zotu1166	0	0	0	0	0	0	0	0	0	0	0	0	0	0	0	0	0	0	1	0	0	0	0	0	0	0	0	0	0	0	0	0	0	0	0	0	0	0	0	0	0	0	0	0	0	0	0	0	0
Zotu1167	0	0	0	0	0	0	0	0	0	0	0	0	0	0	0	0	0	0	0	0	0	0	0	0	0	0	0	0	0	0	0	0	0	0	0	0	0	0	0	0	0	0	0	0	0	0	0	0	0
Zotu1168	0	0	0	0	0	0	0	0	0	0	0	0	0	0	0	0	0	0	0	0	0	0	0	0	0	0	0	0	0	0	0	0	0	0	0	0	0	0	0	0	0	0	0	0	0	0	0	0	0
Zotu1169	0	0	0	0	0	0	0	0	0	0	0	0	0	0	0	0	0	0	0	0	0	0	0	0	0	0	0	0	0	0	0	0	0	0	0	0	0	0	0	0	0	0	0	0	0	0	0	0	0
Zotu117	0	0	0	0	0	0	0	0	0	99	2104	1	1	0	0	0	0	7	0	0	0	0	0	0	0	0	0	0	0	0	0	0	0	0	0	1	2010	0	0	0	0	0	0	0	0	0	1	0	0
Zotu1170	0	0	0	0	0	0	0	0	0	0	0	0	0	0	0	0	0	0	0	0	0	0	0	0	0	0	0	0	0	0	0	0	0	0	0	0	0	0	0	0	0	0	0	0	0	0	0	0	0
Zotu1171	0	0	0	0	0	0	0	0	0	0	0	0	0	0	0	0	0	0	0	0	0	0	0	0	0	0	0	0	0	0	0	0	0	0	0	0	0	0	0	0	0	0	0	0	0	0	0	0	0
Zotu1172	0	0	0	0	0	0	0	0	0	0	0	0	0	0	0	0	0	0	0	0	0	0	0	0	0	0	0	0	0	0	0	0	0	0	0	0	0	0	0	0	0	0	0	0	0	0	0	0	0
Zotu1173	0	0	0	0	0	0	0	0	0	0	0	0	0	0	0	0	0	0	0	0	0	0	0	0	0	0	0	0	0	0	0	0	0	0	0	0	0	0	0	0	0	0	0	0	0	0	0	0	0
Zotu1174	0	0	0	0	0	0	0	0	0	0	0	0	0	0	0	0	0	0	0	0	0	0	0	0	0	0	0	0	0	0	0	0	0	0	0	0	0	0	0	0	0	0	0	0	0	0	0	0	0
Zotu1175	0	0	0	0	0	0	0	0	0	0	0	0	0	0	0	0	0	0	0	0	0	0	0	0	0	0	0	0	0	0	0	0	0	0	0	0	0	0	0	0	0	0	0	0	0	0	0	0	0
Zotu1176	0	0	0	0	0	0	0	0	0	0	0	0	0	0	0	0	0	0	0	0	0	0	0	0	0	0	0	0	0	0	0	0	0	0	0	0	0	0	0	0	0	0	0	0	0	0	0	0	0
Zotu1177	0	0	0	0	0	0	0	0	0	0	0	0	0	0	0	0	0	0	0	0	0	0	0	0	0	0	0	0	0	0	0	0	0	0	0	0	0	0	0	0	0	0	0	0	0	0	0	0	0
Zotu1178	0	0	0	0	0	0	0	0	0	0	0	0	0	0	0	0	0	0	0	0	0	0	0	0	0	0	0	0	0	0	0	0	0	0	0	0	0	0	0	0	0	0	0	0	0	0	0	0	0
Zotu1179	0	0	0	0	0	0	0	0	0	0	0	0	0	0	0	0	0	0	0	0	0	0	0	0	0	0	0	0	0	0	0	0	0	0	0	0	0	0	0	0	0	0	0	0	0	0	0	0	0
Zotu118	0	1	0	0	0	0	0	0	0	0	0	0	0	0	0	0	1	0	0	0	0	0	0	0	1	0	0	1	0	0	0	0	0	0	0	0	0	0	0	0	0	0	0	0	0	0	0	0	0
Zotu1180	0	0	0	0	0	0	0	0	0	0	0	0	0	0	0	0	0	0	0	0	0	0	0	0	0	0	0	0	0	0	0	0	0	0	0	0	0	0	0	0	0	0	0	0	0	0	0	0	0
Zotu1181	0	0	0	0	0	0	0	0	0	0	0	0	0	0	0	0	0	0	0	0	0	0	0	0	0	0	0	0	0	0	0	0	0	0	0	0	0	0	0	0	0	0	0	0	0	0	0	0	0
Zotu1182	0	0	0	0	0	0	0	0	0	0	0	0	0	0	0	0	0	0	0	0	0	0	0	0	0	0	0	0	0	0	0	0	0	0	0	0	0	0	0	0	0	0	0	0	0	1	0	0	0
Zotu1183	0	0	0	0	0	0	0	0	0	0	0	0	0	0	0	0	0	1	0	0	0	0	0	0	0	0	0	0	0	0	0	0	0	0	0	0	0	0	0	0	0	0	0	0	0	0	0	0	0
Zotu1184	0	0	0	0	0	0	0	0	0	0	0	0	0	0	0	0	0	0	0	0	0	0	0	0	0	0	0	0	0	0	0	0	0	0	0	0	0	0	0	0	0	0	0	0	0	0	0	0	0
Zotu1185	0	0	0	0	0	0	0	0	0	0	0	0	0	0	0	0	0	0	0	0	0	0	0	0	0	0	0	0	0	0	0	0	0	0	0	0	0	0	0	0	0	0	0	0	0	0	0	0	0
Zotu1186	0	0	0	0	0	0	0	0	0	0	0	0	0	0	0	0	0	0	0	0	0	0	0	0	0	0	0	0	0	0	0	0	0	0	0	0	0	0	0	0	0	0	0	0	0	0	0	0	0
Zotu1187	0	0	0	0	0	0	0	0	0	0	0	0	0	0	0	0	0	0	0	0	0	0	0	0	0	0	0	0	0	0	0	0	0	0	0	0	0	0	0	0	0	0	0	0	0	0	0	0	0
Zotu1188	0	0	0	0	0	0	0	0	0	0	0	0	0	0	0	0	0	0	0	0	0	0	0	0	0	0	0	0	0	0	0	0	0	0	0	0	0	0	0	0	0	0	0	0	0	0	0	0	0
Zotu1189	0	0	0	0	0	0	0	0	0	0	0	0	0	0	0	0	0	0	0	0	0	0	0	0	0	0	0	0	0	0	0	0	0	0	0	0	0	0	0	0	0	0	0	0	0	0	0	0	0
Zotu119	0	0	0	0	0	1	0	2	0	0	0	0	0	0	0	0	0	11	0	0	0	0	0	0	0	0	0	0	0	0	3	0	0	0	0	0	0	0	0	0	0	0	3	0	0	0	0	0	0
Zotu1190	0	0	0	0	0	0	0	0	0	0	0	0	0	0	0	0	0	0	0	0	0	0	0	0	0	0	0	0	0	0	0	0	0	0	0	0	0	0	0	0	0	0	0	0	0	0	0	0	0
Zotu1191	0	0	0	0	0	0	0	0	0	0	0	0	0	0	0	0	0	0	0	0	0	0	0	0	0	0	0	0	0	0	0	0	0	0	0	0	0	0	0	0	0	0	0	0	0	0	0	0	0
Zotu1192	0	0	0	0	0	0	0	0	0	0	0	0	0	0	0	0	0	0	0	0	0	0	0	0	0	0	0	0	0	0	0	0	0	0	0	0	0	0	0	0	0	0	0	0	0	0	0	0	0
Zotu1193	0	0	0	0	0	0	0	0	0	0	0	0	0	0	0	0	0	0	0	0	0	0	0	0	0	0	0	0	0	0	0	0	0	0	0	0	0	0	0	0	0	0	0	0	0	0	0	0	0
Zotu1194	0	0	0	0	0	0	0	0	0	0	0	0	0	0	0	0	0	0	0	0	0	0	0	0	0	0	0	0	0	0	0	0	0	0	0	0	0	0	0	0	0	0	0	0	0	0	0	0	0
Zotu1195	0	0	0	0	0	0	0	0	0	0	0	0	0	0	0	0	0	0	0	0	0	0	0	0	0	0	0	0	0	0	0	0	0	0	0	0	0	0	0	0	0	0	0	0	0	0	0	0	0
Zotu1196	0	0	0	0	0	0	0	0	0	0	0	0	0	0	0	0	0	0	0	0	0	0	0	0	0	0	0	0	0	0	0	0	0	0	0	0	0	0	0	0	0	0	0	0	0	0	0	0	0
Zotu1197	0	0	0	0	0	0	0	0	0	0	0	0	0	0	0	0	0	0	0	0	0	0	0	0	0	0	0	0	0	0	0	0	0	0	0	0	0	0	0	0	0	0	0	0	0	0	0	0	0
Zotu1198	0	0	0	0	0	1	0	0	0	0	0	0	0	0	0	0	0	0	0	0	0	0	0	0	0	0	0	0	0	0	0	0	0	0	0	0	0	0	0	0	0	0	0	0	0	0	0	0	0
Zotu1199	0	0	0	0	0	0	0	0	0	0	0	0	1	0	0	0	0	0	0	0	0	0	0	0	0	0	0	0	0	0	0	0	0	0	0	0	0	0	0	0	0	0	0	0	0	0	0	0	0
Zotu12	9	4	629	7	5739	726	3371	8	2633	401	3	5	663	4114	5	3531	6750	1034	863	5	4	2	6	6	3	2	3	1	11	1	7	5	20	1132	10	1	1160	1752	25	7	3	444	1046	3	3513	403	10	1508	3351
Zotu120	0	0	0	0	0	3	0	0	0	0	0	0	0	0	0	0	0	8	0	0	0	0	0	1	0	0	0	0	44	0	0	0	0	0	1	0	1	0	3598	0	3	0	1	0	0	0	0	0	0
Zotu1200	0	0	0	0	0	0	0	0	0	0	0	0	0	0	0	0	0	0	0	0	0	0	0	0	0	0	0	0	0	0	0	0	0	0	0	0	0	0	0	0	0	0	0	0	0	0	0	0	0
Zotu1201	0	0	0	0	0	0	0	0	0	0	0	0	0	0	0	0	0	0	0	0	0	0	0	0	0	0	0	0	0	0	0	0	0	0	0	0	0	0	0	0	0	0	0	0	0	0	0	0	0
Zotu1202	0	0	0	0	0	0	0	0	0	0	0	0	0	0	0	0	0	0	0	0	0	0	0	0	0	0	0	0	0	0	0	0	0	0	0	0	0	0	0	0	0	0	0	0	0	0	0	0	0
Zotu1203	0	0	0	0	0	0	0	0	0	0	0	0	0	0	0	0	0	0	0	0	0	0	0	0	0	0	0	0	0	0	0	0	0	0	0	0	0	0	0	0	0	0	0	0	0	0	0	0	0
Zotu1204	0	0	0	0	0	0	0	0	0	0	0	0	0	0	0	0	0	0	0	0	0	0	0	0	0	0	0	0	0	0	0	0	0	0	0	0	0	0	0	0	0	0	0	0	0	0	0	0	0
Zotu1205	0	0	0	0	0	0	0	0	0	0	0	0	0	0	0	0	0	0	0	0	0	0	0	0	0	0	0	0	0	0	0	0	0	0	0	0	0	0	0	0	0	0	0	0	0	0	0	0	0
Zotu1206	0	0	0	0	0	0	0	0	0	0	0	0	0	0	0	0	0	0	0	0	0	0	0	0	0	0	1	0	0	0	0	0	0	0	0	0	0	0	0	0	0	0	0	0	0	0	0	0	0
Zotu1207	0	0	0	0	0	0	0	0	0	0	0	0	0	0	0	0	0	0	0	0	0	0	0	0	0	0	0	0	0	0	0	0	0	0	0	0	0	0	0	0	0	0	0	0	0	0	0	0	0
Zotu1208	0	0	0	0	0	0	0	0	0	0	0	0	0	1	0	0	0	0	0	0	0	0	0	0	0	0	0	0	50	0	0	0	0	0	1	0	0	0	0	0	0	0	0	0	0	0	0	0	0
Zotu1209	0	0	0	0	0	0	0	0	0	0	0	0	0	0	0	0	0	0	0	0	0	0	0	0	0	0	0	0	0	0	0	0	0	0	0	0	0	0	0	0	0	0	0	0	0	0	0	0	0
Zotu121	1	0	1	0	2	0	0	0	0	0	1	0	1568	0	0	0	0	0	4	0	0	0	1	0	0	0	0	0	0	0	0	1	0	0	0	0	0	0	0	0	0	0	0	0	0	0	2	0	0
Zotu1210	0	0	0	0	0	0	0	0	0	0	0	0	0	0	0	0	0	0	0	0	0	0	0	0	0	0	0	0	0	0	0	0	0	0	0	0	0	0	0	0	0	0	0	0	0	0	0	0	0
Zotu1211	0	0	0	0	0	0	0	0	0	0	0	0	0	0	0	0	0	0	0	0	0	0	0	0	0	0	0	0	0	0	0	0	0	0	0	0	0	0	0	0	0	0	0	0	0	0	0	0	0
Zotu1212	0	0	0	0	0	0	0	0	0	0	0	0	0	0	0	0	0	0	0	0	0	0	0	0	0	0	0	0	0	0	0	0	0	0	0	0	0	0	0	0	0	0	0	0	0	0	0	0	0
Zotu1213	0	0	0	0	0	0	0	0	0	0	0	0	0	0	0	0	0	0	0	0	0	0	0	0	0	0	0	0	0	0	0	0	0	0	0	0	0	0	0	0	0	0	0	0	0	0	0	0	0
Zotu1214	0	0	0	0	0	0	0	0	0	0	0	0	0	0	0	0	0	0	0	0	0	0	0	1	0	0	0	0	0	0	0	0	0	0	0	0	0	0	0	0	0	0	0	1	0	0	0	0	0
Zotu1215	0	0	0	0	0	0	0	0	0	0	0	0	0	0	0	0	0	0	0	0	0	0	0	0	0	0	0	0	0	0	0	0	0	0	0	0	0	0	0	0	0	0	0	0	0	0	0	0	0
Zotu1216	0	0	0	0	0	0	0	0	0	0	0	0	0	0	0	0	0	0	0	0	0	0	0	0	0	0	0	0	0	0	0	0	0	0	0	0	0	0	0	0	0	0	0	0	0	0	0	0	0
Zotu1217	0	0	0	0	0	0	0	0	0	0	0	0	0	0	0	0	0	0	0	0	0	0	0	0	0	0	0	0	0	0	0	0	0	0	0	0	0	0	0	0	0	0	0	0	0	0	0	0	0
Zotu1218	0	0	0	0	0	0	0	0	0	0	0	0	0	0	0	0	0	0	0	0	0	0	0	0	0	0	0	0	2	0	0	0	0	0	0	0	0	0	0	0	0	0	0	0	0	0	0	0	0
Zotu1219	0	0	0	0	0	0	0	0	0	0	0	0	0	0	0	0	0	0	0	0	0	0	0	0	0	0	0	0	0	0	0	0	0	0	0	0	0	0	0	0	0	0	0	0	0	0	0	0	0
Zotu122	0	0	0	0	0	0	0	0	0	0	0	0	0	0	0	0	1	0	0	0	0	0	0	0	0	0	0	0	0	0	0	0	0	0	1	0	0	1	0	0	2	0	0	0	1	0	0	0	0
Zotu1220	0	0	0	0	0	0	0	0	0	0	0	0	0	0	0	0	0	0	0	0	0	0	0	0	0	0	0	0	0	0	0	0	0	0	0	0	1	0	0	0	0	0	0	0	0	0	0	0	0
Zotu1221	0	0	0	0	0	0	0	0	0	0	0	0	0	0	0	0	0	0	0	0	0	0	0	0	0	0	0	0	1	0	0	0	0	0	0	0	0	0	0	0	0	0	0	0	0	0	0	0	0
Zotu1222	0	0	0	0	0	0	0	0	0	0	0	0	0	0	0	0	0	0	0	0	0	0	0	0	0	0	0	0	0	0	0	0	0	0	0	0	0	0	0	0	0	0	0	0	0	0	0	0	0
Zotu1223	0	0	0	0	0	0	0	0	0	0	0	0	0	0	0	0	0	0	0	0	0	0	0	0	0	0	0	0	0	0	0	0	0	0	0	0	0	0	0	0	0	0	0	0	0	0	0	0	0
Zotu1224	0	0	0	0	0	0	0	0	0	0	0	0	0	0	0	0	0	0	0	0	0	0	0	0	0	0	0	0	0	0	0	0	0	0	0	0	0	0	0	0	0	0	0	0	0	0	0	0	0
Zotu1225	0	0	0	0	0	0	0	0	0	0	0	0	0	0	0	0	0	0	0	0	0	0	0	0	0	0	0	0	0	0	0	0	0	0	0	0	0	0	0	0	0	0	0	0	0	0	0	0	0
Zotu1226	0	0	0	0	0	0	0	0	0	0	0	0	0	0	0	0	0	0	0	0	0	0	0	0	0	0	0	0	0	0	0	0	0	0	0	0	0	0	0	0	0	0	0	0	0	0	0	0	0
Zotu1227	0	0	0	0	0	0	0	0	0	0	0	0	0	0	0	0	0	0	0	0	0	0	0	0	0	0	0	0	0	0	0	0	0	0	0	0	0	0	0	0	0	0	0	0	0	0	0	0	0
Zotu1228	0	0	0	0	0	0	0	0	0	0	0	0	0	0	0	0	0	0	0	0	0	0	0	0	0	0	0	0	0	0	0	0	0	0	0	0	0	0	0	0	0	0	0	0	0	0	0	0	0
Zotu1229	0	0	0	0	0	0	0	0	0	0	0	0	0	0	0	0	0	0	0	0	0	0	0	0	0	0	0	0	0	0	0	0	0	0	0	0	0	0	0	0	0	0	0	0	0	0	0	0	0
Zotu123	0	0	0	3	0	0	0	0	0	0	0	183	0	0	0	0	0	3	0	0	0	0	0	0	0	0	0	0	0	0	0	0	0	0	1	0	0	0	0	3	6	0	0	0	0	0	0	0	0
Zotu1230	0	0	0	0	0	0	0	0	0	0	0	182	0	0	0	0	0	0	0	0	0	0	0	0	0	0	0	0	0	0	0	0	0	0	0	0	0	0	0	0	0	0	0	0	0	0	0	0	0
Zotu1231	0	0	0	0	0	0	0	0	0	0	0	0	0	0	0	0	0	0	0	0	0	0	0	0	0	0	0	0	0	0	0	0	0	0	0	0	0	0	0	0	0	0	0	0	0	0	0	0	0
Zotu1232	0	0	0	0	0	0	0	0	0	0	0	0	0	0	0	0	0	0	0	0	0	0	0	0	0	0	0	0	0	0	0	0	0	0	0	0	0	0	0	0	0	0	0	0	0	0	0	0	0
Zotu1233	0	0	0	0	0	0	0	0	0	0	0	0	0	0	0	0	0	0	0	0	0	0	0	0	0	0	0	0	0	0	0	0	0	0	0	0	0	0	0	0	0	0	0	0	0	0	0	0	0
Zotu1234	0	0	0	0	0	0	0	0	0	0	0	0	0	0	0	0	0	0	0	0	0	0	301	0	0	0	0	0	0	0	0	0	1	0	0	0	0	0	0	0	0	0	0	0	0	0	0	0	0
Zotu1235	0	0	0	0	0	0	0	0	0	0	0	0	0	0	0	0	0	0	0	0	0	0	0	0	0	0	0	0	0	0	0	0	0	0	0	0	0	0	0	0	0	0	0	0	0	0	0	0	0
Zotu1236	0	0	0	0	0	0	0	0	0	0	0	307	0	0	0	0	0	0	0	0	0	0	2	0	0	0	0	0	0	0	0	0	0	0	0	0	0	0	0	0	0	0	0	0	0	0	0	0	0
Zotu1237	0	0	0	0	0	0	0	0	0	0	0	0	0	0	0	0	0	0	0	0	0	0	0	0	0	0	0	0	0	0	0	0	0	0	0	0	0	0	0	0	0	0	0	0	0	0	0	0	0
Zotu1238	0	0	0	0	0	0	0	0	0	0	0	0	0	0	0	0	0	0	0	0	0	0	0	0	0	0	0	0	0	0	0	0	0	0	0	0	0	0	0	0	0	0	0	0	0	0	0	0	0
Zotu1239	0	0	0	0	0	0	0	0	0	0	0	0	0	0	0	0	0	0	0	0	0	0	0	0	0	0	0	0	0	0	0	0	0	0	0	0	0	0	0	0	0	0	0	0	0	0	0	0	0
Zotu124	0	1	0	0	0	0	1	0	0	0	0	0	0	0	0	0	3	0	0	0	0	0	0	0	1	1	0	56	90	0	0	0	0	0	0	0	0	0	0	0	0	0	0	1	0	0	0	0	0
Zotu1240	0	0	0	0	0	0	0	0	0	16	0	0	0	0	0	0	41	0	0	0	0	0	0	0	0	0	0	0	0	0	0	0	28	0	1	0	0	0	0	0	0	0	0	0	0	0	0	0	0
Zotu1241	0	0	0	0	0	0	0	0	0	0	0	0	0	0	0	0	0	0	0	0	0	0	0	0	0	0	0	0	0	0	0	0	0	0	0	0	0	0	0	0	0	0	0	0	0	0	0	0	0
Zotu1242	0	0	0	0	0	0	0	0	0	0	0	0	0	0	0	0	0	0	0	0	0	0	0	0	0	0	0	0	0	0	0	0	0	0	0	0	0	0	0	0	0	0	0	0	0	0	0	0	0
Zotu1243	0	0	0	0	0	0	0	0	0	0	0	0	0	0	0	0	0	0	0	0	0	0	0	0	0	0	0	0	0	0	0	0	0	0	0	0	0	0	0	0	0	0	0	0	0	0	0	0	0
Zotu1244	1	0	246	0	0	0	0	0	0	0	0	0	0	0	0	0	0	0	0	0	0	0	0	0	0	0	0	0	0	0	0	0	0	0	0	0	0	0	0	0	0	0	0	0	0	0	0	0	0
Zotu1245	0	0	0	0	0	0	0	0	0	21	0	0	0	0	0	0	0	1	0	0	0	0	0	0	0	0	1	0	0	0	0	0	34	0	0	0	0	0	0	0	0	0	0	0	0	1	0	0	0
Zotu1246	0	0	0	0	0	0	0	0	0	0	0	0	0	0	0	0	0	0	0	0	0	0	0	0	0	0	0	0	0	0	0	0	0	0	0	0	0	0	0	0	0	0	0	0	0	0	0	0	0
Zotu1247	0	0	0	0	0	0	0	0	0	0	0	0	0	0	0	0	0	0	0	0	0	0	0	0	0	0	0	0	0	0	0	0	0	0	0	0	0	0	0	0	0	0	0	0	0	0	0	0	0
Zotu1248	0	0	0	0	0	0	0	0	0	0	0	0	0	0	0	0	0	0	0	0	0	0	0	0	0	0	0	0	0	0	0	0	0	0	0	0	0	0	0	0	0	0	0	0	0	0	0	0	0
Zotu1249	0	0	0	0	0	0	0	0	0	0	0	0	0	0	0	0	0	0	0	0	0	0	0	0	0	0	0	0	0	0	0	0	0	0	0	0	0	0	0	0	0	0	0	0	0	0	0	0	0
Zotu125	0	2	0	0	0	0	0	1	0	0	0	0	0	5	0	0	0	0	0	0	0	0	0	0	3	0	0	0	0	0	0	0	0	0	0	0	0	0	0	3	0	0	0	0	0	0	0	0	0
Zotu1250	0	0	0	0	0	0	0	0	0	0	0	0	0	0	0	0	0	0	0	0	0	0	0	0	0	0	0	0	0	0	0	0	0	0	0	0	0	0	0	0	0	0	0	0	0	0	0	0	0
Zotu1251	0	0	0	0	0	0	0	0	0	0	0	0	0	0	0	0	0	0	0	0	0	0	0	0	0	0	0	0	0	0	0	0	0	0	0	0	0	0	0	0	0	0	0	0	0	0	0	0	0
Zotu1252	0	0	0	0	0	0	0	0	0	0	0	0	0	0	0	0	0	0	0	0	0	0	0	0	0	0	0	0	0	0	0	0	0	0	0	0	0	0	0	0	0	0	0	0	0	0	0	0	0
Zotu1253	0	0	0	0	0	0	0	0	0	0	0	0	0	0	0	0	0	0	0	0	0	0	0	0	0	0	0	0	0	0	0	0	0	0	0	0	0	0	0	0	0	0	0	0	0	0	0	0	0
Zotu1254	0	0	0	0	0	0	0	0	0	0	0	0	0	0	0	0	0	0	0	0	0	0	0	0	0	0	0	0	0	0	0	0	0	0	0	0	0	0	0	0	0	0	0	0	0	0	0	0	0
Zotu1255	0	0	0	0	0	0	0	0	0	0	0	0	0	0	0	0	0	0	0	0	0	0	0	0	0	0	0	0	0	0	0	0	0	0	0	0	0	0	0	0	0	0	0	0	0	0	0	0	0
Zotu1256	0	0	0	0	0	0	0	0	0	0	0	0	0	0	0	0	0	0	0	0	0	0	0	0	0	0	0	0	0	0	0	0	0	0	0	0	0	0	0	0	0	0	0	0	0	0	0	0	0
Zotu1257	0	0	0	0	0	0	0	0	0	0	0	0	0	0	0	0	0	0	0	0	0	0	0	0	0	0	0	0	0	0	0	0	0	0	0	0	0	0	0	0	0	0	0	0	0	0	0	0	0
Zotu1258	0	0	0	0	0	0	0	0	0	0	0	0	0	0	0	0	0	0	0	0	0	0	0	0	0	0	0	0	0	0	0	0	0	0	0	0	0	0	0	0	0	0	0	0	0	0	0	0	0
Zotu1259	0	0	0	0	0	0	0	0	0	0	0	0	0	0	0	0	0	0	0	0	0	0	0	0	0	0	0	0	0	0	0	0	0	0	0	0	0	0	0	0	0	0	0	0	0	0	0	0	0
Zotu126	0	0	0	0	153	1	0	0	0	0	0	0	0	0	1	0	2169	19	0	0	0	0	1	0	0	0	2	3	2	0	1	0	2	0	2	0	0	0	0	0	0	0	0	1	0	0	0	0	0
Zotu1260	0	0	0	0	0	0	0	0	0	0	0	0	0	0	0	0	0	0	0	0	0	0	0	0	0	0	0	0	0	0	0	0	0	0	0	0	0	0	0	0	0	0	0	0	0	0	0	0	0
Zotu1261	0	0	0	0	0	0	0	0	0	0	0	0	0	0	0	0	0	0	0	0	0	0	0	0	0	0	0	0	0	0	0	0	0	0	0	0	0	0	0	0	0	0	0	0	0	0	0	0	0
Zotu1262	0	0	0	0	0	0	0	0	0	0	0	0	0	0	0	0	0	0	0	0	0	0	0	0	0	0	0	0	0	0	0	0	0	0	0	0	0	0	0	0	0	0	0	0	0	0	0	0	0
Zotu1263	0	0	0	0	0	0	0	0	0	0	0	0	0	0	0	0	0	0	0	0	0	0	0	0	0	0	0	0	0	0	0	0	0	0	0	0	0	0	0	0	0	0	0	0	0	0	0	0	0
Zotu1264	0	0	0	0	0	0	0	0	0	0	0	0	0	0	0	0	0	0	0	0	0	0	0	0	0	0	0	0	0	0	0	0	0	0	0	0	0	0	0	0	0	0	0	0	0	0	0	0	0
Zotu1265	0	0	0	0	0	0	0	0	0	0	0	0	0	0	0	0	0	0	0	0	0	0	0	0	0	0	0	0	0	0	0	0	0	0	0	0	0	0	0	0	0	0	0	0	0	0	0	0	0
Zotu1266	0	0	0	0	0	0	0	0	0	0	0	0	0	0	0	0	0	0	0	0	0	0	0	0	0	0	0	0	0	0	0	0	0	0	0	0	0	0	0	0	0	0	0	0	0	0	0	0	0
Zotu1267	0	0	0	0	0	0	0	0	325	0	0	0	0	0	0	0	0	0	0	0	0	0	0	0	0	0	0	0	0	0	0	0	0	0	0	0	0	0	0	0	0	0	0	0	0	0	0	0	0
Zotu1268	0	0	0	0	0	0	0	0	0	0	0	0	0	0	0	0	0	0	0	0	0	0	0	0	0	0	0	0	3	0	0	0	0	0	0	0	0	0	0	0	0	0	0	0	0	0	0	0	0
Zotu1269	0	0	0	0	0	0	0	0	0	0	0	0	0	0	0	0	0	0	0	0	0	0	0	0	0	0	0	0	0	0	0	0	0	0	0	0	0	0	0	0	0	0	0	0	0	0	0	0	0
Zotu127	0	0	0	1	0	0	0	0	0	0	0	0	0	0	0	0	0	11	0	0	0	0	0	0	0	0	147	0	1	0	0	0	0	0	0	0	1	0	0	0	0	1	1	0	0	0	0	0	0
Zotu1270	0	0	0	0	0	0	0	0	0	0	0	0	0	0	0	0	0	0	0	0	0	0	0	0	0	0	0	0	0	0	0	0	0	0	0	0	0	0	0	0	0	0	0	0	0	0	0	0	0
Zotu1271	0	0	0	0	0	0	0	0	0	0	0	0	0	0	0	0	0	0	0	0	0	0	0	0	0	0	0	0	0	0	0	0	0	0	0	0	0	0	0	0	0	0	0	0	0	0	0	0	0
Zotu1272	0	0	0	0	0	0	0	0	0	0	0	0	0	0	0	0	0	0	0	0	0	0	0	0	0	0	0	0	0	0	0	0	0	0	0	0	0	0	0	0	0	0	0	0	0	0	0	0	0
Zotu1273	0	0	0	0	0	0	0	0	0	0	0	0	0	0	0	0	0	0	0	0	0	0	0	0	0	0	0	0	0	0	0	0	0	0	0	0	0	0	0	0	0	0	0	0	0	0	0	0	0
Zotu1274	0	0	0	0	0	0	0	0	0	0	0	0	0	0	0	0	0	0	0	0	0	0	0	0	0	0	0	0	0	0	0	0	0	0	0	0	0	0	0	0	0	0	0	0	0	0	0	0	0
Zotu1275	0	0	0	0	0	0	0	0	0	0	0	0	0	0	0	0	0	0	0	0	0	0	0	0	0	0	0	0	0	0	0	0	0	0	0	0	0	0	0	0	0	0	0	0	0	0	0	0	0
Zotu1276	0	0	0	0	0	0	0	0	0	0	0	0	0	0	0	0	0	0	0	0	0	0	0	0	0	0	0	0	0	0	0	0	0	0	0	0	0	0	0	0	0	0	0	0	0	0	0	0	0
Zotu1277	0	0	0	0	0	0	0	0	0	0	0	0	0	0	0	0	0	0	0	0	0	0	0	0	0	0	0	0	0	0	0	0	0	0	0	0	0	0	0	0	0	0	0	0	0	0	0	0	0
Zotu1278	0	0	215	0	0	0	0	0	0	0	0	0	0	0	0	0	0	0	0	0	0	0	0	0	0	1	0	0	0	0	0	0	0	0	0	0	0	0	0	0	0	0	0	0	0	0	0	0	0
Zotu1279	0	0	0	0	0	0	0	0	0	0	0	0	0	0	0	0	0	0	0	0	0	0	0	0	0	0	0	0	13	0	0	0	0	0	0	0	0	0	2	0	0	0	0	0	0	0	0	0	0
Zotu128	165	0	0	0	0	0	0	2	0	0	0	0	0	0	0	0	0	0	1	0	0	0	0	0	0	0	0	0	0	0	1	1	0	0	0	0	0	0	0	0	0	0	0	2	0	3	0	1	0
Zotu1280	0	0	0	0	0	0	0	0	0	0	0	0	0	0	0	0	0	0	0	0	0	0	0	0	0	0	0	0	0	0	0	0	0	0	0	0	0	0	0	0	0	0	0	0	0	0	0	0	0
Zotu1281	0	0	0	0	0	0	0	0	0	0	0	0	0	0	0	0	0	0	0	0	0	0	0	0	0	0	0	0	0	0	0	0	0	0	0	0	0	0	0	0	0	0	0	0	0	0	0	0	0
Zotu1282	0	0	0	0	0	0	0	0	0	0	0	0	0	0	0	0	0	0	0	0	0	0	0	0	0	0	0	0	0	0	0	0	0	0	0	0	0	0	0	0	0	0	0	0	0	0	0	0	0
Zotu1283	0	0	0	0	0	0	0	0	0	0	0	0	0	0	0	0	0	0	0	0	0	0	0	0	0	0	0	0	0	0	0	0	0	0	0	0	0	0	0	0	0	0	0	0	0	0	0	0	0
Zotu1284	0	0	0	0	0	0	0	0	0	0	0	0	0	0	0	0	0	0	0	0	0	0	0	0	0	0	0	0	0	0	0	0	0	0	0	0	0	0	0	0	0	0	0	0	0	0	0	0	0
Zotu1285	0	0	0	0	0	2	0	0	0	0	0	0	0	0	0	0	0	0	0	0	0	0	0	0	0	0	0	0	5	0	0	0	0	0	0	0	0	0	1	0	0	0	0	0	0	0	0	0	0
Zotu1286	0	0	0	0	0	0	0	0	0	0	0	0	0	0	0	0	0	0	0	0	0	0	0	0	0	0	0	0	0	0	0	0	0	0	0	0	0	0	0	0	0	0	0	0	0	0	0	0	0
Zotu1287	0	0	0	0	0	0	0	0	0	0	0	0	0	0	0	0	0	0	0	0	0	0	0	0	0	0	0	0	0	0	0	0	0	0	0	0	0	0	0	0	0	0	0	0	0	0	0	0	0
Zotu1288	0	0	0	0	0	0	0	0	0	0	0	0	0	0	0	0	0	0	0	0	0	0	0	0	0	0	0	0	0	0	0	0	0	0	0	0	0	0	0	0	0	0	0	0	0	0	0	0	0
Zotu1289	0	0	0	0	0	0	0	0	0	0	0	0	0	0	0	0	0	0	0	0	0	0	0	0	0	0	0	0	0	0	0	0	0	0	0	0	0	0	0	0	0	0	0	0	0	0	0	0	0
Zotu129	0	0	0	0	0	0	0	0	0	0	0	0	0	0	0	0	0	20	0	0	0	0	0	0	0	0	0	0	0	0	0	0	0	0	0	0	0	0	0	0	0	0	0	0	0	0	0	0	0
Zotu1290	0	0	0	0	0	0	0	0	0	0	0	0	0	0	0	0	0	0	0	0	0	0	0	0	0	0	0	0	0	0	0	0	0	0	0	0	0	0	0	0	0	0	0	0	0	0	0	0	0
Zotu1291	0	0	0	0	0	0	3	0	0	0	0	0	0	0	0	0	0	2	0	0	0	0	0	0	0	0	0	0	0	0	0	0	0	0	0	0	0	0	0	0	0	0	0	0	0	0	0	0	0
Zotu1292	0	0	0	0	0	0	0	0	0	0	0	0	0	0	0	0	0	0	0	0	0	0	0	0	0	0	0	0	0	0	0	0	0	0	0	0	0	0	0	0	0	0	0	0	0	0	0	0	0
Zotu1293	0	0	0	0	0	0	0	0	0	0	0	0	0	0	0	0	0	0	0	0	0	0	0	0	0	0	0	0	0	0	0	0	0	0	0	0	0	0	0	0	0	0	0	0	0	0	0	0	0
Zotu1294	0	0	0	0	0	0	0	0	0	0	0	0	0	0	0	0	0	0	0	0	0	0	0	0	0	0	0	0	0	0	0	0	0	0	0	0	0	0	0	0	0	0	0	0	0	0	0	0	0
Zotu1295	0	0	0	0	0	0	0	0	0	0	0	0	0	0	0	0	0	0	0	0	0	0	0	0	0	0	0	0	0	0	0	0	0	0	0	0	0	0	0	0	0	0	0	0	0	0	0	0	0
Zotu1296	0	0	0	0	0	0	0	0	0	0	0	0	0	0	0	0	0	0	0	0	0	0	0	0	0	0	0	0	0	0	0	0	0	0	0	0	0	0	0	0	0	0	0	0	0	0	0	0	0
Zotu1297	0	0	0	0	0	0	0	0	0	0	0	0	0	0	0	0	0	0	0	0	0	0	0	0	0	0	0	0	0	0	0	0	0	0	0	0	0	0	0	0	0	0	0	0	0	0	0	0	0
Zotu1298	0	0	0	0	0	0	0	0	0	0	0	0	0	0	0	0	0	0	0	0	0	0	0	0	0	0	0	0	0	0	0	0	0	0	0	0	0	0	0	0	0	0	0	0	0	0	0	0	0
Zotu1299	0	0	0	0	0	0	0	0	0	0	0	0	0	0	0	0	1	0	0	0	0	0	0	0	0	0	0	0	0	0	0	0	0	0	0	0	0	0	0	0	0	0	0	0	0	0	0	0	0
Zotu13	71	801	682	175	498	0	1	1	0	0	0	0	0	5	2	0	206	384	0	218	1	88	1	0	0	2	0	2	9	1	0	0	0	0	3	0	1	1	1	8	3	1	1	0	0	0	0	0	0
Zotu130	0	0	0	0	0	0	0	0	0	0	0	0	0	0	0	0	0	0	0	0	0	0	0	0	0	0	0	0	0	0	0	0	0	0	0	0	0	0	0	0	0	0	0	0	0	0	0	0	0
Zotu1300	0	0	0	0	0	0	0	0	0	0	0	0	0	0	0	0	0	0	0	0	0	0	0	0	0	0	0	0	0	0	0	0	0	0	0	0	0	0	0	0	0	0	0	0	0	0	0	0	0
Zotu1301	0	0	0	0	0	0	0	0	0	0	0	0	0	0	0	0	0	0	0	0	0	0	0	0	0	0	0	0	0	0	0	0	0	0	0	0	0	0	0	0	0	0	0	0	0	0	0	0	0
Zotu1302	0	0	0	0	0	0	0	0	0	0	0	0	0	0	0	0	0	0	0	0	0	0	0	0	0	0	0	0	0	0	0	0	0	0	0	0	0	0	0	0	0	0	0	0	0	0	0	0	0
Zotu1303	0	0	0	0	0	0	0	0	0	0	0	0	0	0	0	0	0	0	0	0	0	0	0	0	0	0	0	0	0	0	0	0	0	0	0	0	0	0	0	0	0	0	0	0	0	0	0	0	0
Zotu1304	0	0	0	0	0	0	0	0	0	0	0	0	0	0	0	0	0	0	0	0	0	0	0	0	0	0	0	0	0	0	0	0	0	0	0	0	0	0	0	0	0	0	0	0	0	0	0	0	0
Zotu1305	0	0	0	0	0	0	0	0	0	0	0	0	0	0	0	0	0	0	0	0	0	0	0	0	0	0	0	0	0	0	0	0	0	0	0	0	0	0	0	0	0	0	0	0	0	0	0	0	0
Zotu1306	0	0	0	0	0	0	0	0	0	0	0	0	0	0	0	0	0	0	0	0	0	0	0	0	0	0	0	0	0	0	0	0	0	0	0	0	0	0	0	0	0	0	0	0	0	0	0	0	0
Zotu1307	0	0	0	0	0	0	0	0	1	0	0	0	0	0	0	0	0	0	0	0	0	0	0	0	0	0	0	0	0	0	0	0	0	0	0	0	0	0	0	0	0	0	0	0	0	0	0	0	0
Zotu1308	0	0	0	0	0	0	0	0	0	0	0	0	0	0	0	0	0	0	0	0	0	0	0	0	0	0	0	0	0	0	0	0	0	0	0	0	0	0	0	0	0	0	0	0	0	0	0	0	1
Zotu1309	0	0	0	0	0	0	0	0	0	0	0	0	0	0	0	0	0	0	0	0	0	0	0	0	0	0	0	0	0	0	0	0	0	0	0	0	0	0	0	0	0	0	0	0	0	0	0	0	0
Zotu131	0	0	0	0	0	0	0	0	0	0	0	0	0	0	0	0	0	0	0	0	0	0	0	0	0	0	0	0	18	0	0	0	0	0	0	0	0	0	0	0	0	0	0	1	1	0	0	0	0
Zotu1310	0	0	0	0	0	0	0	0	0	0	0	0	0	0	0	0	0	0	0	0	0	0	0	0	0	0	0	0	0	0	0	0	0	0	0	0	0	0	0	0	0	0	0	0	0	0	0	0	0
Zotu1311	0	0	0	0	0	0	0	0	0	0	0	0	0	0	0	0	0	0	0	0	0	0	0	0	0	0	0	0	0	0	0	0	0	0	0	0	0	0	0	0	0	0	0	0	0	0	0	0	0
Zotu1312	0	0	0	0	1	0	0	0	0	0	0	0	1	0	0	0	0	0	0	0	0	0	0	0	0	0	0	0	0	0	0	0	0	0	0	0	0	2	0	0	0	0	0	0	0	0	0	0	0
Zotu1313	0	0	0	0	0	0	0	0	0	0	0	0	0	0	0	0	0	0	0	0	0	0	0	0	0	0	0	0	0	0	0	0	0	0	0	0	0	0	0	0	0	0	0	0	0	0	0	0	0
Zotu1314	0	0	0	0	0	0	0	0	0	0	0	0	0	0	0	0	0	0	0	0	0	0	0	0	0	0	0	0	0	0	0	0	0	0	0	0	0	0	0	0	0	0	0	0	0	0	0	0	0
Zotu1315	0	0	0	0	0	0	0	0	0	0	0	0	0	0	0	0	0	0	0	0	0	0	0	0	0	0	0	0	0	0	0	0	0	0	0	0	0	0	0	0	0	0	0	0	0	0	0	0	0
Zotu1316	0	0	0	0	0	0	0	0	0	0	0	0	0	0	0	0	0	0	0	0	0	0	0	0	0	0	0	0	0	0	0	0	0	0	0	0	0	0	0	0	0	0	0	0	0	0	0	0	0
Zotu1317	0	0	0	0	0	0	0	0	0	0	0	0	0	0	0	0	0	0	0	0	0	0	0	0	0	0	0	0	0	0	0	0	0	0	0	0	0	0	0	0	0	0	0	0	0	0	0	0	0
Zotu1318	0	0	0	0	0	0	0	308	1	0	0	0	0	0	0	0	0	0	0	0	0	0	0	0	0	0	0	0	0	0	1	0	0	0	0	0	0	0	0	0	0	0	0	0	0	0	0	0	0
Zotu1319	0	0	0	0	0	0	0	0	0	0	0	0	0	0	0	0	0	0	0	0	0	0	0	0	0	0	0	0	54	0	0	1	0	0	0	0	0	0	0	0	0	0	0	0	0	0	0	0	0
Zotu132	0	0	62	0	0	5	0	0	0	0	0	0	0	0	0	0	0	4	0	0	0	1	251	0	0	1	0	915	0	0	0	120	1	0	1	0	0	0	3	2	0	0	1	0	0	0	0	0	0
Zotu1320	0	0	0	0	0	0	0	0	0	0	0	0	0	0	0	0	0	0	0	0	0	0	0	0	0	0	0	0	0	0	0	0	0	0	0	0	0	0	0	0	0	0	0	0	0	0	0	0	0
Zotu1321	0	0	0	0	0	0	0	0	0	0	0	0	0	0	0	0	0	0	0	0	0	0	0	0	0	0	0	0	0	0	0	0	0	0	0	0	0	0	1	0	0	0	0	0	0	0	0	0	0
Zotu1322	0	0	0	0	287	0	0	0	0	0	0	0	0	0	1	0	0	0	0	0	0	0	0	0	0	0	0	0	0	0	0	0	0	0	0	0	0	0	0	0	0	0	0	0	0	0	0	0	0
Zotu1323	0	0	0	0	0	0	2	0	0	0	0	0	0	0	0	0	0	0	0	0	0	0	0	0	0	0	0	0	0	0	0	0	0	0	0	0	0	0	0	0	0	0	0	0	0	0	0	0	0
Zotu1324	0	0	0	0	0	0	0	0	0	0	0	0	0	0	0	0	0	0	0	0	0	0	0	0	0	0	0	0	0	0	0	0	0	0	0	0	0	0	0	0	0	0	0	0	0	0	0	0	0
Zotu1325	0	0	0	0	0	0	0	0	0	0	0	0	0	0	0	0	0	0	0	0	0	0	0	0	0	0	0	0	0	0	0	0	0	0	0	0	0	0	0	0	0	0	0	0	0	0	0	0	0
Zotu1326	0	0	0	0	0	0	0	0	0	0	0	0	0	0	0	0	0	0	0	0	0	0	0	0	0	0	0	0	0	0	0	0	0	0	0	0	0	0	0	0	0	0	0	0	0	0	0	0	0
Zotu1327	0	0	0	0	0	0	0	0	0	0	0	0	0	0	0	0	0	0	0	0	0	0	0	0	0	0	0	0	0	0	0	0	0	0	0	0	0	0	0	0	0	0	0	0	0	0	0	0	0
Zotu1328	0	0	0	0	0	0	0	0	0	0	0	0	0	0	0	0	0	0	0	0	0	0	0	0	0	0	0	0	0	0	0	0	0	0	0	0	0	0	0	0	0	0	0	0	0	0	0	0	0
Zotu1329	0	0	0	0	0	0	0	0	0	0	0	0	0	0	0	0	0	0	0	0	0	0	0	0	0	0	0	0	0	0	0	0	0	0	0	0	0	0	0	0	0	0	0	0	0	0	0	0	0
Zotu133	0	0	0	0	0	0	0	0	0	0	0	0	0	0	0	0	0	0	0	0	0	0	261	0	0	0	0	0	6	0	0	0	0	1	0	0	0	1	0	0	0	0	0	0	0	2	0	0	0
Zotu1330	0	0	0	0	0	0	0	0	0	0	0	0	0	0	0	0	0	0	0	0	0	0	0	0	0	0	0	0	0	0	0	0	0	0	0	0	0	0	0	0	0	0	0	0	0	0	0	0	0
Zotu1331	0	0	0	0	0	0	0	0	0	0	0	0	0	0	0	0	0	0	0	0	0	0	0	0	0	0	0	0	0	0	0	0	0	0	0	0	0	0	0	0	0	0	0	0	0	0	0	0	0
Zotu1332	0	0	0	0	0	0	0	0	0	0	0	0	0	0	0	0	0	0	0	0	0	0	0	0	0	0	0	0	0	0	0	0	0	0	0	0	0	0	0	0	0	0	0	0	0	0	0	0	0
Zotu1333	0	0	0	0	0	0	0	0	0	0	0	0	0	0	0	0	0	0	0	0	0	0	0	0	0	0	0	0	0	0	0	0	0	0	0	0	0	0	0	0	0	0	0	0	0	0	0	0	0
Zotu1334	0	0	0	0	0	0	0	0	0	0	0	0	0	0	0	0	0	0	0	0	0	0	0	0	0	0	0	0	0	0	0	1	0	0	0	0	0	0	0	0	0	0	0	0	0	0	0	0	0
Zotu1335	0	0	0	0	0	0	0	0	0	0	0	0	0	0	0	0	0	0	0	0	0	0	0	0	0	0	0	0	0	0	0	0	0	0	0	0	0	0	0	0	0	0	0	0	0	0	0	0	0
Zotu1336	0	0	0	0	0	0	0	0	0	0	0	0	0	0	0	0	0	0	0	0	0	0	0	0	0	0	0	0	0	0	0	0	0	0	0	0	0	0	0	0	0	0	0	0	0	0	0	0	0
Zotu1337	0	0	0	0	0	0	0	0	0	0	0	0	0	0	0	0	0	0	0	0	0	0	0	0	0	0	0	0	0	0	0	0	0	0	0	0	0	0	0	0	0	0	0	0	0	0	0	0	0
Zotu1338	0	0	0	0	0	0	0	0	0	0	0	0	0	0	0	0	0	0	0	0	0	0	0	0	0	0	0	0	0	0	0	0	0	0	0	0	0	0	0	0	0	0	0	0	0	0	0	0	0
Zotu1339	0	0	0	0	0	0	0	0	0	0	0	0	0	0	0	0	0	0	0	0	0	0	0	0	0	0	0	0	0	0	0	0	0	0	0	0	0	0	0	0	0	0	0	0	0	0	0	0	0
Zotu134	0	0	1	0	0	0	0	0	0	1	0	0	0	0	0	0	0	0	4	0	0	0	516	0	0	0	0	0	0	0	0	0	4	0	0	0	0	1	0	0	0	0	0	0	0	509	0	1	1
Zotu1340	0	0	0	0	0	0	0	0	0	0	0	0	0	0	0	0	0	0	0	0	0	0	0	0	0	0	0	0	0	0	0	0	0	0	0	0	0	0	0	1	1	0	0	0	0	0	0	0	0
Zotu1341	0	0	0	0	0	0	0	0	0	0	0	0	0	0	0	0	0	0	0	0	0	0	0	0	0	0	0	0	0	0	0	0	0	0	0	0	0	0	0	0	0	0	0	0	0	0	0	0	0
Zotu1342	0	0	0	0	0	0	0	0	0	0	0	0	0	0	0	0	0	0	0	0	0	0	0	0	0	0	0	0	0	0	0	0	0	0	0	0	0	0	0	0	0	0	0	0	0	0	0	0	0
Zotu1343	0	0	0	0	0	0	0	0	0	0	0	0	0	0	0	0	0	0	0	0	0	0	0	0	0	0	0	0	0	0	0	0	0	0	0	0	0	0	0	0	0	0	0	0	0	0	0	0	0
Zotu1344	0	0	0	0	0	0	0	0	0	0	0	0	0	0	0	0	0	21	0	0	0	0	0	0	0	0	0	0	0	0	0	0	0	0	0	0	0	0	0	0	0	0	0	0	0	0	0	0	0
Zotu1345	0	0	0	0	0	0	0	0	0	0	0	0	0	0	0	0	0	0	0	0	0	0	0	0	0	0	0	0	0	0	0	0	0	0	0	0	0	0	0	0	0	0	0	0	0	0	0	0	0
Zotu1346	0	0	0	0	0	0	0	0	0	0	0	0	0	0	0	0	0	0	0	0	0	0	0	0	0	0	0	0	0	0	0	0	0	0	0	0	0	0	0	0	0	0	0	0	0	0	0	0	0
Zotu1347	0	0	0	0	0	0	0	0	0	0	0	0	0	0	0	0	0	0	0	0	0	0	0	0	0	0	0	0	0	0	0	0	0	0	0	0	0	0	0	0	0	0	0	0	0	0	0	0	0
Zotu1348	0	0	0	0	0	0	0	0	0	0	0	0	0	0	0	0	0	0	0	0	0	0	0	0	0	0	0	0	0	0	0	0	0	0	0	0	0	0	0	0	0	0	0	0	0	0	0	0	0
Zotu1349	0	0	0	0	0	0	0	0	0	0	0	0	0	0	0	0	0	0	0	0	0	0	0	0	0	0	0	0	0	0	0	0	0	0	0	0	0	0	0	0	0	0	0	0	0	0	0	0	0
Zotu135	0	0	0	0	1	0	0	0	0	1	0	0	0	0	1	0	1	20	0	1	0	0	0	0	0	0	0	0	1	0	0	0	0	0	1	0	0	0	0	2	0	0	0	1	0	1	0	0	0
Zotu1350	0	0	0	0	0	0	0	0	0	0	0	0	0	0	0	0	0	0	0	0	0	0	0	0	0	0	0	0	0	0	0	0	0	0	0	0	0	0	0	0	0	0	0	0	0	0	0	0	0
Zotu1351	0	0	1	0	0	0	0	0	0	0	0	0	0	0	0	0	0	0	0	0	0	0	0	0	0	0	0	0	0	0	0	0	0	0	0	0	0	0	0	0	0	0	0	0	0	0	0	0	0
Zotu1352	0	0	0	0	0	0	0	0	0	0	0	0	0	0	0	0	0	0	0	0	0	0	0	0	0	0	0	0	0	0	0	0	0	0	0	0	0	0	0	0	0	0	0	0	0	0	0	0	0
Zotu1353	0	0	0	0	0	0	0	0	0	0	0	0	0	0	0	0	0	0	0	0	0	0	0	0	0	0	0	0	0	0	0	0	0	0	0	0	0	0	0	0	0	0	0	0	0	0	0	0	0
Zotu1354	0	0	0	0	0	0	0	0	0	0	0	0	0	0	0	0	0	0	0	0	0	0	0	0	0	0	0	0	0	0	0	0	0	0	0	0	0	0	0	0	0	0	0	0	0	0	0	0	0
Zotu1355	0	0	0	0	0	0	0	0	0	0	0	0	0	0	0	0	0	0	0	0	0	0	0	0	0	0	0	0	0	0	0	0	0	0	0	0	0	0	0	0	0	0	0	0	0	0	0	0	0
Zotu1356	0	0	0	0	0	0	0	0	0	0	0	0	0	0	0	0	0	0	0	0	0	0	0	0	0	1	0	0	0	0	0	0	0	0	0	0	0	0	0	0	0	0	0	0	0	0	0	0	0
Zotu1357	0	0	0	0	0	0	0	0	0	0	0	0	0	0	0	0	0	0	0	0	0	0	0	0	0	0	0	0	0	0	0	0	0	0	0	0	0	0	0	0	0	0	0	0	0	0	0	0	0
Zotu1358	0	0	0	0	0	0	0	0	0	0	0	0	0	0	0	0	0	0	0	0	0	0	0	0	0	0	0	27	0	0	0	0	0	0	0	0	0	0	0	0	0	0	0	0	0	0	0	0	0
Zotu1359	0	0	0	0	0	0	0	0	0	0	0	0	0	0	0	0	0	0	0	0	0	0	0	0	0	0	0	0	0	0	0	0	0	0	0	0	0	0	0	0	0	0	0	0	0	0	0	0	0
Zotu136	0	0	0	0	0	0	0	0	0	0	0	0	0	0	0	0	0	0	0	0	0	0	0	0	0	0	0	0	0	0	0	0	0	0	0	0	0	0	0	0	0	0	0	0	0	0	0	0	0
Zotu1360	0	0	0	0	0	0	0	0	0	0	0	0	0	0	0	0	0	0	0	0	0	0	0	0	0	0	0	0	0	0	0	0	0	0	0	0	0	0	0	0	0	0	0	0	0	0	0	0	0
Zotu1361	0	0	0	0	0	0	0	0	0	0	0	0	0	0	0	0	0	0	0	0	0	0	0	0	0	0	0	0	0	0	0	0	0	0	0	0	0	0	0	0	0	0	0	0	0	0	0	0	0
Zotu1362	0	0	0	0	0	1	0	0	0	0	0	0	0	0	0	0	0	0	0	0	0	0	0	0	0	0	0	0	0	0	0	0	0	0	0	0	0	0	1	0	0	0	0	0	0	0	0	0	0
Zotu1363	0	0	0	0	0	0	0	0	0	0	0	0	0	0	0	0	0	0	0	0	0	0	0	0	0	0	0	0	0	0	0	0	0	0	0	0	0	0	0	0	0	0	0	0	0	0	0	0	0
Zotu1364	0	0	0	0	0	0	0	0	0	0	0	0	0	0	0	0	0	0	0	0	0	0	0	0	0	0	0	0	0	0	0	0	0	0	0	0	0	0	0	0	0	0	0	0	0	0	0	0	0
Zotu1365	0	0	0	0	0	0	0	0	0	0	0	0	0	0	0	0	0	0	0	0	0	0	0	0	0	0	0	0	0	0	0	0	0	0	0	0	0	0	0	0	0	0	0	0	0	0	0	0	0
Zotu1366	0	0	0	0	0	0	0	0	0	0	0	0	0	0	0	0	0	0	0	0	0	0	0	0	0	0	0	0	0	0	0	0	0	0	0	0	0	0	0	0	0	0	0	0	0	0	0	0	0
Zotu1367	0	0	0	0	0	0	0	0	0	0	0	0	0	0	0	0	0	0	0	0	0	0	0	0	0	0	0	0	0	0	0	0	0	0	0	0	0	0	0	0	0	0	0	0	0	0	0	0	0
Zotu1368	0	0	0	0	0	0	0	0	0	0	0	0	0	0	0	0	0	0	0	0	0	0	0	0	0	0	0	0	0	0	0	0	0	0	0	0	0	0	0	0	0	0	0	0	0	1	0	0	0
Zotu1369	0	0	0	0	0	0	0	0	0	0	0	0	0	0	0	0	0	0	0	0	0	0	0	0	0	0	0	0	0	0	0	0	0	0	0	0	0	0	0	0	0	0	0	0	0	0	0	0	0
Zotu137	0	0	0	0	0	0	0	0	0	0	0	2	0	0	0	0	0	0	0	0	0	0	114	0	0	0	0	0	0	0	0	0	0	0	0	0	0	0	0	0	0	0	0	0	0	0	0	0	0
Zotu1370	0	0	0	0	0	0	0	0	0	0	0	0	0	0	0	0	0	0	0	0	0	0	0	0	0	0	0	0	0	0	0	0	0	0	0	0	0	0	0	0	0	0	0	0	0	0	0	0	0
Zotu1371	0	0	0	0	0	0	0	0	0	0	0	0	0	0	0	0	0	0	0	0	0	0	0	0	0	0	0	0	0	0	0	0	0	0	0	0	0	0	0	0	0	0	0	0	0	0	0	0	0
Zotu1372	0	0	0	0	0	0	0	0	0	0	0	0	0	0	0	0	0	0	0	0	0	0	0	0	0	0	0	1	0	0	0	0	0	0	0	0	0	0	0	0	0	0	0	0	0	0	0	0	0
Zotu1373	0	0	0	0	0	0	0	0	0	0	0	0	0	0	0	0	0	0	0	0	0	0	0	0	0	0	0	0	0	0	0	0	0	0	0	0	0	0	0	0	0	0	0	0	0	0	0	0	0
Zotu1374	0	0	0	0	0	0	0	0	0	0	0	0	0	0	0	0	0	0	0	0	0	0	0	0	0	0	0	0	35	0	0	0	0	0	0	0	0	0	0	0	0	0	0	0	0	0	0	0	0
Zotu1375	0	0	0	0	0	0	0	0	0	0	0	0	0	0	0	0	0	0	0	0	0	0	0	0	0	0	0	0	0	0	0	0	0	0	0	0	0	0	0	0	0	0	0	0	0	0	0	0	0
Zotu1376	0	0	0	0	0	0	0	0	0	0	0	0	0	0	0	0	0	0	0	0	0	0	0	0	0	0	0	0	0	0	0	0	0	0	0	0	0	0	0	0	0	0	0	0	0	0	0	0	0
Zotu1377	0	0	0	0	0	0	0	0	0	0	0	0	0	0	0	0	0	0	0	0	0	0	0	0	0	0	0	0	0	0	0	0	0	0	0	0	0	0	0	0	0	0	0	0	0	0	0	0	0
Zotu1378	0	0	0	0	0	0	0	0	0	0	0	0	0	0	0	0	0	0	0	0	0	0	0	0	0	0	0	0	0	0	0	0	0	0	0	0	0	0	0	0	0	0	0	0	0	0	0	0	0
Zotu1379	0	0	0	0	0	0	0	0	0	0	0	0	0	0	0	0	0	0	0	0	0	0	0	0	0	0	0	0	0	0	0	0	0	0	0	0	0	0	0	0	0	0	0	0	0	0	0	0	0
Zotu138	0	0	0	0	2	0	0	0	0	0	0	0	0	0	0	0	0	0	0	0	0	3813	0	0	0	0	0	0	0	0	0	0	0	0	0	0	0	0	0	0	0	0	0	0	0	0	0	0	0
Zotu1380	0	0	0	0	0	0	0	0	0	0	0	0	0	0	0	0	0	0	0	0	0	0	0	0	0	0	0	0	0	0	0	0	0	0	0	0	0	0	0	0	0	0	0	0	0	0	0	0	0
Zotu1381	0	0	0	0	0	0	0	0	0	0	0	0	0	0	0	0	0	0	0	0	0	0	0	0	0	0	0	0	0	0	0	0	0	0	0	0	0	0	0	0	0	0	0	0	0	0	0	0	0
Zotu1382	0	0	0	0	0	0	0	0	0	0	0	0	0	0	0	0	0	0	0	0	0	0	0	0	0	0	0	0	0	0	0	0	0	0	0	0	0	0	0	0	0	0	0	0	0	0	0	0	0
Zotu1383	0	0	0	0	0	0	0	0	0	0	0	0	0	0	0	0	0	0	0	0	0	0	0	0	0	0	0	0	0	0	0	0	0	0	0	0	0	0	0	0	0	0	0	0	0	0	0	0	0
Zotu1384	0	0	0	0	0	0	0	0	0	0	0	0	0	0	0	0	0	0	0	0	0	0	0	0	0	0	0	0	0	0	0	0	0	0	0	0	0	0	0	0	0	0	0	0	0	0	0	0	0
Zotu1385	0	0	0	0	0	0	0	0	0	0	0	0	0	0	0	0	0	0	0	0	0	0	0	0	0	0	0	0	0	0	0	0	0	0	0	0	0	0	0	0	0	0	0	0	0	0	0	0	0
Zotu1386	0	0	0	0	0	0	0	0	0	0	0	0	0	0	0	0	0	0	0	0	0	0	0	0	0	0	0	0	0	0	0	0	0	0	0	0	0	0	0	0	0	0	0	0	0	0	0	0	0
Zotu1387	0	0	0	0	0	0	0	0	0	0	0	0	0	0	0	0	0	0	0	0	0	0	0	0	0	0	0	0	0	0	0	0	0	0	0	0	0	0	0	0	0	0	0	0	0	0	0	0	0
Zotu1388	0	0	0	0	0	0	0	0	0	0	0	0	0	0	0	0	0	0	0	0	0	0	0	0	0	0	0	0	0	0	0	0	0	0	0	0	1	0	0	0	0	0	0	0	0	0	0	0	0
Zotu1389	0	0	0	0	0	0	0	0	0	0	0	0	0	0	0	0	0	0	0	0	0	0	0	0	0	0	0	0	0	0	0	0	0	0	0	0	0	0	0	0	0	0	0	0	0	0	0	0	0
Zotu139	1284	0	0	0	0	0	0	0	0	1	0	0	0	0	0	0	0	0	1	1	0	0	0	0	0	0	0	0	0	0	0	0	0	0	0	0	0	0	0	0	290	0	0	0	1	0	0	0	0
Zotu1390	0	0	0	0	0	0	0	0	0	0	0	0	0	0	0	0	0	0	0	0	0	0	0	0	0	0	0	0	0	0	0	0	0	0	0	0	0	0	0	0	0	0	0	0	0	0	0	0	0
Zotu1391	0	0	0	0	0	0	0	0	0	0	0	0	0	0	0	0	0	0	0	0	0	0	0	0	0	0	0	0	0	0	0	0	0	0	0	0	0	0	0	0	0	0	0	0	0	0	0	0	0
Zotu1392	0	0	0	0	0	0	0	0	0	0	0	0	0	0	0	0	0	0	0	0	0	0	0	0	0	0	0	0	0	0	0	0	0	0	0	0	0	0	0	0	0	0	0	0	0	0	0	0	0
Zotu1393	0	0	0	0	0	0	0	0	0	0	0	0	0	0	0	0	0	0	0	0	0	0	0	0	0	0	0	0	0	0	0	0	0	0	0	0	0	0	0	0	0	0	0	0	0	0	0	0	0
Zotu1394	0	0	0	0	0	0	0	0	0	0	0	0	0	0	0	0	0	0	0	0	0	0	0	0	0	0	0	0	0	0	0	0	0	0	0	0	0	0	0	0	0	0	0	0	0	0	0	0	0
Zotu1395	0	0	0	0	0	0	0	0	0	0	0	0	0	0	0	0	0	0	0	0	0	0	0	0	0	0	0	0	0	0	0	0	0	0	0	0	0	0	0	0	0	0	0	0	0	0	0	0	0
Zotu1396	0	0	0	0	0	0	0	0	0	0	0	0	0	0	0	0	0	0	0	0	0	0	0	0	0	0	0	0	0	0	0	0	0	0	0	0	0	0	0	0	0	0	0	0	0	0	0	0	0
Zotu1397	0	0	0	0	0	0	0	0	0	0	0	0	0	0	0	0	0	0	0	0	0	0	0	0	0	0	0	0	2	0	0	0	0	0	0	0	0	0	0	0	0	0	0	0	0	0	0	0	0
Zotu1398	0	0	0	0	0	0	0	0	0	0	0	0	0	0	0	0	0	0	0	0	0	0	0	0	0	0	0	0	0	0	0	0	0	0	0	0	0	0	0	0	0	0	0	0	0	0	0	0	0
Zotu1399	0	0	0	0	0	0	0	0	0	0	0	0	0	0	0	0	0	0	0	0	0	0	0	0	0	0	0	0	0	0	0	0	0	0	0	0	0	0	0	0	0	0	0	0	0	0	0	0	0
Zotu14	871	8	9	4	1104	14	3	2	0	625	5	6	1085	9293	5924	6	26	3501	1844	1	2	5	1	5	5	2	3	1	2	3	1701	1	5	0	11	3785	4	6	3782	7	8	1	6	3	2	0	3	4	6
Zotu140	0	2	5	0	0	0	0	0	1	1	0	0	0	0	1	0	0	0	0	0	0	0	0	0	1	0	0	6	0	0	0	0	0	0	0	0	0	0	0	0	0	0	0	0	0	0	0	0	0
Zotu1400	0	0	0	0	0	0	0	0	0	0	0	0	0	0	0	0	0	0	0	0	0	0	0	0	0	0	0	0	0	0	0	0	0	0	0	0	0	0	0	0	0	0	0	0	0	0	0	0	0
Zotu1401	0	0	0	0	0	0	0	0	0	0	0	0	0	0	0	0	0	0	0	0	0	0	0	0	0	0	0	0	0	0	0	0	0	0	0	0	0	0	0	0	0	0	0	0	0	0	0	0	0
Zotu1402	0	0	0	0	0	0	0	0	0	0	0	0	0	0	0	0	0	0	0	0	0	0	0	0	0	0	0	0	0	0	0	0	0	0	0	0	0	0	0	0	0	0	0	0	0	0	0	0	0
Zotu1403	0	0	0	0	0	0	0	0	0	0	0	0	0	0	0	0	0	0	0	0	0	0	0	0	0	0	0	0	0	0	0	0	0	0	0	0	1	0	0	0	0	0	0	0	0	0	0	0	0
Zotu1404	0	0	0	0	0	0	0	0	0	0	0	0	0	0	0	0	0	0	0	0	0	0	0	0	0	0	0	0	0	0	0	0	0	0	0	0	0	0	0	0	0	0	0	0	0	0	0	0	0
Zotu1405	0	1	0	0	0	0	0	0	0	0	0	0	0	0	0	0	0	0	0	0	0	0	0	0	0	0	0	0	0	0	0	0	0	0	0	0	0	0	0	0	0	0	0	0	0	0	0	0	0
Zotu1406	0	0	0	0	0	0	0	1	0	0	0	0	0	0	0	0	0	0	0	0	0	0	0	0	0	0	0	0	0	0	0	0	0	0	0	0	0	0	0	0	0	0	0	0	0	0	0	0	0
Zotu1407	0	0	0	0	0	0	0	0	0	0	0	0	0	0	0	0	0	0	0	0	0	0	0	0	0	0	0	0	0	0	0	0	0	0	0	0	0	0	0	0	0	0	0	0	0	0	0	0	0
Zotu1408	0	0	0	0	0	0	0	0	0	0	0	0	0	0	0	0	0	0	0	0	0	0	0	0	0	0	0	0	0	0	0	0	0	0	0	0	0	0	0	0	0	0	0	0	0	0	0	0	0
Zotu1409	0	0	0	0	0	0	0	0	0	0	0	0	0	0	0	0	0	0	0	0	0	0	0	0	0	0	0	0	0	0	0	0	0	0	0	0	0	0	0	0	0	0	0	0	0	0	0	0	0
Zotu141	1	0	1	1	0	0	0	0	0	0	0	0	0	0	0	0	0	3	0	0	0	0	0	0	0	0	0	0	0	0	0	0	0	0	0	0	0	0	2	0	0	0	0	0	0	0	0	0	0
Zotu1410	0	0	0	0	0	0	0	0	0	0	0	0	0	0	0	0	0	16	0	0	0	0	0	0	0	0	0	0	0	0	0	0	0	0	0	0	0	0	0	0	0	0	0	0	0	0	0	0	0
Zotu1411	0	0	0	0	0	0	0	0	0	0	0	0	0	0	0	0	0	0	0	0	0	0	0	0	0	0	0	0	0	0	0	0	0	0	0	0	0	0	0	0	0	0	0	0	0	0	0	0	0
Zotu1412	0	0	0	0	0	0	0	0	0	0	0	0	0	0	0	0	0	0	0	0	0	0	0	0	0	0	0	0	0	0	0	0	0	0	0	0	0	0	0	0	0	0	0	0	0	0	0	0	0
Zotu1413	0	0	0	0	0	0	0	0	0	0	0	1	0	0	0	0	0	0	0	0	0	0	0	0	0	0	0	0	0	0	0	0	0	0	0	0	0	0	0	0	0	0	0	0	0	0	0	0	0
Zotu1414	0	0	0	0	0	0	0	0	0	0	0	0	0	0	0	0	0	0	0	0	0	0	0	0	0	0	0	0	0	0	0	0	0	0	0	0	0	0	0	0	0	0	0	0	0	0	0	0	0
Zotu1415	0	0	0	0	0	0	0	0	0	0	0	0	0	0	0	0	0	0	0	0	0	0	0	0	0	0	0	0	0	0	0	0	0	0	0	0	0	0	0	0	0	0	0	0	0	0	0	0	0
Zotu1416	0	0	0	0	0	0	0	0	0	0	0	0	0	0	0	0	0	0	0	0	0	0	0	0	0	0	0	0	0	0	0	0	0	0	0	0	0	1	0	0	0	0	0	0	0	0	0	0	0
Zotu1417	0	0	0	0	0	0	0	0	0	0	0	0	0	0	0	0	0	0	0	0	0	0	0	0	0	0	0	0	0	0	0	0	0	0	0	0	0	0	0	0	0	0	0	0	0	0	0	0	0
Zotu1418	0	0	0	0	0	0	0	0	0	0	0	0	0	0	0	0	0	0	0	0	0	0	0	0	0	0	0	0	0	0	0	0	0	0	0	0	0	0	0	0	0	0	0	0	0	0	0	0	0
Zotu1419	0	0	0	0	0	0	0	0	0	0	0	0	0	0	0	0	0	0	0	0	0	0	0	0	0	0	0	0	0	0	0	0	0	0	0	0	0	0	0	0	0	0	0	0	0	0	0	0	0
Zotu142	0	1	0	0	0	0	0	0	0	0	0	2	1	0	0	0	0	0	0	0	1	0	2	0	0	0	0	0	0	1	0	0	0	0	0	1	0	1	0	0	0	0	0	0	0	0	0	402	0
Zotu1420	0	0	0	0	0	0	0	0	0	0	0	0	0	0	0	0	0	0	0	0	0	0	0	0	0	0	0	0	0	0	0	0	0	0	0	0	0	0	0	0	0	0	0	0	0	0	0	0	0
Zotu1421	0	0	0	0	0	0	0	0	0	0	0	0	0	0	0	0	0	0	0	0	0	0	0	0	0	0	0	0	0	0	0	0	0	0	0	0	0	0	0	0	0	0	0	0	0	0	0	0	0
Zotu1422	0	0	0	0	0	0	0	0	0	0	0	0	0	0	0	0	0	0	0	0	0	0	0	0	0	0	0	0	0	0	0	0	0	0	0	0	0	0	0	0	0	0	0	0	0	0	0	0	0
Zotu1423	0	0	0	0	0	0	0	0	0	0	0	0	0	0	0	0	0	0	0	0	0	0	0	0	0	0	0	0	0	0	0	0	0	0	0	0	0	0	0	0	0	0	0	0	0	0	0	0	0
Zotu1424	0	0	0	0	0	0	0	0	0	0	0	0	0	0	0	0	0	0	0	0	0	0	0	0	0	0	0	0	0	0	0	0	0	0	0	0	0	0	0	0	0	0	0	0	0	0	0	0	0
Zotu1425	0	0	0	0	0	0	0	0	0	0	0	0	0	0	0	0	0	0	0	0	0	0	0	0	0	0	0	0	0	0	0	0	0	0	0	0	0	0	0	0	0	0	0	0	0	0	0	0	0
Zotu1426	2	0	0	0	0	0	0	0	0	0	0	0	0	0	0	0	0	0	0	0	0	0	0	0	0	0	0	0	0	0	0	0	0	0	0	0	0	0	0	0	0	0	0	1	0	0	0	0	0
Zotu1427	0	0	0	0	0	0	0	0	0	0	0	0	0	0	0	0	0	0	0	0	0	0	0	0	0	0	0	0	0	0	0	0	0	0	0	0	0	0	0	0	0	0	0	0	0	0	0	0	0
Zotu1428	0	0	0	0	0	0	0	0	0	0	0	0	0	0	0	0	0	0	0	0	0	0	0	0	0	0	0	0	0	0	0	0	0	0	0	0	0	0	0	0	0	0	0	0	0	0	0	1	0
Zotu1429	0	0	0	0	0	0	0	0	0	0	0	0	0	0	0	0	0	0	0	0	0	0	0	0	0	0	0	0	0	0	0	0	0	0	0	0	0	0	0	0	0	0	0	0	0	0	0	0	0
Zotu143	0	0	0	0	0	0	0	0	0	0	0	0	0	0	0	0	0	0	0	0	0	0	0	0	0	0	0	0	0	0	0	0	0	0	0	1	0	0	0	0	0	0	0	0	0	0	0	0	0
Zotu1430	0	0	0	0	0	0	0	0	0	0	0	0	0	0	0	0	0	0	0	0	0	0	0	0	0	0	0	0	0	0	0	0	0	0	0	0	0	0	0	0	0	0	0	0	0	0	0	0	0
Zotu1431	0	0	0	1	0	0	0	0	0	0	0	0	0	0	0	0	0	0	0	0	0	0	0	0	0	0	0	0	0	0	0	0	0	0	0	0	0	0	0	0	0	0	0	0	0	0	0	0	0
Zotu1432	0	0	0	0	0	0	0	0	0	0	0	0	0	1	0	0	0	0	0	0	0	0	0	0	0	0	0	0	0	0	0	0	0	0	0	0	0	0	0	0	0	0	0	0	0	0	0	0	0
Zotu1433	0	0	0	0	0	1	0	0	0	0	0	0	0	0	0	0	0	0	0	0	0	0	0	0	0	0	0	0	0	0	0	0	0	0	0	0	0	0	0	0	0	0	0	0	0	0	0	0	0
Zotu1434	0	0	0	0	15	0	0	0	0	0	0	0	0	0	0	0	0	0	0	0	0	0	17	0	0	0	6	0	0	0	0	0	0	0	0	0	0	0	0	0	0	0	0	0	0	0	0	0	0
Zotu1435	0	0	0	0	0	0	0	0	0	0	0	0	0	0	0	0	0	0	0	0	0	0	0	0	0	0	0	0	0	0	0	0	0	0	0	0	0	0	0	0	0	0	0	0	0	0	0	0	0
Zotu1436	0	0	0	0	0	0	0	0	0	0	0	0	0	0	0	0	0	0	0	0	0	0	0	0	0	0	0	0	0	0	0	0	0	0	0	0	0	0	0	0	0	0	0	0	0	0	0	0	0
Zotu1437	0	0	0	0	0	0	0	0	0	0	0	0	0	0	0	0	0	0	0	0	0	0	0	0	0	0	0	0	0	0	0	0	0	0	0	0	0	0	0	0	0	0	0	0	0	0	0	0	0
Zotu1438	0	0	0	0	0	0	0	0	0	0	0	0	0	0	0	0	0	0	0	0	0	0	0	0	0	0	0	0	0	0	1	0	0	0	0	0	0	0	0	0	0	0	0	0	0	0	0	0	0
Zotu1439	0	0	0	0	0	0	0	0	0	0	0	0	0	0	0	0	0	0	0	0	0	0	0	0	0	0	0	0	0	0	0	0	0	0	0	0	0	0	0	0	0	0	0	0	0	0	0	0	0
Zotu144	0	0	0	0	0	0	0	0	0	0	0	0	1	0	0	0	0	3	0	0	0	6	324	0	0	0	1	92	48	0	0	0	0	0	0	0	0	2	0	0	0	1	1	0	0	0	0	0	0
Zotu1440	0	0	0	0	0	0	0	0	0	0	0	0	0	0	0	0	0	0	0	0	0	0	0	0	0	0	0	0	0	0	0	0	0	0	0	0	0	0	0	0	0	0	0	0	0	0	0	0	0
Zotu1441	0	0	0	0	0	0	0	0	0	0	0	0	0	0	0	0	0	0	0	0	0	0	0	0	0	0	0	0	0	0	0	0	0	0	0	0	0	0	0	0	0	0	0	0	0	0	0	0	0
Zotu1442	0	0	0	0	0	0	0	0	0	0	0	0	0	0	0	0	0	0	0	0	0	0	0	0	0	0	0	0	0	0	0	0	0	0	0	0	0	0	0	0	0	0	0	0	0	0	0	0	0
Zotu1443	0	0	0	0	0	0	0	0	0	0	0	0	0	0	0	0	0	0	0	0	0	0	0	0	0	0	0	0	0	0	0	0	0	0	0	0	0	0	0	0	0	0	0	0	0	0	0	0	0
Zotu1444	0	0	0	0	0	0	0	0	0	0	0	0	0	0	0	0	0	0	0	0	0	0	0	0	0	0	0	0	0	0	0	0	0	0	0	0	0	0	0	0	0	0	0	0	0	0	0	0	0
Zotu1445	0	0	0	0	0	0	0	0	0	0	0	0	0	0	0	0	0	0	0	0	1	0	0	0	0	0	1	0	0	0	0	0	0	0	0	0	0	0	0	0	0	0	0	0	0	0	0	0	0
Zotu1446	0	0	0	0	0	0	0	0	0	0	0	0	0	0	0	0	0	0	0	0	0	0	0	0	0	0	0	0	0	0	0	0	0	0	0	0	0	0	0	0	0	0	0	0	0	0	0	0	0
Zotu1447	0	0	0	0	0	0	0	0	0	0	0	0	0	0	0	0	0	0	0	0	0	0	0	0	0	0	0	0	0	0	0	0	0	0	0	0	0	0	0	0	0	0	0	0	0	0	0	0	0
Zotu1448	0	0	0	0	0	0	0	0	0	0	0	0	0	0	0	0	0	0	0	0	0	0	0	0	0	0	0	0	0	0	0	0	0	0	0	0	0	0	0	0	0	0	0	0	0	0	0	0	0
Zotu1449	0	0	0	0	0	0	0	0	0	0	0	0	0	0	0	0	0	0	0	0	0	0	0	0	0	0	0	0	0	0	0	0	0	0	0	0	0	0	0	0	0	0	0	2	0	0	0	0	0
Zotu145	1	0	1	2	0	5	0	0	0	0	0	0	0	0	0	0	0	0	0	1	0	0	0	3	1	2	0	62	1	0	0	0	0	0	0	0	2	1	2	0	0	3	0	0	0	3	1	0	0
Zotu1450	0	0	0	0	0	0	0	0	0	0	0	0	0	0	0	0	0	0	0	0	0	0	0	0	0	0	0	0	0	0	0	0	0	0	0	0	0	0	0	0	0	0	0	0	0	0	0	0	0
Zotu1451	0	0	0	0	0	0	0	0	1	0	0	0	0	0	0	0	0	0	0	0	0	0	0	0	0	0	0	0	0	0	0	0	0	0	0	0	0	0	0	0	0	0	0	0	0	0	0	0	0
Zotu1452	0	0	0	0	0	0	0	0	0	0	0	0	0	0	0	0	0	0	0	0	0	0	0	0	0	0	0	0	0	0	0	0	0	0	0	0	0	0	0	0	0	0	0	0	0	0	0	0	0
Zotu1453	0	0	0	0	0	0	0	0	0	0	0	0	0	0	0	0	0	0	0	0	0	0	0	0	0	0	0	0	0	0	0	0	0	0	0	0	0	0	0	0	0	0	0	0	0	0	0	0	0
Zotu1454	0	0	0	0	0	0	0	0	0	0	0	0	0	0	0	0	0	0	0	0	0	0	0	0	0	0	0	0	0	0	0	0	0	0	0	0	0	0	0	0	0	0	0	0	0	0	0	0	0
Zotu1455	0	0	0	0	0	0	0	0	0	0	0	0	0	0	0	0	0	0	0	0	0	0	0	0	0	0	0	0	0	0	0	0	0	0	0	0	0	0	0	0	0	0	0	0	0	0	0	0	0
Zotu1456	0	0	0	0	0	0	0	0	0	0	0	0	0	0	0	0	0	0	0	0	0	0	0	0	0	0	0	0	0	0	0	0	0	0	0	0	0	0	0	0	0	0	0	0	0	0	0	0	0
Zotu1457	0	0	0	0	0	0	0	0	0	0	0	0	0	0	0	0	0	0	0	0	0	0	0	0	0	0	0	0	0	0	0	0	0	0	0	0	0	0	0	0	0	0	0	0	0	0	0	0	0
Zotu1458	0	0	0	0	0	0	0	0	0	0	0	0	1	0	0	0	0	0	0	0	0	0	0	0	0	0	152	0	0	0	0	0	0	0	0	0	0	0	0	0	0	0	0	0	0	0	0	0	0
Zotu1459	0	0	0	0	0	0	0	0	0	0	0	0	0	0	0	0	0	0	0	0	0	0	0	0	0	0	0	0	0	0	0	0	0	0	0	0	0	0	0	0	0	0	0	0	0	0	0	0	0
Zotu146	0	0	0	1	0	0	0	0	0	0	0	0	0	0	0	0	0	9	0	0	0	0	0	0	0	0	0	0	0	0	0	0	0	0	1	2	1	0	0	0	0	0	0	53	0	0	0	0	0
Zotu1460	0	0	0	0	0	0	0	0	0	0	0	0	0	0	0	0	0	0	0	0	0	0	0	0	0	0	0	0	0	0	0	0	0	0	0	0	0	0	0	0	0	0	0	0	0	0	0	0	0
Zotu1461	0	0	0	0	0	0	0	0	0	0	0	0	0	0	0	0	0	0	0	0	0	0	0	0	0	0	0	0	0	0	0	0	0	0	0	0	0	0	0	0	0	0	0	0	0	0	0	0	0
Zotu1462	0	0	0	0	0	0	0	0	0	0	0	0	0	0	0	0	0	0	0	0	0	0	0	0	0	0	0	0	0	0	0	0	0	0	0	0	0	0	0	0	0	0	0	0	0	0	0	0	0
Zotu1463	0	0	0	0	0	0	0	0	0	0	0	0	0	0	0	0	0	0	0	0	0	0	0	0	0	0	0	0	0	0	0	0	0	0	0	0	0	0	0	0	0	0	0	0	0	0	0	0	0
Zotu1464	0	0	0	0	0	0	0	0	0	0	0	0	0	0	0	0	0	0	0	1	0	0	0	0	0	0	0	0	0	0	0	0	0	0	0	0	0	0	0	0	0	0	0	0	0	0	0	0	0
Zotu1465	0	0	0	0	0	0	0	0	0	0	0	0	0	0	0	0	0	0	0	0	0	0	0	0	0	0	0	0	0	0	0	0	0	0	0	0	0	0	0	0	0	0	0	0	0	0	0	0	0
Zotu1466	0	0	0	0	0	0	0	0	0	0	0	0	0	0	0	0	0	0	0	0	0	0	0	0	0	0	0	0	0	0	0	0	0	0	0	0	0	0	0	0	0	0	0	0	0	0	0	0	0
Zotu1467	0	0	0	0	0	0	0	0	0	0	0	0	0	0	0	0	0	0	0	0	0	0	0	0	0	0	0	0	0	0	0	0	0	0	0	0	0	0	0	0	0	0	0	0	0	0	0	0	0
Zotu1468	0	0	0	0	0	0	0	0	0	0	0	0	0	0	0	0	0	0	0	0	0	0	0	0	0	0	0	0	0	0	0	0	0	0	0	0	0	0	0	0	0	0	0	0	0	0	0	0	0
Zotu1469	0	0	0	0	0	0	0	0	0	0	0	0	0	0	0	0	0	0	0	0	0	0	0	0	0	0	0	0	0	0	0	0	0	0	0	0	0	0	0	0	0	0	0	0	0	0	0	0	0
Zotu147	0	0	0	0	0	0	0	0	0	0	0	0	0	0	0	0	0	0	0	0	0	0	0	0	0	0	0	0	0	0	0	0	0	0	0	0	0	0	0	0	0	0	0	0	0	0	0	0	0
Zotu1470	0	0	0	0	0	0	0	0	0	0	0	0	0	0	0	0	0	0	0	0	0	0	0	0	0	0	0	0	9	0	0	0	0	0	0	0	0	0	0	0	0	0	0	0	0	0	0	0	0
Zotu1471	0	0	0	0	0	0	0	0	0	0	0	0	0	0	0	0	0	0	0	0	0	0	0	0	0	0	0	0	0	0	0	0	0	0	0	0	0	0	0	0	0	0	0	0	0	0	0	0	0
Zotu1472	0	0	0	0	0	0	0	0	0	0	0	0	0	0	0	0	0	0	0	0	0	0	0	0	0	0	0	0	0	0	0	0	0	0	0	0	0	0	0	0	0	0	0	0	0	0	0	0	0
Zotu1473	0	0	0	0	0	0	0	0	0	0	0	0	0	0	0	0	0	0	0	0	0	0	0	0	0	0	0	0	0	0	0	0	0	0	0	0	0	0	0	0	0	0	0	0	0	0	0	0	0
Zotu1474	0	0	0	0	0	0	0	0	0	0	0	0	0	0	0	0	0	0	0	0	0	0	0	0	0	0	0	0	0	0	0	0	0	0	0	0	0	0	0	0	0	0	0	0	0	0	0	0	0
Zotu1475	0	0	0	0	0	0	0	0	0	0	0	0	0	0	0	0	0	0	0	0	0	0	0	0	0	0	0	0	0	0	0	0	0	0	0	0	0	0	0	0	0	0	0	0	0	0	0	0	0
Zotu1476	0	0	0	0	0	0	0	0	0	0	0	0	0	0	0	0	0	0	0	0	0	0	0	0	0	0	0	0	0	0	0	0	0	0	0	0	0	0	0	0	0	0	0	0	0	0	0	0	0
Zotu1477	0	0	0	0	0	0	0	0	0	0	0	0	0	0	0	0	0	0	0	0	0	0	0	0	0	0	0	0	0	0	0	0	0	0	0	0	0	0	0	0	0	0	0	0	0	0	0	0	0
Zotu1478	0	0	0	0	0	0	0	0	0	0	0	0	0	0	0	0	0	0	0	0	0	0	0	0	0	0	0	0	0	0	0	0	0	0	0	0	0	0	0	0	0	0	0	0	0	0	0	0	0
Zotu1479	0	0	0	0	0	0	0	0	0	0	0	0	0	0	0	0	0	0	0	0	0	0	0	0	0	0	0	0	0	0	0	0	0	0	0	0	0	0	0	0	0	0	0	0	0	0	0	0	0
Zotu148	0	0	0	0	0	0	0	0	0	0	0	0	0	1	0	0	0	0	0	0	0	0	1	0	1	0	1	1	0	0	1	924	1	0	0	0	0	2945	0	0	0	0	0	1	0	1	0	1	0
Zotu1480	0	0	0	0	0	0	0	0	0	0	0	0	0	0	0	0	0	0	0	0	0	0	0	0	0	0	0	0	0	0	0	0	0	0	0	0	0	0	0	0	0	0	0	0	0	0	0	0	0
Zotu1481	0	0	0	0	0	0	0	0	0	0	0	0	0	0	0	0	0	0	0	0	0	0	0	0	0	0	0	0	0	0	0	0	0	0	0	0	0	0	0	0	0	0	0	0	0	0	0	0	0
Zotu1482	0	0	0	0	0	0	0	0	0	0	0	0	0	0	0	0	0	0	0	0	0	0	0	0	0	0	0	0	0	0	0	0	0	0	0	0	0	0	0	0	0	0	0	0	0	0	0	0	0
Zotu1483	0	0	0	0	0	0	0	0	0	0	0	0	0	0	0	0	0	0	0	0	0	0	0	0	0	0	0	0	0	0	0	0	0	0	0	0	0	0	0	0	0	0	0	0	0	0	0	1	0
Zotu1484	0	0	0	0	0	0	0	0	0	0	0	0	0	0	0	0	0	0	0	0	0	0	0	0	0	0	0	0	0	0	0	0	0	0	0	0	0	0	0	0	0	0	0	0	0	0	0	0	0
Zotu1485	0	0	0	0	0	0	0	0	0	0	0	0	0	0	0	0	0	0	0	0	0	0	0	0	0	0	0	0	0	0	0	0	0	0	0	0	0	0	0	0	0	0	0	0	0	0	0	0	0
Zotu1486	0	0	0	0	0	0	0	0	0	0	0	0	0	0	0	0	0	0	0	0	0	0	0	0	0	0	0	0	18	0	0	0	0	0	0	0	0	0	0	0	0	0	0	0	0	0	1	0	0
Zotu1487	0	0	0	0	0	0	0	0	0	0	0	0	0	0	0	0	0	0	0	0	0	0	0	0	0	0	0	0	0	0	0	0	0	0	0	0	0	0	0	0	0	0	0	0	0	0	0	0	0
Zotu1488	0	0	0	0	0	0	0	0	0	0	0	0	0	0	0	0	0	0	0	0	0	0	0	0	0	0	0	0	30	0	0	0	0	0	0	0	0	0	0	0	0	0	0	0	0	0	0	0	0
Zotu1489	0	0	0	0	0	0	0	0	0	0	0	0	0	0	0	0	0	0	0	0	0	0	0	0	0	0	0	0	0	0	0	0	0	0	0	0	0	0	0	0	0	0	0	0	0	0	0	0	0
Zotu149	0	0	0	1	0	0	0	0	0	0	0	1	0	0	0	0	0	0	0	0	0	0	0	0	0	0	0	1	0	0	0	0	0	1	0	1	2	0	0	0	0	0	0	0	0	0	2	0	2
Zotu1490	0	0	0	0	0	0	0	0	0	0	0	0	0	0	0	0	0	0	0	0	0	0	0	0	0	0	0	0	0	0	0	0	0	0	0	0	0	0	0	0	0	0	0	0	0	0	0	0	0
Zotu1491	0	0	0	0	0	0	0	0	0	0	0	0	0	0	0	0	0	0	0	0	0	0	0	0	0	0	0	0	0	0	0	0	1	0	0	0	0	0	0	0	0	0	0	0	0	0	0	0	0
Zotu1492	0	0	0	0	0	0	0	0	0	0	0	0	0	0	0	0	0	0	0	0	0	0	0	0	0	0	0	0	39	0	0	0	0	0	0	0	0	0	0	0	0	0	0	0	0	0	0	0	0
Zotu1493	0	0	0	0	0	0	0	0	0	0	0	0	0	0	0	0	0	0	0	0	0	0	0	0	0	0	0	0	0	0	0	0	0	0	0	0	0	0	0	0	0	0	0	0	0	0	0	0	0
Zotu1494	0	0	0	0	0	0	0	0	0	0	0	0	0	0	0	0	0	0	0	0	0	0	0	0	0	0	0	0	0	0	0	0	0	0	0	0	0	0	0	0	0	0	0	0	0	0	0	0	0
Zotu1495	0	0	0	0	0	0	0	0	0	0	0	0	0	0	0	0	0	0	0	0	0	0	0	0	0	0	0	0	0	0	0	0	0	0	0	0	0	0	0	0	0	0	0	0	0	0	0	0	0
Zotu1496	0	0	0	0	0	0	0	0	0	0	0	0	0	0	0	0	0	29	0	0	0	0	0	0	0	0	0	0	0	0	0	0	0	0	0	0	0	0	0	0	0	0	0	0	0	0	0	0	0
Zotu1497	0	0	0	0	0	0	0	0	0	0	0	0	0	0	0	0	0	0	0	0	0	0	0	0	0	0	0	0	0	0	0	0	0	0	0	0	0	0	0	0	0	0	0	0	0	0	0	0	0
Zotu1498	0	0	0	0	0	0	0	0	0	0	0	0	0	0	0	0	0	0	0	0	0	0	0	0	0	0	0	0	0	0	0	0	0	0	0	0	0	0	0	0	0	0	0	0	0	0	0	0	0
Zotu1499	0	0	0	0	0	0	0	0	0	0	0	0	0	0	0	0	0	0	0	0	0	0	0	0	0	0	0	0	0	0	0	0	0	0	1	0	0	0	0	0	0	0	0	0	0	0	0	0	0
Zotu15	0	0	0	0	0	1	0	2298	2553	8	8	2554	567	0	0	0	0	7	4378	1	2332	0	12	0	2	0	658	2	54	2	5	3	4909	3956	0	3257	609	1045	1	1	1	4	502	1381	1	2620	2269	1553	6
Zotu150	0	0	0	0	0	0	0	0	0	0	0	0	0	0	0	0	0	0	0	0	0	0	0	0	0	0	0	0	11	0	0	0	0	0	0	0	0	0	0	0	0	0	0	0	0	2	0	0	0
Zotu1500	0	0	0	0	0	0	0	0	0	0	0	0	0	0	0	0	0	0	0	0	0	0	0	0	0	0	0	0	0	0	0	0	0	0	0	0	0	0	0	0	0	0	0	0	0	0	0	0	0
Zotu1501	0	0	0	0	0	0	0	0	0	0	0	10	0	0	0	0	0	0	0	0	0	0	0	0	0	0	0	0	0	0	0	0	0	0	0	0	0	0	0	0	0	0	0	0	0	0	0	0	0
Zotu1502	0	0	0	0	0	0	0	0	0	0	0	0	0	0	0	0	0	0	0	0	0	0	0	0	0	0	0	0	0	0	0	0	0	0	0	0	0	0	1	0	0	0	0	0	0	0	0	0	0
Zotu1503	0	0	0	0	0	0	0	0	0	0	0	0	0	0	0	0	0	0	0	0	0	0	0	0	0	0	0	0	0	0	0	0	0	0	0	0	0	0	0	0	0	0	0	0	0	0	0	0	0
Zotu1504	0	0	0	0	0	0	0	0	0	0	0	0	0	0	0	0	0	0	0	0	0	0	0	0	0	0	0	0	0	0	0	0	0	0	0	0	0	0	0	0	0	0	0	0	0	0	0	0	0
Zotu1505	0	0	0	0	0	0	0	0	0	0	0	0	0	0	0	0	0	0	0	0	0	0	0	0	0	0	0	0	0	0	0	0	0	0	0	0	0	0	0	0	0	0	0	0	0	0	0	0	0
Zotu1506	0	0	0	0	0	0	0	0	0	0	0	0	0	0	0	0	0	0	0	0	0	0	0	0	0	0	0	0	0	0	0	0	0	0	0	0	0	0	0	0	0	0	0	0	0	0	0	0	0
Zotu1507	175	0	0	0	0	0	0	0	0	0	0	0	0	0	0	0	0	0	0	0	0	0	0	0	0	0	0	0	0	0	0	0	0	0	0	0	0	0	0	0	0	0	0	0	0	0	0	0	0
Zotu1508	0	0	0	0	0	0	0	0	0	0	0	0	0	0	0	0	0	0	0	0	0	0	0	0	0	0	0	0	0	0	0	0	0	0	0	0	0	0	0	0	0	0	0	0	0	0	0	0	0
Zotu1509	0	0	0	0	0	0	0	0	0	0	0	0	0	0	0	0	0	0	0	0	0	0	0	0	0	0	0	0	0	0	0	0	0	0	0	0	0	0	0	0	0	0	0	0	0	0	0	0	0
Zotu151	0	0	0	0	0	0	0	0	0	0	0	0	0	0	0	0	0	0	0	0	0	0	0	0	0	0	0	0	0	0	0	0	0	0	0	0	0	0	0	0	0	0	0	0	0	1	1	0	0
Zotu1510	0	0	0	0	0	0	0	0	0	0	0	0	0	0	0	0	0	0	0	0	0	0	0	0	0	0	0	0	0	0	0	0	0	1	0	0	0	0	0	0	0	0	0	0	0	0	0	0	0
Zotu1511	0	0	0	0	0	0	0	0	0	0	0	0	0	0	0	0	0	0	0	0	0	0	0	0	0	0	0	0	0	0	0	0	0	0	0	0	0	0	0	0	0	0	0	0	0	0	0	0	0
Zotu1512	0	0	0	0	0	0	0	0	0	0	0	0	0	0	0	0	0	0	0	0	0	0	0	0	0	0	0	0	0	0	0	0	0	0	0	0	0	0	0	0	0	0	0	0	0	0	0	0	0
Zotu1513	0	0	0	0	0	0	0	0	0	0	0	0	0	0	0	0	0	0	0	0	0	0	0	0	0	0	0	0	0	0	0	0	0	0	0	0	0	0	0	0	0	0	0	0	0	0	0	0	0
Zotu1514	0	0	0	0	0	0	0	0	0	0	0	0	0	0	0	0	0	0	0	0	0	0	0	0	0	0	0	0	0	0	0	0	0	0	0	0	0	0	0	0	0	0	0	0	0	0	0	0	0
Zotu1515	0	0	0	0	0	0	0	0	0	0	0	0	0	0	0	0	0	0	0	0	0	0	0	0	0	0	0	0	0	0	0	0	0	0	0	0	0	0	0	0	0	0	0	0	0	0	0	0	0
Zotu1516	0	0	0	0	0	0	0	0	0	0	0	0	0	0	0	0	0	0	0	0	0	0	0	0	0	0	0	0	0	0	0	0	0	0	0	0	0	0	0	0	0	0	0	0	0	0	0	0	0
Zotu1517	0	0	0	0	0	0	0	0	0	0	0	0	0	0	0	0	0	0	0	0	0	0	0	0	0	0	0	0	0	0	0	0	0	0	0	0	0	0	0	0	0	0	0	0	0	0	0	0	0
Zotu1518	0	0	0	0	0	0	0	0	0	0	0	0	0	0	0	0	0	0	0	0	0	0	0	0	0	0	0	0	0	0	0	0	0	0	0	0	0	0	0	0	0	0	0	0	0	0	0	0	0
Zotu1519	0	0	0	0	0	0	0	0	0	0	0	0	0	0	0	0	0	0	0	0	0	0	0	0	0	0	0	0	0	0	0	0	0	0	0	0	0	0	0	0	0	0	0	0	0	0	0	0	0
Zotu152	1	0	0	0	0	0	0	0	0	0	0	0	0	0	1	0	0	229	0	0	0	0	0	0	0	2	0	0	0	0	0	0	0	0	0	0	0	0	0	0	2	0	0	0	0	0	0	0	0
Zotu1520	0	0	0	0	0	0	0	0	0	0	0	0	0	0	0	0	0	0	0	0	0	0	0	0	0	0	0	0	0	0	0	0	0	0	0	0	0	0	0	0	0	0	0	0	0	0	0	0	0
Zotu1521	0	0	0	0	0	0	0	0	0	0	0	0	0	0	0	0	0	0	0	0	0	0	196	0	0	0	0	0	1	0	0	0	0	0	0	0	0	0	0	0	0	0	0	0	0	0	0	0	0
Zotu1522	0	0	0	0	0	0	0	0	0	0	0	0	0	0	0	0	0	0	0	0	0	0	0	0	0	0	0	0	0	0	0	0	0	0	0	0	0	0	0	0	0	0	0	0	0	0	0	0	0
Zotu1523	0	0	0	0	0	0	0	0	0	0	0	0	0	0	0	0	0	0	0	0	0	0	0	0	0	0	0	0	0	0	0	0	0	0	0	0	0	0	0	0	0	0	0	0	0	0	0	0	0
Zotu1524	0	0	0	0	0	0	0	0	0	0	0	0	0	0	0	0	0	0	0	0	0	0	0	0	0	0	0	0	0	0	0	0	0	0	0	0	0	0	0	0	0	0	0	0	0	0	0	0	0
Zotu1525	0	0	0	0	0	0	0	0	0	0	0	0	0	0	0	0	0	0	0	0	0	0	0	0	0	0	0	0	0	0	0	0	0	0	0	0	0	0	0	0	0	0	0	0	0	0	0	0	0
Zotu1526	0	0	0	0	0	0	0	0	0	0	0	0	0	0	0	0	0	0	0	0	0	0	0	0	0	0	0	0	0	0	0	0	0	0	0	0	0	0	0	0	0	0	0	0	0	0	0	0	0
Zotu1527	0	0	0	0	0	0	0	0	0	0	0	0	0	0	0	0	0	0	0	0	0	0	0	0	0	0	0	0	0	0	0	0	0	0	0	0	0	0	0	0	0	0	0	0	0	0	0	0	0
Zotu1528	0	0	0	0	0	0	0	0	0	0	0	0	0	0	0	0	0	0	0	0	0	0	0	0	0	0	0	0	0	0	0	0	0	0	0	0	0	0	0	0	0	0	0	0	0	0	0	0	0
Zotu1529	0	0	0	0	0	0	0	0	0	0	0	0	0	0	0	0	0	0	0	0	0	0	0	0	0	0	0	0	0	0	0	0	0	0	0	0	0	0	0	0	0	0	0	0	0	0	0	0	0
Zotu153	0	0	0	0	4	0	0	1	0	47	0	0	1	0	1	0	0	5	364	0	0	0	0	1	0	0	0	0	0	0	0	0	1	0	0	0	0	0	0	0	0	0	0	0	0	0	0	0	0
Zotu1530	0	0	0	0	0	0	0	0	0	0	0	0	0	0	0	0	0	0	0	0	0	0	158	0	0	0	0	0	0	0	0	0	0	0	0	0	0	0	0	0	0	0	0	0	0	0	0	0	0
Zotu1531	0	0	0	0	0	0	0	0	0	0	0	0	0	0	0	0	0	0	0	0	0	0	0	0	0	0	0	0	0	0	0	0	0	0	0	0	0	0	0	0	0	0	0	0	0	0	0	0	0
Zotu1532	0	0	0	0	0	0	0	0	0	0	0	0	0	0	0	0	0	0	0	0	0	0	0	0	0	0	0	0	0	0	0	0	0	0	0	0	0	0	0	0	0	0	0	0	0	0	0	0	0
Zotu1533	0	0	0	0	0	0	0	0	0	0	0	0	0	0	0	0	0	0	0	0	0	0	0	0	0	0	0	0	0	0	0	0	0	0	0	0	0	0	0	0	0	0	0	0	0	0	0	0	0
Zotu1534	0	0	0	0	0	0	0	0	0	0	0	0	0	0	0	0	0	0	0	0	0	0	0	0	0	0	0	0	0	0	0	0	0	0	0	0	0	0	0	0	0	0	0	0	0	0	0	0	0
Zotu1535	0	0	0	0	0	0	0	0	0	0	0	0	0	0	0	0	0	0	0	0	0	0	0	0	0	0	0	0	0	0	0	0	0	0	0	0	0	0	0	0	0	0	0	0	0	0	0	0	0
Zotu1536	0	0	0	0	0	0	0	0	0	0	0	0	0	0	0	0	0	0	0	0	0	0	0	0	0	0	0	0	0	0	0	0	0	0	0	0	0	0	0	0	0	0	0	0	0	0	0	0	0
Zotu1537	0	0	0	0	0	0	0	0	0	0	0	0	0	0	0	0	0	0	0	0	0	0	0	0	0	0	0	0	0	0	0	0	0	0	0	0	0	0	0	0	0	0	0	0	0	0	0	0	0
Zotu1538	0	0	0	0	0	0	0	0	0	0	0	0	0	0	0	0	0	0	0	0	0	0	0	0	0	0	0	0	0	0	0	0	0	0	0	0	0	0	0	0	0	0	0	0	0	0	0	0	0
Zotu1539	0	0	0	0	0	0	0	0	0	0	0	0	0	0	0	0	0	0	0	0	0	0	0	0	0	0	0	0	0	0	0	0	0	0	0	0	0	0	0	0	0	0	0	0	0	0	0	0	0
Zotu154	0	0	0	0	0	0	0	0	0	0	0	0	0	0	0	0	0	0	0	0	0	0	0	0	0	0	0	0	210	0	1	0	0	1	0	0	0	0	0	0	0	0	0	0	0	1	0	1	0
Zotu1540	0	0	0	0	0	0	0	0	0	0	0	0	0	0	0	0	0	0	0	0	0	0	0	0	0	0	0	0	0	0	0	0	0	0	0	0	0	0	0	0	0	0	0	0	0	0	0	0	0
Zotu1541	0	0	0	0	0	0	0	0	0	0	0	0	0	0	0	0	0	0	0	0	0	0	0	0	0	0	0	0	0	0	0	0	0	0	0	0	0	0	0	0	0	0	0	0	0	0	0	0	0
Zotu1542	0	0	0	0	0	0	0	0	0	0	0	0	0	0	0	0	0	0	0	0	0	0	0	0	0	0	0	0	0	0	0	0	0	0	0	0	0	0	0	0	0	0	0	0	0	0	0	0	0
Zotu1543	0	0	0	0	0	0	0	0	0	0	0	0	0	0	0	0	0	0	0	0	0	0	0	0	0	0	0	0	0	0	0	0	0	0	0	0	0	0	0	0	0	0	0	0	0	0	0	0	0
Zotu1544	0	0	0	0	0	0	0	0	0	0	0	0	0	0	0	0	0	0	0	0	0	0	0	0	0	0	0	0	0	0	0	0	0	0	0	0	0	0	0	0	0	0	0	0	0	0	0	0	0
Zotu1545	0	0	0	0	0	0	0	0	0	0	0	0	0	0	0	0	0	0	0	0	0	0	0	0	0	0	0	0	0	0	0	0	0	0	0	0	0	0	0	0	0	0	0	0	0	0	0	0	0
Zotu1546	0	0	0	0	0	0	0	0	0	0	0	0	0	0	0	0	0	0	0	0	0	0	0	0	0	0	0	0	0	0	0	0	0	0	0	0	0	0	0	0	0	0	0	0	0	0	0	0	0
Zotu1547	0	0	0	0	0	0	0	0	0	0	0	0	0	0	0	0	0	0	0	0	0	0	0	0	0	0	0	0	0	0	0	0	0	0	0	0	0	0	0	0	0	0	0	0	0	0	0	0	0
Zotu1548	0	0	0	0	0	0	0	0	0	0	0	0	0	0	0	0	0	0	0	0	0	0	0	0	0	0	0	0	0	0	0	0	0	0	0	0	0	0	0	0	0	0	0	0	0	0	0	0	0
Zotu1549	0	0	0	0	0	0	0	0	0	0	0	0	0	0	0	0	0	0	0	0	0	0	0	0	0	0	0	0	0	0	0	0	0	0	0	0	0	0	0	0	0	0	0	0	0	0	0	0	0
Zotu155	0	0	0	0	0	0	0	0	0	0	0	0	0	0	0	0	0	3	0	0	0	0	0	0	1	0	0	0	28	0	0	0	0	0	0	0	0	0	0	0	0	0	0	0	0	0	0	0	0
Zotu1550	0	0	0	0	0	0	0	0	0	0	0	0	0	0	0	0	0	0	0	0	0	0	0	0	0	0	0	0	0	0	0	0	0	0	0	0	0	0	0	0	0	0	0	0	0	0	0	0	0
Zotu1551	0	0	0	0	0	0	0	0	0	0	0	0	0	0	0	0	0	0	0	0	0	0	0	0	0	0	0	0	0	0	0	0	0	0	0	0	0	0	0	0	0	0	0	0	0	0	0	0	0
Zotu1552	0	0	0	0	1	0	0	0	0	0	0	68	0	0	0	0	0	0	0	0	0	0	0	0	0	0	0	0	0	0	0	0	0	0	0	0	0	0	0	0	0	0	0	0	0	7	0	0	0
Zotu1553	0	0	0	0	0	0	0	0	0	0	0	0	0	0	0	0	0	0	0	0	0	0	0	0	0	0	0	0	0	0	0	0	0	0	0	0	0	0	0	0	0	0	0	0	0	0	0	0	0
Zotu1554	0	0	0	0	0	0	0	0	0	0	0	0	0	0	0	0	0	0	0	0	0	0	0	0	0	0	0	0	0	0	0	0	0	0	0	0	0	0	0	0	0	0	0	0	0	0	0	0	0
Zotu1555	0	0	0	0	0	0	0	0	0	0	0	0	0	0	0	0	0	0	0	0	0	0	0	0	0	0	0	0	0	0	0	0	0	0	0	0	0	0	0	0	0	0	0	0	0	0	0	0	0
Zotu1556	0	0	0	0	0	0	0	0	0	0	0	0	0	0	0	0	0	0	0	0	0	0	0	0	0	0	0	0	0	0	0	0	0	0	0	0	0	0	0	0	0	0	0	0	0	0	0	0	0
Zotu1557	0	0	0	0	0	0	0	0	0	0	0	0	0	0	0	0	0	0	0	0	0	0	0	0	0	0	0	0	0	0	0	0	0	0	0	0	0	0	0	0	0	0	0	0	0	0	0	0	0
Zotu1558	0	0	0	0	0	0	0	0	0	0	0	0	0	0	0	0	0	0	0	0	0	0	0	0	0	0	0	0	0	0	0	0	0	0	0	0	0	0	0	0	0	0	0	0	0	0	0	0	0
Zotu1559	0	0	0	0	0	0	0	0	0	0	0	0	0	0	0	0	0	0	0	0	0	0	0	0	0	0	0	0	0	0	0	0	0	0	0	0	0	0	0	0	0	0	0	0	0	0	0	0	0
Zotu156	0	0	906	0	0	1	0	0	0	0	0	0	0	0	0	0	2	7	0	0	0	0	0	0	0	0	0	0	0	0	0	0	0	0	0	0	0	0	0	0	0	0	0	0	0	0	0	0	0
Zotu1560	0	0	0	0	0	0	0	0	0	0	0	0	0	0	0	0	0	0	0	0	0	0	0	0	0	0	0	0	0	0	0	0	0	0	0	0	0	0	0	0	0	0	0	0	0	0	0	0	0
Zotu1561	0	0	0	0	0	0	0	0	0	0	0	0	0	0	0	0	0	0	0	0	0	0	0	0	0	0	0	0	0	0	0	0	0	0	0	0	0	0	0	0	0	0	0	0	0	0	0	0	0
Zotu1562	0	0	0	0	0	0	0	0	0	0	0	0	0	0	0	0	0	0	0	0	0	0	0	0	0	0	0	0	0	0	0	0	0	0	0	0	0	0	0	0	0	0	0	0	0	0	0	0	0
Zotu1563	0	0	0	0	0	0	0	0	0	0	0	0	0	0	0	0	0	0	0	0	0	0	0	0	0	0	0	0	0	0	0	0	0	0	0	0	0	0	0	0	0	0	0	0	0	0	0	1	0
Zotu1564	0	0	0	0	0	0	0	0	0	0	0	0	0	0	0	0	0	0	0	0	0	0	0	0	0	0	0	0	0	0	0	0	0	0	0	0	0	0	0	0	0	0	0	0	0	0	0	0	0
Zotu1565	0	0	0	0	0	0	0	0	0	0	0	0	0	0	0	0	0	0	0	0	0	0	0	0	0	0	0	0	0	0	0	0	0	0	0	0	0	0	0	0	0	0	0	0	0	0	0	0	0
Zotu1566	0	0	0	0	0	0	0	0	0	0	0	0	0	0	0	0	0	0	0	0	0	0	0	0	0	0	0	0	0	0	0	0	0	0	0	0	0	0	0	0	0	0	0	0	0	0	0	0	0
Zotu1567	0	0	0	0	0	0	0	0	0	0	0	0	0	0	0	0	0	0	0	0	0	0	0	0	0	0	0	0	0	0	0	0	0	0	0	0	0	0	0	0	0	0	0	0	0	0	0	0	0
Zotu1568	0	0	0	0	0	0	0	0	0	0	0	0	0	0	0	0	0	0	0	0	0	0	0	0	0	0	0	0	0	0	0	0	0	0	0	0	0	0	0	0	0	0	0	0	0	0	0	0	0
Zotu1569	0	0	0	0	0	0	0	0	0	0	0	0	0	0	0	0	0	0	0	0	0	0	0	0	0	0	0	0	0	0	0	0	0	0	0	0	0	0	0	0	0	0	0	0	0	0	0	0	0
Zotu157	0	1	0	0	0	0	0	0	0	0	0	0	0	0	53	0	0	0	0	0	0	0	0	0	0	2	0	0	0	6938	0	0	0	0	0	0	0	0	0	0	52	0	0	0	0	0	0	0	0
Zotu1570	0	0	0	0	0	0	0	0	0	18	0	0	0	0	0	1	0	0	23	0	0	0	0	0	0	0	0	0	0	0	0	0	0	0	0	68	0	0	0	0	0	0	0	0	0	0	0	0	0
Zotu1571	0	0	0	0	0	0	0	0	0	0	0	0	0	0	0	0	0	0	0	0	0	0	0	0	0	0	0	0	0	0	0	0	0	0	0	0	0	0	0	0	0	0	0	0	0	0	0	0	0
Zotu1572	0	0	0	0	0	0	0	0	0	0	0	0	0	0	0	0	0	0	0	0	0	0	0	0	0	0	0	0	0	0	0	0	0	0	0	0	0	0	0	0	0	0	0	0	0	0	0	0	0
Zotu1573	0	0	0	2	0	0	0	0	0	0	0	0	0	0	0	0	0	0	0	0	0	0	0	0	0	0	0	0	0	0	0	0	0	0	0	0	0	0	0	0	0	0	0	0	0	0	0	0	0
Zotu1574	0	0	0	0	0	0	0	0	0	0	0	0	0	0	0	0	0	5	0	0	0	0	0	0	0	0	0	0	0	0	0	0	0	0	0	0	0	1	0	0	0	0	0	0	0	0	0	0	0
Zotu1575	0	0	0	0	0	0	0	0	1	0	0	0	0	0	0	0	0	0	0	0	0	0	0	0	0	0	0	0	0	0	0	0	0	0	0	0	0	0	0	0	0	0	0	0	0	0	1	0	0
Zotu1576	0	0	0	0	0	0	0	0	0	0	0	0	0	0	0	0	0	0	0	0	0	0	0	0	0	0	0	0	0	0	0	0	0	0	0	0	0	0	0	0	0	0	0	0	0	0	0	0	0
Zotu1577	0	0	0	1	0	0	0	0	0	0	0	0	0	0	0	0	0	0	0	0	0	0	0	0	0	0	0	0	0	0	0	0	0	0	0	0	0	0	0	0	0	0	0	0	0	0	0	0	0
Zotu1578	0	0	0	0	0	0	0	0	0	0	0	0	0	0	0	0	0	0	0	0	0	0	0	0	0	0	0	0	0	0	0	0	0	0	0	0	0	0	0	0	0	0	0	0	0	0	0	0	0
Zotu1579	0	0	0	0	0	0	0	0	0	0	0	0	0	0	0	0	0	0	0	0	0	0	0	0	0	0	0	0	0	0	0	0	0	0	0	0	0	0	0	0	0	0	0	0	0	0	0	0	0
Zotu158	0	1	0	0	101	0	0	0	0	0	0	0	0	1133	0	0	0	145	1	0	0	0	0	0	1	0	0	23	20	0	0	0	0	0	0	0	0	0	0	0	0	1	0	0	0	0	0	0	0
Zotu1580	0	0	0	0	0	0	0	0	0	0	0	0	0	0	0	0	0	0	0	0	0	0	0	0	0	0	0	0	0	0	0	0	0	0	0	0	0	0	0	0	0	0	0	0	0	0	0	0	0
Zotu1581	0	0	0	0	0	0	0	0	0	0	0	0	0	0	0	0	0	0	0	0	0	0	0	0	0	0	0	0	0	0	0	0	0	0	0	0	0	0	0	0	0	0	0	0	0	0	0	0	0
Zotu1582	0	0	0	0	0	0	0	0	0	0	0	0	0	0	0	0	0	0	0	0	0	0	0	0	0	0	0	0	0	0	0	0	0	0	0	0	0	0	0	0	0	0	0	0	0	0	0	0	0
Zotu1583	0	0	0	0	0	0	0	0	0	0	0	0	0	0	0	0	0	0	0	0	0	0	0	0	0	0	0	0	0	0	0	0	0	0	0	0	0	0	0	0	0	0	0	0	0	0	0	0	0
Zotu1584	0	0	0	0	0	0	0	0	0	0	0	0	0	0	0	0	0	0	0	0	0	0	0	0	0	0	0	0	0	0	0	0	0	0	0	0	0	0	0	0	0	0	0	0	0	0	0	0	0
Zotu1585	0	0	0	0	0	0	0	0	0	0	0	0	0	0	0	0	0	0	0	0	0	0	0	0	0	0	0	0	0	0	0	0	0	0	0	0	0	0	0	0	0	0	0	0	0	0	0	0	0
Zotu1586	0	0	0	0	0	0	0	0	0	0	0	0	0	0	0	0	0	0	0	0	0	0	0	0	0	0	0	0	0	0	0	0	0	0	0	0	0	0	0	0	0	0	0	0	0	0	0	0	0
Zotu1587	0	0	0	0	0	0	0	0	0	0	0	0	0	0	0	0	0	0	0	0	0	0	0	0	0	0	0	0	0	0	0	0	0	0	0	0	0	0	0	0	0	0	0	0	0	0	0	0	0
Zotu1588	0	0	0	0	0	0	0	0	0	0	0	0	0	0	0	0	0	0	0	0	0	0	0	0	0	0	0	0	0	0	0	0	0	0	0	0	0	0	0	0	0	0	0	0	0	0	0	0	0
Zotu1589	0	0	0	0	0	0	0	0	0	0	0	0	0	0	0	0	0	0	0	0	0	0	0	0	0	0	0	0	0	0	0	0	0	0	0	0	0	0	0	0	0	0	0	0	0	0	0	0	0
Zotu159	0	0	0	0	0	0	0	0	0	0	0	0	0	0	0	0	0	0	1	0	0	0	0	0	0	0	0	0	15	0	0	0	0	0	0	0	0	0	0	0	0	0	0	0	0	0	0	0	0
Zotu1590	0	0	0	0	0	0	0	0	0	0	0	0	0	0	0	0	0	0	0	0	0	0	0	0	0	0	0	0	0	0	0	0	0	0	0	0	0	0	0	0	0	0	0	0	0	0	0	0	0
Zotu1591	0	0	0	0	0	0	0	0	0	0	0	0	0	0	0	0	0	0	0	0	0	0	0	0	0	0	0	0	0	0	0	0	0	0	0	0	0	0	0	0	0	0	0	0	0	0	0	0	0
Zotu1592	0	0	0	0	0	1	0	0	0	0	0	0	0	0	0	0	0	0	0	0	0	0	0	0	0	0	0	0	0	0	0	0	0	0	0	0	0	0	0	0	0	0	0	0	0	0	0	0	0
Zotu1593	0	0	0	0	0	0	0	0	0	0	0	0	0	0	0	0	0	0	0	0	0	0	0	0	0	0	0	0	0	0	0	0	0	0	0	0	0	0	0	0	0	0	0	0	0	0	0	0	0
Zotu1594	0	0	0	0	0	0	0	0	0	0	0	0	0	0	0	0	0	0	0	0	0	0	0	0	0	0	0	0	0	0	0	0	0	0	0	0	0	0	0	0	0	0	0	0	0	0	0	0	0
Zotu1595	0	0	0	0	0	0	0	0	0	0	0	0	0	0	0	0	0	0	0	0	0	0	0	0	0	0	0	0	0	0	0	0	0	0	0	0	0	0	0	0	0	0	0	0	0	0	0	0	0
Zotu1596	0	0	0	0	0	0	0	0	0	0	0	0	0	0	0	0	0	0	0	0	0	0	0	0	0	0	0	0	0	0	0	0	0	0	0	0	0	0	0	0	0	0	0	0	0	0	0	0	0
Zotu1597	0	0	0	0	0	0	0	0	0	0	0	0	0	0	0	0	0	0	0	0	0	0	0	0	0	0	0	0	0	0	0	0	0	0	0	0	0	0	0	0	0	0	0	0	0	0	0	0	0
Zotu1598	0	0	0	0	0	0	0	0	0	0	0	0	0	0	0	0	0	0	0	0	0	0	0	0	0	0	0	0	0	0	0	0	0	0	0	0	0	0	0	0	0	0	0	0	0	0	0	0	0
Zotu1599	0	0	0	0	0	0	0	0	0	0	0	0	0	0	0	0	0	0	0	0	0	0	0	0	0	0	0	0	0	0	0	0	0	0	0	0	0	0	0	0	0	0	0	0	0	0	0	0	0
Zotu16	2915	2216	4	240	6	782	0	5	1	3	2	0	0	25	1427	4	2	0	1	3	2	5	79	11	1	4488	2	102	7	3	247	3	2	0	0	4	478	745	5	20	3	1094	2	1240	0	352	1380	475	747
Zotu160	0	0	0	0	2	0	0	0	0	2	0	0	0	3	0	0	1	1	0	0	0	0	0	0	0	0	0	0	668	0	0	0	2	0	0	0	0	0	0	0	0	0	0	0	0	0	0	1	1
Zotu1600	0	0	0	0	0	0	0	0	0	0	0	0	0	0	0	0	0	0	0	0	0	0	0	0	0	0	0	0	0	0	0	0	0	0	0	0	0	0	0	0	0	0	0	0	0	0	0	0	0
Zotu1601	0	0	0	0	0	0	0	0	0	0	0	0	0	0	0	0	0	0	0	0	0	53	0	0	0	0	0	0	0	0	0	0	0	0	0	0	0	0	0	0	0	0	0	0	0	0	0	0	0
Zotu1602	0	0	0	0	0	0	0	0	0	0	0	0	0	0	0	0	0	0	0	0	0	0	0	0	0	0	0	0	0	0	0	0	0	0	0	0	0	0	0	0	0	0	0	0	0	0	0	0	0
Zotu1603	0	0	0	0	0	0	0	0	0	0	0	0	0	0	0	0	0	0	0	0	0	0	0	0	0	0	0	0	0	0	0	0	0	0	0	0	0	0	0	0	0	0	0	0	0	0	0	0	0
Zotu1604	0	0	0	0	0	0	0	0	1	0	0	0	0	0	0	0	0	0	0	0	0	0	0	0	0	0	0	0	0	0	0	0	0	0	0	0	0	0	0	0	0	0	0	0	0	0	0	0	0
Zotu1605	0	0	0	0	0	0	0	0	0	1	0	0	0	0	0	0	0	0	0	0	0	0	0	0	0	0	0	0	0	0	0	0	9	0	0	0	0	0	0	0	0	0	0	0	0	0	0	0	0
Zotu1606	0	0	0	0	0	0	0	0	0	0	0	0	0	0	0	0	0	0	0	0	0	0	0	0	0	0	0	0	0	0	0	0	0	0	0	0	0	0	0	0	0	0	0	0	0	0	0	0	0
Zotu1607	0	0	0	0	0	0	0	0	0	0	0	0	0	0	0	0	0	0	0	0	0	0	0	0	0	0	0	0	0	0	0	0	0	0	0	0	0	0	0	0	0	0	0	0	0	0	0	0	0
Zotu1608	0	0	0	0	0	0	0	0	0	0	0	0	0	0	0	0	0	0	0	0	0	0	0	0	0	0	0	0	0	0	0	0	0	0	0	0	0	0	0	0	0	0	0	0	0	0	0	0	0
Zotu1609	0	0	0	0	0	0	0	0	0	0	0	0	0	0	0	0	0	0	0	0	0	0	0	0	0	0	0	0	0	0	0	0	0	0	0	0	0	0	0	0	0	0	0	0	0	0	0	1	0
Zotu161	0	0	0	1	3	0	1	3	2	4	0	1	0	1	1	1	0	1	2	7	3	0	6	0	4	0	4	1	0	0	2	4	0	0	0	0	4	2	0	1	2	1	1	0	0	1	3	1	20
Zotu1610	0	0	0	0	0	0	0	0	0	0	0	0	0	0	0	0	0	0	0	0	0	0	0	0	0	0	0	0	0	0	0	0	0	0	0	0	0	0	0	0	0	0	0	0	0	0	0	0	0
Zotu1611	0	0	0	0	0	0	0	0	0	0	0	0	0	0	0	0	0	0	0	0	0	0	0	0	0	0	0	0	12	0	0	0	0	0	0	0	0	0	0	0	0	0	0	0	0	0	0	0	0
Zotu1612	0	0	0	0	0	0	0	0	0	0	0	0	0	0	0	0	0	0	0	0	0	0	0	0	0	0	0	0	0	0	0	0	0	0	0	0	0	0	0	0	0	0	0	0	0	0	0	0	0
Zotu1613	0	0	0	0	0	0	0	0	0	0	0	0	0	0	0	0	0	0	0	0	0	0	0	0	0	0	0	0	0	0	0	0	0	0	0	0	0	0	0	0	0	0	0	0	0	0	0	0	0
Zotu1614	0	0	0	0	0	0	0	0	0	0	0	0	0	0	0	0	0	0	0	0	0	0	0	0	0	0	0	0	0	0	0	0	0	0	0	0	0	0	0	0	0	0	0	0	0	0	0	0	0
Zotu1615	0	0	0	0	0	0	0	0	0	0	0	0	0	0	0	0	0	0	0	0	0	0	0	0	0	0	0	0	0	0	0	0	0	0	0	0	0	0	0	0	0	0	0	0	0	0	0	0	0
Zotu1616	0	0	0	0	0	0	0	0	0	0	0	0	0	0	0	0	0	0	0	0	0	0	0	0	0	0	0	0	0	0	0	0	0	0	0	0	0	0	0	0	0	0	0	0	0	0	0	0	0
Zotu1617	0	0	0	0	0	0	0	0	0	0	0	0	0	0	0	0	0	0	0	0	0	0	0	0	0	0	0	0	0	0	0	0	0	0	0	0	0	0	0	0	0	0	0	0	0	0	0	0	0
Zotu1618	0	0	0	0	0	0	0	0	0	0	0	0	0	0	0	0	0	0	0	0	0	0	90	0	0	0	0	0	0	0	0	0	0	0	0	0	0	0	0	0	0	0	0	0	0	0	0	0	0
Zotu1619	0	0	0	0	0	0	0	0	0	0	0	0	0	0	0	0	0	0	0	0	0	0	0	0	0	0	0	0	0	0	0	0	0	0	0	0	0	0	0	0	0	0	0	0	0	0	0	0	0
Zotu162	0	0	0	0	0	0	0	0	0	0	0	0	0	0	0	0	0	0	0	0	0	0	0	0	0	0	0	0	0	0	0	0	0	0	0	0	0	0	0	0	0	0	0	0	0	0	0	0	0
Zotu1620	0	0	0	0	0	0	0	0	0	0	0	0	0	0	0	0	0	0	0	0	0	0	0	0	0	0	0	0	0	0	0	0	0	0	0	0	0	0	0	0	0	0	0	0	0	0	0	0	0
Zotu1621	0	0	0	0	0	0	0	0	0	0	0	0	0	0	0	0	0	0	0	0	0	0	0	0	0	0	0	132	0	0	0	0	0	0	0	0	0	0	0	0	0	0	0	0	0	0	0	0	0
Zotu1622	0	0	0	0	0	0	0	0	0	0	0	0	0	0	0	0	0	0	0	0	0	0	0	0	0	0	0	0	0	0	0	0	0	0	0	0	0	0	0	0	0	0	0	0	0	0	0	0	0
Zotu1623	0	0	0	0	0	0	0	0	0	0	0	0	0	0	0	0	0	0	0	0	0	0	0	0	0	0	0	0	0	0	0	0	0	0	0	0	0	0	0	0	0	0	0	0	0	0	0	0	0
Zotu1624	0	0	0	0	0	0	0	0	0	0	0	0	0	0	0	0	0	0	0	0	0	0	0	0	0	0	0	0	0	0	0	0	0	0	0	0	0	0	0	0	0	0	0	0	0	0	0	0	0
Zotu1625	0	0	0	0	0	0	0	0	0	0	0	0	0	0	0	0	0	0	0	0	0	0	0	0	0	0	0	0	0	0	0	0	0	0	0	0	0	0	0	0	0	0	0	0	0	0	0	0	0
Zotu1626	0	0	0	0	0	0	0	0	0	0	0	0	0	0	0	0	0	0	0	0	0	0	0	0	0	0	0	0	0	0	0	0	0	0	0	0	0	0	0	1	0	0	0	0	0	0	0	0	0
Zotu1627	0	0	0	0	0	0	0	0	0	0	0	0	0	0	0	0	0	0	0	0	0	0	0	0	0	0	0	0	0	0	0	0	0	0	0	0	0	0	0	1	0	0	0	0	0	0	0	0	0
Zotu1628	0	0	0	0	0	0	0	0	0	0	0	0	0	0	0	0	0	0	0	0	0	0	0	0	0	0	0	0	0	0	0	0	0	0	0	0	0	0	0	0	0	0	0	0	0	0	0	0	0
Zotu1629	0	0	0	0	0	0	0	0	0	0	0	0	0	0	0	0	0	0	0	0	0	0	0	0	0	0	0	0	0	0	0	0	0	0	0	0	0	0	0	0	0	0	0	0	0	0	0	0	0
Zotu163	0	0	0	0	0	0	0	4	0	0	0	0	0	0	0	0	0	0	2	0	0	0	0	0	0	0	0	0	0	0	1	0	0	0	0	0	0	0	0	0	0	0	1	0	0	0	0	2	908
Zotu1630	0	0	0	0	0	0	0	0	0	0	0	0	0	0	0	0	0	0	0	0	0	0	0	0	0	0	0	0	0	0	0	0	0	0	0	0	0	0	0	0	0	0	0	0	0	0	0	0	0
Zotu1631	0	0	0	0	0	0	0	0	0	0	0	0	0	0	0	0	0	0	0	0	0	0	0	0	0	0	0	0	0	0	0	0	0	0	0	0	0	0	0	0	0	0	0	0	0	0	0	0	0
Zotu1632	0	0	0	0	0	0	0	0	0	0	0	0	0	0	0	0	0	0	0	0	0	0	0	0	0	0	0	0	0	0	0	0	0	0	0	0	0	0	0	0	0	0	0	0	0	0	0	0	0
Zotu1633	0	0	0	0	0	0	0	0	0	0	0	0	0	0	0	0	0	0	0	0	0	0	0	0	0	0	0	0	0	0	0	0	0	0	0	0	0	0	0	0	0	0	0	0	0	0	0	0	0
Zotu1634	0	0	0	0	0	0	0	0	0	0	0	0	0	0	0	0	0	0	0	0	0	0	0	0	0	0	0	0	0	0	0	0	0	0	0	0	0	0	0	0	0	0	0	0	0	0	0	0	0
Zotu1635	0	0	0	0	0	0	0	0	0	0	0	0	0	0	0	0	0	0	0	0	0	0	0	0	0	0	0	0	0	0	0	0	0	0	0	0	0	0	0	0	0	0	0	0	0	0	0	0	0
Zotu1636	0	0	0	0	0	0	0	0	0	0	0	0	0	0	0	0	0	0	0	0	0	0	0	0	0	0	0	0	0	0	0	0	0	0	0	0	0	0	0	0	0	0	0	0	0	0	0	0	0
Zotu1637	0	0	0	0	0	0	0	0	0	0	0	0	0	0	0	0	0	0	0	0	0	0	0	0	0	0	0	0	18	0	0	0	0	0	0	0	0	0	0	0	0	0	0	0	0	0	0	0	0
Zotu1638	0	0	0	0	0	0	0	0	0	0	0	0	0	0	0	0	0	0	0	0	0	0	0	0	0	0	0	0	0	0	0	0	0	0	0	0	0	0	0	0	0	0	0	0	0	0	0	0	0
Zotu1639	0	0	0	0	0	0	0	0	0	0	0	0	0	0	0	0	0	0	0	0	0	0	0	0	0	0	0	0	0	0	0	0	0	0	0	0	0	0	0	0	0	0	0	0	0	0	0	0	0
Zotu164	0	0	0	1	0	0	0	0	0	0	0	0	0	0	0	0	0	0	0	0	0	0	126	0	0	0	2	2	55	0	1	0	0	0	0	0	0	0	0	0	0	0	0	1	0	0	0	0	0
Zotu1640	0	0	0	0	0	0	0	0	0	0	0	0	0	0	0	0	0	0	0	0	0	0	0	0	0	0	0	0	0	0	0	0	0	0	0	0	0	0	0	0	0	0	0	0	0	0	0	0	0
Zotu1641	0	0	0	0	0	0	0	0	0	0	0	2	0	0	0	0	0	0	13	0	0	0	0	0	0	0	0	9	0	0	0	0	0	0	0	0	0	0	0	0	3	0	0	0	0	0	0	0	12
Zotu1642	0	0	0	0	0	0	0	0	0	0	0	0	0	0	0	0	0	0	0	0	0	0	0	0	0	0	0	0	0	0	0	0	0	0	0	0	0	0	0	0	0	0	0	0	0	0	0	0	0
Zotu1643	0	0	0	0	0	0	0	0	0	0	0	0	0	0	0	0	0	0	0	0	0	0	0	0	0	0	0	0	0	0	0	0	0	0	0	0	0	0	0	0	0	0	0	0	0	0	0	0	0
Zotu1644	0	0	0	0	0	0	0	0	0	0	0	0	0	0	0	0	0	0	0	0	0	0	0	0	0	0	0	0	0	0	0	0	0	0	0	0	0	0	0	0	0	0	0	0	0	0	0	0	0
Zotu1645	0	0	0	0	0	0	0	0	0	0	0	0	0	0	0	0	0	0	0	0	0	70	0	0	0	0	0	0	0	0	0	0	0	0	0	0	0	0	0	0	0	0	0	0	0	0	0	0	0
Zotu1646	0	0	0	0	0	0	0	0	0	0	0	0	0	0	0	0	0	0	0	0	0	0	0	0	0	0	0	0	0	0	0	0	0	0	0	0	0	0	0	0	0	0	0	0	0	0	0	0	0
Zotu1647	0	0	0	0	0	0	0	0	0	0	0	0	0	0	0	0	0	0	0	0	11	0	0	0	0	0	0	0	0	0	0	1	0	0	0	0	0	9	0	0	0	0	0	12	0	5	17	1	0
Zotu1648	0	0	0	0	0	0	0	0	0	0	0	0	0	0	0	0	0	0	0	0	0	0	0	0	0	0	0	0	0	0	0	0	0	0	0	0	0	0	0	0	0	0	0	0	0	0	0	0	0
Zotu1649	0	0	0	0	0	0	0	0	0	0	0	0	0	0	0	0	0	0	0	0	0	0	0	0	0	0	0	0	0	0	0	0	0	0	0	0	0	0	0	0	0	0	0	0	0	0	0	0	0
Zotu165	0	0	0	0	0	0	0	0	0	0	0	0	0	0	0	0	0	0	0	0	0	0	0	0	0	0	0	0	198	0	0	0	0	0	0	0	0	0	0	0	0	0	0	0	0	0	1	0	0
Zotu1650	0	0	0	0	0	0	0	0	0	0	0	0	0	0	0	0	0	0	0	0	0	0	0	0	0	0	0	0	0	0	0	0	0	0	0	0	0	0	0	0	0	0	0	0	0	0	0	0	0
Zotu1651	0	0	0	1	0	0	0	0	0	0	0	0	0	0	0	0	0	0	0	0	0	0	0	0	0	0	0	0	0	0	0	0	0	0	0	0	0	0	0	0	0	0	0	0	0	0	0	0	0
Zotu1652	212	0	0	1	0	0	0	0	0	0	0	0	0	0	0	0	0	0	0	0	0	0	0	0	1	1	0	0	0	0	0	0	0	0	0	0	0	0	0	0	0	0	0	0	0	0	0	0	0
Zotu1653	0	0	0	0	0	0	0	0	0	0	0	0	0	0	0	0	0	0	0	0	0	0	0	0	0	0	0	0	0	0	0	0	0	0	0	0	0	0	0	0	0	0	0	0	0	0	0	0	0
Zotu1654	0	0	0	0	0	7	0	0	0	0	0	0	0	0	0	0	0	0	1	0	0	0	0	0	0	0	0	0	0	0	0	0	0	0	0	0	0	0	0	0	0	0	0	0	0	0	0	0	0
Zotu1655	0	0	0	0	0	0	0	0	0	0	0	0	0	0	0	0	0	0	0	0	0	0	0	0	0	0	0	0	0	0	0	0	0	29	0	0	0	0	0	0	0	0	159	0	0	0	0	0	0
Zotu1656	0	0	0	0	0	0	0	0	0	0	0	0	0	0	0	0	0	0	0	0	0	0	0	0	0	0	0	0	0	0	0	0	0	0	0	0	0	0	0	0	0	0	0	0	0	0	0	0	0
Zotu1657	0	0	0	0	0	0	0	0	0	0	0	0	0	0	101	0	0	0	0	0	0	0	0	0	0	0	0	0	0	0	0	0	0	0	0	0	0	0	0	0	1	0	0	0	0	0	0	0	0
Zotu1658	0	0	0	0	0	0	0	0	0	128	0	0	0	0	0	0	0	0	0	0	0	0	0	0	0	0	0	0	0	0	0	0	0	0	0	0	0	0	0	0	0	0	0	0	0	0	0	0	0
Zotu1659	0	0	0	0	0	0	0	0	0	0	0	0	0	0	0	0	0	2	0	0	0	0	0	0	0	0	0	0	0	0	0	0	0	0	0	0	0	0	0	0	0	0	0	0	0	0	0	0	0
Zotu166	0	0	0	0	0	0	0	0	0	0	0	0	0	1	0	0	0	40	0	0	0	0	0	0	0	0	0	0	0	0	0	0	0	0	0	0	0	0	0	0	0	0	0	0	0	0	0	0	0
Zotu1660	0	0	0	0	0	0	0	0	0	0	0	0	0	0	0	0	0	0	0	0	0	0	0	0	0	0	0	0	0	0	0	0	0	0	0	0	0	0	0	0	0	0	0	0	0	0	0	0	0
Zotu1661	0	0	0	0	0	0	0	0	0	0	0	0	0	0	0	0	0	0	0	0	0	0	0	0	0	0	0	0	0	0	0	0	0	0	0	0	0	0	0	0	0	0	0	0	0	0	0	0	0
Zotu1662	0	0	0	0	0	0	0	0	0	0	0	0	0	0	0	0	0	0	0	0	0	0	0	0	0	0	0	0	0	0	0	0	0	0	0	0	0	0	0	0	0	0	0	0	0	0	0	0	0
Zotu1663	0	0	0	0	0	0	0	0	0	0	0	0	0	0	0	0	0	0	0	0	0	0	0	0	0	0	0	0	0	0	0	0	0	0	0	0	0	0	0	0	0	0	0	0	0	0	0	0	0
Zotu1664	0	0	0	0	0	0	0	0	0	0	0	0	0	0	0	0	0	0	0	0	0	0	0	0	0	0	0	0	0	0	0	0	0	0	0	0	0	0	0	0	0	0	0	0	0	0	0	0	0
Zotu1665	0	0	0	0	0	0	0	0	0	0	0	0	0	0	0	0	0	0	0	0	0	0	0	0	0	0	0	0	0	0	0	0	0	0	0	0	0	0	0	0	0	0	0	0	0	0	0	0	0
Zotu1666	0	0	0	0	0	0	0	0	0	0	0	0	0	0	0	0	0	0	0	0	0	0	0	0	0	0	0	0	0	0	0	0	0	0	0	0	0	0	0	0	0	0	0	0	0	0	0	0	0
Zotu1667	0	0	0	0	0	0	0	0	0	0	0	0	0	0	0	0	0	0	0	0	0	0	0	0	0	0	0	0	0	0	0	0	0	0	0	0	0	0	0	0	0	0	0	0	0	0	0	0	0
Zotu1668	0	7	0	0	0	3	0	0	0	0	0	0	0	0	0	0	0	0	0	0	0	0	0	0	0	0	0	0	0	0	0	0	0	0	0	0	1	1	0	0	0	2	0	0	0	2	4	1	4
Zotu1669	0	0	0	0	0	0	0	0	0	0	0	0	0	0	0	0	0	0	0	0	0	0	0	0	0	0	0	0	0	0	0	0	0	0	0	0	0	0	0	0	0	0	0	0	0	0	0	0	0
Zotu167	0	0	0	0	0	0	0	0	0	0	0	0	0	0	0	0	0	19	0	0	0	0	4	0	0	0	1	0	0	0	0	0	0	0	0	0	0	4	0	0	0	0	0	1	0	0	0	0	0
Zotu1670	0	0	0	0	0	0	0	0	0	0	0	0	0	0	0	0	0	0	0	0	0	0	0	0	0	0	0	0	1	0	0	0	0	0	0	0	0	0	0	0	0	0	0	0	0	0	0	0	0
Zotu1671	0	0	0	0	0	0	0	0	0	0	0	0	0	0	0	0	0	0	0	0	0	0	0	0	0	0	0	0	0	0	0	0	0	0	0	0	0	0	65	0	0	0	0	0	0	0	0	0	0
Zotu1672	0	1	0	0	0	0	0	0	0	0	0	0	0	0	0	1	0	0	0	0	0	0	0	0	0	0	0	0	0	0	0	0	0	0	0	0	0	0	0	0	0	0	0	0	0	0	0	0	0
Zotu1673	0	0	0	0	0	0	0	0	0	0	0	0	0	0	0	0	0	0	0	0	0	0	0	0	0	0	0	0	0	0	0	0	0	0	0	0	0	0	0	0	0	0	0	0	0	0	0	0	0
Zotu1674	0	0	0	0	0	0	0	0	0	0	0	0	0	0	0	0	0	0	0	0	0	0	0	0	0	0	0	0	0	0	0	0	0	0	0	0	0	0	0	0	0	0	0	0	0	0	0	0	0
Zotu1675	0	0	0	0	0	0	0	0	0	0	0	0	0	0	0	0	0	0	0	0	0	0	0	0	0	0	0	0	0	0	0	0	0	0	0	0	0	0	0	0	0	0	0	0	0	0	0	0	0
Zotu1676	0	0	0	0	0	0	0	0	0	0	0	0	0	0	0	0	0	0	0	0	0	0	0	0	0	0	0	0	0	0	0	0	0	0	0	0	0	0	0	0	0	0	0	0	0	0	0	0	0
Zotu1677	0	0	0	0	0	0	0	0	0	0	0	0	0	0	0	0	0	0	0	0	0	0	0	0	0	0	0	0	0	0	0	0	0	0	0	0	0	0	0	0	0	0	0	0	0	0	0	0	0
Zotu1678	0	0	0	0	0	0	0	0	0	0	0	0	0	0	0	0	0	0	0	0	0	0	1	0	0	0	0	0	0	0	0	0	0	0	0	0	0	0	0	0	0	0	0	0	0	0	0	0	0
Zotu1679	0	0	0	0	0	0	0	0	0	0	0	0	0	0	0	0	0	0	0	0	0	0	0	0	0	0	0	0	0	0	0	0	0	0	0	0	0	0	0	0	0	0	0	0	0	0	0	0	0
Zotu168	0	0	0	0	0	0	0	0	0	0	0	0	0	0	3	0	0	0	0	0	0	0	0	0	0	0	0	0	1	1	0	0	2	0	0	0	0	0	0	0	3	0	0	0	1	0	0	0	0
Zotu1680	0	0	0	0	0	0	0	0	0	0	0	0	0	0	0	0	0	0	0	0	0	0	0	0	0	0	0	0	0	0	0	0	0	0	0	0	0	0	0	0	0	0	0	0	0	0	0	0	0
Zotu1681	0	0	0	0	0	0	0	0	0	0	0	0	0	0	0	0	0	0	0	0	0	0	0	0	0	0	0	0	0	0	0	0	0	0	0	0	0	0	0	0	0	0	0	0	0	0	0	0	0
Zotu1682	0	0	0	0	0	0	0	0	0	0	0	0	0	0	0	0	0	0	0	0	0	0	0	0	0	0	0	0	0	0	0	0	0	0	0	0	0	0	0	0	0	0	0	0	0	0	0	0	0
Zotu1683	0	0	0	0	0	0	0	0	0	0	0	0	0	0	0	0	0	0	0	0	0	0	0	0	0	0	0	0	0	0	0	0	0	0	0	0	0	0	0	0	0	0	0	0	0	0	0	0	0
Zotu1684	0	0	0	0	0	0	0	0	0	0	0	0	0	0	0	0	0	0	0	0	0	0	0	0	0	0	0	0	0	0	0	0	0	0	0	0	0	0	0	0	0	0	0	0	0	0	0	0	0
Zotu1685	0	0	0	0	0	0	0	0	0	0	0	0	0	0	0	0	0	0	0	0	0	0	0	0	0	0	0	0	0	0	0	0	0	0	0	0	0	0	0	0	0	0	0	0	0	0	0	0	0
Zotu1686	0	0	0	0	0	0	0	0	0	0	0	0	0	0	0	0	0	0	0	0	0	0	0	0	0	0	0	0	0	0	0	0	0	0	0	0	0	0	0	0	0	0	0	0	0	0	0	0	0
Zotu1687	0	0	0	0	0	0	0	0	0	0	0	0	0	0	0	0	0	0	0	0	0	0	0	0	0	0	0	0	0	0	0	0	0	0	0	0	0	0	0	0	0	0	0	0	0	0	0	0	0
Zotu1688	0	0	0	0	0	0	0	0	0	0	0	0	0	0	0	0	0	0	0	0	0	0	0	0	0	0	0	0	0	0	0	0	0	0	0	0	0	0	0	0	0	0	0	0	0	0	0	0	0
Zotu1689	0	0	0	0	0	0	0	0	0	0	0	0	0	0	0	0	0	0	0	0	0	0	0	0	0	0	0	0	0	0	0	0	0	0	0	0	0	0	0	0	0	0	0	0	0	0	0	0	0
Zotu169	0	0	0	0	0	0	0	0	0	0	0	0	1	0	0	0	0	0	0	0	1	0	0	0	0	0	0	0	0	0	0	0	0	0	0	0	0	0	0	0	0	0	0	2	0	0	0	0	0
Zotu1690	0	0	0	0	0	0	0	0	0	0	0	0	0	0	0	0	0	0	0	0	0	0	0	0	0	0	0	0	0	0	0	0	0	0	0	0	0	0	0	0	0	0	0	0	0	0	0	0	0
Zotu1691	0	0	0	0	0	0	0	0	0	0	0	0	0	0	0	0	0	0	0	0	0	0	0	0	0	0	0	0	0	0	0	0	0	0	0	0	0	0	0	0	0	0	0	0	0	0	0	0	0
Zotu1692	0	0	0	0	0	0	0	0	0	0	0	0	0	0	0	0	0	0	0	0	0	0	0	0	0	0	0	0	0	0	0	0	0	0	0	0	0	0	0	0	0	0	0	0	0	0	0	0	0
Zotu1693	0	0	0	0	0	0	0	0	0	0	0	0	0	0	0	0	0	0	0	0	0	0	0	0	0	0	0	0	0	0	0	0	0	0	0	0	0	0	0	0	0	0	0	0	0	0	0	0	0
Zotu1694	0	0	0	0	0	0	0	0	0	0	0	0	0	0	0	0	0	0	0	0	0	0	0	0	0	0	0	0	0	0	0	0	0	0	0	0	0	0	0	0	0	0	0	0	0	0	0	0	0
Zotu1695	0	0	0	0	0	0	0	0	0	0	0	0	0	0	0	0	0	0	0	0	0	0	0	0	0	0	0	0	13	0	0	0	0	0	0	0	0	0	0	0	0	0	0	0	0	0	0	0	0
Zotu1696	0	0	0	0	0	0	0	0	0	0	0	0	0	0	0	0	0	0	0	0	0	0	0	0	0	0	0	0	0	0	0	0	0	0	0	0	0	0	0	0	0	0	0	0	0	0	0	0	0
Zotu1697	0	0	0	0	0	0	0	0	0	0	0	0	0	0	0	0	0	0	0	0	0	0	0	0	0	0	0	0	0	0	0	0	0	0	0	0	0	0	0	0	0	0	0	0	0	0	0	0	0
Zotu1698	0	0	0	0	0	0	0	0	0	0	0	0	0	0	0	0	0	0	0	0	0	0	0	0	0	0	0	0	0	0	0	0	0	0	0	0	0	0	0	0	0	0	0	0	0	0	0	0	0
Zotu1699	0	0	0	0	0	0	0	0	0	0	0	0	0	0	0	0	0	0	0	0	0	0	0	0	0	0	0	0	0	0	0	0	0	0	0	0	0	0	0	0	0	0	0	0	0	0	0	0	0
Zotu17	8	0	4	1344	364	9	9	0	0	0	5	0	2	3	1	6	0	224	0	10225	1	8	0	5	3	1	1	0	2	0	0	0	0	1	2	9	0	0	6	3	1	0	0	0	2	1	0	0	0
Zotu170	0	1	0	0	0	0	0	0	1	0	0	0	0	0	0	0	0	0	0	0	3	0	0	0	0	0	53	0	0	0	0	0	0	0	0	1	0	0	0	0	0	0	0	0	0	0	0	0	0
Zotu1700	0	0	1	0	0	0	0	0	0	0	0	0	0	0	0	0	0	0	0	0	0	0	0	0	0	0	0	0	0	0	0	0	0	0	0	0	0	0	0	0	0	0	0	0	0	0	0	0	0
Zotu1701	0	0	0	0	0	0	0	0	0	0	0	0	0	0	0	0	0	0	0	0	0	0	0	0	0	0	0	0	0	0	0	0	0	0	0	0	0	0	0	0	0	0	0	0	0	0	0	0	0
Zotu1702	0	0	0	0	0	0	0	0	0	0	0	0	0	0	0	0	0	0	0	0	0	0	0	0	0	0	0	0	0	0	0	0	0	0	0	0	0	0	0	0	0	0	0	0	0	0	0	0	0
Zotu1703	0	0	0	0	0	0	0	0	0	0	0	0	0	0	0	0	0	0	0	0	0	0	0	0	0	0	0	0	0	0	0	0	0	0	0	0	0	0	0	0	0	0	0	0	0	0	0	0	0
Zotu1704	0	0	0	0	0	0	0	0	0	0	0	0	0	0	0	0	0	0	0	0	0	0	0	0	0	0	0	0	0	0	0	0	0	0	0	0	0	0	0	0	0	0	0	0	0	0	0	0	0
Zotu1705	0	0	0	0	0	0	0	0	0	0	0	0	0	0	0	0	0	0	0	0	0	0	0	0	0	0	0	0	0	0	0	0	0	0	0	0	0	0	0	0	0	0	0	0	0	0	0	0	0
Zotu1706	0	0	0	0	0	0	0	0	0	0	0	0	0	0	0	0	0	0	0	0	0	0	0	0	0	0	0	0	0	0	0	0	0	0	0	0	0	0	0	0	0	0	0	0	0	0	0	0	0
Zotu1707	0	0	0	0	0	0	0	0	0	0	0	0	0	0	0	0	0	0	0	0	0	0	0	0	0	0	0	0	0	0	0	0	0	0	0	0	0	0	0	0	0	0	0	0	0	0	0	0	0
Zotu1708	0	0	0	0	0	0	0	0	0	0	0	0	0	0	0	0	0	0	0	0	0	0	0	0	0	0	0	0	0	0	0	0	0	0	0	0	0	0	0	0	0	0	0	0	0	0	0	0	0
Zotu1709	0	0	0	0	0	0	0	0	0	0	0	0	0	0	0	0	0	0	0	0	0	0	0	0	0	0	0	0	0	0	0	0	0	0	0	0	0	0	0	0	0	0	0	0	0	0	0	0	0
Zotu171	4	0	0	0	0	0	0	14	0	4	0	0	0	0	0	1	0	0	0	0	0	0	0	0	0	0	0	0	0	0	0	0	0	0	0	0	0	0	0	0	0	0	0	0	2	0	0	0	0
Zotu1710	0	0	0	0	0	0	0	0	0	0	0	0	0	0	0	0	0	0	0	0	0	0	0	0	0	0	0	0	0	0	0	0	0	0	0	0	0	0	0	0	0	0	0	0	0	0	0	0	0
Zotu1711	0	0	0	0	0	0	0	0	0	0	0	0	0	0	0	0	0	0	0	0	0	0	0	0	0	0	0	0	0	0	0	0	0	0	0	0	0	0	0	0	0	0	0	0	0	0	0	0	0
Zotu1712	0	0	0	0	0	0	0	0	0	0	0	0	0	0	0	0	0	0	0	0	0	0	21	0	0	0	0	0	1	0	0	0	0	0	0	0	0	0	0	0	0	0	0	0	0	0	0	0	0
Zotu1713	0	0	0	0	0	0	0	0	0	0	0	0	0	0	0	1	0	0	0	0	0	0	0	0	0	0	0	0	0	0	0	0	0	0	0	0	0	0	0	0	0	0	0	0	0	0	0	0	0
Zotu1714	1	0	15	1	0	0	0	0	0	0	0	0	0	0	0	0	0	0	0	0	0	0	4	0	0	0	0	0	0	0	0	0	0	0	0	0	0	0	0	0	0	0	0	0	0	0	0	0	0
Zotu1715	0	0	0	0	0	0	0	0	0	0	0	0	0	0	0	0	0	0	0	0	0	0	0	0	0	0	0	0	0	0	0	0	0	0	0	0	0	0	0	0	0	0	0	0	0	0	0	0	0
Zotu1716	0	0	0	0	0	0	0	0	0	0	0	0	0	0	0	0	0	0	0	0	0	0	0	0	0	0	0	0	0	0	0	0	0	0	0	0	0	0	0	0	0	0	0	0	0	0	0	0	0
Zotu1717	0	0	0	0	0	0	0	0	0	0	0	0	0	0	0	0	0	0	0	0	0	0	0	0	0	0	0	0	0	0	0	0	0	0	0	0	0	0	0	0	0	0	0	0	0	0	0	0	0
Zotu1718	0	0	0	0	0	0	0	0	0	0	0	0	0	0	0	0	0	0	0	0	0	0	0	0	0	0	0	0	0	0	0	0	0	0	0	0	0	0	0	0	0	0	0	0	0	0	0	0	0
Zotu1719	0	0	0	0	0	0	0	0	0	0	0	0	0	0	0	0	0	0	0	0	0	0	0	0	0	0	0	0	0	0	0	0	0	0	0	0	0	0	0	0	0	0	0	0	0	0	0	0	0
Zotu172	0	0	2021	0	0	0	0	0	0	0	0	0	0	0	0	0	0	0	0	0	0	0	0	1	0	0	0	0	0	0	0	0	0	0	0	0	0	0	0	0	1	0	0	0	0	0	0	0	0
Zotu1720	0	0	0	0	0	0	0	0	0	0	0	0	0	0	0	0	0	0	0	0	0	0	0	0	0	0	0	0	0	0	0	0	0	0	0	0	0	0	0	0	0	0	0	0	0	0	0	0	0
Zotu1721	0	0	0	0	0	0	0	0	0	0	0	0	0	0	0	0	0	0	0	0	0	0	0	0	0	0	0	0	0	0	0	0	0	0	0	0	0	0	0	0	0	0	0	0	0	0	0	0	0
Zotu1722	0	0	0	0	0	0	0	0	0	0	0	0	0	0	0	0	0	0	0	0	0	0	0	0	0	0	0	0	0	0	0	0	0	0	0	0	0	0	0	0	0	0	0	0	0	0	0	0	0
Zotu1723	0	0	0	0	0	0	0	0	0	0	0	0	0	0	0	0	0	0	0	0	0	0	0	0	0	0	0	0	0	0	0	0	0	0	0	0	0	0	0	0	0	0	0	0	0	0	0	0	0
Zotu1724	0	0	0	0	0	0	0	0	0	0	0	0	0	0	0	0	0	0	0	0	0	0	0	0	0	0	0	0	0	0	0	0	0	0	0	0	0	0	0	0	0	0	0	0	0	0	0	0	0
Zotu1725	0	0	0	0	0	0	0	0	0	0	0	0	0	0	0	0	0	0	0	0	0	0	0	0	0	0	0	67	0	0	0	3	0	0	0	0	0	0	0	0	0	0	0	0	0	0	0	0	0
Zotu1726	0	0	0	0	0	0	0	0	0	0	0	0	0	0	0	0	0	0	0	0	0	0	0	0	0	0	0	0	0	0	0	0	0	0	0	0	0	0	0	0	0	0	0	0	0	0	0	0	0
Zotu1727	0	0	1	0	0	1	1	0	0	0	0	0	0	0	0	1	1	0	0	0	0	0	0	0	0	0	0	0	0	0	0	0	0	0	0	0	0	0	0	0	0	0	0	0	2	0	0	0	0
Zotu1728	0	0	0	0	0	0	0	0	0	0	0	0	0	0	0	0	0	0	0	0	0	0	0	0	0	0	0	0	0	0	0	0	0	0	0	0	0	0	0	0	0	0	0	0	0	0	0	0	0
Zotu1729	0	0	0	0	0	0	0	0	0	0	0	0	0	0	0	0	0	0	0	0	0	0	0	0	0	0	0	0	0	0	0	0	0	0	0	0	0	0	0	0	0	0	0	0	0	0	0	0	0
Zotu173	2	0	0	0	0	0	0	0	0	0	0	0	0	0	0	0	0	11	0	0	0	0	0	0	0	0	0	0	0	0	0	0	0	0	0	0	0	0	0	0	0	0	0	0	0	0	0	0	0
Zotu1730	0	0	0	0	0	0	0	0	0	0	0	0	0	0	0	0	0	0	0	0	0	0	0	0	0	0	0	0	0	0	0	0	0	0	0	0	0	0	0	0	0	0	0	0	0	0	0	0	0
Zotu1731	0	0	0	0	0	0	0	0	0	0	0	0	0	0	0	0	0	0	0	0	0	0	0	0	0	0	0	0	0	0	0	0	0	0	0	0	0	0	0	0	0	0	0	0	0	0	0	0	0
Zotu1732	0	0	1	0	0	0	0	0	0	0	0	1	0	0	0	0	0	0	0	0	0	0	0	1	0	0	0	0	0	0	0	0	0	0	0	0	0	0	0	0	0	0	0	0	0	0	0	0	0
Zotu1733	0	0	0	0	0	0	0	0	0	0	0	0	0	0	0	0	0	0	0	0	0	0	0	0	0	0	0	0	0	0	0	0	0	0	0	0	0	0	0	0	0	0	0	0	0	0	0	0	0
Zotu1734	0	0	0	0	0	0	0	0	0	0	0	0	0	0	0	0	0	0	0	0	0	0	0	0	0	0	0	0	0	0	0	0	0	0	0	0	0	0	0	0	0	0	0	0	0	0	0	0	0
Zotu1735	0	0	0	0	0	0	0	0	0	0	0	0	0	0	0	0	0	0	0	0	0	0	0	0	0	0	0	0	0	0	0	0	0	0	0	0	0	0	0	0	0	0	0	0	0	0	0	0	0
Zotu1736	0	0	0	0	0	0	0	0	0	0	0	0	0	0	0	0	0	0	0	0	0	0	0	0	0	0	0	0	0	0	0	0	0	0	0	0	0	0	0	0	0	0	0	0	0	0	0	0	0
Zotu1737	0	0	0	0	0	0	0	0	0	0	0	0	0	0	0	0	0	0	0	0	0	0	0	0	0	0	0	0	0	0	0	0	0	0	0	0	0	0	0	0	0	0	0	0	0	0	0	0	0
Zotu1738	0	0	0	0	0	0	0	0	0	0	0	0	0	0	0	0	0	0	0	0	0	0	0	0	0	0	0	0	0	0	0	0	0	0	0	0	0	0	0	0	0	0	0	0	0	0	0	0	0
Zotu1739	0	0	0	0	0	0	0	0	0	0	0	0	0	0	0	0	0	0	0	0	0	0	0	0	0	0	0	0	0	0	0	0	0	0	0	0	0	0	0	0	0	0	0	0	0	0	0	0	0
Zotu174	0	0	0	0	0	0	0	0	0	0	0	0	0	0	0	0	0	0	0	0	0	0	0	0	0	0	0	0	0	0	0	0	0	0	0	0	0	1	0	0	0	0	0	1709	0	1	0	1	0
Zotu1740	0	0	0	0	0	0	0	0	0	0	0	0	0	0	0	0	0	0	0	0	0	0	0	0	0	0	0	0	0	0	0	0	0	0	0	0	0	0	0	0	0	0	0	0	0	0	0	0	0
Zotu1741	0	0	0	0	0	0	0	0	0	0	0	0	0	0	0	0	0	0	0	0	0	0	0	0	0	0	0	0	0	0	0	0	0	0	0	0	0	0	0	0	0	0	0	0	0	0	0	0	0
Zotu1742	0	0	0	0	0	0	0	0	0	77	0	0	0	0	0	0	0	0	0	0	0	0	0	0	0	0	0	0	0	0	0	0	0	0	0	0	0	0	0	0	0	0	0	0	0	0	0	0	0
Zotu1743	0	0	0	0	0	0	0	0	0	0	0	0	0	0	0	0	0	0	0	0	0	0	0	0	0	0	0	0	36	0	0	0	0	0	0	0	0	0	0	0	0	0	0	0	0	0	0	0	0
Zotu1744	0	0	0	0	0	0	0	0	0	0	0	0	1	0	0	0	0	0	0	0	2	0	0	0	0	0	0	0	0	0	0	0	0	0	0	0	0	0	0	0	0	0	31	0	0	0	0	0	0
Zotu1745	0	0	0	0	0	0	0	0	0	0	0	0	0	0	0	0	0	0	0	0	0	0	0	0	0	0	0	0	0	0	0	0	0	0	0	0	0	0	0	0	0	0	0	0	0	0	0	0	0
Zotu1746	0	0	0	0	0	0	0	0	0	0	0	0	0	0	0	0	0	0	0	0	0	0	0	0	0	0	0	0	0	0	0	0	0	0	0	0	0	0	0	0	0	0	0	0	0	0	0	0	0
Zotu1747	0	0	0	0	1	0	0	0	0	0	0	0	0	0	0	0	0	0	0	0	0	0	0	0	0	0	0	0	0	0	0	0	0	0	0	0	0	0	0	0	0	0	0	0	0	0	0	0	0
Zotu1748	0	0	0	0	0	0	0	0	0	0	0	0	0	0	0	0	0	0	0	0	0	0	0	0	0	0	0	0	0	0	0	0	0	0	0	0	0	0	0	0	0	0	0	0	0	0	0	0	0
Zotu1749	0	0	0	0	0	0	0	0	0	0	0	0	0	0	0	0	0	0	0	0	0	0	0	0	0	0	0	0	0	0	0	0	0	67	0	0	0	0	0	0	0	0	0	0	0	1	0	0	0
Zotu175	0	0	0	0	0	2	0	0	0	0	0	0	0	0	0	0	0	0	1	0	0	0	33	0	0	0	224	117	104	0	0	0	1	2	1	0	0	0	0	0	0	0	0	0	0	3	0	0	0
Zotu1750	0	0	0	0	0	98	0	0	0	0	0	0	0	0	0	0	0	0	0	0	0	0	0	0	0	0	0	0	0	0	0	0	0	0	0	0	0	0	0	0	0	0	0	0	0	0	0	0	0
Zotu1751	0	0	0	0	0	0	0	0	0	0	0	0	0	0	0	0	0	0	0	0	0	0	0	0	0	0	0	0	0	0	0	0	0	0	0	0	0	0	0	0	0	0	0	0	0	0	0	0	0
Zotu1752	0	0	0	0	0	0	0	0	0	0	0	0	0	0	0	0	0	0	0	0	0	0	0	0	0	0	0	0	0	0	0	0	0	0	0	0	0	0	0	0	0	0	0	0	0	0	0	0	0
Zotu1753	0	0	0	0	0	0	0	0	0	0	0	0	0	0	0	0	0	0	0	0	0	0	0	0	0	0	0	0	0	0	0	0	0	0	0	0	0	0	0	0	0	0	0	0	0	0	0	0	0
Zotu1754	0	0	0	0	0	0	0	0	0	0	0	0	0	0	0	0	0	0	0	0	0	0	0	0	0	0	0	0	0	0	0	0	0	0	0	0	0	0	0	0	0	0	0	0	0	0	0	0	0
Zotu1755	0	0	0	0	0	0	0	0	0	0	0	0	0	0	0	0	0	0	0	0	0	0	0	0	0	0	0	0	0	0	0	0	0	0	0	0	0	0	0	0	0	0	0	0	0	0	0	0	0
Zotu1756	0	0	0	0	0	0	0	0	0	0	0	0	0	0	0	0	0	0	0	0	0	0	0	0	0	0	0	0	0	0	0	0	0	0	0	0	0	0	0	0	0	0	0	0	0	0	0	0	0
Zotu1757	0	0	0	0	0	0	0	0	0	0	0	0	0	0	0	0	0	0	0	0	0	0	0	0	0	0	0	0	0	0	0	0	0	0	0	0	0	0	0	0	0	0	0	0	0	0	0	0	0
Zotu1758	0	0	0	0	0	0	0	0	0	0	0	0	0	0	0	0	0	0	0	0	0	0	0	0	0	0	0	0	0	0	0	0	0	0	0	0	0	0	0	0	0	0	0	0	0	0	0	0	0
Zotu1759	0	0	0	0	0	0	0	0	0	0	0	0	0	0	0	0	0	0	0	0	0	0	0	0	0	0	0	0	0	0	0	0	0	0	0	0	0	0	0	0	0	0	0	0	0	0	0	0	0
Zotu176	1	0	0	0	0	0	0	0	0	0	0	1	0	0	1	1	1	0	0	39	0	0	0	0	0	0	0	0	2	0	0	0	0	2	0	0	0	0	0	0	0	0	0	0	0	0	0	0	0
Zotu1760	0	0	0	0	0	0	0	0	0	0	0	0	0	0	0	0	0	1	0	0	0	0	0	0	0	0	0	0	0	0	0	0	0	0	0	0	0	0	0	0	0	0	0	0	0	0	0	0	0
Zotu1761	0	0	0	0	0	0	0	0	0	0	0	0	0	0	0	0	0	0	0	0	0	0	0	0	0	0	0	0	0	0	0	0	0	0	0	0	0	0	0	0	0	0	0	0	0	0	0	0	0
Zotu1762	0	0	0	0	0	0	0	0	0	0	0	0	0	0	0	0	0	0	0	0	0	0	0	0	0	0	0	0	0	0	0	0	0	0	0	0	0	0	0	0	0	0	0	0	0	0	0	0	0
Zotu1763	0	0	0	0	0	0	0	0	0	0	0	0	0	0	0	0	0	0	0	0	0	0	0	0	0	0	0	0	0	0	0	0	0	0	0	0	0	0	0	0	0	0	0	0	0	0	0	0	0
Zotu1764	0	0	0	0	0	0	0	0	0	0	0	0	0	0	0	0	0	0	0	0	0	0	0	0	0	0	0	0	0	0	0	0	0	0	0	0	0	0	0	0	0	0	0	0	0	0	0	0	0
Zotu1765	0	0	0	0	0	0	0	0	0	0	0	0	0	0	0	0	0	0	0	0	0	0	0	0	0	0	0	0	0	0	0	0	0	0	0	0	0	0	0	0	0	0	0	0	0	0	0	0	0
Zotu1766	0	0	0	0	0	0	0	0	0	0	0	0	0	0	0	0	0	0	0	0	0	0	0	0	0	0	0	0	0	0	0	0	0	0	0	0	0	0	0	0	0	0	0	0	0	0	0	0	0
Zotu1767	0	0	0	0	0	0	0	0	0	0	0	0	0	0	0	0	0	0	0	0	0	0	0	0	0	0	0	0	0	0	0	0	0	0	0	0	0	0	0	0	0	0	0	0	0	0	0	0	0
Zotu1768	0	0	0	0	0	0	0	0	0	0	0	0	0	0	0	0	0	0	0	0	0	0	0	0	0	0	0	0	0	0	0	0	0	0	0	0	0	0	0	0	0	0	0	0	0	0	0	0	0
Zotu1769	0	0	0	0	0	0	0	0	0	0	0	0	0	0	0	0	0	0	0	0	0	0	0	0	0	0	0	0	0	0	0	0	0	0	0	0	0	0	0	0	0	0	0	0	0	0	0	0	0
Zotu177	1	0	1243	1	0	0	0	0	2	0	0	0	0	0	2	0	0	0	0	1046	0	0	0	1	1	2	0	0	2	4	0	1	0	0	0	0	0	0	0	0	1	0	0	0	0	0	0	0	0
Zotu1770	0	0	0	0	0	0	0	0	0	0	0	0	0	0	0	0	0	0	0	0	0	0	0	0	0	0	0	0	0	0	0	0	0	0	0	0	0	0	0	0	0	0	0	0	0	0	0	0	0
Zotu1771	0	0	0	0	0	0	0	0	0	0	0	0	0	0	0	0	0	0	0	0	0	0	0	0	0	0	0	0	0	0	0	0	0	0	0	0	0	0	0	0	0	0	0	0	0	0	0	0	0
Zotu1772	0	0	0	0	0	0	0	0	0	0	0	0	0	0	0	0	0	0	0	0	0	0	0	0	0	0	0	0	0	0	0	0	0	0	0	0	1	0	0	0	0	0	0	0	0	0	0	0	0
Zotu1773	0	0	0	0	0	0	0	0	0	0	0	0	0	0	0	0	0	0	0	0	0	0	0	0	0	0	0	0	0	0	0	0	0	0	0	0	0	0	0	0	0	0	0	0	0	0	0	0	0
Zotu1774	0	0	0	0	0	0	0	0	0	0	0	0	0	0	0	0	0	0	0	0	0	0	0	0	0	0	0	0	0	0	0	0	0	0	0	0	0	0	0	0	0	0	0	0	0	0	0	0	0
Zotu1775	0	0	0	0	0	0	0	0	0	0	0	0	0	0	0	0	0	0	0	0	0	0	0	0	0	0	0	0	0	0	0	0	0	0	0	0	0	0	0	0	0	0	0	0	0	0	0	0	0
Zotu1776	0	0	0	0	0	0	0	0	0	0	0	0	0	0	0	0	0	0	0	0	0	0	0	0	0	0	80	0	0	0	0	0	0	0	0	0	0	0	0	0	0	0	0	0	0	0	0	0	0
Zotu1777	0	0	0	0	0	0	0	0	0	0	0	0	0	0	0	0	0	0	0	0	0	0	0	0	0	0	0	0	0	0	0	0	0	0	0	0	0	0	0	0	0	0	0	0	0	0	0	0	0
Zotu1778	0	0	0	0	0	0	0	0	0	0	0	0	0	0	0	0	0	0	0	0	0	0	0	0	0	0	0	0	0	0	0	0	0	0	0	0	0	0	0	0	0	0	0	0	0	0	0	0	0
Zotu1779	0	0	0	0	0	0	0	0	0	0	0	0	0	0	0	0	0	0	0	0	0	0	0	0	0	0	0	0	0	0	0	0	0	0	0	0	0	0	0	0	0	0	0	0	0	0	0	0	0
Zotu178	0	0	0	0	2	0	0	0	0	0	0	0	0	0	0	0	0	32	0	0	0	0	0	0	0	0	0	0	0	0	0	0	0	0	0	0	0	0	0	0	0	0	0	0	0	0	0	0	0
Zotu1780	0	0	0	0	0	0	0	0	0	0	0	0	0	0	0	0	0	0	0	0	0	0	0	0	0	0	0	0	0	0	0	0	0	0	0	0	0	0	0	0	0	0	0	1	0	0	0	0	0
Zotu1781	0	0	0	0	0	0	0	0	0	10	0	0	0	0	0	0	41	0	0	0	0	0	0	0	0	0	0	0	0	0	0	0	27	0	0	0	0	0	0	0	0	0	0	0	0	0	0	0	0
Zotu1782	0	0	0	0	0	0	0	0	0	0	0	0	0	0	0	0	0	0	0	0	0	0	0	0	0	0	0	0	0	0	0	0	0	0	0	0	0	0	0	0	0	0	0	0	0	0	0	0	0
Zotu1783	0	0	0	0	0	0	0	0	0	0	0	0	0	0	0	0	0	0	0	0	0	0	0	0	0	0	0	0	0	0	0	0	0	0	0	0	0	0	0	0	0	0	0	0	0	0	0	0	0
Zotu1784	0	0	0	0	0	0	0	0	0	0	0	0	0	0	0	0	0	0	0	0	0	0	0	0	0	0	0	0	0	0	0	0	0	0	0	0	0	0	0	0	0	0	0	0	0	0	0	0	0
Zotu1785	0	0	0	0	0	0	0	0	0	0	0	0	0	0	0	0	0	0	0	0	0	0	0	0	0	0	0	0	0	0	0	0	0	0	0	0	0	0	0	0	0	0	0	0	0	0	0	0	0
Zotu1786	0	0	0	0	0	0	0	0	0	0	0	0	0	0	0	0	0	0	0	0	0	0	0	0	0	0	0	0	0	0	0	0	0	0	0	0	90	0	0	0	0	0	0	0	0	0	0	0	0
Zotu1787	0	0	0	0	0	0	0	0	0	0	0	0	0	0	0	0	0	0	0	0	0	0	0	0	0	0	0	0	0	0	0	0	0	0	0	0	0	0	0	0	0	0	0	0	0	0	0	0	0
Zotu1788	0	0	0	0	0	0	0	0	0	0	0	0	0	0	0	0	0	0	0	0	0	0	0	0	0	0	0	0	0	0	0	0	0	0	0	0	0	0	0	0	0	0	0	0	0	0	0	0	0
Zotu1789	0	0	0	0	0	0	0	0	0	0	19	1	0	0	0	0	0	0	0	0	0	0	0	0	0	0	0	0	0	0	0	0	0	0	0	0	0	0	0	0	0	0	0	1	0	4	0	11	0
Zotu179	0	0	0	0	0	0	0	0	0	0	0	0	0	0	0	0	0	1	0	0	0	0	1	0	0	0	0	0	0	0	0	0	0	1	0	0	0	6	0	0	0	0	0	0	0	1	0	0	0
Zotu1790	0	0	0	0	0	0	0	0	0	0	0	0	0	0	0	0	0	0	0	0	0	0	0	0	0	0	0	0	0	0	0	0	0	0	0	0	0	0	0	0	0	0	0	0	0	0	0	0	0
Zotu1791	0	0	0	0	0	0	0	0	0	0	0	0	0	0	0	0	0	0	0	0	0	0	0	0	0	0	0	0	0	0	0	0	0	0	0	0	0	0	0	0	0	0	0	0	0	0	0	0	0
Zotu1792	0	0	0	0	0	0	0	0	0	0	0	0	0	0	0	0	0	0	0	0	0	0	0	0	0	0	0	0	0	0	0	0	0	0	0	0	0	0	0	0	0	0	0	0	0	0	0	0	0
Zotu1793	0	0	0	0	0	0	0	0	0	0	0	0	0	0	0	0	0	0	0	0	0	0	0	0	0	0	0	0	0	0	0	0	0	0	0	0	0	0	0	0	0	0	0	0	0	0	0	0	0
Zotu1794	0	0	0	0	0	0	0	0	0	0	0	0	0	0	0	0	0	0	0	0	0	0	0	0	0	0	0	0	0	0	0	0	0	0	0	0	0	0	0	0	0	0	0	0	0	0	0	0	0
Zotu1795	0	0	0	0	0	0	0	0	0	0	0	0	0	0	0	0	0	0	0	0	0	0	0	0	0	0	0	101	0	0	0	0	0	0	0	0	0	0	0	0	0	0	0	0	0	0	0	0	0
Zotu1796	0	0	0	0	0	0	0	0	0	0	0	0	0	0	0	0	0	0	0	0	0	0	0	0	0	0	0	0	0	0	0	0	0	0	0	0	0	0	0	0	0	0	0	0	0	0	0	0	0
Zotu1797	0	0	0	0	0	0	0	0	0	0	0	0	0	0	0	0	0	0	0	0	0	0	0	0	0	0	0	0	0	0	0	0	0	0	0	0	0	0	0	0	0	0	0	0	0	0	0	0	0
Zotu1798	0	0	0	0	0	0	0	0	0	0	0	0	0	0	0	0	0	0	0	0	0	0	0	0	0	0	0	0	0	0	0	0	0	0	0	0	0	0	0	0	0	0	0	0	0	0	0	0	0
Zotu1799	0	0	0	0	0	0	0	0	0	0	0	0	0	0	0	0	0	0	0	0	0	0	0	0	0	0	0	0	0	0	0	0	0	0	0	0	0	0	0	0	0	0	0	0	0	0	0	0	0
Zotu18	1	7274	1030	3	2	0	0	0	2	0	0	1	0	71	3	0	1	12	0	0	0	1	1	0	1	1	0	3	3	8	2	1	0	2	2	0	1	0	0	56	5	3	1	0	1	5	0	0	0
Zotu180	1	0	1	1	1	0	0	0	0	0	0	0	0	0	1	0	0	0	0	0	0	0	0	0	2	7348	0	0	0	0	0	0	0	0	0	0	0	0	0	0	2	0	0	0	0	0	0	0	0
Zotu1800	0	0	0	0	0	0	0	0	0	0	0	0	0	0	0	0	0	0	0	0	0	0	0	0	0	0	0	0	0	0	0	0	0	0	0	0	0	0	0	0	0	0	0	0	0	0	0	0	0
Zotu1801	0	0	0	0	0	0	0	0	0	0	0	0	0	0	0	0	0	0	0	0	0	0	0	0	0	0	0	0	0	0	0	0	0	0	0	0	0	0	0	0	0	0	0	0	0	0	0	0	0
Zotu1802	0	0	0	0	0	0	0	0	0	0	0	0	0	0	0	0	0	0	0	0	0	0	0	0	0	0	0	0	0	0	0	0	0	0	0	0	0	0	0	0	0	0	0	0	0	0	0	0	0
Zotu1803	0	0	0	0	0	0	0	0	0	0	0	0	0	0	0	0	0	0	0	0	0	0	0	0	0	0	0	0	0	0	0	0	0	0	0	0	0	0	0	0	0	0	0	0	0	0	0	0	0
Zotu1804	0	0	0	0	0	0	0	0	0	0	0	0	0	0	0	0	0	0	0	0	0	0	0	0	0	0	0	0	0	0	0	0	0	0	0	0	0	0	0	0	0	0	0	0	0	0	0	0	0
Zotu1805	0	0	0	0	0	0	0	0	0	0	0	0	0	0	0	0	0	0	0	0	0	0	0	0	0	0	0	0	0	0	0	0	0	0	0	0	0	0	0	0	0	0	0	0	0	0	0	0	0
Zotu1806	0	0	0	0	0	0	0	0	0	0	0	0	0	0	0	0	0	0	0	0	0	0	0	0	0	0	0	0	0	0	0	0	0	0	0	0	0	0	0	0	0	0	0	0	0	0	0	0	0
Zotu1807	0	0	0	0	0	0	0	0	0	0	0	0	0	0	0	0	0	0	0	0	0	0	0	0	0	0	100	0	0	0	0	0	0	0	0	0	0	0	0	0	0	0	0	0	0	0	0	0	0
Zotu1808	0	0	0	0	0	0	0	0	0	0	0	0	0	0	0	0	34	0	0	0	0	0	0	0	0	0	0	0	0	0	0	0	0	0	0	0	0	0	0	0	0	0	0	0	0	0	0	0	0
Zotu1809	0	0	0	0	0	0	0	0	0	0	0	0	0	0	0	0	0	0	0	0	0	0	0	0	0	0	0	0	0	0	0	0	0	0	0	0	0	0	0	0	0	0	0	0	0	0	0	0	0
Zotu181	0	0	1	0	0	0	0	0	0	0	0	0	0	0	0	0	2	0	0	0	0	0	0	1	0	0	0	0	0	0	0	0	0	0	0	1	0	0	0	0	0	0	0	0	0	0	0	0	0
Zotu1810	0	0	0	0	0	0	0	0	0	0	0	0	0	0	0	0	0	0	0	0	0	0	0	0	0	0	0	0	0	0	0	0	0	0	0	0	0	0	0	0	0	0	0	0	0	0	0	0	0
Zotu1811	0	0	0	0	0	0	0	0	0	0	0	0	0	0	0	0	0	0	0	0	0	0	0	0	0	0	0	0	0	0	0	0	0	0	0	0	0	0	0	0	0	0	0	0	0	0	0	0	0
Zotu1812	0	0	0	0	0	0	0	0	0	0	0	0	0	0	0	0	0	0	0	0	0	0	0	0	0	0	0	0	0	0	0	0	0	0	0	0	0	0	0	0	0	0	0	0	0	0	0	0	0
Zotu1813	0	0	0	0	0	0	0	0	0	0	0	0	0	0	0	0	0	0	0	0	0	0	0	0	0	0	0	0	0	0	0	0	0	0	0	0	0	0	0	0	0	0	0	0	0	0	0	0	0
Zotu1814	0	0	0	0	0	0	0	0	0	0	0	0	0	0	100	0	0	0	0	0	0	0	0	0	0	0	0	0	0	0	0	0	0	0	0	0	0	0	0	0	1	0	0	0	0	0	0	0	0
Zotu1815	0	0	0	0	0	0	0	0	0	0	0	0	0	0	0	0	0	0	0	0	0	0	0	0	0	0	0	0	9	0	0	0	0	0	0	0	0	0	0	0	0	0	0	0	0	0	0	0	0
Zotu1816	0	0	0	0	0	0	0	0	0	0	0	0	0	0	0	0	0	0	0	0	0	0	0	0	0	0	0	0	0	0	0	0	0	0	0	0	0	0	0	0	0	0	0	0	0	0	0	0	0
Zotu1817	0	0	0	0	0	0	0	0	0	0	0	0	0	0	0	0	0	0	0	0	0	0	0	0	0	0	0	0	0	0	0	0	0	0	0	0	0	0	0	0	0	0	0	0	0	0	0	0	0
Zotu1818	0	0	0	0	0	0	0	0	0	0	0	0	0	0	0	0	0	0	0	0	0	0	0	0	0	0	0	0	0	0	0	0	0	0	0	0	0	0	0	0	0	0	0	0	0	0	0	0	0
Zotu1819	0	0	0	0	0	0	0	0	0	0	0	0	0	0	0	0	0	0	0	0	0	0	0	0	0	0	0	0	0	0	0	0	0	0	0	0	0	0	0	0	0	0	0	0	0	0	0	0	0
Zotu182	137	0	0	0	4	0	0	0	0	0	0	0	0	0	0	0	0	0	1	0	0	0	0	0	0	0	0	0	0	0	0	0	0	0	1	0	0	1	0	0	0	0	0	0	0	1	0	1	0
Zotu1820	0	0	0	0	0	0	0	0	0	0	0	0	0	0	0	0	0	0	0	0	0	0	0	0	0	0	0	0	0	0	0	0	0	0	0	0	0	0	0	0	0	0	0	0	0	0	0	0	0
Zotu1821	0	0	0	0	0	0	0	0	0	0	0	0	0	0	0	0	0	0	0	0	0	0	0	0	0	0	0	0	0	0	0	0	0	0	0	0	0	0	0	0	0	0	0	0	0	0	0	0	0
Zotu1822	0	0	0	0	0	0	0	0	0	0	0	0	0	0	0	0	0	0	0	0	0	0	0	0	0	0	0	0	0	0	0	0	0	0	0	0	0	0	0	0	0	0	0	0	0	0	0	0	0
Zotu1823	0	0	0	0	0	0	0	0	0	0	0	0	0	0	0	0	0	0	0	0	0	0	0	0	0	0	0	0	0	0	0	0	0	0	0	0	0	0	0	0	0	0	0	0	0	0	0	0	0
Zotu1824	0	0	0	0	0	0	0	0	0	0	0	0	0	0	0	0	0	0	0	0	0	0	0	0	0	0	0	0	0	0	0	0	0	0	0	0	0	0	0	0	0	0	0	0	0	0	0	0	0
Zotu1825	0	0	0	0	0	0	0	0	0	0	0	0	0	0	0	0	0	0	0	0	0	0	0	0	0	0	0	0	0	0	0	0	0	0	0	0	0	0	0	0	0	0	0	0	0	0	0	0	0
Zotu1826	0	0	0	0	0	0	0	0	0	0	0	0	0	0	0	0	0	0	0	0	0	0	0	0	0	0	0	0	0	0	0	0	0	0	0	0	0	0	0	0	0	0	0	0	0	0	0	0	0
Zotu1827	0	0	0	0	0	0	0	0	0	0	0	0	0	0	0	0	0	0	0	0	0	0	0	0	0	0	0	0	0	0	0	0	0	0	0	0	0	0	0	0	0	0	0	0	0	0	0	0	0
Zotu1828	0	0	0	0	0	0	0	0	0	0	0	0	0	0	0	0	0	0	0	0	0	0	0	0	0	0	0	0	0	0	0	0	0	0	0	0	0	0	0	0	0	0	0	0	0	0	0	0	0
Zotu1829	0	0	0	0	0	0	0	0	0	0	0	0	0	0	0	0	0	0	0	0	0	0	0	0	0	0	0	0	0	0	0	0	0	0	0	0	0	0	0	0	0	0	0	0	0	0	0	0	0
Zotu183	0	0	0	0	0	0	0	0	0	0	0	0	0	0	0	0	0	0	0	0	0	0	0	0	0	0	0	14	188	0	0	0	0	1	0	0	0	0	0	0	0	0	0	0	0	0	0	0	0
Zotu1830	0	0	0	0	6	0	0	0	0	0	0	0	0	0	0	0	0	3	0	0	0	27	0	0	0	0	0	0	0	0	0	0	0	0	0	0	0	0	0	0	0	0	0	0	0	0	0	0	0
Zotu1831	0	0	0	1	0	0	0	0	0	0	2	0	0	0	0	0	14	0	0	0	0	0	0	0	0	0	0	0	0	0	0	0	0	0	0	0	0	1	0	0	0	0	0	0	0	0	0	0	0
Zotu1832	0	0	0	0	0	0	0	0	0	0	0	0	0	0	0	0	0	0	0	0	0	0	0	0	0	0	0	0	0	0	0	0	0	0	0	0	0	0	0	0	0	0	1	0	0	0	0	0	0
Zotu1833	0	0	0	0	0	0	0	0	0	0	0	0	0	0	0	0	0	0	0	0	0	0	0	0	0	0	0	0	0	0	0	0	0	0	0	0	0	0	0	0	0	0	0	0	0	0	0	0	0
Zotu1834	0	0	0	0	0	0	0	0	0	0	0	0	0	0	0	0	0	0	1	0	0	0	0	0	0	0	0	0	0	0	0	0	0	0	0	0	0	0	0	0	0	0	0	0	0	0	0	0	0
Zotu1835	0	0	0	0	0	0	0	0	0	0	0	0	0	0	0	0	0	0	0	0	0	0	0	0	0	0	0	0	0	0	0	0	0	0	0	0	0	0	0	0	0	0	0	0	0	0	0	0	0
Zotu1836	0	0	0	0	0	0	0	0	0	0	0	0	0	0	0	0	0	0	0	0	0	0	0	0	0	0	0	0	0	0	0	0	0	0	0	0	0	0	0	0	0	0	0	0	0	0	0	0	0
Zotu1837	0	0	0	0	0	0	0	0	0	0	0	0	0	0	0	0	0	0	0	0	0	0	0	0	0	0	0	0	0	0	0	0	0	0	0	0	0	0	0	0	0	0	0	0	0	0	0	0	0
Zotu1838	0	0	0	0	0	0	0	0	0	0	0	0	0	0	0	0	0	0	0	0	0	0	0	0	0	0	0	0	0	0	0	0	0	0	0	0	0	0	0	0	0	0	0	9	0	0	0	0	0
Zotu1839	0	0	0	0	0	0	0	0	0	0	0	0	0	0	0	0	0	0	0	0	0	0	0	0	0	0	0	0	0	0	0	0	49	0	0	0	0	0	0	0	0	0	0	0	0	0	0	0	0
Zotu184	0	0	0	0	0	0	0	0	0	0	0	0	0	0	0	0	0	0	0	0	0	0	3	0	0	0	0	0	0	0	0	0	0	0	0	0	0	8	0	0	0	0	0	0	0	0	0	0	0
Zotu1840	0	0	0	0	0	0	0	0	0	0	0	0	0	0	0	0	0	0	0	0	0	0	0	0	0	0	0	0	0	0	0	0	0	0	0	0	0	0	0	0	0	0	0	0	0	0	0	0	0
Zotu1841	0	0	0	0	0	0	0	0	0	0	0	0	0	0	0	0	0	0	0	0	0	0	0	0	0	0	0	0	0	0	0	0	0	0	0	0	0	0	0	0	0	0	0	0	0	0	0	0	0
Zotu1842	0	0	0	0	0	0	0	0	0	0	0	0	0	0	0	0	0	0	0	0	0	0	0	0	0	0	0	0	0	0	0	0	0	0	0	0	0	0	0	0	0	0	0	0	0	0	0	0	0
Zotu1843	0	0	0	0	0	0	0	0	0	0	0	0	0	0	0	0	0	0	0	0	0	0	0	0	0	0	0	0	0	0	0	0	0	0	0	0	0	0	0	0	0	0	0	0	0	0	0	0	0
Zotu1844	0	0	0	0	0	0	0	0	0	0	0	0	0	0	0	0	0	0	0	0	0	0	0	0	0	0	0	0	0	0	0	0	0	0	0	0	0	0	0	0	0	0	0	0	0	0	0	0	0
Zotu1845	0	0	0	0	0	0	0	0	0	0	0	0	0	0	0	0	0	0	0	0	0	0	0	0	0	0	0	0	0	0	0	0	0	0	0	0	0	0	0	0	0	0	0	0	0	0	0	0	0
Zotu1846	0	0	0	0	0	0	0	0	0	0	0	0	0	0	0	0	0	0	0	0	0	0	0	0	0	0	0	0	0	0	0	0	0	0	0	0	0	0	0	0	0	0	0	0	0	0	0	0	0
Zotu1847	0	0	0	0	0	0	0	0	0	0	0	0	0	0	0	0	0	0	0	0	0	0	0	0	0	0	0	0	0	0	0	0	0	0	0	0	0	0	0	0	0	0	0	0	0	0	0	0	0
Zotu1848	0	0	0	0	0	0	0	0	0	0	0	0	0	0	0	0	0	0	0	0	0	0	0	0	0	0	0	0	0	0	0	0	0	0	0	0	0	0	0	0	0	0	0	0	0	0	0	0	0
Zotu1849	0	0	0	0	0	0	0	0	0	0	0	0	0	0	0	0	0	0	0	0	0	0	0	0	0	0	0	0	0	0	0	0	0	0	0	0	0	0	0	0	0	0	0	0	0	0	0	0	0
Zotu185	0	0	1	0	0	0	0	0	0	0	0	0	0	0	0	0	31	0	0	0	0	0	0	0	0	0	0	0	0	0	0	0	0	0	0	0	0	0	0	0	0	0	0	0	0	0	0	0	0
Zotu1850	0	0	0	0	0	0	0	0	0	0	0	0	0	0	0	0	0	0	0	0	0	0	0	0	0	0	0	0	0	0	0	0	0	0	0	0	0	0	0	0	0	0	0	0	0	0	0	0	0
Zotu1851	0	0	0	0	0	0	0	0	0	0	0	0	0	0	0	0	0	0	0	0	0	0	0	0	0	0	0	0	0	0	0	0	0	0	0	0	0	0	0	0	0	0	0	0	0	0	0	0	0
Zotu1852	0	0	0	0	0	0	0	0	0	0	0	0	0	0	0	0	0	0	0	0	0	0	0	0	0	0	0	0	0	0	0	0	0	0	0	0	0	0	0	0	0	0	0	0	0	0	0	0	0
Zotu1853	0	0	0	0	0	0	0	0	0	0	0	0	0	0	0	0	0	0	0	0	0	0	0	0	0	0	0	0	0	0	0	0	0	0	0	0	0	0	0	0	0	0	0	0	0	0	0	0	0
Zotu1854	0	0	0	0	0	0	0	0	0	0	0	0	0	0	0	0	0	0	0	0	0	0	0	0	0	0	0	0	0	0	0	0	0	0	0	0	0	0	0	0	0	0	0	0	0	0	0	0	0
Zotu1855	0	0	0	0	0	0	0	0	0	0	0	0	0	0	0	0	0	0	0	0	0	0	0	0	0	0	0	0	0	0	0	0	0	0	0	0	0	0	0	0	0	0	0	0	0	0	0	0	0
Zotu1856	0	0	0	0	0	0	0	0	0	0	0	0	0	0	0	0	0	0	0	0	0	0	0	0	0	0	0	0	0	0	0	0	0	0	0	0	0	0	0	0	0	0	0	0	0	0	0	0	0
Zotu1857	0	0	0	0	0	0	0	0	0	0	0	0	0	0	0	0	0	0	0	0	0	0	0	0	1	0	0	0	0	0	0	0	0	0	0	0	0	0	0	0	0	0	0	0	0	0	0	0	0
Zotu1858	0	0	0	0	0	0	0	0	0	0	0	0	0	0	0	0	0	0	0	0	0	0	0	0	0	0	0	0	0	0	0	0	0	0	0	0	0	0	0	0	0	0	0	0	0	0	0	0	1
Zotu1859	0	0	0	0	0	0	0	0	0	0	0	0	0	0	0	0	0	0	0	0	0	0	0	0	0	0	0	0	0	0	0	0	0	0	0	0	0	0	0	0	0	0	0	0	0	0	0	0	0
Zotu186	0	0	0	0	0	0	0	0	0	0	0	0	0	0	0	0	0	0	0	0	0	0	0	0	0	0	0	0	0	0	0	0	0	0	0	0	0	0	0	0	0	0	0	0	0	0	0	0	0
Zotu1860	0	0	0	0	0	0	0	0	0	0	0	0	0	0	0	0	0	0	0	0	0	0	0	0	0	0	0	0	0	0	0	0	0	0	0	0	0	0	0	0	0	0	0	0	0	0	0	0	0
Zotu1861	0	0	0	0	0	0	0	0	0	0	0	0	0	0	0	0	0	0	0	0	0	0	0	0	0	0	0	0	0	0	0	0	0	0	0	0	0	0	0	0	0	0	0	0	0	0	0	0	0
Zotu1862	0	0	0	0	0	0	0	0	0	0	0	0	0	0	0	0	0	0	0	0	0	0	0	0	0	0	0	0	0	0	0	0	0	0	0	0	0	0	0	0	0	0	0	0	0	0	0	0	0
Zotu1863	0	0	0	0	0	0	0	0	0	0	0	0	0	0	0	0	0	0	0	0	0	0	0	0	0	0	0	0	0	0	0	0	0	0	0	0	0	0	0	0	0	0	0	0	0	0	0	0	0
Zotu1864	0	9	0	0	0	32	0	0	0	0	0	0	0	0	0	0	0	0	0	0	0	0	0	0	0	0	0	0	0	0	0	0	0	0	0	0	2	5	0	0	0	3	0	0	0	0	4	5	23
Zotu1865	0	0	0	0	0	0	0	0	0	0	0	0	0	0	0	0	0	0	0	0	0	0	0	0	0	0	0	0	0	0	0	0	0	0	0	0	0	0	0	0	0	0	0	0	0	0	0	0	0
Zotu1866	0	0	0	0	0	0	0	0	0	0	0	0	0	0	0	0	0	0	0	0	0	0	0	0	0	0	0	0	0	0	0	0	0	0	0	0	0	0	0	0	0	0	0	0	0	0	0	0	0
Zotu1867	0	0	0	0	0	0	0	0	0	0	0	0	0	0	0	0	19	0	0	0	0	0	0	0	0	0	0	0	0	0	0	0	18	0	0	0	0	0	0	0	0	0	0	0	0	0	0	0	0
Zotu1868	0	0	0	0	0	0	0	0	0	0	0	0	0	0	0	0	0	0	0	0	0	0	0	0	0	0	0	0	0	0	0	0	0	0	0	0	0	0	0	0	0	0	0	0	0	0	0	0	0
Zotu187	0	0	0	0	0	0	0	0	0	0	0	0	0	1	0	0	0	0	0	0	0	0	0	0	2	0	0	0	0	0	0	0	0	0	0	0	0	0	0	1	0	0	0	0	0	0	0	0	0
Zotu1870	0	0	0	0	0	0	0	0	0	0	0	0	0	0	0	0	0	0	0	0	0	0	0	0	0	0	0	0	0	0	0	0	60	0	0	0	0	0	0	0	0	0	0	0	0	0	0	0	0
Zotu1871	0	0	0	0	0	0	0	0	0	0	0	0	0	0	0	0	0	0	0	0	0	0	0	0	0	0	0	0	0	0	0	0	0	0	0	0	0	0	0	0	0	0	0	0	0	0	0	0	0
Zotu1872	0	0	0	0	0	0	0	0	0	0	0	0	0	0	0	0	0	0	0	0	0	0	0	0	0	0	0	0	0	0	0	0	0	0	0	0	0	0	0	0	0	0	0	0	0	0	0	0	0
Zotu1873	0	0	0	0	0	0	0	0	0	0	0	0	0	0	0	0	0	0	0	0	0	0	0	0	0	0	0	84	0	0	0	0	0	0	0	0	0	0	0	0	0	0	0	0	0	0	0	0	0
Zotu1874	0	0	0	0	0	0	0	0	0	0	0	0	0	0	0	0	0	0	0	0	0	0	0	0	0	0	0	0	0	0	0	0	0	0	0	0	0	0	0	0	0	0	0	0	0	0	0	0	0
Zotu1875	0	0	0	0	0	0	0	0	0	0	0	0	0	0	0	0	0	0	0	0	0	0	0	0	0	0	0	0	0	0	0	0	0	0	0	0	0	0	0	0	0	0	0	0	0	0	0	0	0
Zotu1876	0	0	0	0	0	0	0	0	0	0	0	0	0	0	0	0	0	0	0	0	0	0	0	0	0	0	0	0	0	0	0	0	0	0	0	0	0	0	0	0	0	0	0	0	0	0	0	0	0
Zotu1877	0	0	0	0	0	0	0	0	0	0	0	0	0	0	0	0	0	0	0	0	0	0	0	0	0	0	0	0	0	0	0	0	0	0	0	0	0	0	0	0	0	0	0	0	0	0	0	0	0
Zotu1878	0	0	0	0	0	0	0	0	0	0	0	0	0	0	0	0	0	0	0	0	0	0	0	0	0	0	0	0	0	0	0	0	0	0	0	0	0	0	0	0	0	0	0	0	0	0	0	0	0
Zotu1879	0	0	0	0	0	0	0	0	0	0	0	0	0	0	0	0	0	0	0	0	0	0	0	0	0	0	0	0	0	0	0	0	0	0	0	0	0	0	0	0	0	0	0	0	0	0	0	0	0
Zotu188	0	0	0	0	0	0	0	0	3	0	0	0	0	0	0	0	0	0	0	0	0	0	138	0	0	0	0	0	0	0	1	1	0	0	0	0	0	0	0	0	0	0	0	0	0	0	0	0	0
Zotu1880	0	0	0	0	0	0	0	0	0	0	0	0	0	0	0	0	0	0	0	0	0	0	0	0	0	0	0	0	0	0	0	0	0	0	0	0	0	0	0	0	0	0	0	0	0	0	0	0	0
Zotu1881	0	0	0	0	0	0	0	0	0	0	0	0	0	0	0	0	0	0	0	0	0	0	0	0	0	0	0	0	0	0	0	0	0	0	0	0	0	0	0	0	0	0	0	0	0	0	0	0	0
Zotu1882	0	0	0	0	0	0	0	0	0	0	0	0	0	0	0	0	0	0	0	0	0	0	0	0	0	0	0	0	0	0	0	0	0	0	0	0	0	0	0	0	0	0	0	0	0	0	0	0	0
Zotu1883	0	0	0	0	0	0	0	0	0	0	0	0	0	0	0	0	0	0	0	0	0	0	0	0	0	0	0	0	0	0	0	0	0	0	0	0	0	0	0	0	0	0	0	0	0	0	0	0	0
Zotu1884	0	0	0	0	0	0	0	0	0	0	0	0	0	0	0	0	0	0	0	0	0	0	0	0	0	0	0	0	0	0	0	0	0	0	0	0	0	0	0	0	0	0	0	0	0	0	0	0	0
Zotu1885	0	0	0	0	0	0	0	0	0	0	0	0	0	0	0	0	0	0	0	0	0	0	0	0	0	0	0	0	0	0	0	0	0	0	0	0	0	0	0	0	0	0	0	0	0	0	0	0	0
Zotu1886	0	0	0	0	0	0	0	0	0	0	0	0	0	0	0	0	0	0	0	0	0	0	0	0	0	0	0	0	0	0	0	0	0	0	0	0	0	0	0	0	0	0	0	0	0	0	0	0	0
Zotu1887	0	0	0	0	0	0	0	0	0	0	0	0	0	0	0	0	0	0	0	0	0	0	0	0	0	0	0	0	0	0	0	0	0	0	0	0	0	0	0	0	0	0	0	0	0	0	0	0	0
Zotu1888	0	0	0	0	0	0	0	0	0	0	0	0	0	0	0	0	0	0	0	0	0	0	0	0	0	0	0	0	0	0	0	0	0	0	0	0	0	0	0	0	0	0	0	0	0	0	0	0	0
Zotu1889	0	0	0	0	0	0	0	0	0	0	0	0	0	0	0	0	0	0	0	0	0	0	0	0	0	0	0	0	0	0	0	0	0	0	0	0	0	0	0	0	0	0	0	0	0	0	0	0	0
Zotu189	0	0	0	0	0	0	1	0	0	0	0	0	0	0	0	0	0	0	0	0	0	0	0	0	0	0	0	0	0	0	0	0	0	0	0	0	0	0	0	0	0	0	0	0	0	0	0	0	0
Zotu1890	0	0	0	0	0	0	0	0	0	0	0	0	0	0	0	0	0	0	0	0	0	0	0	0	0	0	0	0	0	0	0	0	0	0	0	0	0	0	0	0	0	0	0	0	0	0	0	0	0
Zotu1891	0	0	0	0	1	0	0	0	0	0	0	0	0	0	0	0	0	1	0	0	0	0	0	0	0	0	0	0	0	0	0	0	2	0	0	0	0	0	0	3	0	6	0	0	0	0	0	0	0
Zotu1892	0	0	0	0	0	0	0	0	0	0	0	0	0	0	0	0	0	0	0	0	0	0	0	0	0	0	0	0	0	0	0	0	0	0	0	0	0	0	0	0	0	0	0	0	0	0	0	0	0
Zotu1893	0	0	0	0	0	0	0	0	0	0	0	0	0	0	0	0	0	0	0	0	0	0	0	0	0	0	0	0	0	0	0	0	0	0	0	0	0	0	0	0	0	0	0	0	0	0	0	0	0
Zotu1894	0	0	0	0	0	0	0	0	0	0	0	0	0	0	0	0	0	0	0	0	0	0	0	0	0	0	0	0	0	0	0	0	0	0	0	0	0	0	0	0	0	0	0	0	0	0	0	0	0
Zotu1895	0	0	0	0	0	0	0	0	0	0	0	0	0	0	0	0	0	0	0	0	0	0	0	0	0	0	0	0	0	0	0	0	0	0	0	0	0	0	0	0	0	0	0	0	0	0	0	0	0
Zotu1896	0	0	0	0	0	0	0	0	0	0	0	0	0	0	0	0	0	0	0	0	0	0	0	0	0	0	0	0	0	0	0	0	0	0	0	0	0	0	0	0	0	0	0	0	0	0	0	0	0
Zotu1897	0	0	0	0	0	0	0	0	0	0	0	0	0	0	0	0	0	0	0	0	0	0	0	0	0	0	0	0	0	0	0	0	0	0	0	0	0	0	0	0	0	0	0	0	0	0	0	0	0
Zotu1898	0	0	0	0	0	0	0	0	0	0	0	0	0	0	0	0	0	0	0	0	0	0	0	0	0	0	0	0	0	0	0	0	0	0	0	0	0	0	0	0	0	0	0	0	0	0	0	0	0
Zotu1899	0	0	0	0	0	0	0	0	0	0	0	0	0	0	0	0	0	0	0	0	0	0	0	0	0	0	0	0	0	0	0	0	0	0	0	0	0	0	0	0	0	0	0	0	0	0	0	0	0
Zotu19	6	1	887	6774	9	8	7	0	0	0	1	1	1	4	7	6	3	81	2	8	1	0	0	1	4	6	0	5	114	3	1	0	1	7	0	1	5	1	0	1	5	4	1	0	0	11	0	1	2
Zotu190	0	0	0	0	0	0	1972	0	0	0	0	0	0	1	1	0	0	0	0	1	0	0	0	0	0	0	0	102	50	0	0	0	0	0	0	0	0	0	0	0	1	0	0	0	0	0	0	0	0
Zotu1900	0	0	0	0	0	0	0	0	0	0	0	0	0	1	0	0	0	0	0	0	0	0	0	0	0	0	0	0	12	0	0	0	1	0	0	0	0	0	0	0	0	0	0	0	0	0	0	0	0
Zotu1901	0	0	0	0	0	0	0	0	0	0	0	0	0	0	0	0	0	0	0	0	0	0	0	0	0	0	0	0	0	0	0	0	0	0	0	0	0	0	0	0	0	0	0	0	0	0	0	0	0
Zotu1902	0	0	0	0	0	0	0	0	0	0	0	0	0	0	0	0	0	0	0	0	0	0	0	0	0	0	0	0	0	0	0	0	0	0	0	0	0	0	0	0	0	0	0	0	0	0	0	0	0
Zotu1903	0	0	0	0	0	0	0	0	0	0	0	0	0	0	0	0	0	0	0	0	0	0	0	0	0	0	0	0	0	0	0	0	0	0	0	0	0	0	0	0	0	0	0	0	0	0	0	0	0
Zotu1904	0	0	69	0	0	0	0	0	0	0	0	0	0	0	0	0	0	1	0	0	0	0	0	0	0	0	0	0	0	0	0	0	0	0	0	0	0	0	0	0	0	0	0	0	0	0	0	0	0
Zotu1905	0	0	0	0	0	0	0	0	0	0	0	0	0	0	0	0	0	0	0	0	0	0	0	0	0	0	0	0	0	0	0	0	0	0	0	0	0	0	0	0	0	0	0	0	0	0	0	0	0
Zotu1906	0	0	0	0	0	0	0	0	0	0	0	0	0	0	0	0	0	0	0	0	0	0	0	0	0	0	0	0	0	0	0	0	0	0	0	0	0	0	0	0	0	0	0	0	0	0	0	0	0
Zotu1907	0	0	0	0	0	0	0	0	0	0	0	0	0	0	0	0	0	0	0	0	0	0	0	0	0	0	0	0	0	0	0	0	0	0	0	0	0	0	0	0	0	0	0	0	0	0	0	0	0
Zotu1908	0	0	0	0	0	0	0	0	0	1	0	0	0	0	0	0	0	0	0	0	0	0	0	0	0	0	0	0	0	0	0	0	0	0	0	0	0	0	0	0	0	0	0	0	0	0	0	0	0
Zotu1909	0	0	0	0	0	0	0	0	0	0	0	0	0	0	0	0	0	0	0	0	0	0	0	0	0	0	0	0	0	0	0	0	0	0	0	0	0	0	0	0	0	0	0	0	0	0	0	0	0
Zotu191	0	0	1	0	1	0	0	0	0	0	0	0	0	0	0	0	0	0	0	0	0	0	0	0	0	0	0	0	0	0	0	0	0	0	0	0	0	0	0	0	0	0	0	0	0	0	0	0	0
Zotu1910	0	0	0	0	0	0	0	0	0	0	0	0	0	0	0	0	0	0	0	0	0	0	0	0	0	0	0	0	1	0	0	0	0	0	0	0	0	0	0	0	0	0	0	0	0	0	0	0	0
Zotu1911	0	0	0	0	0	0	0	0	0	0	0	0	0	0	0	0	0	0	0	0	0	0	0	0	0	0	0	0	0	0	0	0	0	0	0	0	0	0	0	0	0	0	0	0	0	0	0	0	0
Zotu1912	0	0	0	0	2	0	0	0	0	0	0	0	0	0	0	0	0	0	0	0	0	0	0	0	0	0	0	0	0	0	0	0	0	0	0	0	0	0	0	0	0	0	0	0	0	0	0	0	0
Zotu1913	0	0	0	0	0	0	0	0	0	0	0	0	0	0	0	0	0	0	0	0	0	0	0	0	0	0	0	0	0	0	0	0	0	0	0	0	0	0	0	0	0	0	0	0	0	0	0	0	0
Zotu1914	0	0	0	0	0	0	0	0	0	0	0	0	0	0	0	0	0	0	0	0	0	0	0	0	0	0	0	0	0	0	0	0	22	0	0	0	0	1	0	0	0	0	0	0	0	0	0	0	0
Zotu1915	0	0	0	0	0	0	0	0	0	0	0	0	0	0	0	0	0	0	0	0	0	0	0	0	0	0	0	0	0	0	0	0	0	0	0	0	0	0	0	0	0	0	0	0	0	0	0	0	0
Zotu1916	0	0	0	0	0	0	0	0	0	0	0	0	0	0	0	0	0	0	0	0	0	0	0	0	0	0	0	0	0	0	0	0	0	0	0	0	0	0	0	0	0	0	0	0	0	0	0	0	0
Zotu1917	0	0	0	0	0	0	0	0	0	0	0	0	0	0	0	0	0	0	0	0	0	0	0	0	0	0	0	0	0	0	0	0	0	0	0	0	0	0	0	0	0	0	0	0	0	0	0	0	0
Zotu1918	0	0	0	0	0	0	0	0	0	0	0	0	0	0	0	0	0	0	0	0	0	0	0	0	0	0	0	0	0	0	0	0	6	0	0	0	0	0	0	0	0	0	0	5	0	0	0	0	0
Zotu1919	0	0	0	0	0	0	0	0	0	0	0	0	0	0	0	0	0	0	0	0	0	0	0	0	0	0	0	0	0	0	0	0	0	0	0	0	0	0	0	0	0	0	0	0	0	0	0	0	0
Zotu192	0	0	0	0	0	0	0	1	0	0	0	0	0	0	0	0	0	0	8	1	0	0	0	0	0	2	0	0	97	0	0	0	0	0	0	0	0	0	0	0	0	0	0	0	0	0	0	0	0
Zotu1920	0	0	0	0	0	0	0	0	0	0	0	0	0	0	0	0	0	0	0	0	0	0	0	0	0	0	0	0	0	0	0	0	0	0	0	0	0	0	0	0	0	0	0	0	0	0	0	0	0
Zotu1921	0	0	0	0	0	0	0	0	0	0	0	0	0	0	0	0	0	0	0	0	0	0	0	0	0	0	0	0	0	0	0	0	0	0	0	0	0	0	0	0	0	0	0	0	0	0	0	0	0
Zotu1922	0	0	0	0	0	0	0	0	0	0	0	0	0	0	0	0	0	0	0	0	0	0	1	0	0	0	45	1	0	0	0	0	0	0	0	0	0	0	0	0	0	0	0	0	0	0	0	0	0
Zotu1923	0	0	0	0	0	0	0	0	0	0	0	0	0	0	0	0	0	0	0	0	0	0	0	0	0	0	0	0	0	0	0	0	0	0	0	0	0	0	0	0	0	0	0	0	0	0	0	0	0
Zotu1924	0	0	0	0	0	0	0	0	0	0	0	0	0	0	0	0	0	0	0	0	0	0	0	0	0	0	0	0	0	0	0	0	0	0	0	0	0	0	0	0	0	0	0	0	0	0	0	0	0
Zotu1925	0	0	0	0	0	0	0	0	0	0	0	0	0	0	0	0	0	0	0	0	0	0	0	0	0	0	0	0	0	0	0	0	0	0	0	0	0	0	0	0	0	0	0	0	0	0	0	0	0
Zotu1927	0	0	0	0	0	0	0	0	0	0	0	0	0	0	0	0	0	0	0	0	0	0	0	0	0	0	0	0	0	0	0	0	0	0	0	0	0	0	0	0	0	0	0	0	0	0	0	0	0
Zotu1928	0	0	0	0	0	0	0	0	0	0	0	0	0	0	0	0	0	0	0	0	0	0	0	0	0	0	0	0	0	0	0	0	0	0	0	0	0	0	0	0	0	0	0	0	0	0	0	0	0
Zotu1929	0	0	0	0	0	0	0	0	0	0	0	0	0	0	0	0	0	0	0	0	0	0	0	0	0	0	0	0	0	0	0	0	0	0	0	0	0	0	0	0	0	0	0	0	0	0	0	0	0
Zotu193	0	0	0	0	0	0	0	0	0	0	0	0	0	0	0	0	2	0	0	0	1	0	1	0	0	0	0	0	0	0	0	0	0	0	0	0	0	0	0	0	0	0	0	0	0	0	0	0	0
Zotu1930	0	0	0	0	0	0	0	0	0	0	0	0	0	0	0	0	0	0	0	0	0	0	0	0	0	0	0	0	0	0	0	0	0	0	0	0	0	0	0	0	0	0	0	0	0	0	0	0	0
Zotu1931	0	0	0	0	0	0	0	0	0	0	0	0	0	0	0	0	0	0	0	0	0	0	0	0	0	0	0	0	0	0	0	0	0	0	0	0	0	0	0	0	0	0	0	0	0	0	0	0	0
Zotu1932	0	0	0	0	0	0	0	0	0	0	0	0	0	0	0	0	0	0	0	0	0	0	0	0	0	0	0	0	0	0	0	0	0	0	0	0	0	0	0	0	0	0	0	0	0	0	0	0	0
Zotu1933	0	0	0	0	0	0	0	0	0	0	0	0	0	0	0	0	0	0	0	0	0	0	0	0	0	0	0	0	0	0	0	0	0	0	0	0	0	0	0	0	0	0	0	0	0	0	0	0	0
Zotu1934	0	0	0	0	0	0	0	0	0	0	0	0	0	0	0	0	0	0	0	0	0	0	0	0	0	0	0	0	0	0	0	0	0	0	0	0	0	0	0	0	0	0	0	0	0	0	0	0	0
Zotu1935	0	0	0	0	0	0	0	0	0	3	0	3	0	0	0	0	0	0	0	0	0	0	1	0	0	0	2	7	0	0	0	2	0	0	0	0	0	0	0	0	0	0	0	0	0	0	0	0	0
Zotu1936	0	0	0	0	0	0	0	0	0	0	0	0	0	0	0	0	0	18	0	0	0	0	0	0	0	0	0	0	0	0	0	0	0	0	0	0	0	0	0	0	0	0	0	0	0	0	0	0	0
Zotu1937	0	0	0	0	0	0	0	0	0	0	0	0	0	0	0	0	0	0	0	0	0	0	0	0	0	0	0	0	0	0	0	0	0	0	0	0	0	0	0	0	0	0	0	0	0	0	0	0	0
Zotu1938	0	0	0	0	0	0	0	0	0	0	0	0	0	0	0	0	0	0	0	0	0	0	0	0	0	0	0	0	0	0	0	0	0	0	0	0	0	0	0	0	0	0	0	0	0	0	0	0	0
Zotu1939	8	0	0	0	0	0	0	0	0	0	0	0	0	0	0	0	0	0	0	0	0	0	0	0	0	0	0	0	0	0	0	0	0	0	0	0	0	0	0	0	0	0	0	0	0	0	0	0	0
Zotu194	0	0	0	1	0	0	0	0	0	0	0	0	1	0	0	0	0	1	0	0	1	0	1	0	0	0	2002	2	19	0	0	0	2	0	1	0	0	1	0	0	0	0	1	0	0	0	0	0	0
Zotu1940	0	0	0	0	0	0	0	0	0	0	0	0	0	0	0	0	0	0	0	0	0	0	0	0	0	0	0	0	0	0	0	0	0	0	0	0	0	0	0	0	0	0	0	0	0	0	0	0	0
Zotu1941	0	0	0	0	0	0	0	0	0	0	0	0	0	0	0	0	0	0	0	0	0	0	0	0	0	0	0	0	0	0	0	0	0	0	0	0	0	0	0	0	0	0	0	0	0	0	0	0	0
Zotu1942	0	0	0	0	0	0	0	0	0	0	0	0	0	0	0	0	0	0	0	0	0	0	0	0	0	0	0	0	0	0	0	0	0	0	0	0	0	0	0	0	0	0	0	0	0	0	0	0	0
Zotu1943	0	0	0	0	0	0	0	0	0	0	0	0	0	0	0	0	0	0	0	0	0	0	0	0	0	0	0	0	0	0	0	0	0	0	0	0	0	0	0	0	0	0	0	0	0	0	0	0	0
Zotu1944	0	0	0	0	0	0	0	0	0	0	0	0	0	0	0	0	0	0	0	0	0	0	0	0	0	0	0	0	0	0	0	0	0	0	0	0	0	0	0	0	0	0	0	0	0	0	0	0	0
Zotu1945	0	0	0	0	0	0	0	0	0	0	0	0	0	0	0	0	0	0	0	0	0	0	0	0	0	0	0	0	0	0	0	0	0	0	0	0	0	0	0	0	0	0	0	0	0	0	0	0	0
Zotu1946	0	0	0	0	0	0	0	0	0	0	0	0	0	0	0	0	0	0	0	0	0	0	0	0	0	0	0	0	0	0	0	0	0	0	0	0	0	0	0	0	0	0	0	0	0	0	0	0	0
Zotu1947	0	0	0	0	0	0	0	0	0	0	0	0	0	0	0	0	0	0	0	0	0	0	0	0	0	0	0	0	0	0	0	0	0	0	0	0	0	0	0	0	0	0	0	0	0	0	0	0	0
Zotu1948	0	0	0	0	0	0	0	0	0	0	0	0	0	0	0	0	0	0	0	0	0	0	0	0	0	0	0	0	10	0	0	0	0	0	0	0	0	0	0	0	0	0	0	0	0	0	0	0	0
Zotu1949	0	0	0	0	0	0	0	0	0	0	0	0	0	0	0	0	0	0	0	0	0	0	0	0	0	0	0	0	0	0	0	0	0	0	0	0	0	0	0	0	0	0	0	0	0	0	0	0	0
Zotu195	0	0	0	0	0	2	0	0	0	0	0	0	0	0	0	0	0	0	0	0	0	0	0	1	0	0	0	0	0	0	0	0	0	0	0	0	0	0	1	0	0	0	0	0	0	0	0	0	0
Zotu1950	0	0	0	0	0	0	0	0	0	0	0	0	0	0	0	0	0	0	0	0	0	0	0	0	0	0	0	0	0	0	0	0	0	0	0	0	0	0	0	0	0	0	0	0	0	0	0	0	0
Zotu1951	0	0	0	0	0	0	0	0	0	0	0	0	0	0	0	0	0	0	0	0	0	0	0	0	0	0	0	0	0	0	0	0	0	0	0	0	0	0	0	0	0	0	0	0	0	0	0	0	0
Zotu1952	0	0	0	0	0	0	0	0	0	0	0	0	0	0	0	0	0	0	0	0	0	0	0	0	0	0	0	0	0	0	0	0	0	0	0	0	0	0	0	0	0	0	0	0	0	0	0	0	0
Zotu1953	0	0	0	0	0	0	0	0	0	0	0	0	0	0	0	0	0	0	0	0	0	0	0	0	0	0	0	0	0	0	0	0	0	0	0	0	0	0	0	0	0	0	0	0	0	0	0	0	0
Zotu1954	0	0	0	0	0	0	0	0	0	0	0	0	0	0	0	0	0	0	0	0	0	0	0	0	0	0	0	0	0	0	0	0	0	0	0	0	0	0	0	0	0	0	0	0	0	0	0	0	0
Zotu1955	0	0	0	0	0	0	0	0	0	0	0	0	0	0	0	0	0	0	0	0	0	0	0	0	0	0	0	0	0	0	0	0	0	0	0	0	0	0	0	0	0	0	0	0	0	0	0	0	0
Zotu1956	0	0	0	0	0	0	0	0	0	0	0	0	0	0	0	0	0	0	0	0	0	0	0	0	0	0	0	0	0	0	0	0	0	0	0	0	0	0	0	0	0	0	0	0	0	0	0	0	0
Zotu1957	0	0	0	0	0	0	0	0	0	0	0	0	0	0	0	0	0	0	0	0	0	0	0	0	0	0	0	0	0	0	0	0	0	0	0	0	0	0	0	0	0	0	0	0	0	0	0	0	0
Zotu1958	1	0	0	0	0	0	0	0	0	0	0	0	0	0	0	0	0	0	0	0	0	0	0	0	0	0	0	0	0	0	0	0	0	0	0	0	0	0	0	0	0	0	0	0	0	0	0	0	0
Zotu1959	0	0	0	0	0	0	0	0	0	0	0	0	0	0	0	0	0	0	0	0	0	0	0	0	0	0	0	0	0	0	0	0	0	0	0	0	0	0	0	0	0	0	0	0	0	0	0	0	0
Zotu196	2	0	0	1	0	0	0	0	0	0	0	0	0	0	0	0	0	18	0	0	0	0	0	0	0	0	0	120	18	0	1	0	0	0	0	0	0	1	0	0	0	0	0	0	0	0	0	0	0
Zotu1960	0	0	0	0	0	0	0	0	0	0	0	0	0	0	0	0	0	0	0	0	0	0	0	0	0	0	0	0	0	0	0	0	0	0	0	0	0	0	0	0	0	0	0	0	0	0	0	0	0
Zotu1961	0	0	0	0	0	0	0	0	0	0	0	0	0	0	0	0	0	0	0	0	0	0	0	0	0	0	0	0	0	0	0	0	0	0	0	0	0	0	0	0	0	0	0	0	0	0	0	0	0
Zotu1962	0	0	0	0	0	0	0	0	0	0	0	0	0	0	0	0	0	0	0	0	0	0	0	0	0	0	0	0	0	0	0	0	0	0	0	0	0	0	0	0	0	0	0	0	0	0	0	0	0
Zotu1963	0	0	0	0	0	0	0	0	0	0	0	0	0	0	0	0	0	0	0	0	0	0	0	0	0	0	0	0	0	0	0	0	0	0	0	0	0	0	0	0	0	0	0	0	0	0	0	0	0
Zotu1964	0	0	0	0	0	0	0	0	0	0	0	0	0	0	0	0	0	0	0	0	0	0	0	0	0	0	0	0	0	0	0	0	0	0	0	0	0	0	0	0	0	0	0	0	0	0	0	0	0
Zotu1965	0	0	0	0	0	0	0	0	0	0	0	0	0	0	0	0	0	0	0	0	0	0	0	0	0	0	0	0	0	0	0	0	0	0	0	0	0	0	0	0	0	0	0	0	0	0	0	0	0
Zotu1966	0	0	0	0	0	0	0	0	0	0	0	0	0	0	0	0	0	0	0	0	0	0	0	0	0	0	0	0	16	0	0	0	0	0	1	0	0	0	0	0	0	0	0	0	0	0	0	0	0
Zotu1967	0	0	0	0	0	0	0	0	0	0	0	0	0	0	0	0	0	0	0	0	0	0	0	0	0	0	0	0	0	0	0	0	0	0	0	0	0	0	0	0	0	0	0	0	0	0	0	0	0
Zotu1968	0	0	0	0	0	0	0	0	0	0	0	0	0	0	0	0	0	0	0	0	0	0	0	0	0	0	0	0	0	0	0	0	0	0	0	0	0	0	0	0	0	0	0	0	0	0	0	0	0
Zotu1969	0	0	0	0	0	0	0	0	0	0	0	0	0	0	0	0	0	0	0	0	0	0	0	0	0	0	0	0	0	0	0	0	0	0	0	0	0	0	0	0	0	0	0	0	0	0	0	0	0
Zotu197	0	0	0	0	0	0	0	0	0	1	0	0	0	0	0	0	0	5	0	0	0	0	0	0	0	0	223	0	0	0	0	0	1	0	0	0	0	0	0	0	0	0	0	1606	0	0	0	0	1
Zotu1970	0	0	0	0	0	0	0	0	0	0	0	0	0	0	0	0	0	0	0	0	0	0	0	0	0	0	0	0	0	0	0	0	0	0	0	0	0	0	0	0	0	0	0	0	0	0	0	0	0
Zotu1971	0	0	0	0	0	0	0	0	0	0	0	0	0	0	0	0	0	0	0	0	0	0	0	0	0	0	0	0	0	0	0	0	0	0	0	0	0	0	0	0	0	0	0	0	0	0	0	0	0
Zotu1972	0	0	0	0	0	0	0	0	0	0	0	0	0	0	0	0	0	0	0	0	0	0	0	0	0	0	0	0	0	0	0	0	0	0	0	0	0	0	0	0	0	0	0	0	0	0	0	0	0
Zotu1973	0	0	0	0	0	0	0	0	0	0	0	0	0	0	0	0	0	0	0	0	0	0	0	0	0	0	0	0	0	0	0	0	0	0	0	0	0	0	0	0	0	0	0	0	0	0	0	0	0
Zotu1974	0	0	0	0	0	0	0	0	0	0	0	0	0	0	0	0	0	0	0	0	0	0	0	0	0	0	71	0	0	0	0	0	0	0	0	0	0	0	0	0	0	0	0	0	0	0	0	0	0
Zotu1975	0	0	0	0	0	0	0	0	0	0	0	0	0	0	0	0	0	0	0	0	0	0	0	0	0	0	0	0	0	0	0	0	0	0	0	0	0	0	0	0	0	0	0	0	0	0	0	0	0
Zotu1976	0	0	0	0	0	0	0	0	0	0	0	0	0	0	0	0	0	0	0	0	0	0	0	0	0	0	0	0	0	0	0	0	0	0	0	0	0	0	0	0	0	0	0	0	0	0	0	0	0
Zotu1977	0	0	0	0	0	0	0	0	0	0	0	0	0	0	0	0	0	0	0	0	0	0	0	0	0	0	0	0	0	0	0	0	0	0	0	0	0	0	0	0	0	0	0	0	0	0	0	0	0
Zotu1978	0	0	0	0	0	0	0	0	0	0	0	0	0	0	0	0	0	0	0	0	0	0	0	0	0	0	0	0	0	0	0	0	0	0	0	0	0	0	0	0	0	0	0	0	0	0	0	0	0
Zotu1979	0	0	0	0	0	0	0	0	0	0	0	0	0	0	0	0	0	0	0	0	0	0	0	0	0	0	0	0	0	0	0	0	0	0	0	0	0	0	0	0	0	0	0	0	0	0	0	0	0
Zotu198	0	0	0	0	78	0	0	0	0	0	0	0	0	0	0	0	0	0	0	0	0	0	0	0	0	0	0	0	17	0	0	0	0	0	0	0	0	0	0	0	0	0	0	0	0	0	0	0	0
Zotu1980	0	0	0	0	0	0	0	0	0	0	0	0	0	0	0	0	0	0	0	0	0	0	0	0	0	0	0	0	0	0	0	0	0	0	0	0	0	0	0	0	0	0	0	0	0	0	0	0	0
Zotu1981	0	0	0	0	0	0	0	0	0	0	0	0	0	0	0	0	0	0	0	0	0	0	0	0	0	0	0	0	0	0	0	0	0	0	0	0	0	0	0	0	0	0	0	0	0	0	0	0	0
Zotu1982	0	0	0	0	0	0	0	0	0	0	0	0	0	0	0	0	0	0	0	0	0	0	0	0	0	0	1	0	0	0	0	0	0	0	0	0	0	0	0	0	0	0	0	0	0	0	0	0	0
Zotu1983	0	0	0	0	0	0	0	0	0	0	0	0	0	0	0	0	0	0	0	0	0	0	0	0	0	0	0	0	0	0	0	0	0	0	0	0	0	0	0	0	0	0	0	0	0	0	0	0	0
Zotu1984	0	0	0	0	0	0	0	0	0	0	0	0	0	0	0	0	0	0	0	0	0	0	0	0	0	0	0	0	0	0	0	0	0	0	0	0	0	0	0	0	0	0	0	0	0	0	0	0	0
Zotu1985	0	0	0	0	0	0	0	0	0	0	0	0	0	0	0	0	0	0	0	0	0	0	0	0	0	0	0	0	0	0	0	0	0	0	0	0	0	0	0	0	0	0	0	0	0	0	0	0	0
Zotu1986	0	0	0	0	0	0	0	0	0	0	0	0	0	0	0	0	0	0	0	0	0	0	0	0	0	0	0	0	0	0	0	0	1	0	0	0	0	0	0	0	0	0	0	0	0	0	0	0	0
Zotu1987	0	0	0	0	0	0	0	0	0	0	0	0	0	0	0	0	0	0	0	0	0	0	0	0	0	0	0	0	0	0	0	0	0	0	0	0	0	0	0	0	0	0	0	0	0	0	0	0	0
Zotu1988	0	0	0	0	0	0	0	0	0	0	0	0	0	0	0	0	0	0	0	0	0	0	0	0	0	0	0	0	0	0	0	0	0	0	0	0	0	0	0	0	0	0	0	0	0	0	0	0	0
Zotu1989	0	0	0	0	0	0	0	0	0	0	0	0	0	0	0	0	0	0	0	0	0	0	0	0	0	0	0	0	0	0	0	0	0	0	0	0	0	0	0	0	0	0	0	0	0	0	0	0	0
Zotu199	0	0	0	0	0	0	0	0	0	0	0	0	1	0	0	0	0	0	0	0	1	0	1	0	0	0	6830	0	1	0	1	1	1	0	0	0	0	0	0	0	0	0	0	6	0	0	0	0	0
Zotu1990	0	0	0	0	0	0	0	0	0	0	0	0	0	0	0	0	0	0	0	0	0	0	0	0	0	0	0	0	0	0	0	0	0	0	0	0	0	0	0	0	0	0	0	0	0	0	0	0	0
Zotu1991	0	0	0	0	0	0	0	0	0	2	0	0	0	0	0	0	12	0	0	0	0	0	0	0	0	0	0	0	0	0	0	0	11	0	0	0	0	0	0	0	0	0	0	0	0	0	0	0	0
Zotu1992	0	0	0	0	0	0	0	0	0	0	0	0	0	0	0	0	0	0	0	0	0	0	0	0	0	0	0	0	0	0	0	0	0	0	0	0	0	0	0	0	0	0	0	0	0	0	0	0	0
Zotu1993	0	0	0	0	0	0	0	0	0	0	0	0	0	0	0	0	0	0	0	0	0	0	0	0	0	0	0	0	0	0	0	0	0	0	0	0	0	0	0	0	0	0	0	0	0	0	0	0	0
Zotu1994	0	0	0	0	0	0	0	0	0	0	0	0	0	0	0	0	0	0	0	0	0	0	0	0	0	0	0	0	0	0	0	0	0	0	0	0	0	0	0	0	0	0	0	0	0	0	0	0	0
Zotu1995	0	0	0	0	0	0	0	0	0	0	0	0	0	0	0	0	0	0	0	0	0	0	0	0	0	0	0	0	0	0	0	0	0	0	0	0	0	0	0	0	0	0	0	0	0	0	0	0	0
Zotu1996	0	0	0	0	0	0	0	0	0	0	0	0	0	0	0	0	0	0	0	0	0	0	0	0	0	0	0	0	0	0	0	0	0	0	0	0	0	0	0	0	0	0	0	0	0	0	0	0	0
Zotu1997	0	0	0	0	0	0	0	0	0	0	0	0	0	0	0	0	0	0	0	0	0	0	0	0	0	0	0	0	0	0	0	0	0	0	0	0	0	0	0	0	0	0	0	0	0	0	0	0	0
Zotu1998	0	0	0	0	0	0	0	0	0	0	0	0	0	0	0	0	0	0	0	0	0	0	0	0	0	0	0	0	0	0	0	0	0	0	0	0	0	0	0	0	0	0	0	0	0	0	0	0	0
Zotu1999	0	0	0	0	0	0	0	0	0	0	0	0	0	0	0	0	0	0	0	0	0	0	0	0	0	0	0	0	0	0	0	0	0	0	0	0	0	0	0	0	0	0	0	0	0	0	0	0	0
Zotu2	1	2	1	0	222	2	8	18	21	459	13	3	14	3	3	1	3	1131	11	4	14	13	3	1	4	2	8	15	95	1	8	15	4	8	4	7	4479	4	5	1	3	7	11	10	1	4	4	10	3
Zotu20	0	0	0	0	0	1	0	0	1	1	0	4	0	0	0	0	0	7	0	0	0	0	5	1	0	0	1	2	1	0	0	1	0	0	0	0	2	3	1	1	1	1	0	0	0	2	3	1	0
Zotu200	0	0	0	0	0	0	0	0	0	0	0	0	0	0	0	0	0	8	0	0	0	0	0	0	0	0	0	0	1	0	0	0	0	0	0	0	0	0	0	0	0	0	0	0	0	0	0	0	0
Zotu2000	0	0	0	0	0	0	0	0	0	0	0	0	0	0	0	0	0	0	0	0	0	0	0	0	0	0	0	0	0	0	0	0	0	0	0	0	0	0	0	0	0	0	0	0	0	0	0	0	0
Zotu2001	0	0	0	0	0	0	0	0	0	0	0	0	0	0	0	0	0	0	0	0	0	0	0	0	0	0	0	0	0	0	0	0	0	0	0	0	0	0	0	0	0	0	0	0	0	0	0	0	0
Zotu2002	0	0	0	0	0	0	0	0	0	0	0	0	0	0	0	0	0	0	0	0	0	0	0	0	0	0	0	0	0	0	0	0	0	0	0	0	0	0	0	0	0	0	0	0	0	0	0	0	0
Zotu2003	0	0	0	0	0	0	0	0	0	0	0	0	0	0	0	0	0	0	0	0	0	0	0	0	0	0	0	0	0	0	0	0	0	0	0	0	0	0	0	0	0	0	0	0	0	0	0	0	0
Zotu2004	0	0	0	0	0	0	0	0	0	0	0	0	0	0	0	0	0	0	0	0	0	0	0	0	0	0	0	0	0	0	0	0	0	0	0	0	0	0	0	0	0	0	0	0	0	0	0	0	0
Zotu2005	0	0	0	0	0	0	0	0	0	0	0	0	0	0	0	0	0	0	0	0	0	0	0	0	0	0	0	0	0	0	0	0	0	0	0	0	0	0	0	0	0	0	0	0	0	0	0	0	0
Zotu2006	0	0	0	0	0	0	0	0	0	0	0	0	0	0	0	0	0	0	0	0	0	0	0	0	0	0	0	0	0	0	0	0	0	0	0	0	0	0	0	0	0	0	0	0	0	0	0	0	0
Zotu2007	0	0	0	0	0	0	0	0	0	0	0	0	0	0	0	0	0	0	0	0	0	0	0	0	0	0	0	6	0	0	0	0	0	0	0	0	0	0	0	0	0	0	0	0	0	0	0	0	0
Zotu2008	0	0	0	0	0	0	0	0	0	0	0	0	0	0	0	0	0	0	0	0	0	0	0	0	0	0	0	0	0	0	0	0	0	0	0	0	0	0	0	0	0	0	0	0	0	0	0	0	0
Zotu2009	0	0	0	0	0	0	0	0	0	0	0	0	0	0	0	0	0	0	0	0	0	0	0	0	0	0	0	0	0	0	0	0	0	0	0	0	0	0	0	0	0	0	0	0	0	0	0	0	0
Zotu201	0	0	0	0	0	0	0	0	0	0	0	0	0	0	0	0	0	0	0	0	0	0	0	0	0	0	0	0	0	0	0	0	0	0	0	0	0	0	0	0	0	0	0	0	0	0	1	0	0
Zotu2010	0	0	0	0	0	0	0	0	0	0	0	0	0	0	0	0	0	0	0	0	0	0	0	0	0	0	0	0	0	0	0	0	0	0	0	0	0	0	0	0	0	0	0	0	0	0	0	0	0
Zotu2011	0	0	0	0	0	0	0	0	0	0	0	0	0	0	0	0	0	0	0	0	0	0	0	0	0	0	0	0	0	0	0	0	0	0	0	0	0	0	0	0	0	0	0	0	0	0	0	0	0
Zotu2012	0	0	0	0	0	0	0	0	0	0	0	0	0	0	0	0	0	0	0	0	0	0	0	0	0	0	0	0	0	0	0	0	0	0	0	0	0	0	0	0	0	0	0	0	0	0	0	0	0
Zotu2013	0	0	0	0	0	0	0	0	0	0	0	0	0	0	0	0	0	0	0	0	0	0	0	0	0	0	0	0	0	0	0	0	0	0	0	0	0	0	0	0	0	0	0	0	0	0	0	0	0
Zotu2014	0	0	0	0	0	0	0	0	0	0	0	0	0	0	0	0	0	0	0	0	0	0	0	0	0	0	0	0	0	0	0	0	0	0	0	0	0	0	0	0	0	0	0	0	0	0	0	0	0
Zotu2015	0	0	0	0	0	0	0	0	0	0	0	0	0	0	0	0	0	0	0	0	0	0	0	0	0	0	0	0	0	0	0	0	0	0	0	0	0	0	0	0	0	0	0	0	0	0	0	0	0
Zotu2016	0	0	0	0	0	0	0	0	0	0	0	0	0	0	0	0	0	0	0	0	0	0	0	0	0	0	0	0	0	0	0	0	0	0	0	0	0	0	0	0	0	0	0	0	0	0	0	0	0
Zotu2017	0	0	0	0	0	0	0	0	0	0	0	0	0	0	0	0	0	0	0	0	0	0	0	0	0	0	0	0	0	0	0	0	0	0	0	0	0	0	0	0	0	0	0	0	0	0	0	0	0
Zotu2018	0	0	0	0	0	0	0	0	0	0	0	0	0	0	0	0	0	0	0	0	0	0	0	0	0	0	0	0	0	0	0	0	0	0	0	0	0	0	0	0	0	0	0	0	0	0	0	0	0
Zotu2019	0	0	0	0	0	0	0	0	0	0	0	0	0	0	0	0	0	0	0	0	0	0	0	0	0	0	0	0	0	0	0	0	0	0	0	0	0	0	0	0	0	0	0	0	0	0	0	0	0
Zotu202	0	0	0	0	0	0	0	0	0	0	0	0	0	0	0	0	0	0	0	0	0	0	0	0	0	0	0	0	0	0	0	0	0	0	0	0	0	0	0	0	0	0	0	0	0	0	0	0	0
Zotu2020	0	0	0	0	0	0	0	0	0	0	0	0	0	0	0	0	0	0	0	0	0	0	0	0	0	0	0	0	0	0	0	0	0	0	0	0	0	0	0	0	0	0	0	0	0	0	0	0	0
Zotu2021	0	0	0	0	0	0	0	0	0	0	0	0	0	0	0	0	0	0	0	0	0	0	0	0	0	0	0	0	0	0	0	0	0	0	0	0	0	0	0	0	0	0	0	0	0	0	0	0	0
Zotu2022	0	0	0	0	0	0	0	0	0	0	0	0	0	0	0	0	0	0	0	0	0	0	0	0	0	0	0	0	16	0	0	0	0	0	0	0	0	0	0	0	0	0	0	0	0	0	0	0	0
Zotu2023	0	0	0	0	0	0	0	0	0	0	0	0	0	0	0	0	0	7	0	0	0	0	0	0	0	0	0	0	0	0	0	0	0	0	0	0	0	0	0	0	0	0	0	0	0	0	0	0	0
Zotu2024	0	0	0	0	0	0	0	0	0	0	0	0	0	0	0	0	0	0	0	0	0	0	0	0	0	0	0	0	0	0	0	0	0	0	0	0	0	0	0	0	0	0	0	0	0	0	0	0	0
Zotu2025	0	0	0	0	0	0	0	0	0	0	0	0	0	0	0	0	0	0	0	0	0	0	0	0	0	0	0	0	0	0	0	0	0	0	0	0	0	0	0	0	0	0	0	0	0	0	0	0	0
Zotu2026	0	0	0	0	0	0	0	0	0	0	0	0	0	0	0	0	0	0	0	0	0	0	0	0	0	0	0	0	0	0	0	0	0	0	0	0	0	0	0	0	0	0	0	0	0	0	0	0	0
Zotu2027	0	0	0	0	0	0	0	0	0	0	0	0	0	0	0	0	0	0	0	0	0	0	0	0	0	0	0	0	0	0	0	0	0	0	0	0	0	0	0	0	0	0	0	0	0	0	0	0	0
Zotu2028	0	0	0	0	0	0	0	0	0	0	0	0	0	0	0	0	0	0	0	0	0	0	0	0	0	0	0	0	0	0	0	0	0	0	0	0	0	0	0	0	0	0	0	0	0	0	0	0	0
Zotu2029	0	0	0	0	0	0	0	0	0	0	0	0	0	0	0	0	0	0	0	0	0	0	0	0	0	0	0	0	0	0	0	0	0	0	0	0	0	0	0	0	0	0	0	0	0	0	0	0	0
Zotu203	0	0	0	0	0	0	0	0	0	0	0	0	0	3	0	0	2	0	0	0	0	0	0	3	0	0	0	0	0	0	0	0	0	0	0	0	0	0	0	0	0	0	0	0	0	0	0	0	0
Zotu2030	0	0	0	0	0	0	0	0	0	0	0	0	0	0	0	0	0	0	0	0	0	0	0	0	0	0	0	0	0	0	0	0	0	0	0	0	0	0	0	0	0	10	0	0	0	0	0	0	0
Zotu2031	0	0	0	0	0	0	0	0	0	0	0	0	0	0	0	0	0	0	0	0	0	0	0	0	0	0	0	0	0	0	0	0	0	0	0	0	0	0	0	0	0	0	0	0	0	0	0	0	0
Zotu2032	0	0	0	0	0	0	0	0	0	0	0	0	0	0	0	0	0	0	0	0	0	0	0	0	0	0	0	0	0	0	0	0	0	0	0	0	0	0	0	0	0	0	0	0	0	0	0	0	0
Zotu2033	0	0	0	0	0	0	0	0	0	0	0	0	0	0	0	0	0	0	0	0	0	0	0	0	0	0	0	0	0	0	0	0	0	0	0	0	0	0	0	0	0	0	0	0	0	0	0	0	0
Zotu2034	0	0	0	0	0	0	0	0	0	0	0	0	0	0	0	0	0	0	0	0	0	0	0	0	0	0	0	0	0	0	0	0	0	0	0	0	0	0	0	0	0	0	0	0	0	0	0	0	0
Zotu2035	0	0	0	0	0	0	0	0	0	0	0	0	0	0	0	0	0	0	0	0	0	0	0	0	0	0	0	0	0	0	0	0	0	0	0	0	0	0	0	0	0	0	0	0	0	0	0	0	0
Zotu2036	0	0	0	0	0	0	0	0	0	0	0	0	0	0	0	0	0	0	0	0	0	0	0	0	0	0	0	0	0	0	0	0	0	0	0	0	0	0	0	0	0	0	0	0	0	0	0	0	0
Zotu2037	0	0	0	0	0	0	0	0	0	0	0	0	0	0	0	0	0	0	0	0	0	0	0	0	0	0	0	0	0	0	0	0	0	0	0	0	0	0	0	0	0	0	0	0	0	0	0	0	0
Zotu2038	0	0	0	0	0	0	0	0	0	0	0	0	0	0	0	0	0	0	0	0	0	0	0	0	0	0	0	0	0	0	0	0	0	0	0	0	0	0	0	0	0	0	0	0	0	0	0	0	0
Zotu2039	0	0	0	0	0	0	0	0	0	0	0	0	0	0	0	0	0	0	0	0	0	0	0	0	0	0	0	0	0	0	0	0	0	0	0	0	0	0	0	0	0	0	0	0	0	0	0	0	0
Zotu204	0	0	0	0	0	0	0	0	0	0	0	0	0	0	0	0	0	0	0	0	1	0	0	0	0	0	0	0	1	0	0	0	0	0	0	0	0	0	0	0	0	0	0	0	0	1	0	0	0
Zotu2040	0	0	0	0	0	0	0	0	0	0	0	0	0	0	0	0	0	0	0	51	0	0	0	0	0	0	0	0	0	0	0	0	0	0	0	0	0	0	0	0	0	0	0	0	0	0	0	0	0
Zotu2041	0	0	0	0	0	0	0	0	0	0	0	0	0	0	0	0	0	0	0	0	0	0	0	0	0	0	0	0	0	0	0	0	0	0	0	0	0	0	0	0	0	0	0	0	0	0	0	0	0
Zotu2042	0	0	0	0	0	0	0	0	0	0	0	0	0	0	0	0	0	0	0	0	0	0	0	0	0	0	0	0	0	0	0	0	0	0	0	0	0	0	0	0	0	0	0	0	0	0	0	0	0
Zotu2043	0	0	0	0	0	0	0	0	0	0	0	0	0	0	0	0	0	0	0	0	0	0	0	0	0	0	0	0	0	0	0	0	0	0	0	0	0	0	0	0	0	0	0	0	0	0	0	0	0
Zotu2044	0	0	0	0	0	0	0	0	0	0	0	0	0	0	0	0	0	0	0	0	0	0	0	0	0	0	0	0	0	0	0	0	0	0	0	0	0	0	0	0	0	0	0	0	0	0	0	0	0
Zotu2045	0	0	0	0	0	0	0	0	0	0	0	0	0	0	0	0	0	0	0	0	0	0	0	0	0	0	0	0	0	0	0	0	0	0	0	0	0	0	0	0	4	0	0	0	0	0	0	0	0
Zotu2046	0	0	0	0	0	0	0	0	0	0	0	0	0	0	0	0	0	0	0	0	0	0	0	0	0	0	0	0	0	0	0	0	0	0	0	0	0	0	0	0	0	0	0	0	0	0	0	0	0
Zotu2047	0	0	0	0	0	0	0	0	0	0	0	0	0	0	0	0	0	0	0	0	0	0	0	0	0	0	0	0	0	0	0	0	0	0	0	0	0	0	0	0	0	0	0	0	0	0	0	0	0
Zotu2048	0	0	0	0	0	0	0	0	0	0	0	0	0	0	0	0	0	0	0	0	0	0	0	0	0	0	0	0	0	0	0	0	0	0	0	0	0	0	0	0	0	0	0	0	0	0	0	0	0
Zotu2049	0	0	0	0	0	0	0	0	0	0	12	0	0	0	0	0	0	0	0	0	0	0	0	0	0	0	0	0	0	0	0	4	0	0	0	0	0	1	0	0	0	0	0	0	0	6	13	4	0
Zotu205	0	1	0	0	0	0	0	0	0	0	0	0	0	0	0	0	0	0	0	0	0	0	0	0	2	0	0	0	29	0	1	0	0	0	0	0	3	0	0	0	0	2	0	0	0	0	0	0	0
Zotu2050	0	0	0	0	0	0	0	0	0	0	0	0	0	0	0	0	0	0	0	0	0	0	0	0	0	0	0	0	0	0	0	0	0	0	0	0	0	0	0	0	0	0	0	0	0	0	0	0	0
Zotu2051	0	0	0	0	0	0	0	0	0	0	0	0	0	0	0	0	0	0	0	0	0	0	0	0	0	0	0	0	9	0	0	0	0	0	0	0	0	0	0	0	0	0	0	0	0	0	0	0	0
Zotu2052	0	0	0	0	0	0	0	0	0	0	0	0	0	0	0	0	0	0	0	0	0	0	0	0	0	0	0	0	0	0	0	0	0	0	0	0	0	0	0	0	0	0	0	0	0	0	0	0	0
Zotu2053	0	0	0	0	0	0	0	0	0	0	0	0	0	0	0	0	0	0	0	0	0	0	0	0	0	0	0	0	0	0	0	0	12	0	0	0	0	0	0	0	0	0	0	0	0	0	0	0	0
Zotu2054	0	0	0	0	0	0	0	0	0	0	0	0	0	0	0	0	0	0	0	0	0	0	0	0	0	0	0	0	0	0	0	0	0	0	0	0	0	0	0	0	0	0	0	0	0	0	0	0	0
Zotu2055	0	0	0	0	0	0	0	0	0	0	0	0	0	0	0	0	0	0	0	0	0	0	0	0	0	0	0	0	0	0	0	0	0	0	0	0	0	0	0	0	0	0	0	0	0	0	0	0	0
Zotu2056	0	0	0	0	0	0	0	0	0	0	0	0	0	0	0	0	0	0	0	0	0	0	0	0	0	0	0	0	0	0	0	0	0	0	0	0	0	0	0	0	1	0	0	0	0	2	0	0	0
Zotu2057	0	0	0	0	0	0	0	0	0	0	0	0	0	0	0	0	0	0	0	0	0	0	0	0	0	0	0	0	0	0	0	0	0	0	0	0	0	0	0	0	0	0	0	0	0	0	0	0	0
Zotu2058	0	0	0	0	0	0	0	0	0	0	0	0	0	0	0	0	0	0	0	0	0	0	0	0	0	0	0	0	0	0	0	0	0	0	0	0	0	0	0	0	0	0	0	0	0	0	0	0	0
Zotu2059	0	0	0	0	0	0	0	0	0	0	0	0	0	0	0	0	0	0	0	0	0	0	0	0	0	0	0	0	0	0	0	0	0	0	0	0	0	0	0	0	0	0	0	0	0	0	0	0	0
Zotu206	0	0	0	0	0	0	0	0	0	0	0	0	0	0	0	0	0	0	0	0	0	0	0	1	0	0	0	0	0	0	0	0	0	0	0	0	0	0	0	0	0	0	0	0	0	0	0	0	0
Zotu2060	0	0	0	0	0	0	0	0	0	0	0	0	0	0	0	0	0	0	0	0	0	0	0	0	0	0	0	0	0	0	0	0	0	0	0	0	0	0	0	0	0	0	0	0	0	0	0	0	0
Zotu2061	0	0	0	0	0	0	0	0	0	0	0	0	0	0	0	0	0	0	0	0	0	0	0	0	0	0	0	0	0	0	0	0	0	0	0	0	0	0	0	0	0	0	0	0	0	0	0	0	0
Zotu2062	0	0	0	0	0	0	0	0	0	0	0	0	0	0	0	0	0	0	0	0	0	0	0	0	0	0	0	0	0	0	0	0	0	0	0	0	0	0	0	0	0	0	0	0	0	0	0	0	0
Zotu2063	0	0	0	0	0	0	0	0	0	0	0	0	0	0	0	0	0	0	0	0	0	0	0	0	0	0	0	0	0	0	0	0	0	0	0	0	0	0	0	0	0	0	0	0	0	0	0	0	0
Zotu2064	0	0	0	0	0	0	0	0	0	0	0	0	0	0	0	0	0	0	0	0	0	0	0	0	0	0	0	0	0	0	0	0	0	0	0	0	0	0	0	0	0	0	0	0	0	0	0	0	0
Zotu2065	0	0	0	0	0	0	0	0	0	0	0	0	0	0	0	0	0	0	0	0	0	0	0	0	0	0	0	0	0	0	0	0	0	0	0	0	0	0	0	0	0	0	0	0	0	0	0	0	0
Zotu2066	0	0	0	0	0	0	0	0	0	0	0	0	0	0	0	0	0	0	0	0	0	0	0	0	0	0	0	0	0	0	0	0	0	0	0	0	0	0	0	0	0	0	0	0	0	0	0	0	0
Zotu2067	0	0	0	0	0	0	0	0	0	0	0	0	0	0	0	0	0	0	0	0	0	0	0	0	0	0	0	0	0	0	0	0	0	0	0	0	0	0	0	0	0	0	0	0	0	0	0	0	0
Zotu2068	0	0	0	0	0	0	0	0	0	0	0	0	0	0	0	0	0	0	0	0	0	0	0	0	0	0	0	0	0	0	0	0	0	0	0	0	0	0	0	0	0	0	0	0	0	0	0	0	0
Zotu2069	0	0	0	0	0	0	0	0	0	0	0	0	0	0	0	0	0	0	0	0	0	0	0	0	0	0	0	0	0	0	0	0	0	0	0	0	0	0	0	0	0	0	0	0	0	10	0	0	0
Zotu207	0	0	0	0	0	0	0	0	0	0	0	0	0	0	0	0	0	0	0	0	0	0	1	0	0	0	0	0	0	0	0	0	0	0	0	0	0	3	0	0	0	0	0	0	0	0	0	0	0
Zotu2070	0	0	0	0	0	0	0	0	0	0	0	0	0	0	0	0	0	0	0	0	0	0	0	0	0	0	57	0	0	0	0	0	0	0	0	0	0	0	0	0	0	0	0	0	0	0	0	0	0
Zotu2071	0	0	0	0	0	0	0	0	0	0	0	0	0	0	0	0	0	0	0	0	0	0	0	0	0	0	0	0	0	0	0	0	0	0	0	0	0	0	0	0	0	0	0	0	0	0	0	0	0
Zotu2072	0	0	0	0	0	0	0	0	0	0	0	0	0	0	0	0	0	0	0	0	0	0	0	0	0	0	0	0	0	0	0	0	0	0	0	0	0	0	0	0	0	0	0	0	0	0	0	0	0
Zotu2073	0	0	0	0	0	0	0	0	0	0	0	0	0	0	0	0	0	0	0	0	0	35	0	0	0	0	0	0	0	0	0	0	0	0	0	0	0	0	0	0	0	0	0	0	0	0	0	0	0
Zotu2074	0	0	0	0	4	0	0	0	0	0	0	0	0	0	0	0	0	0	0	0	0	0	0	0	0	0	0	0	0	0	0	54	8	0	0	0	0	0	0	0	0	51	0	0	0	0	0	3	0
Zotu2075	0	0	0	0	0	0	0	0	0	0	0	0	0	0	0	0	0	0	0	0	0	0	0	0	0	0	0	0	0	0	0	0	0	0	0	0	0	0	0	0	0	0	0	0	0	0	0	0	0
Zotu2076	0	0	0	0	0	0	0	0	0	0	0	0	0	0	0	0	0	0	0	0	0	0	0	0	0	0	0	0	0	0	0	0	0	0	0	0	0	0	0	0	0	0	0	0	0	0	0	0	0
Zotu2077	0	0	0	0	0	0	0	0	0	0	0	0	0	0	0	0	0	0	0	0	0	0	0	0	0	0	0	0	0	0	0	0	0	0	0	0	0	0	0	0	0	0	0	0	0	0	0	0	0
Zotu2078	0	0	0	0	0	0	0	0	0	0	0	0	0	0	0	0	0	0	0	0	0	0	0	0	0	0	0	0	0	0	0	0	0	0	0	0	0	0	0	0	0	0	0	0	0	0	0	0	0
Zotu2079	0	0	0	0	0	0	0	0	0	0	0	0	0	0	0	0	0	0	0	0	0	0	0	0	0	0	0	0	0	0	0	0	0	0	0	0	0	0	0	0	0	0	0	0	0	0	0	0	0
Zotu208	0	0	0	0	0	0	0	0	0	0	0	0	0	0	0	0	0	0	0	0	0	0	0	2	0	0	0	0	0	0	0	0	0	0	0	0	0	0	0	0	0	0	0	0	0	0	0	0	0
Zotu2080	0	0	0	0	0	0	0	0	0	0	0	0	0	0	0	0	0	0	0	0	0	0	0	0	0	0	0	0	0	0	0	0	0	0	0	0	0	0	0	0	0	0	0	0	0	0	0	0	0
Zotu2081	0	0	0	0	0	0	0	0	0	0	0	0	0	0	0	0	0	0	0	0	0	0	0	0	0	0	0	0	0	0	0	0	0	0	0	0	0	0	0	0	0	0	0	0	0	0	0	0	0
Zotu2082	0	0	0	0	0	0	0	0	0	0	0	0	0	0	0	0	0	0	0	0	0	0	0	0	0	0	0	0	0	0	0	0	0	0	0	0	0	0	0	0	0	0	0	0	0	0	0	0	0
Zotu2083	0	0	0	0	0	0	0	0	0	0	0	0	0	0	0	0	0	0	0	0	0	0	0	0	0	0	0	0	0	0	0	0	0	0	0	0	0	0	0	0	0	0	0	0	0	0	0	0	0
Zotu2084	0	0	0	0	0	0	0	0	0	0	0	0	0	0	0	0	0	0	0	0	0	0	0	0	0	0	0	0	0	0	0	0	0	0	0	1	0	0	0	0	0	0	0	0	0	0	0	0	0
Zotu2085	0	0	0	0	0	0	0	0	0	0	0	0	0	0	0	0	0	0	0	0	0	0	0	0	0	0	0	0	0	0	0	0	0	0	0	0	0	0	0	0	0	0	0	0	0	0	0	0	0
Zotu2086	0	0	0	0	0	0	0	0	0	0	0	0	0	0	0	0	0	0	0	0	0	0	0	0	0	0	0	0	0	0	0	0	0	0	0	0	0	0	0	0	0	0	0	0	0	0	0	0	0
Zotu2087	0	0	0	0	0	0	0	0	0	0	0	0	0	0	0	0	0	0	0	0	0	0	0	0	0	0	0	0	0	0	0	0	0	0	0	0	0	0	0	0	0	0	0	0	0	0	0	0	0
Zotu2088	0	0	0	0	0	0	0	0	0	0	0	0	0	0	0	0	0	0	0	0	0	0	0	0	0	0	0	0	0	0	0	0	0	0	0	0	0	0	0	0	0	0	0	0	0	0	0	0	0
Zotu2089	0	0	0	0	0	0	0	0	0	0	0	0	0	0	0	0	0	0	0	0	0	0	0	0	0	0	0	0	0	0	0	0	0	0	0	0	0	0	0	0	0	0	0	0	0	0	0	0	0
Zotu209	0	0	0	0	1	0	0	0	0	0	0	0	0	0	0	0	0	0	0	0	0	0	0	1	1	0	0	0	0	0	0	0	0	0	1	0	0	0	0	0	0	0	0	0	0	0	0	0	0
Zotu2090	0	0	0	0	0	0	0	0	0	0	0	0	0	0	0	0	0	0	0	0	0	0	0	0	0	0	0	0	0	0	0	0	0	0	0	0	0	0	0	0	0	0	0	0	0	0	0	0	0
Zotu2091	0	0	0	0	0	0	0	0	0	0	0	0	0	0	0	0	0	0	0	0	0	0	0	0	0	0	0	0	0	0	0	0	0	0	0	0	0	0	0	0	0	0	0	0	0	0	0	0	0
Zotu2092	0	0	0	0	0	0	0	0	0	0	0	0	0	0	0	0	0	0	0	0	0	0	0	0	0	0	0	0	0	0	0	0	0	0	0	0	0	0	0	0	0	0	0	0	0	0	0	0	0
Zotu2093	0	0	0	0	0	0	0	0	0	0	0	0	0	0	0	0	0	0	0	0	0	0	0	0	0	0	0	0	0	0	0	0	0	0	0	0	0	0	0	0	0	0	0	0	0	0	0	0	0
Zotu2094	0	0	0	0	0	0	0	0	0	0	1	0	4	0	0	0	6	0	0	0	0	0	0	0	0	0	0	0	0	0	0	0	0	0	0	0	0	0	0	0	0	0	0	0	0	0	0	0	0
Zotu2095	0	0	26	0	0	0	0	0	0	0	0	0	0	0	0	0	0	0	0	0	0	0	0	0	0	0	0	0	0	0	0	0	0	0	0	0	0	0	0	0	0	0	0	0	0	0	0	0	0
Zotu2096	0	0	0	0	0	0	0	0	0	0	0	0	0	0	0	0	0	0	0	0	0	0	0	0	0	0	0	0	0	0	0	0	0	0	0	0	0	0	0	0	0	0	0	0	0	0	0	0	0
Zotu2097	0	0	0	0	0	0	0	0	0	0	0	0	0	0	0	0	0	0	0	0	0	0	0	0	0	0	0	0	0	0	0	0	0	0	0	0	0	0	0	0	0	0	0	0	0	0	0	0	0
Zotu2098	0	0	0	0	0	0	0	0	0	0	0	0	0	0	0	0	0	0	0	0	0	0	0	0	0	0	0	0	0	0	0	0	0	0	0	0	0	0	0	0	0	0	0	0	0	0	0	0	0
Zotu2099	0	0	0	0	0	0	0	0	0	0	0	0	0	0	0	0	0	0	0	0	0	0	0	0	0	0	0	0	0	0	0	0	0	0	0	0	0	0	0	0	0	0	0	0	0	0	0	0	0
Zotu21	2	0	4	1	3	0	0	2	1	517	0	0	3	0	1	0	3	176	2	0	0	1050	67	1	1	1	5	155	1383	1	0	1	1	3	1	1	1	1	2	0	2	1	0	4	0	6	2	0	0
Zotu210	0	0	0	0	0	0	0	0	0	0	0	0	0	0	0	0	0	0	0	0	0	0	0	0	0	0	0	0	0	1	0	0	0	0	0	0	0	0	18	0	1	0	0	6	1	0	0	0	0
Zotu2100	0	0	0	0	0	0	0	0	0	0	0	0	0	0	0	0	0	0	0	0	0	0	0	0	0	0	0	0	0	0	0	0	0	0	0	0	0	0	0	0	0	0	0	0	0	0	0	0	0
Zotu2101	0	0	0	0	0	0	0	0	0	0	0	0	0	0	0	0	0	0	0	0	0	0	0	0	0	0	0	0	0	0	0	0	0	0	0	0	0	0	0	0	0	0	0	0	0	0	0	0	0
Zotu2102	0	0	0	0	0	0	0	0	0	0	0	0	0	0	0	0	0	0	0	0	0	0	0	0	0	0	0	0	0	0	0	0	0	0	0	0	0	0	0	0	0	0	0	0	0	0	0	0	0
Zotu2103	0	0	0	0	0	0	0	0	0	0	0	0	0	0	0	0	0	0	0	0	0	0	0	0	0	0	0	0	0	0	0	0	0	0	0	0	0	0	0	0	0	0	0	0	0	0	0	0	0
Zotu2104	0	0	3	0	0	0	0	0	0	0	0	0	0	0	0	0	0	0	0	0	0	0	0	0	0	0	0	0	0	0	0	0	0	0	0	0	0	0	0	0	0	0	0	0	0	0	0	0	0
Zotu2105	0	0	0	0	0	0	0	0	0	0	0	0	0	0	0	0	0	0	0	0	0	0	0	0	0	0	0	0	0	0	0	0	0	0	0	0	0	0	0	0	0	0	0	0	0	0	0	0	0
Zotu2106	0	0	0	0	0	0	0	0	0	55	0	0	0	0	0	0	0	0	0	0	0	0	0	0	0	0	0	0	0	0	0	0	0	0	0	0	0	0	0	0	0	0	0	0	0	0	0	0	0
Zotu2107	0	0	0	0	0	0	0	0	0	0	0	0	0	0	0	0	0	0	0	0	0	0	0	0	0	0	0	0	0	0	0	0	0	0	0	0	0	0	0	0	0	0	0	0	0	0	0	0	0
Zotu2108	0	0	0	0	0	0	0	0	0	0	0	0	0	0	0	0	0	0	0	0	0	0	0	0	0	0	0	0	0	0	0	0	0	0	0	0	0	0	0	0	0	0	0	0	0	0	0	0	0
Zotu2109	0	0	0	0	0	0	0	0	0	0	0	0	0	0	0	0	0	0	0	0	0	0	2	0	0	0	0	0	0	0	0	0	0	0	0	0	0	0	0	0	0	0	0	0	0	0	0	0	0
Zotu211	0	0	0	0	0	0	0	0	0	1	0	0	0	0	0	0	86	0	0	0	0	0	0	0	0	0	28	0	0	0	1	0	347	0	0	0	0	0	0	0	0	1	0	1	0	2	0	1	0
Zotu2110	0	0	0	0	0	0	0	0	0	0	0	0	0	0	0	0	0	0	0	0	0	0	0	0	0	0	0	0	0	0	0	0	0	0	0	0	0	0	0	0	0	0	0	0	0	0	0	0	0
Zotu2111	0	0	0	0	0	0	0	0	0	0	0	0	0	0	0	0	0	0	0	0	0	0	0	0	0	0	0	3	0	0	0	0	0	0	0	0	0	0	0	0	0	0	0	0	0	0	0	0	0
Zotu2112	0	0	0	0	0	0	0	0	0	0	0	0	0	0	0	0	0	0	0	0	0	0	0	0	0	0	0	0	0	0	0	0	0	0	0	0	0	0	0	0	0	0	0	0	0	0	0	0	0
Zotu2113	0	0	0	0	0	0	0	0	0	0	0	0	0	0	0	0	0	0	0	0	0	0	0	0	0	0	0	0	0	0	0	0	0	0	0	0	0	0	0	0	0	0	0	0	0	0	0	0	0
Zotu2114	0	0	0	0	0	0	0	0	0	0	0	0	0	0	0	0	0	0	0	0	0	0	0	0	0	0	0	0	0	0	0	0	0	0	0	0	0	0	0	0	0	0	0	0	0	0	0	0	0
Zotu2115	0	0	0	0	0	0	0	0	0	0	0	0	0	0	0	0	0	0	0	0	0	0	0	0	0	0	0	0	0	0	0	0	0	0	0	0	0	0	0	0	0	0	0	0	0	0	0	0	0
Zotu2116	0	0	0	0	0	0	0	0	0	0	0	0	0	0	0	0	0	0	0	0	0	0	0	0	0	0	0	0	0	0	0	0	0	0	0	0	0	0	0	0	0	0	0	0	0	0	0	0	0
Zotu2117	0	0	0	0	0	0	0	0	0	0	0	0	0	0	0	0	0	0	0	0	0	0	0	0	0	0	0	0	0	0	0	0	0	0	0	0	0	0	0	0	0	0	0	0	0	0	0	0	0
Zotu2118	0	0	0	0	0	0	0	0	0	0	0	0	0	0	0	0	0	0	0	0	0	0	0	0	0	0	0	0	0	0	0	0	0	0	0	0	0	0	0	0	0	0	0	0	0	0	0	0	0
Zotu2119	0	0	0	0	0	0	0	0	0	0	0	0	0	0	0	0	0	0	0	0	0	0	0	0	0	0	0	0	21	0	0	0	0	0	0	0	0	0	0	0	0	0	0	0	0	0	0	0	0
Zotu212	0	0	0	0	0	0	0	0	0	0	0	0	0	0	0	0	0	0	0	0	0	0	57	0	0	0	0	0	0	0	0	0	0	0	0	0	1	0	0	0	0	0	0	0	0	0	0	0	0
Zotu2120	0	0	0	0	0	0	0	0	0	0	0	0	0	0	0	0	0	0	0	0	0	0	0	0	0	0	0	0	0	0	0	0	0	0	0	0	0	0	0	0	0	0	0	0	0	47	0	0	0
Zotu2121	0	0	0	0	0	0	0	0	0	0	0	0	0	0	0	0	0	0	0	0	0	0	0	0	0	0	0	0	0	0	0	0	0	0	0	0	0	0	0	0	0	0	0	0	0	0	0	0	0
Zotu2122	0	0	0	0	0	0	0	0	0	0	0	0	0	0	0	0	0	0	0	0	0	0	0	0	0	0	0	0	0	0	0	2	0	0	0	0	0	0	0	0	19	0	0	1	0	0	0	0	0
Zotu2123	0	0	0	0	0	0	0	0	0	0	0	0	0	0	0	0	0	0	0	0	0	0	0	0	0	0	0	0	16	0	1	0	0	0	0	0	0	0	0	0	0	0	0	0	0	0	0	0	0
Zotu2124	0	0	0	0	0	0	0	0	0	0	0	0	0	0	0	0	0	0	0	0	0	0	0	0	0	0	0	0	0	0	0	0	0	0	0	0	0	0	0	0	0	0	0	0	0	0	0	0	0
Zotu2125	0	0	0	0	0	0	0	0	0	0	0	0	0	0	0	0	0	0	0	0	0	0	0	0	0	0	0	0	0	0	0	0	0	0	0	0	0	0	0	0	0	0	0	0	0	0	0	0	0
Zotu2126	0	0	0	0	0	0	0	0	0	0	0	0	0	0	0	0	0	0	0	0	0	0	0	0	0	0	0	0	0	0	0	0	0	0	0	0	0	0	0	0	0	0	0	0	0	0	0	0	0
Zotu2127	0	0	0	0	0	0	0	0	0	0	0	0	0	0	0	0	0	0	0	0	0	0	0	0	0	0	0	0	0	0	0	0	0	0	0	0	0	0	0	0	0	0	0	0	0	0	0	0	0
Zotu2128	0	0	0	0	0	0	0	0	0	0	0	0	0	0	0	0	0	0	0	0	0	0	0	0	0	0	0	0	0	0	0	0	0	0	0	0	0	0	0	0	0	0	0	0	0	0	0	0	0
Zotu2129	0	0	0	0	0	0	0	0	0	0	0	0	0	0	0	0	0	0	0	0	0	0	0	0	0	0	0	0	0	0	0	0	0	0	0	0	0	0	0	0	0	0	0	0	0	0	0	0	0
Zotu213	0	1	0	0	177	0	0	0	0	0	0	0	0	0	1	0	0	0	0	0	2	0	0	0	0	0	0	0	0	0	0	0	0	0	0	0	0	0	0	0	0	0	0	0	0	0	0	0	0
Zotu2130	0	0	0	0	0	0	0	0	0	0	0	0	0	0	0	0	0	0	0	0	0	0	0	0	0	0	0	0	0	0	0	0	0	0	0	0	0	0	0	0	0	0	0	0	0	0	0	0	0
Zotu2131	0	0	0	0	0	0	0	0	0	0	0	0	0	0	0	0	0	0	0	0	0	0	0	0	0	0	0	0	0	0	0	0	0	0	0	0	0	0	0	0	0	0	0	0	0	0	0	0	0
Zotu2132	0	0	0	0	0	0	0	0	0	0	0	0	0	0	0	0	0	0	0	0	0	0	0	0	0	0	0	0	0	0	0	0	0	0	0	0	0	0	0	0	0	0	0	0	0	0	0	0	0
Zotu2133	0	0	0	0	0	0	0	0	0	0	0	0	0	0	0	0	0	0	0	0	0	0	0	0	0	0	0	0	0	0	0	0	0	0	0	0	0	0	0	0	0	0	0	0	0	0	0	0	0
Zotu2134	0	0	0	0	0	0	0	0	0	0	0	0	0	0	0	0	0	0	0	0	0	0	0	0	0	0	0	0	0	0	0	0	0	0	0	0	0	0	0	0	0	0	0	0	0	0	0	0	0
Zotu2135	0	0	0	0	0	0	0	0	0	0	0	0	0	0	0	0	0	0	0	0	0	0	0	0	0	0	0	0	0	0	0	0	0	0	0	0	0	0	0	0	0	0	0	0	0	0	0	0	0
Zotu2136	0	0	0	0	0	0	0	0	0	0	0	0	0	0	0	0	0	0	0	0	0	0	0	0	0	0	0	0	0	0	0	0	0	0	0	0	0	0	0	0	0	0	0	0	0	0	0	0	0
Zotu2137	0	0	0	0	0	0	0	0	0	0	0	0	0	0	0	0	0	0	0	0	0	0	0	0	0	0	0	0	0	0	0	0	0	0	0	0	0	0	0	0	0	0	0	0	0	0	0	0	0
Zotu2138	0	0	0	0	0	0	0	0	0	0	0	0	0	0	0	0	0	0	0	0	0	0	0	0	0	0	0	0	0	0	0	0	0	0	0	0	0	0	0	0	0	0	0	0	0	0	0	0	0
Zotu2139	0	0	0	0	0	0	0	0	0	0	0	0	0	0	0	0	0	0	0	0	0	0	0	0	0	0	0	0	0	0	0	0	0	0	0	0	0	0	0	0	0	0	0	0	0	0	0	0	0
Zotu214	0	0	0	1	0	1	0	0	0	0	0	0	0	0	0	0	0	1	0	1	0	0	0	0	0	1	0	0	0	0	0	0	0	0	6	0	0	1	2963	1	1	0	0	1541	0	1	0	0	0
Zotu2140	0	0	0	0	0	0	0	0	0	0	0	0	0	0	0	0	0	0	0	0	0	0	0	0	0	0	0	0	12	0	0	0	0	0	0	0	0	0	0	0	0	0	0	0	0	0	0	0	0
Zotu2141	0	0	0	0	0	0	0	0	0	0	0	0	0	0	0	0	0	0	0	0	0	0	0	0	0	0	0	0	0	0	0	0	0	0	0	0	0	0	0	0	0	0	0	0	0	0	0	0	0
Zotu2142	0	0	0	0	0	0	0	0	0	0	0	0	0	0	0	0	0	0	0	0	0	0	0	0	0	0	0	0	0	0	0	0	0	0	0	0	0	0	0	0	0	0	2	0	0	0	0	0	0
Zotu2143	0	0	0	0	0	0	0	0	0	0	0	0	0	0	0	0	0	0	0	0	0	0	0	0	0	0	0	0	0	0	0	0	0	0	0	0	0	0	0	0	0	0	0	0	0	0	0	0	0
Zotu2144	0	0	0	0	0	0	0	0	0	0	0	0	0	0	0	0	0	0	0	0	0	0	0	0	0	0	0	0	0	0	0	0	0	0	0	0	0	0	0	0	0	0	0	0	0	0	0	0	0
Zotu2145	0	0	0	0	0	0	0	0	0	0	0	0	0	0	0	0	0	0	0	0	0	0	0	0	0	0	0	0	0	0	0	0	0	0	0	0	0	0	0	0	0	0	0	0	0	0	0	0	0
Zotu2146	0	0	0	0	0	0	0	0	0	0	0	0	0	0	0	0	0	0	0	0	0	0	0	0	0	0	0	0	0	0	0	0	0	0	0	0	0	0	0	0	0	0	0	0	0	0	0	0	0
Zotu2147	0	0	0	0	0	0	0	0	0	0	0	0	0	0	0	0	0	0	0	0	0	0	0	0	0	0	0	0	0	0	0	0	0	0	0	0	0	0	0	0	0	0	0	0	0	0	0	0	0
Zotu2148	0	0	0	0	0	0	0	0	0	0	0	0	0	0	0	0	0	0	0	0	0	0	0	0	0	0	0	0	0	0	0	0	0	0	0	0	0	0	0	0	0	0	0	0	0	0	0	0	0
Zotu2149	0	0	0	0	0	0	0	0	0	67	0	0	0	0	0	0	0	0	0	0	0	0	0	0	0	0	0	0	0	0	0	0	0	0	0	0	0	0	0	0	0	0	0	0	0	0	0	0	0
Zotu215	0	0	0	0	0	0	0	0	0	259	0	1	0	0	0	0	0	5	0	0	1	0	0	0	0	0	0	0	0	0	0	0	1	0	0	0	0	0	0	0	1	0	0	0	0	0	0	0	0
Zotu2150	0	0	0	0	0	0	0	0	0	0	0	0	0	0	0	0	0	0	0	0	0	0	0	0	0	0	0	0	0	0	0	0	0	0	0	0	0	0	0	0	0	0	0	0	0	0	0	0	0
Zotu2151	0	0	0	0	0	0	0	0	0	0	0	0	0	0	0	0	0	0	0	0	0	0	54	0	0	0	0	0	0	0	0	0	0	0	0	0	0	0	0	0	0	0	0	0	0	0	0	0	0
Zotu2152	0	0	4	0	0	0	0	0	0	0	0	0	0	0	0	0	0	0	0	0	0	21	0	0	0	0	0	0	0	0	0	0	0	0	0	0	0	0	0	0	0	0	0	0	0	0	0	0	0
Zotu2153	0	0	0	0	0	0	0	0	0	0	0	0	0	0	0	0	0	0	0	0	0	0	0	0	0	0	0	0	0	0	0	0	0	0	0	0	0	0	0	0	0	0	0	0	0	0	0	0	0
Zotu2154	0	0	0	0	0	0	0	0	0	0	0	0	0	0	0	0	0	0	0	0	0	0	0	0	0	0	0	0	0	0	0	0	0	0	0	0	0	0	0	0	0	0	0	0	0	0	0	0	0
Zotu2155	0	0	0	0	0	0	0	0	0	0	0	0	0	0	0	0	0	0	0	0	0	0	0	0	0	0	0	0	0	0	0	0	0	0	0	0	0	0	0	0	0	0	0	0	0	0	0	0	0
Zotu2156	0	0	0	0	0	0	0	0	0	0	0	0	0	0	0	0	0	0	0	0	0	0	0	0	0	0	0	0	0	0	0	0	0	0	0	0	0	0	0	0	0	0	0	0	0	0	0	0	0
Zotu2157	0	0	0	0	0	0	0	0	0	0	0	0	0	0	0	0	0	0	0	0	0	0	0	0	0	0	0	0	0	0	0	0	0	0	0	0	0	0	0	0	0	0	0	0	0	0	0	0	0
Zotu2158	0	0	0	0	0	0	0	0	0	0	0	0	0	0	0	0	0	0	0	0	0	0	0	0	0	0	0	0	0	0	0	0	0	0	0	0	0	0	0	0	0	0	0	0	0	0	0	0	0
Zotu2159	0	0	0	0	0	0	0	0	0	0	0	0	0	0	0	0	0	0	0	0	0	0	0	0	0	0	0	0	0	0	0	0	0	0	0	0	0	0	0	0	0	0	0	0	0	0	0	0	0
Zotu216	0	0	0	0	0	0	0	0	0	0	0	0	0	0	1	0	0	17	0	0	0	0	0	0	0	1	0	0	0	0	0	0	0	0	0	0	0	0	0	0	0	0	0	0	0	0	0	0	0
Zotu2160	0	0	0	0	0	0	0	0	0	0	0	0	0	0	0	0	0	0	0	0	0	0	0	0	0	0	0	0	0	0	0	0	0	0	0	0	0	0	0	0	0	0	0	0	0	0	0	0	0
Zotu2161	0	0	0	0	0	0	0	0	0	0	0	0	0	0	0	0	0	0	0	0	0	0	0	0	0	0	0	0	0	0	0	0	0	0	0	0	0	0	0	0	0	0	0	0	0	0	0	0	0
Zotu2162	0	0	0	0	0	0	0	0	0	0	0	0	0	0	0	0	0	0	0	0	0	0	0	0	0	0	0	0	0	0	0	0	0	0	0	0	0	0	0	0	0	0	0	0	0	0	0	0	0
Zotu2163	0	0	0	0	0	0	0	0	0	0	0	0	0	0	0	0	0	0	0	0	0	0	0	0	0	0	0	0	0	0	0	0	0	0	0	0	0	0	0	0	0	0	0	0	0	0	0	0	0
Zotu2164	0	0	0	0	0	0	0	0	0	0	0	0	0	0	0	0	0	0	0	0	0	0	0	0	0	0	0	0	0	0	0	0	0	0	0	0	0	0	0	0	0	0	0	0	0	0	0	0	0
Zotu2165	0	0	0	0	0	0	0	0	0	0	0	0	0	0	0	0	0	0	0	0	0	0	0	0	0	0	0	0	0	0	0	0	0	0	0	0	0	0	0	0	0	0	0	0	0	0	0	0	0
Zotu2166	0	0	0	0	0	0	0	0	0	0	0	0	0	0	0	0	0	0	0	0	0	0	0	0	0	0	0	0	0	0	0	0	0	0	0	0	0	0	0	0	0	0	0	0	0	0	0	0	0
Zotu2167	0	0	0	0	0	0	0	0	0	0	0	0	0	0	0	0	0	0	0	0	0	0	0	0	0	0	0	0	0	0	0	0	0	0	0	0	0	0	0	0	0	0	0	0	0	0	0	0	0
Zotu2168	0	0	0	0	0	0	0	0	0	0	0	0	0	0	0	0	0	0	0	0	0	0	0	0	0	0	0	0	0	0	0	0	0	0	0	0	0	0	0	0	0	0	0	0	0	0	0	0	0
Zotu2169	0	0	0	0	0	0	0	0	0	0	0	0	0	0	0	0	0	0	0	0	0	0	0	0	0	0	0	0	0	0	0	0	0	0	0	0	0	0	0	0	0	0	0	0	0	2	0	0	0
Zotu217	0	0	0	0	0	0	0	0	0	0	0	0	0	0	0	0	0	0	0	0	0	0	0	0	0	0	0	0	0	0	0	0	0	0	0	0	0	0	0	0	0	0	0	0	0	0	0	0	0
Zotu2170	0	0	0	0	0	0	0	0	0	0	0	0	0	0	0	0	0	0	0	0	0	0	0	0	0	0	0	0	0	0	0	0	0	0	0	0	0	0	0	0	0	0	0	0	0	0	0	0	0
Zotu2171	0	0	0	0	0	0	0	0	0	0	0	0	0	0	0	0	0	0	0	0	0	0	0	0	0	0	0	0	0	0	0	0	0	0	0	0	0	0	0	0	0	0	0	0	0	0	0	0	0
Zotu2172	0	0	0	0	0	0	0	0	0	0	0	0	0	0	0	0	0	0	0	0	0	0	0	0	0	0	0	0	0	0	0	0	0	0	0	0	0	0	0	0	0	0	0	0	0	0	0	0	0
Zotu2173	0	0	0	0	0	0	0	0	0	0	0	0	0	0	0	0	0	0	0	0	0	0	0	0	0	0	0	0	0	0	0	0	0	0	0	0	0	0	0	0	0	0	0	0	0	0	0	0	0
Zotu2174	0	0	0	0	0	0	0	0	0	0	0	0	0	0	0	0	0	0	1	0	0	0	0	0	0	0	0	0	0	0	0	0	0	0	0	0	0	0	0	0	0	0	0	0	0	0	0	0	0
Zotu2175	0	0	0	0	0	0	0	0	0	0	0	0	0	0	0	0	0	0	0	0	0	0	0	0	0	0	0	0	0	0	0	0	0	0	0	0	0	0	0	0	0	0	0	0	0	0	0	0	0
Zotu2176	0	0	0	0	0	0	0	0	0	0	0	0	0	0	0	0	0	0	0	0	0	0	0	0	0	0	0	0	0	0	0	0	0	0	0	0	0	0	0	0	0	0	0	0	0	0	0	0	0
Zotu2177	0	0	0	0	0	0	0	0	0	0	0	0	0	0	0	0	0	0	0	0	0	0	0	0	0	0	0	0	6	0	0	0	0	0	0	0	0	0	0	0	0	0	0	0	0	0	0	0	0
Zotu2178	0	0	0	0	0	0	0	0	0	0	0	0	0	0	0	0	0	0	0	0	0	0	0	0	0	0	0	0	0	0	0	0	0	0	0	0	0	0	0	0	0	0	0	0	0	0	0	0	0
Zotu2179	0	0	0	0	0	0	0	0	0	0	0	0	0	0	0	0	0	0	0	0	0	0	0	0	0	0	0	0	0	0	0	0	0	0	0	0	0	0	0	0	0	0	0	0	0	0	0	0	0
Zotu218	0	0	0	0	0	0	0	0	0	0	0	0	0	1	0	0	0	0	0	0	0	0	0	0	1	0	0	0	0	0	0	0	0	0	0	2	0	1	0	0	0	0	0	1	0	3	0	4	0
Zotu2180	0	0	0	0	0	0	0	0	0	0	0	0	0	0	0	0	0	0	0	0	0	0	0	0	0	0	0	0	0	0	0	0	0	0	0	0	0	0	0	0	0	0	0	0	0	0	0	0	0
Zotu2181	0	0	0	0	0	0	0	0	0	0	0	0	0	0	0	0	0	0	0	0	0	0	0	0	0	0	0	0	0	0	0	0	0	0	0	0	0	0	0	0	0	0	0	0	0	0	0	0	0
Zotu2182	0	0	0	0	0	0	0	0	0	0	0	0	0	0	0	0	0	0	0	0	0	0	0	0	0	0	0	0	0	0	0	0	0	0	0	0	0	0	0	0	0	0	0	0	0	0	0	0	0
Zotu2183	0	0	0	0	0	0	0	0	0	0	0	0	0	0	0	0	0	0	0	0	0	0	0	0	0	0	0	0	0	0	0	0	0	0	0	0	0	0	0	0	0	0	0	0	0	0	0	0	0
Zotu2184	0	0	0	0	0	0	0	0	0	0	0	0	0	0	0	0	0	0	0	0	0	0	0	0	0	0	0	0	0	0	0	0	0	0	0	0	0	0	0	0	0	0	0	0	0	0	0	0	0
Zotu2185	0	0	0	0	0	0	0	0	0	0	0	0	0	0	0	0	0	0	0	0	0	0	0	0	0	0	0	0	0	0	0	0	0	0	0	0	0	0	0	0	0	0	0	0	0	0	0	0	0
Zotu2186	0	0	0	0	0	0	0	0	0	0	0	0	0	0	0	0	0	0	0	0	0	0	0	0	0	0	0	0	0	0	0	0	0	0	0	0	0	0	0	0	0	0	0	0	0	0	0	0	0
Zotu2187	0	0	0	0	0	0	0	0	0	0	0	0	0	0	0	0	0	0	0	0	0	0	0	0	0	0	0	0	0	0	0	0	0	0	0	0	0	0	0	0	0	0	0	0	0	0	0	0	0
Zotu2188	0	0	0	0	0	0	0	0	0	0	0	0	0	0	0	0	0	0	0	0	0	0	0	0	0	0	0	0	0	0	0	0	0	0	0	0	0	0	0	0	0	0	0	0	0	0	0	0	0
Zotu2189	0	0	0	0	0	0	0	0	0	0	0	0	0	0	0	0	0	0	0	0	0	0	0	0	0	0	0	0	0	0	0	0	0	0	0	0	0	0	0	0	0	0	0	0	0	0	0	0	0
Zotu219	0	0	0	0	0	0	0	0	0	0	0	1	0	0	0	0	0	0	0	0	2	0	6422	0	0	0	1	1	32	0	2	1	1	0	0	0	0	2	0	0	0	0	0	0	0	0	0	0	0
Zotu2190	0	0	0	0	0	0	0	0	0	0	0	0	0	0	0	0	0	0	0	0	0	0	0	0	0	0	0	0	0	0	0	0	0	0	0	0	0	0	0	0	0	0	0	0	0	0	0	0	0
Zotu2191	0	0	0	0	0	0	0	0	0	0	0	0	0	0	0	0	0	0	0	0	0	0	0	0	0	0	0	0	0	0	0	0	0	0	0	0	0	0	0	0	0	0	0	0	0	0	0	0	0
Zotu2192	0	0	0	0	0	0	0	0	0	0	0	0	0	0	0	0	0	0	0	0	0	0	0	0	0	0	0	0	0	0	0	0	1	0	0	0	0	0	0	0	0	0	0	0	0	0	0	0	0
Zotu2193	0	0	0	0	0	0	0	0	0	1	0	0	0	0	0	0	0	0	0	0	0	0	0	0	0	0	0	0	0	0	0	0	2	0	0	0	0	0	0	0	0	0	0	0	0	0	0	0	0
Zotu2194	0	0	0	0	0	0	0	0	0	0	0	0	0	0	0	0	0	0	0	0	0	0	0	0	0	0	0	0	7	0	0	0	0	0	0	0	0	0	0	0	0	0	0	0	0	0	0	0	0
Zotu2195	0	0	0	0	0	0	0	0	0	0	0	0	0	0	0	0	0	0	0	0	0	0	0	0	0	0	0	0	0	0	0	0	0	0	0	0	0	0	0	0	0	0	0	0	0	0	0	0	0
Zotu2196	0	0	0	0	0	0	0	0	0	0	0	0	0	0	0	0	0	0	0	0	0	0	0	0	0	0	0	0	0	0	0	0	0	0	0	0	0	0	0	0	0	0	0	0	0	0	0	0	0
Zotu2197	0	0	0	0	0	0	0	0	0	0	0	0	0	0	0	0	0	0	0	0	0	0	0	0	0	0	0	0	0	0	0	0	0	0	0	0	0	0	0	0	0	0	0	0	0	0	0	0	0
Zotu2198	0	0	0	0	0	0	0	0	0	3	0	3	0	0	0	0	0	1	0	0	0	0	0	0	0	0	0	0	0	0	0	0	0	0	0	0	0	0	0	0	6	0	0	0	0	0	0	0	0
Zotu2199	0	0	0	0	0	0	0	0	0	0	0	0	0	0	0	0	0	0	0	0	0	0	0	0	0	0	0	0	0	0	0	0	0	0	0	0	0	0	0	0	0	0	0	0	0	0	0	0	0
Zotu22	3	0	0	0	7	0	0	0	0	0	0	1099	1	0	0	1	0	54	0	0	0	4	1	0	0	0	3	2	4	0	1	0	3	0	3	0	0	0	0	0	0	0	0	0	0	0	0	0	0
Zotu220	0	0	0	1	0	0	0	0	0	0	0	0	0	0	0	0	0	1	0	0	0	0	0	0	0	0	0	0	0	0	0	0	0	0	0	0	0	0	0	0	0	0	0	0	0	0	0	0	0
Zotu2200	0	0	0	0	0	0	0	0	0	0	0	0	0	0	0	0	0	0	0	0	0	0	0	0	0	0	0	0	0	0	0	0	0	0	0	0	0	0	0	0	0	0	0	0	0	0	0	0	0
Zotu2201	0	0	0	0	0	0	0	0	0	0	0	0	0	0	0	0	0	0	0	0	0	0	0	0	0	0	0	0	0	0	0	0	0	0	0	0	0	0	0	0	0	0	0	0	0	0	0	0	0
Zotu2202	0	0	0	0	0	0	0	0	0	0	0	0	0	0	0	0	0	0	0	0	0	0	0	0	0	0	0	0	0	0	0	0	0	0	0	0	0	0	0	0	0	0	0	0	0	0	0	0	0
Zotu2203	0	0	0	0	0	0	0	0	0	0	0	0	0	0	0	0	0	0	0	0	0	0	0	0	0	0	0	0	0	0	0	0	0	0	0	0	0	0	0	0	0	0	0	0	0	0	0	0	0
Zotu2204	0	0	0	0	0	0	0	0	0	2	0	2	0	0	0	0	0	0	0	0	0	0	4	0	0	0	3	17	0	0	0	0	0	0	0	0	0	0	0	0	0	0	0	0	0	1	0	0	0
Zotu2205	0	0	0	0	0	0	0	0	0	0	0	0	0	0	0	0	0	0	0	0	25	0	1	0	0	0	0	0	0	0	0	0	0	0	0	0	0	9	0	0	0	0	0	0	0	1	0	0	0
Zotu2206	0	0	0	0	0	0	0	0	0	0	0	0	0	0	0	0	0	0	0	0	0	0	0	0	0	0	0	0	0	0	0	0	0	0	0	0	0	0	0	0	0	0	0	0	0	0	0	0	0
Zotu2207	0	0	0	0	0	0	0	0	0	0	0	0	0	0	0	0	0	0	0	0	0	0	0	0	0	0	0	0	0	0	0	0	0	0	0	0	0	0	0	0	0	0	0	0	0	0	0	0	0
Zotu2208	0	0	0	0	0	0	0	0	0	0	0	0	0	0	0	0	0	0	0	0	0	0	0	0	0	0	0	0	0	0	0	0	0	0	0	0	0	0	0	0	0	0	0	0	0	0	0	0	0
Zotu2209	0	0	0	0	0	0	0	0	0	0	0	0	0	0	0	0	0	0	0	0	0	0	0	0	0	0	0	0	0	0	0	0	0	0	0	0	0	0	0	0	0	0	0	0	0	0	0	0	0
Zotu221	0	1	0	0	0	0	0	0	0	0	0	0	0	0	0	0	1	0	0	0	0	0	0	0	0	0	0	0	0	0	0	0	0	0	0	0	0	0	0	0	0	0	0	0	0	0	0	0	0
Zotu2210	0	0	0	0	0	0	0	0	0	0	0	0	0	0	0	0	0	0	0	0	0	0	0	0	0	0	0	0	0	0	0	0	0	0	0	0	0	0	0	0	0	0	0	0	0	0	0	0	0
Zotu2211	0	0	0	0	0	0	0	0	0	0	0	0	0	0	0	0	0	0	0	0	0	0	0	0	0	0	0	0	0	0	0	0	0	0	0	0	0	0	0	0	0	0	0	0	0	0	0	0	0
Zotu2212	0	0	0	0	0	0	0	0	0	0	0	0	0	0	0	0	0	0	0	0	0	0	0	0	0	0	0	0	0	0	0	0	0	0	0	0	0	0	0	0	0	0	0	0	0	0	0	0	0
Zotu2213	0	0	0	0	0	0	0	0	0	0	0	0	0	0	0	0	0	0	0	0	0	0	0	0	0	0	0	0	0	0	0	0	0	0	0	0	0	0	0	0	0	0	0	0	0	0	0	0	0
Zotu2214	0	0	0	0	0	0	0	0	0	0	0	0	0	0	0	0	0	0	0	0	0	0	0	0	0	0	0	0	0	0	0	0	0	0	0	0	0	0	0	0	0	0	0	0	0	0	0	0	0
Zotu2215	0	0	0	0	0	0	0	0	0	0	0	0	0	0	0	0	0	0	0	0	0	0	0	0	0	0	0	0	0	0	0	0	0	0	0	0	0	0	0	0	0	0	0	0	0	0	0	0	0
Zotu2216	0	0	0	0	0	0	0	0	0	0	0	0	0	0	0	0	0	0	0	0	0	0	0	0	0	0	0	0	0	0	0	0	0	0	0	0	0	0	0	0	0	0	0	0	0	0	0	0	0
Zotu2217	0	0	0	0	0	0	0	0	0	0	0	0	0	0	0	0	0	0	0	0	0	0	0	0	0	0	0	0	0	0	0	0	0	0	0	0	0	0	0	0	0	0	0	0	0	0	0	0	0
Zotu2218	0	0	0	0	0	0	0	0	0	0	0	0	0	0	0	0	0	0	0	0	0	0	0	0	0	0	0	0	0	0	0	0	0	0	0	0	0	0	0	0	0	0	0	0	0	0	0	0	0
Zotu2219	0	0	0	0	0	0	0	0	0	0	0	0	0	0	0	0	0	0	0	0	0	0	0	0	0	0	0	0	0	0	0	0	0	0	0	0	0	0	0	0	0	0	0	0	0	0	0	0	0
Zotu222	0	0	0	0	0	0	0	0	0	0	0	0	0	0	0	0	0	0	0	0	0	0	0	0	0	0	0	0	12	0	0	0	0	0	0	0	0	0	0	0	0	0	0	0	0	0	0	0	0
Zotu2220	0	0	0	0	0	0	0	0	0	0	0	0	0	0	0	0	0	0	0	0	0	0	0	0	0	0	0	0	0	0	0	0	0	0	0	0	0	0	0	0	0	0	0	0	0	0	0	0	0
Zotu2221	0	0	0	0	0	0	0	0	0	0	0	0	0	0	0	0	0	0	0	0	0	0	0	0	0	0	0	58	0	0	0	0	0	0	0	0	0	0	0	0	0	0	0	0	0	0	0	0	0
Zotu2222	0	0	0	0	0	0	0	0	0	0	0	0	0	0	0	0	0	1	0	0	0	0	0	0	0	0	0	0	0	0	0	0	5	0	0	0	0	0	0	0	0	0	0	0	0	0	0	0	0
Zotu2223	0	0	0	0	0	0	0	0	0	0	0	0	0	0	0	0	0	0	0	0	0	0	0	0	0	0	0	37	0	0	0	0	0	0	0	0	0	0	0	0	0	0	0	0	0	0	0	0	0
Zotu2224	0	0	0	0	0	0	0	0	0	0	0	0	0	0	0	0	0	0	0	0	0	0	0	0	0	0	0	0	0	0	0	0	0	0	0	0	0	0	0	0	0	0	0	0	0	0	0	0	0
Zotu2225	0	0	0	0	0	0	0	0	0	0	0	0	1	0	0	0	0	0	0	0	0	0	0	0	0	0	0	0	0	0	1	0	0	0	0	0	0	0	0	0	0	0	0	0	0	0	0	0	0
Zotu2226	0	0	0	0	0	0	0	0	0	0	0	0	0	0	0	0	0	0	0	0	0	0	0	0	0	0	0	0	0	0	0	0	0	0	0	0	0	0	0	0	0	0	0	0	0	0	0	0	0
Zotu2227	0	0	0	0	0	0	0	0	0	0	0	0	0	0	0	0	0	0	0	0	0	0	0	0	0	0	0	0	0	0	0	0	0	0	0	0	0	0	0	0	0	0	0	0	0	0	0	0	0
Zotu2228	0	0	0	0	0	0	0	0	0	0	0	0	0	0	0	0	0	0	0	0	0	0	0	0	0	0	0	0	0	0	0	0	0	0	0	0	0	0	0	0	0	0	0	0	0	0	0	0	0
Zotu2229	0	0	0	0	0	0	0	0	0	0	0	0	0	0	0	0	0	0	0	0	0	0	0	0	0	0	0	0	0	0	0	0	0	0	0	0	0	0	0	0	0	0	0	0	0	0	0	0	0
Zotu223	0	0	0	0	0	0	0	0	0	0	0	0	0	0	0	0	1	0	0	0	0	0	0	0	0	0	0	51	0	0	2	0	0	0	0	0	0	0	0	0	0	0	0	0	0	0	0	0	0
Zotu2230	0	0	0	0	0	0	0	0	0	0	0	0	0	0	0	0	0	0	0	0	0	0	0	0	0	0	0	0	0	0	0	0	0	0	0	0	0	0	0	0	0	0	0	0	0	0	0	0	0
Zotu2231	0	0	0	0	0	0	0	0	0	0	0	0	0	0	0	0	0	0	0	0	0	0	0	0	0	0	0	0	0	0	0	0	0	0	0	0	0	0	0	0	0	0	0	0	0	0	0	0	0
Zotu2232	0	0	0	0	0	0	0	0	0	0	0	0	0	0	0	0	0	0	0	0	0	0	0	0	0	0	0	0	0	0	0	0	0	0	0	0	0	0	0	0	0	0	0	0	0	0	0	0	0
Zotu2233	0	0	0	0	0	0	0	0	0	0	0	0	0	0	0	0	0	0	0	0	0	0	0	0	0	0	0	0	0	0	0	0	0	0	0	0	0	0	0	0	0	0	0	0	0	0	0	0	0
Zotu2234	0	0	0	0	0	0	0	0	0	0	0	0	0	0	0	0	0	0	0	0	0	0	0	0	0	0	0	0	0	0	0	0	0	0	0	0	0	0	0	0	0	0	0	0	0	0	0	0	0
Zotu2235	0	0	0	0	0	0	0	0	0	0	0	0	0	0	0	0	0	0	0	0	0	0	0	0	0	0	0	0	0	0	0	0	0	0	0	0	0	0	0	0	0	0	0	0	0	0	0	0	0
Zotu2236	0	0	0	0	0	0	0	0	0	0	0	0	0	0	0	0	0	0	0	0	0	0	0	0	0	0	0	0	0	0	0	0	0	0	0	0	0	0	0	0	0	0	0	0	0	0	0	0	0
Zotu2237	0	0	0	0	0	0	0	0	0	0	0	0	0	0	0	0	0	0	0	0	0	0	0	0	0	0	0	0	0	0	0	0	0	0	0	0	0	0	0	0	0	0	0	0	0	0	0	0	0
Zotu2238	0	0	0	0	0	0	0	0	0	0	0	0	0	0	0	0	0	0	0	0	0	0	0	0	0	0	0	0	0	0	0	0	0	0	0	0	0	0	0	0	0	0	0	0	0	0	0	0	0
Zotu2239	0	0	0	0	0	0	0	0	0	0	0	0	0	0	0	0	0	0	0	0	0	0	0	0	0	0	0	0	0	0	0	0	0	0	0	0	0	0	0	0	0	0	0	0	0	0	0	0	0
Zotu224	0	0	0	0	0	0	0	0	0	0	0	0	0	0	0	0	0	0	0	0	0	0	0	0	0	0	0	0	0	0	0	0	0	0	0	0	0	0	0	0	0	0	0	703	0	0	0	0	0
Zotu2240	0	0	0	0	1	0	0	0	0	0	0	0	0	0	0	0	0	0	0	0	0	0	4	0	0	0	0	0	0	0	0	0	0	0	0	0	0	1	0	0	0	0	0	0	0	0	0	0	0
Zotu2241	0	0	0	0	1	0	0	0	0	0	0	0	1	0	0	0	0	0	0	0	0	0	0	0	0	0	0	0	0	0	0	0	0	0	0	0	0	0	0	0	0	6	0	0	0	0	0	0	2
Zotu2242	0	0	0	0	0	0	0	0	0	0	0	0	0	0	0	0	0	0	0	0	0	0	0	0	0	0	0	0	0	0	0	0	0	0	0	0	0	0	0	0	0	0	0	0	0	0	0	0	0
Zotu2243	0	0	0	0	0	0	0	0	0	0	0	0	0	0	0	0	0	0	0	0	0	0	0	0	0	0	0	0	0	0	0	0	0	0	0	0	0	0	0	0	0	0	0	0	0	0	0	0	0
Zotu2244	0	0	0	0	0	0	0	0	0	0	0	0	0	0	0	0	12	0	0	0	0	0	0	0	0	0	0	0	0	0	0	0	14	0	0	0	0	0	0	0	0	0	0	0	0	0	0	1	0
Zotu2245	0	0	0	0	0	0	0	0	0	0	0	0	0	0	0	0	0	0	0	0	0	0	0	0	0	0	0	0	0	0	0	0	0	0	0	0	0	0	0	0	0	0	0	0	0	0	0	0	0
Zotu2246	0	0	0	0	0	0	0	0	0	0	0	0	0	0	0	0	0	0	0	0	0	0	0	0	0	0	42	0	0	0	0	0	0	0	0	0	0	0	0	0	0	0	0	0	0	0	0	0	0
Zotu2247	0	0	0	0	0	0	0	0	0	0	0	1	0	0	0	0	0	0	0	0	0	0	0	0	0	0	0	0	0	0	0	0	0	0	0	0	0	22	0	0	0	0	0	9	0	0	0	0	0
Zotu2248	0	0	0	0	0	0	0	0	0	0	0	0	0	0	0	0	0	0	0	0	0	0	0	0	0	0	0	0	0	0	0	0	0	0	0	0	0	0	0	0	0	0	0	0	0	33	0	0	0
Zotu2249	0	0	0	0	0	0	0	0	0	0	0	0	0	0	0	0	0	0	0	0	0	0	0	0	0	0	0	0	0	0	0	0	0	0	0	0	0	0	0	0	0	0	0	0	0	0	0	0	0
Zotu225	2	0	0	1	0	0	0	0	0	0	0	0	0	0	0	0	0	0	0	0	0	0	0	1	0	0	0	0	0	0	0	0	0	0	0	0	0	0	0	0	0	0	0	0	0	0	0	0	0
Zotu2250	0	0	0	0	0	0	0	0	0	0	0	0	0	0	0	0	0	0	0	0	0	0	0	0	0	0	0	0	0	0	0	0	0	0	0	0	0	0	0	0	0	0	0	0	0	0	0	0	0
Zotu2251	0	0	0	0	0	0	0	0	0	0	0	0	0	0	0	0	0	0	0	0	0	0	0	0	0	0	0	0	0	0	0	0	0	0	0	0	0	0	0	0	0	0	0	0	0	0	0	0	0
Zotu2252	0	0	0	0	0	0	0	0	0	0	0	0	0	0	0	0	0	0	0	0	0	0	0	0	0	0	0	0	0	0	0	0	0	0	0	0	0	0	0	0	0	0	0	0	0	0	0	0	0
Zotu2253	0	0	0	0	0	0	0	0	0	0	0	0	0	0	0	0	0	0	0	0	0	0	0	0	0	0	0	0	0	0	0	0	0	0	0	0	0	0	0	0	0	0	0	0	0	0	0	0	0
Zotu2254	0	0	0	0	0	0	0	0	0	0	0	0	0	0	0	0	0	0	0	0	0	0	0	0	0	0	0	0	0	0	0	0	0	0	0	0	0	0	0	0	0	0	0	0	0	0	0	0	0
Zotu2255	0	0	0	0	0	0	0	0	0	0	0	0	0	1	0	0	0	0	0	0	0	0	0	0	0	0	0	0	0	0	0	0	0	0	0	0	0	0	0	0	0	0	0	0	0	0	0	0	0
Zotu2256	0	0	0	0	0	0	0	0	0	0	0	0	0	0	0	0	0	0	0	0	0	0	0	0	0	0	0	0	0	0	0	0	0	0	0	0	0	0	0	0	0	0	0	0	0	0	0	0	0
Zotu2257	0	0	0	0	0	0	0	0	0	0	0	0	0	0	0	0	0	0	0	0	0	0	0	0	0	0	0	1	0	0	0	0	0	0	0	0	0	0	0	0	0	0	0	0	0	0	0	0	0
Zotu2258	0	0	0	0	0	0	0	0	0	0	0	0	0	0	0	0	0	0	0	0	0	0	0	0	0	0	0	0	0	0	0	0	0	0	0	0	0	0	0	0	0	0	0	0	0	0	0	0	0
Zotu2259	0	0	0	0	0	0	0	0	0	0	0	0	0	0	0	0	0	0	0	0	0	0	0	0	0	0	0	0	0	0	0	0	0	0	0	0	0	0	0	0	0	0	0	0	0	0	0	0	0
Zotu226	0	0	0	781	0	0	0	0	0	0	0	0	0	1	0	0	0	0	0	0	0	0	0	0	0	0	0	0	126	0	0	0	0	0	1	0	0	0	0	0	1	0	0	0	0	0	0	0	0
Zotu2260	0	0	0	0	0	0	0	0	0	0	0	0	0	0	0	0	0	0	0	0	0	0	0	0	0	0	0	0	0	0	0	0	0	0	0	0	0	0	0	0	0	0	0	0	0	0	0	0	0
Zotu2261	0	0	0	0	0	0	0	0	0	0	0	0	0	0	0	0	0	0	0	0	0	0	0	0	0	0	0	0	0	0	0	0	0	0	0	0	0	0	0	0	0	0	0	0	0	0	0	0	0
Zotu2262	0	0	0	0	0	0	0	0	0	0	0	0	0	0	0	0	0	0	0	0	0	0	0	0	0	0	0	0	0	0	0	0	0	0	0	0	0	0	0	0	0	0	0	0	0	0	0	0	0
Zotu2263	0	0	0	0	0	0	0	0	0	0	0	0	0	0	0	0	0	0	0	0	0	0	0	0	0	0	0	0	0	0	0	0	0	0	0	0	0	0	0	0	0	0	0	0	0	0	0	0	0
Zotu2264	0	0	0	0	0	0	0	0	0	0	0	0	0	0	0	0	0	0	0	0	0	0	0	0	0	0	0	0	0	0	0	0	0	0	0	0	0	0	0	0	0	0	0	0	0	0	0	0	0
Zotu2265	0	0	0	0	0	0	0	0	0	0	0	0	0	0	0	0	0	0	0	0	0	0	0	0	0	0	0	0	0	0	0	0	0	0	0	0	0	0	0	0	0	0	0	0	0	0	0	0	0
Zotu2266	0	0	0	0	0	0	0	0	0	0	0	0	0	0	0	0	0	0	0	0	0	0	0	0	0	0	0	0	0	0	0	0	0	0	0	0	0	0	0	0	0	0	0	0	0	0	0	0	0
Zotu2267	0	0	0	0	0	0	0	0	0	0	0	0	0	0	0	0	0	0	0	0	0	0	0	0	0	0	0	0	0	0	0	0	0	0	0	0	0	0	0	0	0	0	0	0	0	0	0	0	0
Zotu2268	0	0	0	0	0	0	0	0	0	0	0	0	0	0	0	0	0	0	0	0	0	0	0	0	0	0	0	0	0	0	0	0	0	0	0	0	0	0	0	0	0	0	0	0	0	0	0	0	0
Zotu2269	0	0	0	0	0	0	0	0	0	0	0	0	0	0	0	0	0	0	0	0	0	0	0	0	0	0	0	0	0	0	0	0	0	0	0	0	0	0	0	0	0	0	0	0	0	0	0	0	0
Zotu227	0	0	0	2	0	0	0	0	0	0	0	0	0	0	0	0	0	0	0	0	1	0	3	0	0	1	2	1	0	0	0	1	0	0	0	0	1	0	0	0	0	0	0	0	0	0	0	0	0
Zotu2270	0	0	0	0	0	0	0	0	0	0	0	0	0	0	0	0	0	0	0	0	0	0	0	0	0	0	0	0	0	0	0	0	0	0	0	0	0	0	0	0	0	0	0	0	0	0	0	0	0
Zotu2271	0	0	0	0	0	0	0	0	0	0	0	0	0	0	0	0	0	0	0	0	0	0	0	0	0	0	0	0	0	0	0	0	0	0	0	0	0	0	0	0	0	0	0	0	0	0	0	0	0
Zotu2272	0	0	0	0	0	0	0	0	0	0	0	0	0	0	0	0	0	0	0	0	0	0	0	0	0	0	0	0	0	0	0	0	0	0	0	0	0	0	0	0	0	0	0	0	0	0	0	0	0
Zotu2273	0	0	0	0	0	0	0	0	0	0	0	0	0	0	0	0	0	0	0	0	0	0	0	0	0	0	0	0	0	0	0	0	0	0	0	0	0	0	0	0	0	0	0	0	0	0	0	0	0
Zotu2274	0	0	0	0	0	0	0	0	0	0	0	0	0	0	0	0	0	0	0	0	0	0	0	0	0	0	0	0	0	0	0	0	0	0	0	0	0	0	0	0	0	0	0	0	0	0	0	0	0
Zotu2275	0	0	0	0	0	0	0	0	0	0	0	0	0	0	0	0	0	0	0	0	0	0	0	0	0	0	0	0	0	0	0	0	0	0	0	0	0	0	0	0	0	0	0	0	0	0	0	0	0
Zotu2276	0	0	0	0	0	0	0	0	0	0	0	0	0	0	0	0	0	0	0	0	0	0	0	0	0	0	0	0	0	0	0	0	0	0	0	0	0	0	0	0	0	0	0	0	0	0	0	0	0
Zotu2277	0	0	0	0	0	0	0	0	0	0	0	0	0	0	0	0	0	0	0	0	0	0	0	0	0	0	0	0	0	0	0	0	0	0	0	0	0	0	0	0	0	0	0	0	0	0	0	0	0
Zotu2278	0	0	0	0	0	0	0	0	0	0	0	0	0	0	0	0	0	0	0	0	0	0	0	0	0	0	0	0	0	0	0	0	0	0	0	0	0	0	0	0	0	0	0	0	0	0	0	0	0
Zotu2279	0	0	0	0	0	0	0	0	0	0	0	0	0	0	0	0	0	0	0	0	0	0	0	0	0	0	0	0	0	0	0	0	0	0	0	0	0	0	0	0	0	0	0	0	0	0	0	0	0
Zotu228	1	0	1	1	0	0	0	0	0	0	0	0	0	0	0	0	0	0	0	0	0	0	0	0	0	0	0	0	0	1	0	0	0	0	0	0	0	0	0	0	1	0	0	0	0	0	0	0	0
Zotu2280	0	0	0	0	0	0	0	0	0	0	0	0	0	0	0	0	0	0	0	0	0	0	0	0	0	0	0	0	0	0	0	0	0	0	0	0	0	0	0	0	0	0	0	0	0	0	0	0	0
Zotu2281	0	0	0	0	0	0	0	0	0	0	0	0	0	0	0	0	0	0	0	0	0	0	0	0	0	0	0	0	0	0	0	0	0	0	0	0	0	0	0	0	0	0	0	0	0	0	0	0	0
Zotu2282	0	0	0	0	0	0	0	0	0	1	0	0	0	0	0	0	0	0	0	0	0	0	0	0	0	0	0	0	0	0	0	0	1	0	0	0	0	0	0	0	0	0	0	0	0	0	0	0	0
Zotu2283	0	0	0	0	0	0	0	0	0	0	0	0	0	0	0	0	0	0	0	0	0	0	0	0	0	0	0	0	0	0	0	0	0	0	0	0	0	0	0	0	0	0	0	0	0	0	0	0	0
Zotu2284	0	0	0	0	0	0	0	0	0	0	0	0	0	0	0	0	0	0	0	0	0	0	0	0	0	0	0	0	0	0	0	0	0	0	0	0	0	0	0	0	0	0	0	0	0	0	0	0	0
Zotu2285	0	0	0	0	0	0	0	0	0	0	0	0	0	0	0	0	0	0	0	0	0	0	0	0	0	0	0	0	0	0	0	0	0	0	0	0	0	0	0	0	0	0	0	0	0	0	0	0	0
Zotu2286	0	0	0	0	0	0	0	0	0	0	0	0	0	0	0	0	0	0	0	0	0	0	0	0	0	0	0	0	0	0	0	0	0	0	0	0	0	0	0	0	0	0	0	0	0	0	0	0	0
Zotu2287	0	0	0	0	0	0	0	0	0	0	0	0	0	0	0	0	0	0	0	0	0	0	0	0	0	0	0	0	0	0	0	0	0	0	0	0	0	0	0	0	0	0	0	0	0	0	0	0	0
Zotu2288	0	0	0	0	0	0	0	0	0	0	0	0	0	0	0	0	0	0	0	0	0	0	0	0	0	0	0	0	0	0	0	0	0	0	0	0	0	0	0	0	0	0	0	0	0	0	0	0	0
Zotu2289	0	0	0	0	0	0	0	0	0	0	0	0	0	0	0	0	0	0	0	0	0	0	0	0	0	0	0	0	0	0	0	0	0	0	0	0	0	0	0	0	0	0	0	0	0	0	0	0	0
Zotu229	1	0	0	0	0	11	0	0	0	0	0	811	1	0	0	0	0	0	0	0	0	0	0	0	0	0	0	0	114	0	0	0	0	0	1	0	0	0	2	0	0	0	0	0	0	0	0	0	0
Zotu2290	0	0	0	0	0	0	0	0	0	0	0	0	0	0	0	0	0	0	0	0	0	0	0	0	0	0	0	0	0	0	0	0	0	0	0	0	0	0	0	0	0	0	0	0	0	0	0	0	0
Zotu2291	0	0	0	0	0	0	0	0	0	0	0	0	0	0	0	0	0	0	0	0	0	0	0	0	0	0	0	0	0	0	0	0	0	0	0	0	0	0	0	0	0	0	0	0	0	0	0	0	0
Zotu2292	0	0	0	0	0	0	0	0	0	0	0	0	0	0	0	0	0	0	0	0	0	0	0	0	0	0	0	0	0	0	0	0	0	0	0	0	0	0	0	0	0	0	0	0	0	0	0	0	0
Zotu2293	0	0	0	0	0	0	0	0	0	0	0	0	0	0	0	0	0	0	0	0	0	0	0	0	0	0	0	0	0	0	0	0	0	0	0	0	0	0	0	0	0	0	0	0	0	0	0	0	0
Zotu2294	0	0	0	0	0	0	0	0	0	0	0	0	0	0	0	0	0	0	0	0	0	0	0	0	0	0	0	0	0	0	0	0	0	0	0	0	0	0	0	0	0	0	0	0	0	0	0	0	0
Zotu2295	0	0	0	0	0	0	0	0	0	0	0	0	0	0	0	0	0	1	0	0	0	0	0	0	0	0	1	0	0	0	0	2	0	0	0	0	0	0	0	0	0	0	0	0	0	0	0	0	0
Zotu2296	0	0	0	0	0	0	0	0	0	0	0	0	0	0	0	0	0	0	0	0	0	0	0	0	0	0	0	0	0	0	0	0	0	0	0	0	0	0	0	0	0	0	0	0	0	0	0	0	0
Zotu2297	0	0	0	0	0	0	0	0	0	0	0	0	0	0	0	0	0	0	0	0	0	0	0	0	0	0	0	0	0	0	0	0	0	0	0	0	0	0	0	0	0	0	0	0	0	0	0	0	0
Zotu2298	0	0	1	0	1	0	0	0	0	0	0	0	0	0	0	0	4	0	1	0	0	0	0	0	0	0	0	0	0	0	0	0	0	1	0	0	0	2	0	0	0	0	0	0	0	0	0	0	0
Zotu2299	0	0	0	0	0	0	0	0	0	0	0	0	0	0	0	0	0	0	0	0	0	29	0	0	0	0	0	0	0	0	0	0	0	0	0	0	0	0	0	0	0	0	0	0	0	0	0	0	0
Zotu23	2	3	0	4	3	0	0	0	0	0	0	0	0	3	3	0	0	94	0	1	0	0	0	2	9815	2	0	0	0	0	0	0	0	0	0	0	0	0	0	3	0	0	0	0	0	0	0	0	0
Zotu230	0	0	0	1	0	0	0	0	0	0	0	0	0	0	1	0	0	0	0	0	0	0	0	0	0	0	0	0	85	0	0	1	0	0	0	0	0	0	0	0	0	0	0	0	0	0	1	0	0
Zotu2300	0	0	0	0	0	0	0	0	0	0	0	0	0	0	0	0	0	0	0	0	0	0	0	0	0	0	0	0	0	0	0	0	0	0	0	0	0	0	0	0	0	0	0	0	0	0	0	0	0
Zotu2301	1	0	0	0	0	0	0	0	0	0	0	0	5	47	0	0	0	1	15	0	0	0	0	0	0	0	0	0	0	0	2	0	0	0	1	1	0	0	15	0	0	0	0	0	0	0	0	0	0
Zotu2302	0	0	0	0	0	0	0	0	0	0	0	0	0	0	0	0	0	0	0	0	0	0	0	0	0	0	0	0	1	0	0	0	0	0	0	0	0	0	0	0	0	0	0	0	0	0	0	0	0
Zotu2303	0	0	0	0	0	0	0	0	0	0	0	0	0	0	0	0	0	0	0	0	0	0	0	0	0	0	0	0	0	0	0	0	0	0	0	0	0	0	0	0	0	0	0	0	0	0	0	0	0
Zotu2304	0	0	0	0	0	0	0	0	0	0	0	0	0	0	0	0	0	0	0	0	0	0	0	0	0	0	0	0	0	0	0	0	0	0	0	0	0	0	0	0	0	0	0	0	0	0	0	0	0
Zotu2305	0	0	0	0	0	0	0	0	0	0	0	0	0	0	0	0	0	0	0	0	0	0	0	0	0	0	0	0	0	0	0	0	0	0	0	0	0	0	0	0	0	0	0	0	0	0	0	0	0
Zotu2306	0	0	0	0	0	0	0	0	0	0	0	0	0	0	0	0	0	0	0	0	0	0	0	0	0	0	0	0	0	0	0	0	0	0	0	0	0	0	0	0	0	0	0	0	0	0	0	0	0
Zotu2307	0	0	0	0	0	0	0	0	0	0	0	0	0	0	0	0	0	0	0	0	0	0	0	0	0	0	0	0	0	0	0	0	0	0	0	0	0	0	0	0	0	0	0	0	0	0	0	0	0
Zotu2308	0	0	0	0	0	0	0	0	0	0	0	0	0	0	0	0	0	0	0	0	0	0	0	0	0	0	0	0	0	0	0	0	0	0	0	0	0	0	0	0	0	0	0	0	0	0	0	0	0
Zotu2309	0	0	0	0	0	0	0	0	0	0	0	0	0	0	0	0	0	0	0	0	0	0	0	0	0	0	0	0	0	0	0	0	0	0	0	0	0	0	0	0	0	0	0	0	0	0	0	0	0
Zotu231	0	0	1	0	0	1	0	0	0	0	0	0	0	0	0	0	0	0	0	0	0	0	0	1	0	0	0	0	0	0	0	0	0	0	0	0	0	0	0	0	0	0	0	0	0	0	0	0	0
Zotu2310	0	0	0	0	0	0	0	0	0	0	0	0	0	0	0	0	0	0	0	0	0	0	0	0	0	0	0	0	0	0	0	0	0	0	0	0	0	0	0	0	0	0	0	0	0	0	0	0	0
Zotu2311	0	0	0	0	0	0	0	0	0	0	0	0	0	0	0	0	0	0	0	0	0	0	0	0	0	0	0	0	0	0	0	0	0	0	0	0	0	0	0	0	0	0	0	0	0	0	0	0	0
Zotu2312	0	0	0	0	0	0	0	0	0	0	0	0	0	0	0	0	0	0	0	0	0	0	0	0	0	0	0	0	0	0	0	0	0	0	0	0	0	0	0	0	0	0	0	0	0	0	0	0	0
Zotu2313	0	0	0	0	0	0	0	0	0	0	0	0	0	0	0	0	0	0	0	0	0	0	46	0	0	0	0	0	0	0	0	0	0	0	0	0	0	0	0	0	0	0	0	0	0	0	0	0	0
Zotu2314	0	0	0	0	0	0	0	0	0	0	0	0	0	0	0	0	0	0	0	0	0	0	0	0	0	0	0	0	0	0	0	0	0	0	0	0	0	0	0	0	0	0	0	0	0	0	0	0	0
Zotu2315	0	0	0	0	0	0	0	0	0	0	0	0	0	0	0	0	0	0	0	0	0	0	0	0	0	0	0	0	0	0	0	0	0	0	0	0	0	0	0	0	0	0	0	0	0	0	0	0	0
Zotu2316	0	0	0	0	0	0	0	0	0	0	0	0	0	0	0	0	0	0	0	0	0	0	0	0	0	0	0	0	0	0	0	0	0	0	0	0	0	0	0	0	0	0	0	0	0	0	0	0	0
Zotu2317	0	0	0	0	0	0	0	0	0	0	0	0	0	0	0	0	0	0	0	0	0	0	0	0	0	0	0	0	0	0	0	0	0	0	0	0	0	0	0	0	0	0	0	0	0	0	0	0	0
Zotu2318	0	0	0	0	0	0	0	0	0	0	0	0	0	0	0	0	0	0	0	0	0	0	0	0	0	0	0	0	0	0	0	0	0	0	0	0	0	0	0	0	0	0	0	0	0	0	0	0	0
Zotu2319	0	0	0	0	0	0	0	0	0	0	0	0	0	0	0	0	0	0	0	0	0	0	0	0	0	0	0	0	0	0	0	0	0	0	0	0	0	0	0	0	0	0	0	0	0	0	0	0	0
Zotu232	0	0	0	0	0	0	0	0	0	0	0	0	0	0	0	0	0	0	0	0	0	0	0	0	0	0	0	0	0	0	0	0	0	1	0	0	0	0	0	0	0	1	1	0	0	0	0	0	0
Zotu2320	0	0	0	0	0	0	0	0	0	0	0	0	0	0	0	0	0	0	0	0	0	0	0	0	0	0	0	0	0	0	0	0	0	0	0	0	0	0	0	0	0	0	0	0	0	0	0	0	0
Zotu2321	0	0	0	0	0	0	0	0	0	0	0	0	0	0	0	0	0	0	0	0	0	0	0	0	0	0	0	0	0	0	0	0	0	0	0	0	0	0	0	0	0	0	0	0	0	0	0	0	0
Zotu2322	5	0	0	0	0	0	0	0	0	0	0	0	0	0	0	0	0	0	0	0	0	0	0	0	0	0	0	0	0	0	0	0	0	0	0	0	0	0	0	0	0	0	0	0	0	0	0	0	0
Zotu2323	0	0	0	0	0	0	0	0	0	0	0	0	0	0	0	0	0	0	0	0	0	0	0	0	0	0	0	0	0	0	0	0	0	0	0	0	0	0	0	0	0	0	0	0	0	0	0	0	0
Zotu2324	0	0	0	0	0	0	0	0	0	0	0	0	0	0	0	0	0	0	0	0	0	0	0	0	0	0	0	0	0	0	0	0	0	0	0	0	0	0	0	0	0	0	0	0	0	0	0	0	0
Zotu2325	0	0	0	0	0	0	0	0	0	0	0	0	0	0	0	0	0	0	0	0	0	0	0	0	0	0	0	0	0	0	0	0	0	0	0	0	0	0	0	0	0	0	0	0	0	0	0	0	0
Zotu2326	0	0	0	0	0	0	0	0	0	0	0	0	0	0	0	0	0	0	0	0	0	0	0	0	0	0	0	0	0	0	0	0	0	0	0	0	0	0	0	0	0	0	0	0	0	0	0	0	0
Zotu2327	0	0	0	0	0	0	0	0	0	0	0	0	0	0	0	0	0	0	0	0	0	0	0	0	0	0	0	0	0	0	0	0	0	0	0	0	0	0	0	0	0	0	0	0	0	0	0	0	0
Zotu2328	0	0	0	0	0	0	0	0	0	0	0	0	0	0	0	0	0	0	0	0	0	0	0	0	0	0	0	0	0	0	0	0	0	0	0	57	0	0	0	0	0	0	0	0	0	0	0	0	0
Zotu2329	0	0	0	0	0	0	0	0	0	0	0	0	0	0	0	0	0	0	0	0	0	0	0	0	0	0	36	0	0	0	0	0	0	0	0	0	0	0	0	0	0	0	0	0	0	0	0	0	0
Zotu233	0	0	0	0	0	0	0	0	0	0	0	0	0	0	0	0	0	0	0	0	0	0	0	0	0	0	0	0	0	0	0	2	0	0	0	0	0	0	0	0	0	0	0	0	0	0	0	0	0
Zotu2330	0	0	0	0	0	0	0	0	0	0	0	0	0	0	0	0	0	0	0	0	0	0	0	0	0	0	0	0	0	0	0	0	0	0	0	0	0	0	0	0	0	0	0	0	0	0	0	0	0
Zotu2331	0	0	0	0	0	0	0	0	0	0	0	0	0	0	0	0	0	0	0	0	0	0	0	0	0	0	0	0	0	0	0	0	0	0	0	0	0	0	0	0	0	0	0	0	0	0	0	0	0
Zotu2332	0	0	0	0	0	0	0	0	0	0	0	0	0	0	0	0	0	0	0	0	0	0	0	0	0	0	0	0	0	0	0	0	0	0	0	0	0	0	0	0	0	0	0	0	0	0	0	0	0
Zotu2333	0	0	0	0	0	0	0	0	0	0	0	0	0	0	0	0	0	0	0	0	0	0	0	0	0	0	0	0	0	0	0	0	0	0	0	0	0	0	0	0	0	0	0	0	0	0	0	0	0
Zotu2334	0	0	0	0	0	0	0	0	0	0	0	0	0	0	0	0	0	0	0	0	0	0	0	0	0	0	0	0	0	0	0	0	0	0	0	0	0	0	0	0	0	0	0	0	0	0	0	0	0
Zotu2335	0	0	0	0	0	0	0	0	0	0	0	0	0	0	0	0	0	0	0	0	0	0	0	0	0	0	0	0	0	0	0	0	0	0	0	0	0	0	0	0	0	0	0	0	0	0	0	0	0
Zotu2336	0	0	0	0	0	0	0	0	0	0	0	0	0	0	0	0	0	0	0	0	0	0	0	0	0	0	0	0	0	0	0	0	0	0	0	0	0	0	0	0	0	0	0	0	0	0	0	0	0
Zotu2337	0	0	0	0	0	0	0	0	0	0	0	0	0	0	0	0	0	0	0	0	0	0	0	0	0	0	0	0	0	0	0	0	0	0	0	0	0	0	0	0	0	0	0	0	0	0	0	0	0
Zotu2338	0	0	0	0	0	0	0	0	0	0	0	0	0	0	0	0	0	0	0	0	0	0	0	0	0	0	0	0	0	0	0	0	0	0	0	0	0	0	0	0	0	0	0	0	0	0	0	0	0
Zotu2339	0	0	0	0	0	0	0	0	0	0	0	0	0	0	0	0	0	0	0	0	0	0	0	0	0	0	0	0	0	0	0	0	0	0	0	0	0	0	0	0	0	0	0	0	0	0	0	0	0
Zotu234	0	0	0	0	0	0	0	0	0	0	0	0	0	0	0	0	0	40	1	0	0	0	0	0	0	0	0	0	0	0	0	0	1	0	0	0	0	0	0	0	0	0	0	0	0	0	0	0	0
Zotu2340	0	0	0	0	0	0	0	0	0	0	0	0	0	0	0	0	0	0	0	0	0	0	0	0	0	0	0	0	0	0	0	0	0	0	0	0	0	0	0	0	0	0	0	0	0	0	0	0	0
Zotu2341	0	0	0	0	0	0	0	0	0	0	0	0	0	0	0	0	0	0	0	0	0	0	0	0	0	0	0	0	0	0	0	0	0	0	0	0	0	0	0	0	0	0	0	0	0	0	0	0	0
Zotu2342	0	0	0	0	0	0	0	0	0	0	0	0	0	0	0	0	0	0	0	0	0	0	0	0	0	0	0	0	0	0	0	0	0	0	0	0	0	0	0	0	0	0	0	0	0	0	0	0	0
Zotu2343	0	0	0	0	0	0	0	0	0	0	0	0	0	0	0	0	0	0	0	0	0	0	0	0	0	0	0	0	0	0	0	0	0	0	0	0	0	0	0	0	0	0	0	0	0	0	0	0	0
Zotu2344	0	0	0	0	0	0	0	0	0	0	0	0	0	0	0	0	0	0	0	0	0	0	0	0	0	0	0	0	0	0	0	0	0	0	0	0	0	0	0	0	0	0	0	0	0	0	0	0	0
Zotu2345	0	0	0	0	0	0	0	0	0	0	0	0	0	0	0	0	0	0	0	0	0	0	0	0	0	0	0	0	0	0	0	0	0	0	0	0	0	0	0	0	0	0	0	0	0	0	0	0	0
Zotu2346	0	0	0	0	0	0	0	0	0	0	0	0	0	0	0	0	0	0	0	0	0	0	0	0	0	0	0	0	0	0	0	0	0	0	0	0	0	0	0	0	0	0	0	0	0	0	0	0	0
Zotu2347	0	0	0	0	0	0	0	0	0	0	0	0	0	0	0	0	0	0	0	0	0	0	0	0	0	0	0	0	0	0	0	0	0	0	0	0	0	0	0	0	0	0	0	0	0	0	0	0	0
Zotu2348	0	0	0	0	0	0	0	0	0	0	0	0	0	0	0	0	0	0	0	0	0	0	0	0	0	0	0	0	0	0	0	0	0	0	0	0	0	0	0	0	0	0	0	0	0	0	0	0	0
Zotu2349	0	0	0	0	0	0	0	0	0	0	0	0	0	0	0	0	0	0	0	0	0	0	24	0	0	0	0	0	0	0	0	0	0	0	0	0	0	0	0	0	0	0	0	0	0	0	0	0	0
Zotu235	0	0	0	0	0	0	0	0	0	0	0	0	0	0	3	0	0	0	0	0	0	0	0	0	0	2	0	0	0	0	0	0	0	0	0	0	0	0	0	0	1	0	0	0	0	0	0	0	0
Zotu2350	0	0	0	0	0	0	0	0	0	0	0	0	0	0	0	0	0	0	0	0	0	0	0	0	0	0	0	0	9	0	0	0	0	0	0	0	0	0	0	0	0	0	0	0	0	0	0	0	0
Zotu2351	0	0	0	0	2	0	0	0	0	0	0	0	0	104	0	0	0	0	0	0	0	0	0	0	0	0	0	0	0	0	0	0	0	0	0	0	0	0	0	0	0	0	0	0	0	0	0	0	0
Zotu2352	0	0	0	0	0	0	0	0	0	0	0	0	0	0	0	0	0	0	0	0	0	0	0	0	0	0	0	0	0	0	0	0	0	0	0	0	0	0	0	0	0	0	0	0	0	0	0	0	0
Zotu2353	0	0	0	0	0	1	0	0	0	0	0	0	0	0	0	0	0	0	0	0	0	0	0	0	0	0	0	0	0	0	0	0	0	0	0	0	0	0	0	0	0	0	0	0	0	0	0	0	0
Zotu2354	0	0	0	0	0	0	0	0	0	0	0	0	0	0	0	0	0	0	0	0	23	0	0	0	0	0	0	0	0	0	0	0	0	0	0	0	0	0	0	0	0	0	0	0	0	0	0	0	0
Zotu2355	0	0	0	0	0	0	0	0	0	0	0	0	0	0	0	0	0	0	0	0	0	0	0	0	0	0	0	0	0	0	0	0	0	0	0	0	0	0	0	0	0	0	0	0	0	0	0	0	0
Zotu2356	0	0	0	0	0	0	0	0	0	0	0	0	0	0	0	0	0	0	0	0	0	0	0	0	0	0	0	0	0	0	0	0	0	0	0	0	0	0	0	0	0	0	0	0	0	0	0	0	0
Zotu2357	0	0	0	0	0	0	0	0	0	0	0	0	0	0	0	0	0	0	0	0	0	0	0	0	0	0	0	0	0	0	0	0	0	0	0	0	0	0	0	0	0	0	0	0	0	0	0	0	0
Zotu2358	0	0	0	0	0	0	0	0	0	0	0	0	0	0	0	0	0	0	0	0	0	0	0	0	0	0	0	0	0	0	0	0	0	0	0	0	0	0	0	0	0	0	0	0	0	0	0	0	0
Zotu2359	0	0	0	0	0	0	0	0	0	0	0	0	0	0	0	0	0	0	0	0	0	0	0	0	0	0	0	0	0	0	0	0	0	0	0	0	0	0	0	0	0	0	0	0	0	0	0	0	0
Zotu236	0	0	0	0	0	0	0	0	0	0	0	0	0	0	0	0	0	0	0	0	0	0	66	0	0	0	0	0	36	0	0	0	0	0	0	0	0	0	0	0	0	0	0	0	0	0	2	0	0
Zotu2360	0	0	0	0	0	0	0	0	0	0	0	0	0	0	0	0	0	0	0	0	0	0	0	0	0	0	0	0	0	0	0	0	0	0	0	0	0	0	0	0	0	0	0	0	0	0	0	0	0
Zotu2361	0	0	0	0	0	0	0	0	0	0	0	0	0	0	0	0	0	0	0	0	0	0	0	0	0	0	0	0	0	0	0	0	0	0	0	0	0	0	0	0	0	0	0	0	0	0	0	0	0
Zotu2362	0	0	0	0	0	0	0	0	0	0	0	0	0	0	0	0	0	0	0	0	0	0	0	0	0	0	0	0	0	0	0	0	0	0	0	0	0	0	0	0	0	0	0	0	0	0	0	0	0
Zotu2363	0	0	0	0	0	0	0	0	0	0	0	0	0	0	0	0	0	0	0	0	0	0	0	0	0	0	0	0	0	0	0	0	0	0	0	0	0	0	0	0	0	0	0	0	0	0	0	0	0
Zotu2364	0	0	0	0	0	0	0	0	0	0	0	0	0	0	0	0	0	0	0	0	0	0	0	0	0	0	0	0	0	0	0	0	0	0	0	0	0	0	0	0	0	0	0	0	0	0	0	0	0
Zotu2365	1	0	0	0	0	0	0	0	0	0	0	0	0	0	0	0	0	0	0	0	0	0	0	0	0	0	0	0	0	0	0	0	0	0	0	0	0	0	0	0	0	0	0	0	0	0	0	0	0
Zotu2366	0	0	0	0	0	0	0	0	0	0	0	0	0	0	0	0	0	0	0	0	0	0	0	0	0	0	0	0	0	0	0	0	0	0	0	0	0	0	0	0	0	0	0	0	0	0	0	0	0
Zotu2367	0	0	0	0	0	0	0	0	0	0	0	0	0	0	0	0	0	0	0	0	0	0	0	0	0	0	0	0	0	0	0	0	0	0	0	0	0	0	0	0	0	0	0	0	0	0	0	0	0
Zotu2368	0	0	0	0	0	0	0	0	0	0	0	0	0	0	0	0	0	1	0	0	0	0	0	0	0	0	0	0	0	0	0	0	0	0	0	0	0	0	0	0	0	0	0	0	0	0	0	0	0
Zotu2369	0	0	0	0	0	0	0	0	0	0	0	0	0	0	0	0	0	0	0	0	0	0	0	0	0	0	0	0	0	0	0	0	0	0	0	0	0	0	0	0	0	0	0	0	0	0	0	0	0
Zotu237	0	1383	0	0	0	0	0	0	0	0	0	0	0	11	0	0	0	0	0	0	0	0	0	0	0	0	0	0	1	0	0	0	0	0	0	0	0	0	0	10	0	0	0	0	0	0	0	0	0
Zotu2370	0	0	0	0	0	0	0	0	0	0	0	0	0	0	0	0	0	0	0	0	0	0	0	0	0	0	0	0	0	0	0	0	0	0	0	0	0	0	0	0	0	0	0	0	0	0	0	0	0
Zotu2371	0	0	0	0	0	0	0	0	0	0	0	0	0	0	0	0	0	0	0	0	0	0	0	0	0	0	0	0	0	0	0	0	0	0	0	0	0	0	0	0	0	0	0	0	0	0	0	0	0
Zotu2372	0	0	0	0	0	0	0	0	0	0	0	0	0	0	0	0	0	0	0	0	0	0	0	0	0	0	0	0	0	0	0	0	0	0	0	0	0	0	0	0	0	0	0	0	0	0	0	0	0
Zotu2373	0	0	0	0	0	0	0	0	0	0	0	0	0	0	0	0	14	0	0	0	0	0	0	0	0	0	0	0	0	0	0	0	1	0	0	0	0	0	0	0	0	0	0	0	0	0	0	0	0
Zotu2374	0	0	0	0	0	0	0	0	0	0	0	0	0	0	0	0	0	0	0	0	0	0	0	0	0	0	0	0	0	0	0	0	0	0	0	0	0	0	0	0	0	0	0	0	0	0	0	0	0
Zotu2375	0	0	0	0	0	0	0	0	0	0	0	0	0	0	0	0	0	0	0	0	0	0	0	0	0	0	0	0	0	0	0	0	0	0	0	0	0	0	0	0	0	0	0	0	0	0	0	0	0
Zotu2376	0	0	0	0	0	0	0	0	0	0	0	0	0	0	0	0	0	0	0	0	0	0	0	0	0	0	0	0	0	0	0	0	0	0	0	0	0	0	0	0	0	0	0	0	0	0	0	0	0
Zotu2377	0	0	0	0	0	0	0	0	0	0	0	0	0	0	0	0	0	0	0	0	0	0	0	0	0	0	0	0	0	0	0	0	0	0	0	0	0	0	8	0	0	0	0	0	0	0	0	0	0
Zotu2378	0	0	0	0	0	0	0	0	0	0	0	0	0	0	0	0	0	7	0	0	0	0	0	0	0	0	0	0	0	0	0	0	0	0	0	0	0	0	0	0	0	0	0	0	0	0	0	0	0
Zotu2379	0	0	0	0	0	0	0	0	0	15	0	0	0	0	0	0	0	1	0	0	0	0	0	0	0	0	0	0	0	0	0	0	1	0	0	0	0	0	0	0	0	0	0	0	0	0	0	0	0
Zotu238	0	0	0	0	0	0	0	0	0	0	0	0	0	0	0	0	0	0	0	0	0	0	0	0	0	0	0	0	0	0	0	0	0	0	0	0	0	0	0	0	0	0	0	0	0	0	0	0	0
Zotu2380	0	0	0	0	0	0	0	0	0	0	0	0	0	0	0	0	0	0	0	0	0	0	0	0	0	0	0	0	0	0	0	0	0	0	0	0	0	0	0	0	0	0	0	0	0	0	0	0	0
Zotu2381	0	0	0	0	0	0	0	0	0	0	0	0	0	0	0	0	0	0	0	0	0	0	0	0	0	0	0	0	0	0	0	0	0	0	0	0	0	0	0	0	0	0	0	0	0	0	0	0	0
Zotu2382	0	0	0	0	0	0	0	0	0	0	0	0	0	0	0	0	0	0	0	0	0	0	0	0	0	0	0	0	0	0	0	0	0	0	0	0	0	0	0	0	0	0	0	0	0	0	0	0	0
Zotu2383	0	0	0	0	0	0	0	0	0	0	0	0	0	0	0	0	0	0	0	0	0	0	0	0	0	0	0	0	0	0	0	0	0	0	0	0	0	0	0	0	0	0	0	0	0	0	0	0	0
Zotu2384	0	0	0	0	0	0	0	0	0	0	0	0	0	0	0	0	0	0	0	0	0	0	0	0	0	0	0	0	0	0	0	0	0	0	0	0	0	0	0	0	0	0	0	0	0	0	0	0	0
Zotu2385	0	0	0	0	0	0	0	0	0	0	0	0	0	0	0	0	0	0	0	0	0	0	0	0	0	0	0	0	0	0	0	0	0	0	0	0	0	0	0	0	0	0	0	0	0	0	0	0	0
Zotu2386	0	0	0	0	0	0	0	0	0	0	0	0	0	0	0	0	0	0	0	0	0	0	0	0	0	0	0	0	0	0	0	0	0	0	0	0	0	0	0	0	0	0	0	0	0	0	0	0	0
Zotu2387	0	0	0	0	0	0	0	0	0	0	0	0	0	0	0	0	0	0	0	0	0	0	0	0	0	0	0	0	0	0	0	0	0	0	0	0	0	0	0	0	0	0	0	0	0	0	0	0	0
Zotu2388	0	0	0	0	0	0	0	0	0	0	0	0	0	0	0	0	0	0	0	0	0	0	0	0	0	0	0	0	0	0	0	0	0	0	0	0	0	0	0	0	0	0	0	0	0	0	0	0	0
Zotu2389	0	0	0	0	0	0	0	0	0	0	0	0	0	0	0	0	0	0	0	0	0	0	0	0	0	0	0	0	0	0	0	0	0	0	0	0	0	0	0	0	0	0	0	0	0	0	0	0	0
Zotu239	0	0	0	0	0	0	0	0	0	0	0	0	0	0	0	0	0	0	0	0	0	0	0	0	0	0	0	0	0	0	0	0	0	0	0	0	0	0	0	0	0	0	0	0	0	0	0	0	0
Zotu2390	0	0	0	0	0	0	0	0	0	0	0	0	0	0	0	0	0	0	0	0	0	0	0	0	0	0	0	0	0	0	0	0	0	0	0	0	0	0	0	0	0	0	0	0	0	0	0	0	0
Zotu2391	0	0	0	0	0	0	0	0	19	0	0	0	0	0	0	0	0	0	0	0	2	0	0	0	0	0	0	0	0	0	1	0	0	0	0	0	0	2	0	0	0	0	0	1	0	3	0	0	0
Zotu2392	0	0	0	0	0	0	0	0	0	0	0	0	0	0	0	0	0	0	0	0	0	0	0	0	0	0	0	0	0	0	0	0	0	0	0	0	0	0	0	0	0	0	0	0	0	0	0	0	0
Zotu2393	0	0	0	0	0	0	0	0	0	0	0	0	0	0	0	0	0	0	0	0	0	0	0	0	0	0	0	0	0	0	0	0	0	0	0	0	0	1	0	0	0	0	0	0	0	0	0	0	0
Zotu2394	0	0	0	0	0	0	0	0	0	0	0	0	0	0	0	0	0	0	0	0	0	0	0	0	0	0	0	0	0	0	0	0	0	0	0	0	0	0	0	0	0	0	0	0	0	0	0	0	0
Zotu2395	0	0	0	0	0	0	0	0	0	0	0	0	0	0	0	0	0	0	0	0	0	0	0	0	0	0	0	0	0	0	0	0	0	0	0	0	0	0	0	0	0	0	0	0	0	0	0	0	0
Zotu2396	0	0	0	0	0	0	0	0	0	16	0	0	0	0	0	0	0	0	0	0	0	0	0	0	0	0	0	0	0	0	0	0	0	0	0	0	0	0	0	0	0	0	0	0	0	0	0	0	0
Zotu2397	0	0	0	0	0	0	0	0	0	0	0	0	0	0	0	0	0	0	0	0	0	0	0	0	0	0	0	0	0	0	0	0	0	0	0	0	0	0	0	0	0	0	0	0	0	0	0	0	0
Zotu2398	0	0	0	0	0	0	0	0	0	0	0	0	0	0	0	0	0	0	0	0	0	0	0	0	0	0	0	0	0	0	0	0	0	0	0	0	0	0	0	0	0	0	0	0	0	0	0	0	0
Zotu2399	0	0	0	0	0	0	0	0	0	0	0	0	0	0	0	0	0	0	0	0	1	0	0	0	0	0	0	0	0	0	0	0	1	0	0	0	0	0	0	2	7	0	0	4	0	0	0	0	0
Zotu24	3	5	1	0	0	14	0	1	2	0	0	0	0	0	0	0	1	18	0	1	0	0	0	2	0	0	0	433	2	1	0	1	0	1	0	0	0	1	8	1	1	1	1	0	0	2	2	0	0
Zotu240	200	0	0	0	1	0	1	0	1025	0	0	0	0	0	0	0	0	0	0	0	0	0	0	0	0	0	0	0	0	0	0	0	0	0	0	0	0	0	0	0	0	0	0	0	0	0	0	0	0
Zotu2400	0	0	0	0	0	0	0	0	0	0	0	0	0	0	0	0	0	0	0	0	0	0	0	0	0	0	0	0	0	0	0	0	0	0	0	0	0	0	0	0	0	0	0	0	0	0	0	0	0
Zotu2401	0	0	0	0	0	0	0	0	0	0	0	0	0	0	0	0	0	0	0	0	0	0	0	0	0	0	0	0	0	0	0	0	0	0	0	0	0	0	0	0	0	0	0	0	0	0	0	0	0
Zotu2402	0	0	0	0	0	0	0	0	0	0	0	0	0	0	0	0	0	0	0	0	0	0	0	0	0	0	0	0	0	0	0	0	0	0	0	0	0	0	0	0	0	0	0	0	0	0	0	0	0
Zotu2403	0	0	0	0	0	0	0	0	0	0	0	0	0	0	0	0	0	0	0	0	0	0	0	0	0	0	0	0	0	0	0	0	0	0	0	0	0	0	0	0	0	0	0	0	0	0	0	0	0
Zotu2404	0	0	0	0	0	0	0	0	0	0	0	0	0	0	0	0	0	0	0	0	0	0	0	0	0	0	0	0	0	0	0	0	0	0	0	0	0	0	0	0	0	0	0	0	0	0	0	0	0
Zotu2405	0	0	0	0	0	0	0	0	0	0	0	0	0	0	0	0	0	0	0	0	0	0	0	0	0	0	0	0	0	0	0	0	0	0	0	0	0	0	0	0	0	0	0	0	0	0	0	0	0
Zotu2406	0	0	0	0	0	0	0	0	0	0	0	0	0	0	0	0	0	0	0	0	0	0	0	0	0	0	0	0	0	0	0	0	0	0	0	0	0	0	0	0	0	0	0	0	0	0	0	0	0
Zotu2407	0	0	0	0	0	0	0	0	0	0	0	0	0	0	0	0	0	0	0	0	0	0	0	0	0	0	0	0	0	0	0	0	0	0	0	0	0	0	0	0	0	0	0	0	0	0	0	0	0
Zotu2408	0	0	0	0	0	0	0	0	0	0	0	0	0	0	0	0	0	5	0	0	0	0	0	0	0	0	0	0	0	0	0	0	0	0	0	0	0	0	0	0	0	0	0	0	0	0	0	0	0
Zotu2409	0	0	0	0	0	0	0	0	0	0	0	0	0	0	0	0	0	0	0	0	0	0	0	0	0	0	0	0	0	0	0	0	0	0	0	0	0	0	0	0	0	0	0	0	0	0	0	0	0
Zotu241	0	0	0	0	0	0	0	0	0	0	0	0	0	0	0	0	0	2	0	0	0	0	0	0	0	0	0	0	0	0	0	0	0	0	0	0	0	0	0	0	0	0	0	0	0	0	0	0	0
Zotu2410	0	0	0	0	0	0	0	0	0	0	0	0	0	0	0	0	0	0	0	0	0	0	0	0	0	0	0	0	0	0	0	0	0	0	0	0	0	0	0	0	0	0	0	0	0	0	0	0	0
Zotu2411	0	0	0	0	0	0	0	0	0	0	0	0	0	0	0	0	0	0	0	0	0	0	0	0	0	0	0	0	0	0	0	0	0	0	0	0	0	0	0	0	0	0	0	0	0	0	0	0	0
Zotu2412	0	0	0	0	1	1	3	2	2	1	0	0	1	14	0	0	6	2	2	0	0	0	0	0	0	0	0	0	0	0	0	0	0	1	0	0	0	1	1	0	0	0	0	0	0	1	0	1	18
Zotu2413	0	0	0	0	0	0	0	0	0	0	0	0	0	0	0	0	0	0	0	0	0	0	0	0	0	0	0	0	0	0	0	0	0	0	0	0	0	0	0	0	0	0	0	0	0	0	0	0	0
Zotu2414	0	0	0	0	0	0	0	0	0	0	0	0	0	0	0	0	0	0	0	0	0	0	0	0	0	0	0	0	0	0	0	0	0	0	0	0	0	0	0	0	0	0	0	0	0	0	0	0	0
Zotu2415	0	0	0	0	0	0	0	0	0	0	0	0	0	0	0	0	0	0	0	0	0	0	0	0	0	0	0	0	0	0	0	0	0	0	0	0	0	0	0	0	0	0	0	0	0	0	0	0	0
Zotu2416	0	0	0	0	0	0	0	0	0	0	0	0	0	0	0	0	0	0	0	0	0	0	0	0	0	0	0	0	8	0	0	0	0	0	0	0	0	0	0	0	0	0	0	0	0	0	0	0	0
Zotu2417	0	0	0	1	0	0	0	0	0	0	0	0	0	0	0	0	0	0	0	1	0	0	0	0	0	0	0	0	0	0	0	0	0	0	0	0	0	0	0	0	0	0	0	0	0	0	0	0	0
Zotu2418	0	0	0	0	4	0	0	0	0	0	0	0	0	0	0	0	0	0	0	0	0	0	0	0	0	0	0	0	0	0	0	0	0	0	0	0	0	0	0	0	0	0	0	0	0	0	0	0	0
Zotu2419	0	0	0	0	0	0	0	0	0	0	0	0	0	0	0	0	0	0	0	0	0	0	2	0	0	0	0	0	0	0	0	0	0	0	0	0	0	0	0	0	0	0	0	0	0	0	0	0	0
Zotu242	0	0	0	0	0	0	0	0	0	0	0	0	0	0	0	0	0	0	0	0	0	0	0	0	0	0	0	0	13	0	0	0	0	0	0	0	0	0	0	0	0	0	0	0	0	0	0	0	0
Zotu2420	0	0	0	0	0	0	0	0	0	0	0	0	0	0	0	0	0	0	0	0	0	0	0	0	0	0	0	0	0	0	0	0	0	0	0	0	0	0	0	0	0	0	0	0	0	0	0	0	0
Zotu2421	0	0	0	0	0	0	0	0	0	0	0	0	0	0	0	0	0	0	0	0	0	0	0	0	0	0	0	0	0	0	0	0	0	0	0	0	0	0	0	0	0	0	0	0	0	0	0	0	0
Zotu2422	0	0	0	0	0	0	0	0	0	0	0	0	0	0	0	0	0	2	0	0	0	0	0	0	0	0	0	0	0	0	0	0	0	0	0	0	0	0	0	0	0	0	0	0	0	0	0	0	0
Zotu2423	0	0	0	0	0	0	0	0	0	0	0	0	0	0	0	0	0	0	0	0	0	0	0	0	0	0	0	0	0	0	0	0	0	0	0	0	0	0	0	0	0	0	0	0	0	0	0	0	0
Zotu2424	0	0	0	0	0	0	0	0	0	0	0	0	0	0	0	0	0	0	0	0	0	0	0	0	0	0	0	0	0	0	0	0	0	0	0	0	0	0	0	0	0	0	0	0	0	0	0	0	0
Zotu2425	0	0	0	0	0	0	0	0	0	0	0	0	0	0	0	0	0	0	0	0	0	0	0	0	0	0	0	0	0	0	0	0	0	0	0	0	0	0	0	0	0	0	0	0	0	0	0	0	0
Zotu2426	0	0	0	0	0	0	0	0	0	0	0	0	0	0	0	0	0	0	0	0	0	0	0	0	0	0	0	0	0	0	0	0	0	0	0	0	0	0	0	0	0	0	0	0	0	0	0	0	0
Zotu2427	0	0	0	0	0	0	0	0	0	0	0	0	0	0	0	0	0	0	0	0	0	0	0	0	0	0	0	0	0	0	0	0	0	0	0	0	0	0	0	0	0	0	0	0	0	0	0	0	0
Zotu2428	0	0	0	0	0	0	0	0	0	0	0	0	0	0	0	0	0	0	0	0	0	0	0	0	0	0	0	0	0	0	0	0	0	0	0	0	0	0	0	0	0	0	0	0	0	0	0	0	0
Zotu2429	0	0	0	0	0	0	0	0	0	0	0	0	0	0	0	0	0	0	0	0	0	0	0	0	0	0	0	0	0	0	0	0	0	0	0	0	0	0	0	0	0	0	0	0	0	0	0	0	0
Zotu243	0	0	0	0	0	0	0	0	0	0	0	0	0	0	0	0	0	0	2	0	0	0	0	1	0	1	0	0	0	0	0	0	1	0	0	0	0	0	0	0	0	0	0	0	0	0	0	0	2
Zotu2430	0	0	0	0	0	0	0	0	0	0	0	0	0	0	0	0	0	0	0	0	0	0	0	0	0	0	0	0	0	0	0	0	0	0	0	0	0	0	0	0	0	0	0	0	0	0	0	0	0
Zotu2431	0	0	0	0	0	0	0	0	0	0	0	0	0	0	0	0	0	0	0	0	0	0	0	0	0	0	0	0	0	0	0	0	0	0	0	0	0	0	0	0	0	0	0	0	0	0	0	0	0
Zotu2432	0	0	0	0	0	0	0	0	0	0	0	0	0	0	0	0	0	0	0	0	0	0	0	0	0	0	0	0	0	0	0	0	0	0	0	0	0	0	0	0	0	0	0	0	0	0	0	0	0
Zotu2433	0	0	0	0	0	0	0	0	0	0	0	0	0	0	0	0	0	0	0	0	0	0	0	0	0	0	0	0	0	0	0	0	0	0	0	0	0	0	0	0	0	0	0	0	0	0	0	0	0
Zotu2434	0	0	0	0	0	0	0	0	0	0	0	0	0	0	0	0	0	0	0	0	0	0	0	0	0	0	0	0	0	0	0	0	0	0	0	0	0	0	0	0	0	0	0	0	0	0	0	0	0
Zotu2435	0	0	0	0	0	0	0	0	0	0	0	0	0	0	0	0	0	0	0	0	0	0	0	0	0	0	2	0	0	0	0	0	0	0	0	0	0	0	0	0	0	0	0	0	0	0	0	0	0
Zotu2436	0	0	0	0	0	0	0	0	0	4	0	0	0	0	0	0	0	0	0	0	0	0	0	0	0	0	0	0	0	0	0	0	0	0	0	0	0	0	0	0	0	0	0	0	0	0	0	0	0
Zotu2437	0	0	0	0	0	0	0	0	0	0	0	0	0	0	0	0	0	0	0	0	0	0	0	0	0	0	0	0	0	0	0	0	0	0	0	0	0	0	0	0	0	0	0	0	0	0	0	0	0
Zotu2438	0	0	0	0	0	0	0	0	0	0	0	0	0	0	0	0	0	0	0	0	0	0	1	0	0	0	0	0	0	0	0	0	0	0	0	0	0	0	0	0	0	0	0	0	0	0	0	0	0
Zotu2439	0	0	0	0	0	0	0	0	0	0	0	0	0	0	0	0	0	0	0	0	0	0	0	0	0	0	0	0	0	0	0	0	0	0	0	0	0	0	0	0	0	0	0	0	0	0	0	0	0
Zotu244	0	0	0	0	0	0	0	0	0	0	0	0	0	1	0	0	0	0	0	0	0	3	0	0	0	0	0	0	0	0	0	0	0	0	0	0	0	0	0	1	0	0	0	0	0	0	0	0	0
Zotu2440	0	0	0	0	0	0	0	0	0	0	0	0	0	0	0	0	0	0	0	0	0	0	0	0	0	0	0	0	0	0	0	0	0	0	0	0	0	0	0	0	0	0	0	0	0	0	0	0	0
Zotu2441	0	0	0	0	0	0	0	0	0	0	0	0	0	0	0	0	0	0	0	0	0	0	0	0	0	0	0	0	0	0	0	0	0	0	0	0	0	0	0	0	0	0	0	0	0	0	0	0	0
Zotu2442	0	0	0	0	0	0	0	0	0	0	0	0	0	0	0	0	0	0	0	0	0	0	0	0	0	0	0	0	0	0	0	0	0	0	0	0	0	0	0	0	0	0	0	0	0	0	0	0	0
Zotu2443	0	0	0	0	0	0	0	0	0	0	0	0	0	0	0	0	0	0	0	0	0	0	0	0	0	0	0	0	0	0	0	0	0	0	0	0	0	0	0	0	0	0	0	0	0	0	0	0	0
Zotu2444	0	0	0	0	0	0	0	0	0	0	0	0	0	0	0	0	0	0	0	0	0	0	0	0	0	0	0	0	0	0	0	0	0	0	0	0	0	0	0	0	0	0	0	0	0	0	0	0	0
Zotu2445	0	0	0	0	0	0	0	0	0	0	0	0	0	0	0	0	0	0	0	0	0	0	0	0	0	0	0	0	0	0	0	0	0	0	0	0	0	0	0	0	0	0	0	0	0	0	0	0	0
Zotu2446	0	0	0	0	0	0	0	0	0	0	0	0	0	0	0	0	0	0	0	0	0	0	0	0	0	0	0	0	0	0	0	0	0	0	0	0	0	0	0	0	0	0	0	0	0	0	0	0	0
Zotu2447	2	0	0	0	0	0	0	0	0	0	0	0	0	0	0	0	0	0	0	0	0	0	0	0	0	0	0	0	0	0	0	0	0	0	0	0	0	0	0	0	0	0	0	0	0	0	0	0	0
Zotu2448	0	0	0	0	0	0	0	0	0	0	0	0	0	0	0	0	0	0	0	0	0	0	0	0	0	0	0	0	0	0	0	0	0	0	0	0	0	0	0	0	0	0	0	0	0	0	0	0	0
Zotu2449	0	0	0	0	0	0	0	0	0	0	0	0	0	0	0	0	0	0	0	0	0	0	0	0	0	0	0	0	0	0	0	0	0	0	0	0	0	0	0	0	0	0	0	0	0	0	0	0	0
Zotu245	0	0	0	0	0	0	0	0	0	0	0	0	0	0	0	0	0	0	0	0	0	0	0	0	0	0	0	0	12	0	0	0	0	0	0	0	0	0	0	0	0	0	0	0	0	2	0	0	0
Zotu2450	0	0	0	0	0	0	0	0	0	0	0	0	0	0	0	0	0	0	0	0	0	0	0	0	0	0	0	0	0	0	0	0	0	0	0	0	0	0	0	0	0	0	0	0	0	0	0	0	0
Zotu2451	0	0	0	0	0	0	0	0	0	0	0	0	0	0	0	0	0	0	0	0	0	0	0	0	0	0	0	0	0	0	0	0	0	0	0	0	0	0	0	0	0	0	0	0	0	0	0	0	0
Zotu2452	0	0	0	0	0	0	0	0	0	0	0	0	0	0	0	0	0	0	0	0	0	0	0	0	0	0	0	0	0	0	0	0	0	0	0	0	0	0	0	0	0	0	0	0	0	0	0	0	0
Zotu2453	0	0	0	0	0	0	0	0	0	0	0	0	0	0	0	0	0	0	0	0	0	0	0	0	0	0	0	0	0	0	0	0	0	0	0	0	0	0	0	0	0	0	0	0	0	0	0	0	0
Zotu2454	0	0	0	0	0	0	0	0	0	0	0	0	0	0	0	0	0	0	0	0	0	0	0	0	0	0	0	0	0	0	0	0	0	0	0	0	0	0	0	0	2	0	0	0	0	0	0	0	0
Zotu2455	0	0	0	0	0	0	0	0	0	0	0	0	0	0	0	0	0	0	0	0	0	0	0	0	0	0	0	0	0	0	0	0	0	0	0	0	0	0	0	0	0	0	0	0	0	0	0	0	0
Zotu2456	0	0	0	0	0	0	0	0	0	0	0	0	0	0	0	0	0	0	0	0	0	0	0	0	0	0	0	0	0	0	0	0	0	0	0	0	0	0	0	0	0	0	0	0	0	0	0	0	0
Zotu2457	0	0	0	0	0	0	0	0	0	0	0	0	0	0	0	0	0	0	0	0	0	0	0	0	0	0	0	0	0	0	0	0	0	0	0	0	0	0	0	0	0	0	0	0	0	0	0	0	0
Zotu2458	0	0	0	0	0	0	0	0	0	0	0	0	0	0	0	0	0	0	0	0	0	0	0	0	0	0	0	0	0	0	0	0	0	0	0	0	0	0	0	0	0	0	0	0	0	0	0	0	0
Zotu2459	0	0	0	0	0	0	0	0	0	0	0	0	0	0	0	0	0	0	0	0	0	0	0	0	0	0	0	0	0	0	0	0	0	0	0	0	0	0	0	0	0	0	0	0	0	0	0	0	0
Zotu246	0	0	0	0	0	0	0	0	0	0	0	0	0	0	0	0	0	0	0	0	0	0	0	0	0	0	0	0	0	0	0	0	0	0	0	0	0	0	0	0	0	0	0	0	0	0	0	0	0
Zotu2460	0	0	0	0	0	0	0	0	0	0	0	0	0	0	0	0	0	0	0	0	0	0	0	0	0	0	0	0	0	0	0	0	0	0	0	0	0	0	0	0	0	0	0	0	0	0	0	0	0
Zotu2461	0	0	0	0	0	0	0	0	0	0	0	0	0	0	0	0	0	0	0	0	0	0	0	0	0	0	0	0	0	0	0	0	0	0	0	0	0	0	0	0	0	0	0	0	0	0	0	0	0
Zotu2462	0	0	0	0	0	0	0	0	0	0	0	0	0	0	0	0	0	0	0	0	0	0	0	0	0	0	0	0	0	0	0	0	0	0	0	0	0	0	0	0	0	0	0	0	0	0	0	0	0
Zotu2463	0	0	0	0	0	0	0	0	0	0	0	0	0	0	0	0	0	0	0	0	0	0	0	0	0	0	0	0	0	0	0	0	0	0	0	0	0	0	0	0	0	0	0	0	0	0	0	0	0
Zotu2464	0	0	0	0	0	0	0	0	0	0	0	0	0	0	0	0	0	0	0	0	0	0	0	0	0	0	0	0	0	0	0	0	0	0	0	0	0	0	0	0	0	0	0	0	0	0	0	0	0
Zotu2465	0	0	0	0	0	0	0	0	0	0	0	0	0	0	0	0	0	0	0	0	0	0	0	0	0	0	0	0	0	0	0	0	0	0	0	0	0	0	0	0	0	0	0	0	0	0	0	0	0
Zotu2466	0	0	0	0	0	0	0	0	0	0	0	0	0	0	0	0	0	0	0	0	0	0	0	0	0	0	0	0	0	0	0	0	0	0	0	0	0	0	0	0	0	0	0	0	0	0	0	0	0
Zotu2467	0	0	0	0	0	0	0	0	0	0	0	0	0	0	0	0	0	0	0	0	0	0	0	0	0	0	0	0	0	0	0	0	0	0	0	0	0	0	0	0	0	0	0	0	0	0	0	0	0
Zotu2468	0	0	0	0	0	0	0	0	0	0	0	0	0	0	0	0	0	0	0	0	0	0	0	0	0	0	0	0	0	0	0	0	0	0	0	0	0	0	0	0	0	0	0	0	0	0	0	0	0
Zotu2469	0	0	0	0	0	0	0	0	0	0	0	0	0	0	0	0	0	0	0	0	0	0	0	0	0	0	0	0	0	0	0	0	0	0	0	0	0	0	0	0	0	0	0	0	0	0	0	0	0
Zotu247	0	0	256	0	0	0	0	0	0	0	0	0	0	0	0	0	0	17	0	0	0	0	0	0	0	2	0	0	0	0	0	0	0	0	0	0	0	0	0	0	0	0	0	0	0	0	0	0	0
Zotu2470	0	0	0	0	0	0	0	0	0	0	0	0	0	0	0	0	0	0	0	0	0	0	0	0	0	0	0	0	0	0	0	0	0	0	0	0	0	0	0	0	0	0	0	0	0	0	0	0	0
Zotu2471	0	0	0	0	0	0	0	0	0	0	0	0	0	0	0	0	0	0	0	0	0	0	0	0	0	0	0	0	0	0	0	0	0	0	0	0	0	0	0	0	0	0	0	0	0	0	0	0	0
Zotu2472	0	0	0	0	0	0	0	0	0	0	0	0	0	0	0	0	0	1	0	0	0	0	0	0	0	0	0	0	0	0	0	0	0	0	0	0	0	0	0	1	0	0	0	0	0	0	0	0	0
Zotu2473	0	0	0	0	0	0	0	0	0	0	0	0	0	0	0	0	0	0	0	0	0	0	0	0	0	0	0	0	0	0	0	0	0	0	0	0	0	0	0	0	0	0	0	0	0	0	0	0	0
Zotu2474	0	0	0	0	0	0	0	0	0	0	0	0	0	0	0	0	0	0	0	0	0	0	0	0	0	0	0	0	0	0	0	0	0	0	0	0	0	0	0	0	0	0	0	0	0	0	0	0	0
Zotu2475	0	0	0	0	0	0	0	0	0	0	0	0	0	0	0	0	0	0	0	0	0	0	0	0	0	0	0	0	0	0	0	0	0	0	0	0	0	0	0	0	0	0	0	0	0	0	0	0	0
Zotu2476	0	0	0	0	0	0	0	0	0	0	0	0	0	0	0	0	0	0	0	0	0	0	0	0	0	0	0	0	0	0	0	0	0	0	0	0	0	0	0	0	0	0	0	0	0	0	0	0	0
Zotu2477	0	0	0	0	0	0	0	0	0	0	0	0	0	0	0	0	0	0	0	0	0	0	0	0	0	0	0	0	0	0	0	0	0	0	0	0	0	0	0	0	0	0	0	0	0	0	0	0	0
Zotu2478	0	0	0	0	0	0	0	0	0	0	0	0	0	0	0	0	0	0	0	0	0	0	0	0	0	0	0	0	0	0	0	0	0	0	0	0	0	0	0	0	0	0	0	0	0	0	0	0	0
Zotu2479	0	0	0	0	0	0	0	0	0	0	0	0	0	0	0	0	0	0	0	0	0	0	0	0	0	0	0	0	0	0	0	0	0	0	0	0	0	0	0	0	0	0	0	0	0	0	0	0	0
Zotu248	0	0	1	0	0	0	0	0	0	0	1	0	0	0	0	0	0	1	0	0	0	0	0	0	0	0	0	0	0	0	0	0	0	0	0	0	0	0	0	1	0	0	0	0	0	1	0	0	0
Zotu2480	0	0	0	0	0	0	0	0	0	0	0	0	0	0	0	0	0	0	0	0	0	0	0	0	0	0	0	0	0	0	0	0	0	0	0	0	0	0	0	0	0	0	0	0	0	0	0	0	0
Zotu2481	0	0	0	0	0	0	0	0	0	0	0	0	0	0	0	0	0	0	0	0	0	0	0	0	0	0	0	0	0	0	0	0	0	0	0	0	0	0	0	0	0	0	0	0	0	0	0	0	0
Zotu2482	0	0	0	0	0	0	0	0	0	0	0	0	0	0	0	0	0	0	0	0	0	0	0	0	0	0	0	0	0	0	0	0	0	0	0	0	0	0	0	0	0	0	0	0	0	0	0	0	0
Zotu2483	0	0	0	0	0	0	0	0	0	0	0	0	0	0	0	0	0	0	0	0	0	0	0	0	0	0	0	0	0	0	0	0	0	0	0	0	0	0	0	0	0	0	0	0	0	0	0	0	0
Zotu2484	0	0	0	0	0	0	0	0	0	0	0	0	0	0	0	0	0	0	0	0	0	0	0	0	0	0	0	0	0	0	0	0	0	0	0	0	0	0	0	0	0	0	0	0	0	0	0	0	0
Zotu2485	0	0	0	0	0	0	0	0	0	0	0	0	0	0	0	0	0	0	0	0	0	0	0	0	0	0	0	0	0	0	0	0	0	0	0	0	0	0	0	0	0	0	0	0	0	0	0	0	0
Zotu2486	0	0	0	0	0	0	0	0	0	0	0	0	0	0	0	0	0	0	0	0	0	0	0	0	0	0	0	0	0	0	0	0	0	0	0	0	0	0	0	0	0	0	0	0	0	0	0	0	0
Zotu2487	0	0	0	0	0	0	0	0	0	0	0	0	0	0	0	0	0	0	0	0	0	0	0	0	0	0	0	0	0	0	0	0	0	0	0	0	0	0	0	0	0	0	0	0	0	0	0	0	0
Zotu2488	0	0	0	0	0	0	0	0	0	0	0	0	0	0	0	0	0	0	0	0	0	0	0	0	0	0	0	0	0	0	0	0	0	0	0	0	0	0	0	0	0	0	0	0	0	0	0	0	0
Zotu2489	0	0	0	0	0	0	0	0	0	0	0	0	0	0	0	0	0	0	0	0	0	0	0	0	0	0	0	0	0	0	0	0	0	0	0	0	0	0	0	0	0	0	0	0	0	0	0	0	0
Zotu249	0	0	0	0	0	0	0	0	0	0	0	2	0	0	0	0	0	1	0	0	0	0	1	0	0	0	0	0	44	0	0	0	0	0	0	0	0	2	0	0	0	0	0	0	0	0	0	0	0
Zotu2490	0	0	0	0	0	0	0	0	0	0	0	0	0	0	0	0	0	0	0	0	0	0	0	0	0	0	0	0	0	0	0	0	0	0	0	0	0	0	0	0	0	0	0	0	0	0	0	0	0
Zotu2491	0	0	0	0	0	0	0	0	0	0	0	0	0	0	0	0	0	0	0	0	0	0	0	0	0	0	0	0	0	0	0	0	0	0	0	0	0	0	0	0	0	0	0	0	0	0	0	0	0
Zotu2492	0	0	0	0	0	0	0	0	0	0	0	0	0	0	0	0	0	0	0	0	0	0	0	0	0	0	0	0	0	0	0	0	0	0	0	0	0	0	0	0	0	0	0	0	0	0	0	0	0
Zotu2493	0	0	0	0	0	0	0	0	0	0	0	0	0	0	0	0	0	0	0	0	0	0	0	0	0	0	0	0	0	0	0	0	0	0	0	0	0	0	0	0	0	0	0	0	0	0	0	0	0
Zotu2494	0	0	0	0	0	0	0	0	0	0	0	0	0	0	0	0	0	0	0	0	0	0	0	0	0	0	0	0	0	0	0	0	0	0	0	0	0	0	0	0	0	0	0	0	0	0	0	0	0
Zotu2495	0	0	0	0	0	0	0	0	0	0	0	0	0	0	0	0	0	0	0	0	0	0	0	0	0	0	0	0	0	0	0	0	0	0	0	0	0	0	0	0	0	0	0	0	0	0	0	0	0
Zotu2496	0	0	0	0	0	0	0	0	0	0	0	0	0	0	0	0	0	0	0	0	0	0	0	0	0	0	0	0	0	0	0	0	0	0	0	0	0	0	14	0	0	0	0	0	0	0	0	0	0
Zotu2497	0	0	0	0	0	0	0	0	0	0	0	0	0	0	0	0	0	0	0	0	0	0	1	0	0	0	0	0	0	0	0	0	0	0	0	0	0	0	0	0	0	0	0	0	0	0	0	0	0
Zotu2498	0	0	0	0	0	0	0	0	0	0	0	0	0	0	0	0	0	0	0	0	0	0	0	0	0	0	0	0	0	0	0	0	0	0	0	0	0	0	0	0	0	0	0	0	0	0	0	0	0
Zotu2499	0	0	0	0	0	0	0	0	0	0	0	0	0	0	0	0	0	0	0	0	0	0	0	0	0	0	0	0	0	0	0	0	0	0	0	0	0	0	0	0	0	0	0	0	0	0	0	0	0
Zotu25	622	0	417	1	0	0	0	2	0	0	0	0	0	1	0	0	0	32	0	0	1	0	0	0	0	0	0	1	146	0	0	2	0	0	1	0	0	0	0	0	0	0	0	1	0	0	0	1	0
Zotu250	0	1501	0	0	0	0	0	0	0	0	0	1	0	12	0	0	0	0	0	0	0	0	0	0	2	0	0	0	1	0	0	0	0	0	0	0	0	0	0	7	1	0	0	0	0	0	0	0	0
Zotu2500	0	0	0	0	0	0	0	0	0	0	0	0	0	0	0	0	0	0	0	0	0	0	0	0	0	0	0	0	0	0	0	0	0	0	0	0	0	0	0	0	0	0	0	0	0	0	0	0	0
Zotu2501	0	0	0	0	0	0	0	0	0	0	0	0	0	0	0	0	0	0	0	0	0	0	0	0	0	0	0	0	0	0	0	0	0	0	0	0	0	0	0	0	0	0	0	0	0	0	0	0	0
Zotu2502	0	0	0	0	0	0	0	0	0	92	0	4	0	0	0	0	0	0	0	0	1	0	5	0	0	0	0	1	0	0	0	0	0	0	0	0	0	3	0	0	0	0	0	1	0	3	0	0	0
Zotu2503	0	0	0	0	0	0	0	0	0	0	0	0	0	0	0	0	0	0	0	0	0	0	9	0	0	0	0	0	0	0	0	0	0	0	0	0	0	0	0	0	0	0	0	0	0	0	0	0	0
Zotu2504	0	0	0	0	0	0	0	0	0	0	0	0	0	0	0	0	0	0	0	0	0	0	0	0	0	0	0	0	0	0	0	0	0	0	0	0	0	0	0	0	0	0	0	0	0	0	0	0	0
Zotu2505	0	0	0	0	0	0	0	0	0	0	0	0	0	0	0	0	0	0	0	0	0	0	0	0	0	0	0	0	0	0	0	0	0	0	0	0	0	0	0	0	0	0	0	0	0	0	0	0	0
Zotu2506	0	0	0	0	0	0	0	0	0	0	0	0	0	0	0	0	23	0	0	0	0	0	0	0	0	0	0	0	0	0	0	0	5	0	0	0	0	0	0	0	0	0	0	0	1	0	0	0	0
Zotu2507	0	0	0	0	0	0	0	0	0	2	0	0	0	0	0	0	1	2	0	0	0	0	0	0	0	0	0	0	0	0	0	0	2	0	0	0	0	0	0	0	0	0	0	0	0	0	0	0	0
Zotu2508	0	0	0	0	0	0	0	0	0	0	0	0	0	0	0	0	0	0	0	0	0	0	0	0	0	0	0	0	0	0	0	0	0	0	0	0	0	0	0	0	0	0	0	0	0	0	0	0	0
Zotu2509	0	0	0	0	0	0	0	0	0	0	0	0	0	0	0	0	0	0	0	0	0	0	0	0	0	0	0	0	0	0	0	0	0	0	0	0	0	0	0	0	0	0	0	0	0	0	0	0	0
Zotu251	0	0	2	0	0	0	0	0	0	0	1	0	2	0	0	0	1	0	0	0	0	0	0	0	0	0	0	0	0	0	0	0	0	0	0	0	2	0	0	0	0	0	1	0	0	0	0	0	0
Zotu2510	0	0	0	0	0	0	0	0	0	0	0	0	0	0	0	0	0	0	0	0	0	0	0	0	0	0	0	0	0	0	0	0	0	0	0	0	0	0	0	0	0	0	0	0	0	0	0	0	0
Zotu2511	0	0	0	0	0	0	0	0	0	0	0	0	0	0	0	0	0	0	0	0	0	0	0	0	0	0	0	0	0	0	0	0	0	0	0	0	0	0	0	0	0	0	0	0	0	0	0	0	0
Zotu2512	0	0	0	0	0	0	0	0	0	0	0	0	0	0	0	0	0	0	0	0	0	0	0	0	0	0	0	0	0	0	0	0	0	0	0	0	0	0	0	0	0	0	0	0	0	0	0	0	0
Zotu2513	0	0	0	0	0	0	0	0	0	0	0	0	0	0	0	0	0	0	0	0	0	0	0	0	0	0	0	0	0	0	0	0	0	0	0	0	0	0	0	0	0	0	0	0	0	0	0	0	0
Zotu2514	6	0	0	0	0	0	0	0	0	5	0	0	0	0	0	0	0	2	0	0	0	0	0	0	0	0	0	1	0	0	0	0	3	0	0	0	0	0	0	1	9	1	0	0	0	0	0	0	0
Zotu2515	0	0	0	0	0	0	0	0	0	0	0	0	0	0	0	0	0	0	0	0	0	0	0	0	0	0	0	0	0	0	0	0	0	0	0	0	0	0	0	0	0	0	0	0	0	0	0	0	0
Zotu2516	0	0	0	0	0	0	0	0	0	0	0	0	0	0	0	0	0	0	0	0	0	0	0	0	0	0	0	0	0	0	0	0	0	0	0	0	0	0	0	0	0	0	0	0	0	0	0	0	0
Zotu2517	0	0	0	0	0	0	0	0	0	0	0	0	0	0	0	0	0	0	0	0	0	0	0	0	0	0	0	0	0	0	0	0	0	0	0	0	0	0	0	0	0	0	0	0	0	0	0	0	0
Zotu2518	0	0	0	0	0	0	0	0	0	0	0	0	0	0	0	0	0	0	0	0	0	0	0	0	0	0	0	0	0	0	0	0	0	0	0	0	0	0	0	0	0	0	0	0	0	0	0	0	0
Zotu2519	0	0	0	0	0	0	0	0	0	0	0	0	0	0	0	0	0	0	0	0	0	0	0	0	0	0	0	0	0	0	0	0	0	0	0	0	0	0	0	0	0	0	0	0	0	0	0	0	0
Zotu252	2	0	0	0	0	0	0	0	0	0	0	0	0	0	0	27	0	0	0	0	0	0	0	0	0	0	0	0	0	2	0	0	0	0	0	0	0	0	0	0	0	0	0	0	15	0	0	0	0
Zotu2520	0	0	0	0	0	0	0	0	0	0	0	0	0	0	0	0	0	0	0	0	0	0	0	0	0	0	0	0	0	0	0	0	0	0	0	0	0	0	0	0	0	0	0	0	0	0	0	0	0
Zotu2521	0	0	0	0	0	0	0	0	0	0	0	0	0	0	0	0	0	0	0	0	0	0	0	0	0	0	0	0	0	0	0	0	0	0	0	0	0	1	0	0	0	0	0	0	0	0	0	0	0
Zotu2522	0	0	0	0	0	0	0	0	0	0	0	0	0	0	0	0	0	0	0	0	0	0	0	0	0	0	0	0	9	0	0	0	0	0	0	0	0	0	0	0	0	0	0	0	0	0	0	0	0
Zotu2523	0	0	0	0	0	1	0	0	0	0	0	0	0	0	0	0	0	0	0	0	0	0	0	0	0	0	0	0	0	0	0	0	0	0	0	0	0	0	0	0	0	0	0	0	0	0	0	0	0
Zotu2524	0	0	0	0	0	0	0	0	0	0	0	0	0	0	0	0	0	0	0	0	0	0	0	0	0	0	0	0	0	0	0	0	0	0	0	0	0	0	0	0	0	0	0	0	0	0	0	0	0
Zotu2525	0	0	0	0	0	0	0	0	0	0	0	0	0	0	0	0	0	0	0	0	0	0	0	0	0	0	0	0	0	0	0	0	0	0	0	0	0	0	0	0	0	0	0	0	0	0	0	0	0
Zotu2526	0	0	0	0	0	0	0	0	0	0	0	0	0	0	0	0	0	0	0	0	0	0	0	0	0	0	0	0	0	0	0	0	0	0	0	0	0	0	0	0	0	0	0	0	0	0	0	0	0
Zotu2527	0	0	0	0	0	0	0	0	0	0	0	0	0	0	0	0	0	0	0	0	0	0	0	0	0	0	0	0	0	0	0	0	0	0	0	0	0	0	0	0	0	0	0	0	0	0	0	0	0
Zotu2528	0	0	0	0	0	0	0	0	0	0	0	0	0	0	0	0	0	0	0	0	0	0	0	0	0	0	0	0	0	0	0	0	0	0	0	0	0	0	0	0	0	0	0	0	0	0	0	0	0
Zotu2529	0	0	0	0	0	0	0	0	0	0	0	0	0	0	0	0	0	0	0	0	0	0	0	0	0	0	0	0	0	0	0	0	0	0	0	0	0	0	0	0	0	0	0	0	0	0	0	0	0
Zotu253	1	0	0	0	0	0	0	0	0	0	0	0	0	0	0	0	0	0	0	0	0	0	0	2	0	2	0	0	0	0	0	0	0	0	0	0	0	0	0	0	0	0	0	0	0	2	0	0	0
Zotu2530	0	0	0	0	0	0	0	0	0	0	0	0	0	0	0	0	0	0	0	0	0	0	0	0	0	0	0	0	0	0	0	0	0	0	0	0	0	0	0	0	0	0	0	0	0	0	0	0	0
Zotu2531	0	0	0	0	0	0	0	0	0	0	0	0	0	0	0	0	0	0	0	0	0	0	0	0	0	0	0	0	0	0	0	0	0	0	0	0	0	0	0	0	0	0	0	0	0	0	0	0	0
Zotu2532	0	0	0	0	0	0	0	0	0	0	0	0	0	0	0	0	0	2	0	0	0	0	0	0	0	0	0	0	0	0	0	0	0	0	0	0	0	0	0	0	0	0	0	0	0	0	0	0	0
Zotu2533	0	0	0	0	0	0	0	0	0	0	0	0	0	0	0	0	0	0	0	0	0	0	0	0	0	0	0	0	0	0	0	0	0	0	0	0	0	0	0	0	0	0	0	0	0	0	0	0	0
Zotu2534	0	0	0	0	0	0	0	0	0	0	0	0	0	0	0	0	0	0	0	0	0	0	0	0	0	0	0	0	0	0	0	0	0	0	0	0	0	0	0	0	0	0	0	0	0	0	0	0	0
Zotu2535	0	0	0	0	0	0	0	0	0	0	0	0	0	0	0	0	0	0	0	0	0	0	0	0	0	0	0	0	1	0	0	0	0	0	0	0	0	0	0	0	0	0	0	0	0	0	0	0	0
Zotu2536	0	0	0	0	0	0	0	0	0	0	0	0	0	0	0	0	0	0	0	0	0	0	0	0	0	0	0	0	0	0	0	0	0	0	0	0	0	0	0	0	0	0	0	0	0	0	0	0	0
Zotu2537	0	0	0	0	0	0	0	0	0	0	0	0	0	0	0	0	0	0	0	0	0	0	0	0	0	0	0	0	0	0	0	0	0	0	0	0	0	0	0	0	0	0	0	0	0	0	0	0	0
Zotu2538	0	0	0	0	0	0	0	0	0	0	0	0	0	0	0	0	0	0	0	0	0	0	0	0	0	0	0	0	0	0	0	0	0	0	0	0	0	0	0	0	0	0	0	0	0	0	0	0	0
Zotu2539	0	0	0	0	0	0	0	0	0	0	0	0	0	0	0	0	0	0	0	0	0	0	0	0	0	0	0	0	0	0	0	0	0	0	0	0	0	0	0	0	0	0	0	0	0	0	0	0	0
Zotu254	0	0	0	0	2	3096	0	0	0	0	0	0	0	1	0	2	0	0	0	0	0	0	0	0	0	0	0	0	0	0	0	0	0	0	0	0	0	0	1	0	0	0	0	0	0	0	0	0	0
Zotu2540	0	0	0	0	0	0	0	0	0	0	0	0	0	0	0	0	0	0	0	0	0	0	0	0	0	0	0	0	0	0	0	0	0	0	0	0	0	0	0	0	0	0	0	0	0	0	0	0	0
Zotu2541	0	0	0	0	0	0	0	0	0	0	0	0	0	0	0	0	0	0	0	0	0	0	0	0	0	0	1	0	0	0	0	0	0	0	0	0	0	0	0	0	0	0	0	28	0	0	0	0	0
Zotu2542	0	0	0	0	0	0	0	0	0	0	0	0	9	0	0	0	0	0	0	0	0	0	0	0	0	0	0	0	0	0	0	0	0	15	0	0	0	0	0	0	0	0	10	0	0	0	0	6	0
Zotu2543	0	0	0	0	0	0	0	0	0	0	0	0	0	0	0	0	0	0	0	0	0	0	0	0	0	0	0	0	0	0	0	0	0	0	0	0	0	0	0	0	29	0	0	0	0	0	0	0	0
Zotu2544	0	0	0	0	0	0	0	0	0	0	0	0	0	0	0	0	0	0	0	0	0	0	0	0	0	0	0	0	0	0	0	0	0	0	0	0	0	0	0	0	0	0	0	0	0	0	0	0	0
Zotu2545	0	0	0	0	0	0	0	0	0	0	0	0	0	0	0	0	0	0	0	0	0	0	0	0	0	0	0	0	0	0	0	0	0	0	0	0	0	0	0	0	0	0	0	0	0	0	0	0	0
Zotu2546	0	0	0	0	0	0	0	0	0	0	0	0	0	0	0	0	0	0	0	0	0	0	0	0	0	0	0	0	0	0	0	0	0	0	0	0	0	0	0	0	0	0	0	0	0	0	0	0	0
Zotu2547	0	0	0	0	0	0	0	0	0	0	0	0	0	0	0	0	0	0	0	0	0	0	0	0	0	0	0	0	0	0	0	0	0	0	0	0	0	0	0	0	0	0	0	0	0	0	0	0	0
Zotu2548	0	0	0	0	0	0	0	0	0	0	0	0	0	0	0	0	0	0	0	0	0	0	0	0	0	0	0	0	0	0	0	0	0	0	0	0	0	0	0	0	0	0	0	0	0	0	0	0	0
Zotu2549	0	0	0	0	0	0	2	0	0	0	0	0	1	0	0	0	0	0	0	1	0	0	0	0	0	0	0	0	0	0	0	0	0	3	0	0	0	0	0	0	0	0	0	0	0	0	0	0	0
Zotu255	0	0	0	0	0	0	0	0	0	0	0	0	0	0	0	0	0	15	0	0	0	0	0	0	0	0	0	0	0	0	0	0	0	0	0	0	0	1	0	0	0	0	0	0	0	0	0	0	0
Zotu2550	0	0	0	0	0	0	0	0	0	0	0	0	0	0	0	0	0	0	0	0	0	0	0	0	0	0	1	0	0	0	0	0	0	0	0	0	0	0	0	0	0	0	0	0	0	0	0	0	0
Zotu2551	0	0	0	0	0	0	0	0	0	0	0	0	0	0	0	0	0	0	0	0	0	0	0	0	0	0	0	0	0	0	0	0	0	0	0	0	0	0	0	0	0	0	0	0	0	0	0	0	0
Zotu2552	0	0	0	0	0	0	0	0	0	0	0	0	0	0	0	0	0	0	0	0	0	0	0	0	0	0	0	0	0	0	0	0	0	0	0	0	0	0	0	0	0	0	0	0	0	0	0	0	0
Zotu2553	0	0	0	0	0	0	0	0	0	0	0	0	0	0	0	0	0	0	0	0	0	0	0	0	0	0	0	0	0	0	0	0	0	0	0	0	0	0	0	0	0	0	0	0	0	0	0	0	0
Zotu2554	0	0	0	0	0	0	0	0	0	0	0	0	0	0	0	0	0	0	0	0	0	0	0	0	0	0	0	0	0	0	0	0	0	0	0	0	0	0	0	0	0	0	0	0	0	0	0	0	0
Zotu2555	0	0	0	0	0	0	0	0	0	0	0	0	0	0	0	0	0	0	0	0	0	0	0	0	0	0	0	0	0	0	0	0	0	0	0	0	0	0	0	0	0	0	0	0	0	0	0	0	0
Zotu2556	0	0	0	0	0	0	0	0	0	0	0	0	0	0	0	0	0	0	0	0	0	0	0	0	0	0	0	0	0	0	0	0	0	0	0	0	0	0	0	0	0	0	0	0	0	0	0	0	0
Zotu2557	0	0	0	0	0	0	0	0	0	0	0	0	0	0	0	0	0	0	0	0	0	0	0	0	0	0	0	0	0	0	0	0	0	0	0	0	0	0	0	0	0	0	0	0	0	0	0	0	0
Zotu2558	0	0	0	0	0	0	0	0	0	0	0	0	0	0	0	0	0	0	0	0	0	0	0	0	0	0	0	0	0	0	0	0	0	0	0	0	0	0	0	0	0	0	0	0	0	0	0	0	0
Zotu2559	0	0	0	0	0	0	0	0	0	0	0	0	0	0	0	0	0	0	0	0	0	0	0	0	0	0	0	0	0	0	0	0	0	0	0	0	0	0	0	0	0	0	0	0	0	0	0	0	0
Zotu256	0	0	0	0	0	0	0	0	0	0	0	0	0	0	0	0	0	0	0	0	0	0	0	0	0	0	0	0	0	0	0	0	0	0	0	0	0	1	0	0	0	0	0	0	0	0	0	0	0
Zotu2560	0	0	0	0	0	0	0	0	0	0	0	0	0	0	0	0	0	0	0	0	0	0	0	0	0	0	0	0	0	0	0	0	0	0	0	0	0	0	0	0	0	0	0	0	0	0	0	0	0
Zotu2561	0	0	0	0	0	0	0	0	0	0	0	0	0	0	0	0	0	0	0	0	0	0	0	0	0	0	0	0	0	0	0	0	0	0	0	0	0	0	0	0	0	0	0	0	0	0	0	0	0
Zotu2562	0	0	0	0	0	0	0	0	0	0	0	0	0	0	0	0	0	0	0	0	0	0	0	0	0	0	0	0	0	0	0	0	0	0	0	0	0	0	0	0	0	0	0	0	0	0	0	0	0
Zotu2563	0	0	0	0	0	0	0	0	0	0	0	0	0	0	0	0	0	0	0	0	0	0	0	0	0	0	0	0	0	0	0	0	0	0	0	0	0	0	0	0	0	0	0	0	0	0	0	0	0
Zotu2564	0	0	0	0	0	0	0	0	0	0	0	0	0	0	0	0	0	0	0	0	0	0	0	0	0	0	0	0	0	0	0	0	0	0	0	0	0	0	0	0	0	0	0	0	0	0	0	0	0
Zotu2565	0	0	0	0	0	0	0	0	0	0	0	0	0	0	0	0	0	0	0	0	0	0	0	0	0	0	0	0	0	0	0	0	0	0	0	0	0	0	0	0	0	0	0	0	0	0	0	0	0
Zotu2566	0	0	0	0	0	0	0	0	0	0	0	0	0	0	0	0	0	0	0	0	0	0	0	0	0	0	0	0	0	0	0	0	0	0	0	0	0	0	0	0	0	0	0	0	0	0	0	0	0
Zotu2567	0	0	0	0	0	0	0	0	0	0	0	0	0	0	0	0	0	0	0	0	0	0	0	0	0	0	0	0	0	0	0	0	0	0	0	0	0	0	0	0	0	0	0	0	0	0	0	0	0
Zotu2568	0	0	0	0	0	0	0	0	0	0	0	0	1	0	0	0	0	0	0	0	0	0	0	0	0	0	0	0	0	0	0	0	21	25	0	0	0	0	0	0	0	2	0	2	0	0	0	2	0
Zotu2569	0	0	0	0	0	0	0	0	0	0	0	0	0	0	0	0	0	0	0	0	0	0	0	0	0	0	0	0	0	0	0	0	0	0	0	0	0	0	0	0	0	0	0	0	0	0	0	0	0
Zotu257	0	0	5	0	0	0	0	0	0	0	0	0	0	0	1	0	0	0	0	0	0	0	0	0	0	0	0	0	0	0	0	0	0	0	0	0	0	0	0	0	0	0	0	0	0	0	0	0	0
Zotu2570	0	0	0	0	0	0	0	0	0	0	0	0	0	1	0	104	0	1	0	0	0	0	0	0	0	0	1	0	0	0	0	0	0	0	0	0	0	0	0	0	0	0	0	0	0	0	0	0	0
Zotu2571	0	0	0	0	0	0	0	0	0	0	0	0	0	0	0	0	0	0	0	0	0	0	0	0	0	0	0	0	0	0	0	0	0	0	0	0	0	0	0	0	0	0	0	0	0	0	0	0	0
Zotu2572	0	0	0	0	0	0	0	0	0	0	0	0	0	0	0	0	0	0	0	0	0	0	0	0	0	0	0	0	0	0	0	0	0	0	0	0	0	0	0	0	0	0	0	0	0	0	0	0	0
Zotu2573	2	0	0	0	0	0	0	0	0	0	0	0	0	0	0	0	0	0	0	0	0	0	0	0	0	0	0	0	0	0	0	0	0	0	0	0	0	0	0	0	0	0	0	0	0	0	0	0	0
Zotu2574	0	0	26	0	0	0	0	0	0	0	0	0	0	0	0	0	0	0	0	0	0	0	0	0	0	0	0	0	0	0	0	0	0	0	0	0	0	0	0	0	0	0	0	0	0	0	0	0	0
Zotu2575	0	0	0	0	0	0	0	0	0	0	0	0	0	0	0	0	0	0	0	0	0	0	0	0	0	0	0	0	0	0	0	0	0	0	0	0	0	0	0	0	0	0	0	0	0	0	0	0	0
Zotu2576	0	0	0	0	0	0	0	0	0	0	0	0	0	0	0	0	0	0	0	0	0	0	0	0	0	0	0	0	0	0	0	0	0	0	0	0	0	0	0	0	0	0	0	0	0	0	0	0	0
Zotu2577	0	0	0	0	0	0	0	0	0	0	0	0	0	0	0	0	0	0	0	0	0	0	0	0	0	0	0	0	0	0	0	0	0	0	0	0	0	0	0	0	0	0	0	0	0	0	0	0	0
Zotu2578	0	0	0	0	0	0	0	0	0	0	0	0	0	0	0	0	0	0	0	0	0	0	0	0	0	0	0	0	0	0	0	0	0	0	0	0	0	0	0	0	0	0	0	0	0	0	0	0	0
Zotu2579	0	0	0	0	0	0	0	0	0	0	0	0	0	0	0	0	0	0	0	0	0	0	0	0	0	0	0	0	0	0	0	0	0	0	0	0	0	0	0	0	0	0	0	0	0	0	0	0	0
Zotu258	0	0	0	0	0	4	0	0	0	0	0	0	0	0	0	0	0	0	0	0	0	0	0	0	0	0	0	0	0	0	0	0	0	0	0	0	0	0	2	0	0	0	0	0	0	298	0	0	0
Zotu2580	0	0	0	0	0	0	0	0	0	0	0	0	0	0	0	0	0	0	0	0	0	0	0	0	0	0	0	0	0	0	0	0	0	0	0	0	0	0	0	0	0	0	0	0	0	0	0	0	0
Zotu2581	0	0	0	0	0	0	0	0	0	0	0	0	0	0	0	0	0	0	0	0	0	0	0	0	0	0	0	0	0	0	0	0	0	0	0	0	0	0	0	0	0	0	0	0	0	0	0	0	0
Zotu2582	0	0	0	0	0	0	0	0	0	0	0	0	0	0	0	0	0	0	0	0	0	0	0	0	0	0	0	0	0	0	0	0	0	0	0	0	0	0	0	0	0	0	0	0	0	0	0	0	0
Zotu2583	0	0	0	0	0	0	0	0	0	0	0	0	0	0	0	0	0	0	0	0	0	0	0	0	0	0	0	0	0	0	0	0	0	0	0	0	0	0	0	0	0	0	0	0	0	0	0	0	0
Zotu2584	0	0	0	0	0	0	0	0	0	0	0	0	0	0	0	0	0	0	0	0	0	0	0	0	0	0	0	0	1	0	0	0	0	0	0	0	0	0	0	0	0	0	0	0	0	0	0	0	0
Zotu2585	0	0	0	0	0	0	0	0	0	0	0	0	0	0	0	0	0	0	0	0	0	0	3	0	0	0	0	5	0	0	0	0	0	0	0	0	0	0	0	0	0	0	0	0	0	0	0	4	0
Zotu2586	0	0	0	0	0	0	0	0	0	0	0	0	0	0	0	0	0	0	0	0	0	0	0	0	0	0	0	0	0	0	0	0	0	0	0	0	0	0	0	0	0	0	0	0	0	0	0	0	0
Zotu2587	0	0	0	0	0	0	0	0	0	0	0	0	0	0	0	0	0	0	0	0	0	0	0	0	0	0	0	0	0	0	0	0	0	0	0	0	0	0	0	0	0	0	0	0	0	0	0	0	0
Zotu2588	0	0	0	0	0	0	0	0	0	0	0	0	0	0	0	0	0	0	0	0	0	0	0	0	0	0	0	0	0	0	0	0	0	0	0	0	0	0	0	0	0	0	0	0	0	0	0	0	0
Zotu2589	0	0	0	0	0	0	0	0	0	0	0	0	0	0	0	0	0	0	0	0	0	0	0	0	0	0	0	0	0	0	0	0	0	0	0	0	0	0	0	0	0	0	0	0	0	0	0	0	0
Zotu259	0	0	0	0	0	0	0	0	0	0	0	0	0	2	0	0	0	0	0	0	0	0	0	0	0	0	0	0	0	0	0	0	0	0	0	0	0	0	0	0	0	0	0	0	0	0	0	0	0
Zotu2590	0	0	0	0	0	0	0	0	0	0	0	0	0	0	0	0	0	0	0	0	0	0	0	0	0	0	0	0	0	0	0	0	0	0	0	0	0	0	0	0	0	0	0	0	0	0	0	0	0
Zotu2591	0	0	0	0	0	0	0	0	0	0	0	0	0	0	0	0	0	0	0	0	0	0	0	0	0	0	0	0	0	0	0	0	0	0	0	0	0	0	0	0	0	0	0	0	0	0	0	0	0
Zotu2592	0	1	0	0	0	0	0	0	0	0	0	0	0	0	0	0	0	0	0	0	0	0	0	0	0	0	0	0	0	0	0	0	0	0	0	0	0	0	0	0	0	0	0	0	0	0	0	0	0
Zotu2593	0	0	0	0	0	0	0	0	0	0	0	0	0	0	0	0	0	0	0	0	0	0	0	0	0	0	0	2	0	0	0	0	0	0	0	0	0	0	0	0	0	0	0	0	0	0	0	0	0
Zotu2594	0	0	0	0	0	0	0	0	0	23	0	0	0	0	0	0	0	0	0	0	0	0	0	0	0	0	0	0	0	0	0	0	0	0	0	0	0	0	0	0	0	0	0	0	0	0	0	0	0
Zotu2595	0	0	0	0	0	0	0	0	0	0	0	0	0	0	0	0	0	0	0	0	0	0	0	0	0	0	0	0	0	0	0	0	0	0	0	0	0	0	0	0	0	0	0	0	0	0	0	0	0
Zotu2596	0	0	0	0	0	0	0	0	0	0	0	0	0	0	0	0	0	0	0	0	0	0	0	0	0	0	0	0	0	0	0	0	0	0	0	0	0	0	0	0	0	0	0	0	0	0	0	0	0
Zotu2597	0	0	0	0	0	0	0	0	0	0	0	0	0	0	0	0	0	0	0	0	0	0	0	0	0	0	0	0	0	0	0	0	0	0	0	0	0	0	0	0	0	0	0	0	0	0	0	0	0
Zotu2598	0	0	0	0	0	0	0	0	0	0	0	0	0	0	0	0	0	0	0	0	0	0	0	0	0	0	0	0	0	0	0	0	0	0	0	0	0	0	0	0	0	0	0	0	0	0	0	0	0
Zotu2599	0	0	0	0	0	0	0	0	0	0	0	0	0	0	0	0	0	0	0	0	0	0	0	0	0	0	0	0	0	0	0	0	0	0	0	0	0	0	0	0	0	0	0	0	0	0	0	0	0
Zotu26	428	0	1	0	4	0	1	0	0	0	0	0	1	0	0	0	4	25	943	0	0	0	1	1	3	1	3	2	0	0	0	1	1	0	1	0	1	0	0	0	3	526	0	0	0	0	0	0	1
Zotu260	0	0	0	0	0	0	0	0	0	0	0	0	0	0	0	0	0	20	0	0	1	0	0	0	0	0	0	0	0	0	0	0	0	0	0	0	0	0	0	0	0	0	0	0	0	0	0	0	0
Zotu2600	0	0	0	0	0	0	0	0	0	0	0	0	0	0	0	0	0	0	0	0	0	0	0	0	0	0	0	0	0	0	0	0	0	0	0	0	0	0	0	0	0	0	0	0	0	0	0	0	0
Zotu2601	0	0	0	0	0	0	0	0	0	0	0	0	0	0	0	0	0	0	0	0	0	0	0	0	0	0	0	0	0	0	0	0	0	0	0	0	0	0	0	0	0	0	0	0	0	0	0	0	0
Zotu2602	0	0	0	0	0	0	0	0	0	0	0	0	0	0	0	0	0	0	0	0	0	0	0	0	0	0	0	0	0	0	0	0	0	0	0	0	0	0	0	0	0	0	0	0	0	0	0	0	0
Zotu2603	0	0	0	0	0	0	0	0	0	0	0	0	0	0	0	0	0	0	0	0	0	0	0	0	0	0	0	0	0	0	0	0	0	0	0	0	0	0	0	0	0	0	0	0	0	0	0	0	0
Zotu2604	0	0	0	0	0	0	0	0	0	0	0	0	0	0	0	0	0	0	0	0	0	0	0	0	0	0	0	0	0	0	0	0	0	0	0	0	0	0	0	0	0	0	0	0	0	0	0	0	0
Zotu2605	0	0	0	0	0	0	0	0	0	0	0	0	0	0	0	0	0	0	0	0	0	0	0	0	0	0	0	0	0	0	0	0	0	0	0	0	0	0	0	0	0	0	0	0	0	0	0	0	0
Zotu2606	0	0	0	0	0	0	0	0	0	0	0	0	0	0	0	0	0	0	0	0	0	0	0	0	0	0	0	0	0	0	0	0	0	0	0	0	0	0	0	0	0	0	0	0	0	0	0	0	0
Zotu2607	0	0	0	0	0	0	0	0	0	0	0	0	0	0	0	0	0	0	0	0	0	0	0	0	0	0	0	0	0	0	0	0	0	0	0	0	0	0	0	0	0	0	0	0	0	0	0	0	0
Zotu2608	0	0	0	0	0	0	0	0	0	0	0	0	0	0	0	0	0	0	0	0	0	0	0	0	0	0	0	0	0	0	0	0	0	0	0	0	0	0	0	0	0	0	0	0	0	0	0	0	0
Zotu2609	0	0	0	0	0	0	0	0	0	0	0	0	0	0	0	0	0	0	0	0	0	0	0	0	0	0	0	0	0	0	0	0	0	0	0	0	0	0	0	0	0	0	0	0	0	0	0	0	0
Zotu261	0	0	0	0	0	0	0	0	0	0	0	0	1	0	2	0	0	0	0	0	0	0	0	0	0	1	0	0	0	0	0	0	0	2	0	0	0	0	0	0	2	0	0	0	0	0	2	0	1
Zotu2610	0	0	0	0	0	0	0	0	0	0	0	0	0	0	0	0	0	0	0	0	0	0	0	0	0	0	0	0	0	0	0	0	0	0	0	0	0	0	0	0	0	0	0	0	0	0	0	0	0
Zotu2611	0	0	0	0	0	0	0	0	0	0	0	0	0	0	0	0	0	0	0	0	0	0	0	0	0	0	0	0	0	0	0	0	0	0	0	0	0	0	0	0	0	0	0	0	0	0	0	0	0
Zotu2612	0	0	0	0	0	0	0	0	0	0	0	0	0	0	0	0	0	0	0	0	0	0	0	0	0	0	0	0	0	0	0	0	0	0	0	0	0	0	0	0	0	0	0	0	0	0	0	0	0
Zotu2613	0	0	0	0	0	0	0	0	0	0	0	0	0	0	0	0	0	0	0	0	0	0	0	0	0	0	0	0	0	0	0	0	0	0	0	0	0	0	0	0	0	0	0	0	0	0	0	0	0
Zotu2614	0	0	0	0	0	0	0	0	0	0	0	0	0	0	0	0	0	0	0	0	0	0	0	0	0	0	0	0	0	0	0	0	0	0	0	0	0	0	0	0	0	0	0	0	0	0	0	0	0
Zotu2615	0	0	0	0	0	0	0	0	0	0	0	0	0	0	0	0	0	0	0	0	0	0	0	0	0	0	0	0	0	0	0	0	0	0	0	0	0	0	0	0	0	0	0	0	0	0	0	0	0
Zotu2616	0	0	0	0	0	0	0	0	0	0	0	0	0	0	0	0	0	0	0	0	0	0	0	0	0	0	0	0	0	0	0	0	0	0	0	0	0	0	0	0	0	0	0	0	0	0	0	0	0
Zotu2617	0	0	0	0	0	0	0	0	0	0	0	0	0	0	0	0	0	0	0	0	0	0	0	0	0	0	0	0	0	0	0	0	0	0	0	0	0	0	0	0	0	0	0	0	0	0	0	0	0
Zotu2618	0	0	0	0	0	0	0	0	0	0	0	0	0	0	0	0	0	0	0	0	0	0	0	0	0	0	0	0	0	0	0	0	0	0	0	0	0	0	0	0	0	0	0	0	0	0	0	0	0
Zotu2619	0	0	0	0	0	0	0	0	0	0	0	0	0	0	0	0	0	0	0	0	0	0	0	0	0	0	0	0	0	0	0	0	0	0	0	0	0	0	0	0	0	0	0	0	0	0	0	0	0
Zotu262	0	0	0	0	0	0	0	0	0	0	0	0	1	0	0	0	0	2	0	0	0	0	0	0	0	0	0	0	0	0	0	0	1	1	0	0	0	0	0	0	0	0	0	0	0	0	0	0	0
Zotu2620	0	0	0	0	0	0	0	0	0	0	0	0	0	0	0	0	0	1	0	0	0	0	0	0	0	0	0	3	0	0	0	0	0	0	0	0	0	0	0	0	8	0	0	0	0	0	0	0	0
Zotu2621	0	0	0	0	0	0	0	0	0	0	0	0	0	0	0	0	0	0	0	0	0	0	0	0	0	0	0	0	0	0	0	0	0	0	0	0	0	0	0	0	0	0	0	0	0	0	0	0	0
Zotu2622	0	0	0	0	0	0	0	0	0	0	0	0	0	0	0	0	0	0	0	0	0	0	0	0	0	0	0	0	0	0	0	0	0	0	0	0	0	0	0	0	0	0	0	0	0	0	0	0	0
Zotu2623	0	0	0	0	0	0	0	0	0	0	0	0	0	0	0	0	0	0	0	0	0	0	0	0	0	0	0	0	0	0	0	0	0	0	0	0	0	0	0	0	0	0	0	0	0	0	0	0	0
Zotu2624	0	0	0	0	0	0	0	0	0	0	0	0	0	0	0	0	0	0	0	0	0	0	0	0	0	0	0	0	0	0	0	0	0	0	0	0	0	0	0	0	0	0	0	0	0	0	0	0	0
Zotu2625	0	0	0	0	0	0	0	0	0	0	0	0	0	0	0	0	0	0	0	0	0	0	0	0	0	0	0	0	0	0	0	0	0	0	0	0	0	0	0	0	0	0	0	0	0	0	0	0	0
Zotu2626	0	0	0	0	0	0	0	0	0	0	0	0	0	0	0	0	6	0	0	0	0	0	0	0	0	0	0	0	0	0	0	0	3	0	0	0	0	0	0	0	0	0	0	0	0	0	0	0	0
Zotu2627	0	0	0	0	0	0	0	0	0	0	0	0	0	0	0	0	0	0	0	0	0	0	0	0	0	0	0	0	0	0	0	0	0	0	0	0	0	0	0	0	0	0	0	0	0	0	0	0	0
Zotu2628	0	0	0	0	0	0	0	0	0	0	0	0	0	0	0	0	0	0	0	0	0	0	0	0	0	0	0	0	0	0	0	0	0	0	0	0	0	0	0	0	0	0	0	0	0	0	0	0	0
Zotu2629	0	0	0	0	1	0	0	0	0	0	0	0	0	0	0	0	0	0	0	0	0	0	0	0	0	0	0	0	0	0	0	0	0	0	0	0	0	0	0	0	0	0	0	0	0	0	0	0	0
Zotu263	0	0	0	0	0	0	0	0	0	0	0	0	0	0	0	0	0	0	0	0	0	0	0	0	0	0	0	0	0	0	0	0	0	0	0	0	0	0	0	0	0	1	0	0	0	0	0	0	0
Zotu2630	0	0	0	0	0	0	0	0	0	0	0	0	0	0	0	0	0	0	0	0	0	0	0	0	0	0	0	0	0	0	0	0	0	0	0	0	0	0	0	0	0	0	0	0	0	0	0	0	0
Zotu2631	0	0	0	0	0	0	0	0	0	0	0	0	0	0	0	0	0	0	0	0	0	0	0	0	0	0	0	0	0	0	0	0	0	0	0	0	0	0	0	0	0	0	0	0	0	0	0	0	0
Zotu2632	0	0	0	0	0	0	0	0	0	0	0	0	0	0	0	0	0	0	0	0	0	0	0	0	0	0	0	0	0	0	0	0	0	0	0	0	0	0	0	0	0	0	0	0	0	0	0	0	0
Zotu2633	0	0	0	0	0	0	0	0	0	0	0	0	0	0	0	0	0	0	0	0	0	0	0	0	0	0	0	0	0	0	0	0	0	0	0	0	0	0	0	0	0	0	0	0	0	0	0	0	0
Zotu2634	0	0	0	0	0	0	0	0	0	0	0	0	0	0	0	0	0	0	0	0	0	0	0	0	0	0	0	0	0	0	0	0	0	0	0	0	0	0	0	0	0	0	0	0	0	0	0	0	0
Zotu2635	0	0	0	0	0	0	0	0	0	0	0	0	0	0	0	0	0	0	0	0	0	0	0	0	0	0	0	0	0	0	0	0	0	0	0	0	0	0	0	0	0	0	0	0	0	0	0	0	0
Zotu2636	0	0	0	0	0	0	0	0	0	0	0	0	0	0	0	0	0	0	0	0	0	0	0	0	0	0	0	0	0	0	0	0	0	0	0	0	0	0	0	0	0	0	0	0	0	0	0	0	0
Zotu2637	0	0	0	0	0	0	0	0	0	0	0	0	0	0	0	0	0	0	0	0	0	0	0	0	0	0	0	0	0	0	0	0	0	0	0	0	0	0	0	0	0	0	0	0	0	0	0	0	0
Zotu2638	0	0	0	0	0	0	0	0	0	0	0	0	0	0	0	0	0	0	0	0	0	0	0	0	0	0	0	0	0	0	0	0	0	0	0	0	0	0	0	0	0	0	0	0	0	0	0	0	0
Zotu2639	0	0	0	0	0	0	0	0	0	0	0	0	0	0	0	0	0	0	0	0	0	0	0	0	0	0	0	0	0	0	0	0	0	0	0	0	0	0	0	0	0	0	0	0	0	0	0	0	0
Zotu264	0	0	0	0	0	0	0	0	0	0	0	0	0	0	0	0	0	0	0	0	0	0	0	0	0	0	0	0	0	0	0	0	0	0	0	0	0	0	0	0	0	0	0	0	0	0	0	0	0
Zotu2640	0	0	0	0	0	0	0	0	0	0	0	0	0	0	0	0	0	0	0	0	0	0	0	0	0	0	0	0	0	0	0	0	0	0	0	0	0	0	0	0	0	0	0	0	0	0	0	0	0
Zotu2641	0	0	0	0	0	0	0	0	0	0	0	0	0	0	0	0	0	0	0	0	0	0	0	0	0	0	0	0	0	0	0	0	0	0	0	0	0	0	0	0	0	0	0	0	0	0	0	0	0
Zotu2642	0	0	0	0	0	0	0	0	0	0	0	0	0	0	0	0	0	0	0	0	0	0	0	0	0	0	0	0	0	0	0	0	0	0	0	0	0	0	0	0	0	0	0	0	0	0	0	0	0
Zotu2643	0	0	0	0	0	0	0	0	0	0	0	0	0	0	0	0	0	0	0	0	0	0	0	0	0	0	0	0	0	0	0	0	0	0	0	0	0	0	0	0	0	0	0	0	0	0	0	0	0
Zotu2644	0	0	0	0	0	0	0	0	0	0	0	0	0	0	0	0	0	0	0	0	0	0	0	0	0	0	0	0	0	0	0	0	0	0	0	0	0	0	0	0	0	0	0	0	0	0	0	0	0
Zotu2645	0	0	0	0	0	0	0	0	0	0	0	0	0	0	0	0	0	0	0	0	0	0	0	0	0	0	0	0	0	0	0	0	0	0	0	0	0	0	0	0	0	0	0	0	0	0	0	0	0
Zotu2646	0	0	0	0	0	0	0	0	0	0	0	0	0	0	0	0	0	0	0	0	0	0	0	0	0	0	0	0	0	0	0	0	0	0	0	0	0	0	0	0	0	0	0	0	0	0	0	0	0
Zotu2647	0	0	0	0	0	0	0	0	0	0	0	0	0	0	0	0	0	0	0	0	0	0	0	0	0	0	0	0	0	0	0	0	0	0	0	0	0	0	0	0	0	0	0	0	0	0	0	0	0
Zotu2648	0	0	0	0	0	0	0	0	0	0	0	0	0	0	0	0	0	0	0	0	0	0	0	0	0	0	0	0	0	0	0	0	0	0	0	0	0	0	0	0	0	0	0	0	0	0	0	0	0
Zotu2649	0	0	0	0	1	0	0	4	5	0	0	0	0	0	0	0	0	0	2	0	0	0	0	0	0	0	0	0	0	0	0	0	0	13	0	0	0	1	0	0	0	0	0	0	0	2	3	4	0
Zotu265	0	0	0	0	0	1	0	0	0	0	0	0	0	0	0	0	0	0	0	0	0	0	0	0	0	0	0	0	0	0	0	0	0	0	0	0	0	0	0	0	0	0	0	0	0	0	0	0	0
Zotu2650	0	0	0	0	0	0	0	0	0	0	0	0	0	0	0	0	0	0	0	0	0	0	0	0	0	0	0	0	0	0	0	0	0	0	0	0	0	0	0	0	0	0	0	0	0	0	0	0	0
Zotu2651	0	0	0	0	0	0	0	0	0	0	0	0	0	0	0	0	0	0	0	0	0	0	0	0	0	0	0	0	6	0	0	0	0	0	0	0	0	0	0	0	0	0	0	0	0	0	0	0	0
Zotu2652	0	0	0	0	0	0	0	0	0	0	0	0	0	0	0	0	0	0	0	0	0	0	0	0	0	0	0	0	0	0	0	0	0	0	0	0	0	0	0	0	0	0	0	0	0	0	0	0	0
Zotu2653	0	0	0	0	1	0	0	0	0	0	0	0	0	0	0	0	0	0	0	0	0	0	0	0	0	0	0	0	0	0	0	0	0	0	0	0	0	0	0	0	0	0	0	0	0	0	0	0	0
Zotu2654	0	0	0	0	0	0	0	0	0	0	0	0	0	0	0	0	0	0	0	0	0	0	0	0	0	0	0	0	0	0	0	0	0	0	0	0	0	0	0	0	0	0	0	0	0	0	0	0	0
Zotu2655	0	0	0	0	0	0	0	0	0	0	0	0	0	0	0	0	0	0	0	0	0	0	0	0	0	0	0	0	0	0	0	0	0	0	0	0	0	0	0	0	0	0	0	0	0	0	0	0	0
Zotu2656	0	0	0	0	0	0	0	0	0	0	0	0	0	0	0	0	0	0	0	0	0	0	0	0	0	0	0	4	0	0	0	0	0	0	0	0	0	0	0	0	0	0	0	0	0	0	0	0	0
Zotu2657	0	0	0	0	0	0	0	0	0	0	0	0	0	0	0	0	0	0	0	0	0	0	0	0	0	0	0	0	0	0	0	0	0	0	0	0	0	0	0	0	0	0	0	0	0	0	0	0	0
Zotu2658	0	0	0	0	0	2	0	0	0	0	0	0	1	0	0	0	3	0	1	0	0	0	0	0	0	0	0	0	0	0	0	0	0	0	0	0	0	1	0	0	0	0	0	0	0	0	0	0	0
Zotu2659	0	0	0	0	0	0	0	0	0	0	0	0	0	0	0	0	0	0	0	0	0	0	0	0	0	0	0	0	0	0	0	0	0	0	0	0	0	0	0	0	0	0	0	0	0	0	0	0	0
Zotu266	1	0	0	0	0	0	0	0	0	0	0	0	0	0	0	0	0	0	0	0	0	0	0	0	1	0	0	0	0	0	0	0	0	0	1	0	0	0	0	0	0	0	1	0	0	0	0	0	0
Zotu2660	0	0	0	0	0	0	0	0	0	0	0	0	0	0	0	0	0	0	0	0	0	0	0	0	0	0	0	0	0	0	0	0	0	0	0	0	0	0	0	0	0	0	0	0	0	0	0	0	0
Zotu2661	0	0	0	0	0	0	0	0	0	0	0	0	0	0	0	0	0	0	0	0	0	0	0	0	0	0	0	0	0	0	0	0	0	0	0	0	0	0	0	0	0	0	0	0	0	0	0	0	0
Zotu2662	0	0	0	0	0	0	0	0	0	0	0	0	0	0	0	0	0	0	0	0	0	0	0	0	0	0	0	0	0	0	0	0	0	0	0	0	0	0	0	0	0	0	0	0	0	0	0	0	0
Zotu2663	0	0	0	0	1	0	0	0	0	0	0	0	0	0	0	0	0	0	0	0	0	0	0	0	0	0	0	0	0	0	0	0	0	0	0	0	0	0	0	0	0	0	0	0	0	0	0	0	0
Zotu2664	0	0	0	0	0	0	0	0	0	0	0	0	0	0	0	0	0	0	0	0	0	0	0	0	0	0	0	0	0	0	0	0	0	0	0	0	0	0	0	0	0	0	0	0	0	0	0	0	0
Zotu2665	0	0	0	0	0	0	0	0	0	0	0	0	0	0	0	0	0	0	0	0	0	0	0	0	0	0	0	0	0	0	0	0	0	0	0	0	0	0	0	0	0	0	0	0	0	0	0	0	0
Zotu2666	0	0	0	0	0	0	0	0	0	0	0	0	0	0	0	0	0	0	0	0	0	0	0	0	0	0	0	0	0	0	0	0	0	0	0	0	0	0	0	0	0	0	0	0	0	0	0	0	0
Zotu2667	0	0	0	0	0	0	0	0	0	0	0	0	0	0	0	0	0	0	0	0	0	0	0	0	0	0	0	0	0	0	0	0	0	0	0	0	0	0	0	0	0	0	0	0	0	0	0	0	0
Zotu2668	0	0	0	0	0	0	0	0	0	0	0	0	0	0	0	0	0	0	0	0	0	0	0	0	0	0	0	0	0	0	0	0	0	0	0	0	0	0	0	0	0	0	0	0	0	0	0	0	0
Zotu2669	0	0	0	0	0	0	0	0	0	0	0	0	0	0	0	0	0	0	0	0	0	0	0	0	0	0	0	0	0	0	0	0	0	0	0	0	0	0	0	0	0	0	0	0	0	0	0	0	0
Zotu267	0	0	0	0	0	1	0	0	0	0	0	0	1	0	0	0	0	0	0	0	0	0	0	0	0	0	0	0	9	0	0	0	1	0	0	0	0	0	0	4	0	0	0	0	0	0	0	0	1
Zotu2670	0	0	0	0	0	0	0	0	0	0	0	0	0	0	0	0	0	0	0	0	0	0	0	0	0	0	0	0	0	0	0	0	0	0	0	0	0	0	0	0	0	0	0	0	0	0	0	0	0
Zotu2671	0	0	0	0	0	0	0	0	0	0	0	0	0	0	0	0	0	0	0	0	0	0	0	0	0	0	0	0	0	0	0	0	0	0	0	0	0	0	0	0	0	0	0	0	0	0	0	0	0
Zotu2672	0	0	0	0	0	0	0	0	0	0	0	0	0	0	0	0	0	0	0	0	0	0	0	0	0	0	0	1	0	0	0	0	0	0	0	0	0	0	0	0	0	0	0	0	0	0	0	0	0
Zotu2673	0	0	0	0	0	0	0	0	0	0	0	0	0	0	0	0	0	0	0	0	0	0	0	0	0	0	2	0	0	0	0	0	0	0	0	0	0	0	0	0	0	0	0	0	0	0	0	0	0
Zotu2674	0	0	0	0	0	0	0	0	0	0	0	0	0	0	0	0	0	0	0	0	0	0	0	0	0	0	0	0	0	0	0	0	0	0	0	0	0	0	0	0	0	0	0	0	0	0	0	0	0
Zotu2675	0	0	0	0	0	0	0	0	0	0	0	0	0	0	0	0	0	0	0	0	0	0	0	0	0	0	0	0	0	0	0	0	0	0	0	0	0	0	0	0	0	0	0	0	0	0	0	0	0
Zotu2676	0	0	0	0	0	0	0	0	0	0	0	0	0	0	0	0	0	0	0	0	0	0	0	0	0	0	0	0	0	0	0	0	0	0	0	0	0	0	0	0	0	0	0	0	0	0	0	0	0
Zotu2677	0	0	0	0	0	0	0	0	0	0	0	0	0	0	0	0	0	0	0	0	0	0	0	0	0	0	0	0	0	0	0	0	0	0	0	0	0	0	0	0	0	0	0	0	0	0	0	0	0
Zotu2678	0	0	0	0	0	0	0	0	0	0	0	0	0	0	0	0	0	0	0	0	0	0	0	0	0	0	0	0	0	0	0	0	0	0	0	0	0	0	0	0	0	0	0	0	0	0	0	0	0
Zotu2679	0	0	0	0	0	0	0	0	0	0	0	0	0	0	0	0	0	0	0	0	0	0	0	0	0	0	0	0	0	0	0	0	0	0	0	0	0	0	0	0	2	0	0	0	0	0	0	0	0
Zotu268	0	0	0	0	0	2	0	0	0	0	0	0	0	0	0	0	0	0	0	0	0	0	0	0	0	0	0	0	0	0	0	0	0	0	0	0	0	0	3	0	0	0	0	0	0	0	0	0	0
Zotu2680	0	0	0	0	0	0	0	0	0	0	0	0	1	0	0	0	0	0	0	1	0	0	0	0	0	0	0	0	0	0	0	0	0	0	0	0	0	0	0	0	0	0	0	0	0	0	0	0	0
Zotu2681	0	0	0	0	0	0	0	0	0	0	0	0	0	0	0	0	0	0	0	0	0	0	0	0	0	0	0	0	0	0	0	0	0	0	0	0	0	0	0	0	0	0	0	0	0	0	0	0	0
Zotu2682	0	0	0	0	0	0	0	0	0	0	0	0	0	0	0	0	0	0	0	0	0	0	0	0	0	0	0	0	0	0	0	0	0	0	0	0	0	0	0	0	0	0	0	0	0	0	0	0	0
Zotu2683	0	0	0	0	0	0	0	0	0	0	0	0	0	0	0	0	0	0	0	0	0	0	0	0	0	0	0	0	0	0	0	0	0	0	0	0	0	0	0	0	0	0	0	0	0	0	0	0	0
Zotu2684	0	0	0	0	0	0	0	0	0	0	0	0	0	0	0	0	0	0	0	0	0	0	0	0	0	0	0	0	0	0	0	0	0	0	0	0	0	0	0	0	0	0	0	0	0	0	0	0	0
Zotu2685	0	0	0	0	0	0	0	0	0	0	0	0	0	0	0	0	0	0	0	0	0	0	0	0	0	0	0	0	0	0	0	0	0	0	0	0	0	0	0	0	0	0	0	0	0	0	0	0	0
Zotu2686	0	0	0	0	0	0	0	0	0	0	0	0	0	0	0	0	0	0	0	0	0	0	0	0	0	0	0	0	0	0	0	0	0	0	0	0	0	0	0	0	0	0	0	0	0	0	0	0	0
Zotu2687	0	0	0	0	0	0	0	0	0	0	0	0	0	0	0	0	0	0	0	0	0	0	0	0	0	0	0	0	0	0	0	0	0	0	0	0	0	0	0	0	0	0	0	0	0	0	0	0	0
Zotu2688	0	0	0	0	0	0	0	0	0	0	0	0	0	0	0	0	0	0	0	0	0	0	0	0	0	0	0	0	0	0	0	0	0	0	0	0	0	0	0	0	0	0	0	0	0	0	0	0	0
Zotu2689	0	0	0	0	0	0	0	0	0	0	0	0	0	0	0	0	0	0	0	0	0	0	0	0	0	0	0	0	0	0	0	0	0	0	0	0	0	0	0	0	0	0	0	0	0	0	0	0	0
Zotu269	0	0	0	0	2	0	0	0	0	0	0	0	0	0	0	0	0	0	0	0	0	2325	3	0	0	0	0	0	0	0	0	0	0	0	0	0	0	0	0	0	0	0	0	0	0	0	0	0	0
Zotu2690	0	0	0	0	0	0	0	0	0	0	0	0	0	0	0	0	0	0	0	0	0	0	0	0	0	0	0	0	0	0	0	0	0	0	0	0	0	0	0	0	0	0	0	0	0	0	0	0	0
Zotu2691	0	0	0	0	0	0	0	0	0	0	0	0	0	0	0	0	0	0	0	0	0	0	0	0	0	0	0	0	0	0	0	0	0	0	0	0	0	0	0	0	0	0	0	0	0	0	0	0	0
Zotu2692	0	0	0	0	0	0	0	0	0	0	0	0	0	0	0	0	0	0	0	0	0	0	0	0	0	0	0	3	0	0	0	0	0	0	0	0	0	0	0	0	0	0	0	0	0	0	0	0	0
Zotu2693	0	0	0	0	0	0	0	0	0	0	0	0	0	0	0	0	0	0	0	0	0	0	0	0	0	0	0	0	0	0	0	0	0	0	0	0	0	0	0	0	0	0	0	0	0	0	0	0	0
Zotu2694	0	0	0	0	0	0	0	0	0	0	0	0	0	0	0	0	0	0	0	0	0	0	0	0	0	0	0	0	0	0	0	0	0	0	0	0	0	0	0	0	0	0	0	0	0	0	0	0	0
Zotu2695	0	0	0	0	0	0	0	0	0	0	0	0	0	0	0	0	0	0	0	0	0	0	0	0	0	0	0	0	0	0	0	0	0	0	0	0	0	0	0	0	0	0	0	0	0	0	0	0	0
Zotu2696	0	0	0	0	0	0	0	0	0	0	0	0	0	0	0	0	0	0	0	0	0	0	0	0	0	0	0	0	0	0	0	0	0	0	0	0	0	0	0	0	0	0	0	0	0	0	0	0	0
Zotu2697	0	0	0	0	3	0	0	0	0	0	0	0	0	0	0	0	0	0	0	0	0	0	0	0	0	0	0	0	0	0	0	0	0	0	0	0	0	0	0	0	0	0	0	0	0	0	0	0	0
Zotu2698	0	0	0	0	0	0	0	0	0	0	0	0	0	0	0	0	0	0	0	0	0	0	0	0	0	0	0	10	0	0	0	0	0	0	0	0	0	0	0	0	0	0	0	0	0	0	0	0	0
Zotu2699	0	0	0	0	0	0	0	0	0	1	0	0	0	0	0	0	0	0	0	0	0	0	0	0	0	0	0	0	0	0	0	0	0	0	0	0	0	0	0	0	0	0	0	0	0	0	0	0	0
Zotu27	0	5	0	2	6	0	0	4	5	213	0	616	3	6	0	0	0	10	2	0	663	1	538	1	2	0	1238	824	163	0	1	1	1	0	3	25	0	968	0	8	1	3	2862	0	0	370	2	1	697
Zotu270	0	0	0	0	0	0	0	0	0	0	1	0	1	0	0	0	0	0	0	0	0	0	0	0	0	0	0	0	0	0	0	0	0	1	0	0	2	0	0	0	0	0	4	0	0	0	1	0	0
Zotu2700	0	0	0	0	0	0	0	0	0	0	0	0	0	0	0	0	0	0	0	0	0	0	0	0	0	0	0	0	0	0	0	0	0	0	0	0	0	0	0	0	0	0	0	0	0	0	0	0	0
Zotu2701	0	0	0	0	0	0	0	0	0	0	0	0	0	0	0	0	0	0	0	0	0	0	0	0	0	0	0	0	0	0	0	0	0	0	0	0	0	0	0	0	0	0	0	0	0	0	0	0	0
Zotu2702	0	0	0	0	0	0	0	0	0	0	0	0	0	0	0	0	0	0	0	0	0	0	0	0	0	0	0	0	0	0	0	0	0	0	0	0	0	0	0	0	0	0	0	0	0	0	0	0	0
Zotu2703	0	0	0	0	0	0	0	0	0	0	0	0	0	0	0	0	0	0	0	0	0	0	0	0	0	0	0	0	0	0	0	0	0	0	0	0	0	0	0	0	0	0	0	0	0	0	0	0	0
Zotu2704	0	0	0	0	0	0	0	0	0	0	0	0	0	0	0	0	0	0	0	0	0	0	0	0	0	0	0	0	0	0	0	0	0	0	0	0	0	0	0	0	0	0	0	0	0	0	0	0	0
Zotu2705	0	0	0	0	0	0	0	0	0	0	0	0	0	0	0	0	0	0	0	0	0	0	0	0	0	0	0	0	0	0	0	0	0	0	0	0	0	0	0	0	0	0	0	0	0	0	0	0	0
Zotu2706	0	0	0	0	0	0	0	0	0	0	0	0	0	0	0	0	0	0	0	0	0	0	0	0	0	0	0	0	0	0	0	0	0	0	0	0	0	0	0	0	0	0	0	0	0	0	0	0	0
Zotu2707	0	0	0	0	0	0	0	0	0	0	0	0	0	0	0	0	0	1	0	0	0	0	0	0	0	0	0	0	0	0	0	0	0	0	0	0	0	0	0	0	0	0	0	0	0	0	0	0	0
Zotu2708	0	0	0	0	0	0	0	0	0	0	0	0	0	0	0	0	0	2	0	0	0	0	0	0	0	0	0	0	0	0	0	0	0	0	0	0	0	0	0	0	0	0	0	0	0	0	0	0	0
Zotu2709	0	0	0	0	0	0	0	0	0	0	0	0	0	0	0	0	0	0	0	0	0	0	0	0	0	0	0	0	0	0	0	0	0	0	0	0	0	0	0	0	0	0	0	0	0	0	0	0	0
Zotu271	0	0	0	0	0	0	0	0	0	0	0	0	0	0	1	0	0	0	0	0	0	0	0	0	0	1	0	0	0	0	0	0	0	0	2	0	0	0	0	0	0	0	0	0	0	0	0	0	0
Zotu2710	0	0	0	0	0	0	0	0	0	0	0	0	0	0	0	0	0	0	0	0	0	0	0	0	0	0	0	0	0	0	0	0	0	0	0	0	0	0	0	0	0	0	0	0	0	0	0	0	0
Zotu2711	0	0	0	0	0	0	0	0	0	0	0	0	0	0	0	0	0	0	0	0	0	0	0	0	0	0	0	0	0	0	0	0	0	0	0	0	0	0	0	0	0	0	0	0	0	0	0	0	0
Zotu2712	0	0	0	0	0	0	0	0	0	0	0	0	0	0	0	0	0	0	0	0	0	0	0	0	0	0	0	0	0	0	0	0	0	0	0	0	0	0	0	0	0	0	0	0	0	0	0	0	0
Zotu2713	0	0	0	0	0	0	0	0	0	0	0	0	0	0	0	0	0	0	0	0	0	0	0	0	0	0	0	0	0	0	0	0	0	0	0	0	0	0	0	0	0	0	0	0	0	0	0	0	0
Zotu2714	0	0	0	0	0	0	0	0	0	0	0	0	0	0	0	0	0	0	0	0	0	0	0	0	0	0	0	0	0	0	0	0	0	0	0	0	0	0	0	0	0	0	0	0	0	0	0	0	0
Zotu2715	0	0	0	0	0	0	0	0	0	1	0	0	0	0	0	0	0	0	0	0	0	0	0	0	0	0	0	0	0	0	0	0	0	0	0	0	0	0	0	0	0	0	0	0	0	0	0	0	0
Zotu2716	0	0	0	0	0	0	0	0	0	0	0	0	0	0	0	0	0	0	0	0	0	0	0	0	0	0	0	0	0	0	0	0	0	0	0	0	0	0	0	0	0	0	0	0	0	0	0	0	0
Zotu2717	0	0	0	0	0	0	0	0	0	0	0	0	0	0	0	0	0	0	0	0	0	0	0	0	0	0	0	0	0	0	0	0	0	0	0	0	0	0	0	0	0	0	0	0	0	0	0	0	0
Zotu2718	0	0	0	0	0	0	0	0	0	0	0	0	0	0	0	0	0	0	0	0	0	0	0	0	0	0	0	0	0	0	0	0	0	0	0	0	0	0	0	0	0	0	0	0	0	0	0	0	0
Zotu2719	0	0	0	0	0	0	0	0	0	0	0	0	0	0	0	0	0	0	0	0	0	0	0	0	0	0	0	0	0	0	0	0	0	0	0	0	0	0	0	0	0	0	0	0	0	0	0	0	0
Zotu272	0	0	0	0	0	0	0	0	0	0	0	0	0	0	0	0	0	0	0	0	0	0	0	0	0	0	0	0	0	0	0	0	0	0	0	0	0	0	0	0	0	0	0	0	0	0	0	0	0
Zotu2720	0	0	0	0	0	0	0	0	0	0	0	0	0	0	0	0	0	0	0	0	0	0	0	0	0	0	0	0	0	0	0	0	0	0	0	0	0	0	0	0	0	0	0	0	0	0	0	0	0
Zotu2721	0	0	0	0	0	0	0	0	0	0	0	0	0	0	0	0	0	0	0	0	0	0	0	0	0	0	0	0	0	0	0	0	0	0	0	0	0	0	0	0	0	0	0	0	0	0	0	0	0
Zotu2722	0	0	0	0	0	0	0	0	0	0	0	0	0	0	0	0	0	0	0	0	0	0	0	0	0	0	0	0	0	0	0	0	0	0	0	0	0	0	0	0	0	0	0	0	0	0	0	0	0
Zotu2723	0	0	0	0	0	0	0	0	0	1	0	0	0	0	0	0	0	0	0	0	0	0	0	0	0	0	0	0	0	0	0	0	0	0	0	0	0	0	0	0	0	0	0	0	0	0	0	0	0
Zotu2724	0	0	0	0	0	0	0	0	0	0	0	0	0	0	0	0	0	0	0	0	0	0	0	0	0	0	0	0	0	0	0	0	0	0	0	0	0	0	0	0	0	0	0	0	0	0	0	0	0
Zotu2725	0	0	0	0	0	0	0	0	0	0	0	0	0	0	0	0	0	0	0	0	0	0	0	0	0	0	0	0	0	0	0	0	1	0	0	0	0	0	0	0	0	0	0	0	0	0	0	0	0
Zotu2726	0	0	0	0	0	0	0	0	0	0	0	0	0	0	0	0	0	0	0	0	0	0	0	0	0	0	0	0	0	0	0	0	0	0	0	0	0	0	0	0	0	0	0	0	0	0	0	0	0
Zotu2727	0	0	0	0	0	0	0	0	0	0	0	0	0	0	0	0	0	0	0	0	0	0	0	0	0	0	0	0	0	0	0	0	0	0	0	0	0	0	0	0	0	0	0	0	0	0	0	0	0
Zotu2728	0	0	0	0	0	0	0	0	0	0	0	0	0	0	0	0	0	0	0	2	0	0	0	0	0	0	0	0	0	0	0	0	0	0	0	0	0	0	0	0	0	0	0	0	0	0	0	0	0
Zotu2729	0	0	0	0	0	0	0	0	0	0	0	0	0	0	0	0	0	0	0	0	0	0	0	0	0	0	0	0	0	0	0	0	0	0	0	0	0	0	0	0	0	0	0	0	0	0	0	0	0
Zotu273	0	0	0	0	0	0	0	0	0	0	0	0	0	0	0	0	0	0	0	0	0	0	0	0	0	0	321	0	3	0	0	0	0	0	0	0	0	0	0	0	0	0	0	0	0	0	0	0	0
Zotu2730	0	0	0	0	0	0	0	0	0	0	0	0	0	0	0	0	0	0	0	0	0	0	0	0	0	0	0	0	0	0	0	0	0	0	0	0	0	0	0	0	0	0	0	0	0	0	0	0	0
Zotu2731	0	0	0	0	0	0	0	0	0	0	0	0	0	0	0	0	0	0	0	0	0	0	0	0	0	0	0	0	0	0	0	0	0	0	0	0	0	0	0	0	0	0	0	0	0	0	0	0	0
Zotu2732	0	0	0	0	0	0	0	0	0	0	0	0	0	0	0	0	0	0	0	0	0	0	0	0	0	0	0	0	0	0	0	19	2	0	0	0	0	0	0	0	0	22	0	0	0	0	0	0	0
Zotu2733	0	0	0	0	0	0	0	0	0	0	0	0	0	0	0	0	0	0	0	0	0	0	0	0	0	0	0	0	0	0	0	0	0	0	0	0	0	0	0	0	0	0	0	0	0	0	0	0	0
Zotu2734	0	0	0	0	0	0	0	0	0	0	0	0	0	0	0	0	0	0	0	0	0	0	0	0	0	0	0	0	0	0	0	0	0	0	0	0	0	0	0	0	0	0	0	0	0	0	0	0	0
Zotu2735	0	0	0	0	0	0	0	0	0	0	0	0	0	0	0	0	0	0	0	0	0	0	0	0	0	0	0	0	0	0	0	0	0	0	0	0	0	0	0	0	0	0	0	0	0	0	0	0	0
Zotu2737	0	0	0	0	0	0	0	0	0	0	0	0	0	0	0	0	0	0	0	0	0	0	0	0	0	0	0	0	0	0	0	0	0	0	0	0	0	0	0	1	0	0	0	0	0	0	0	0	0
Zotu2738	7	0	0	0	0	0	0	0	0	0	0	0	0	0	0	0	0	0	0	0	0	0	0	0	0	0	0	0	0	0	0	0	0	0	0	0	0	0	0	0	0	0	0	0	0	0	0	0	0
Zotu2739	0	0	0	0	0	0	0	0	0	0	0	0	0	0	0	0	0	0	0	0	0	0	0	0	0	0	0	0	0	0	0	0	0	0	0	0	0	0	0	0	0	0	0	21	0	0	0	0	0
Zotu274	0	1	0	0	3	0	0	0	0	0	0	0	0	0	0	0	0	0	0	0	0	1	0	0	0	0	0	0	0	0	0	0	0	0	0	0	0	0	0	0	0	0	0	0	0	0	0	0	0
Zotu2740	0	0	0	0	0	0	0	0	0	0	0	0	0	0	0	0	0	0	0	0	0	0	0	0	0	0	0	0	0	0	0	0	0	0	0	0	0	0	0	0	0	0	0	0	0	0	0	0	0
Zotu2741	0	0	0	0	0	0	0	0	0	0	0	0	0	0	0	0	0	0	0	0	0	0	0	0	0	0	0	0	0	0	0	0	0	0	0	0	0	0	0	0	0	0	0	0	0	0	0	0	0
Zotu2742	0	0	0	0	0	0	0	0	0	0	0	0	0	0	0	0	0	2	0	0	0	0	0	0	0	0	0	0	0	0	0	0	0	0	0	0	0	0	0	0	0	0	0	0	0	0	0	0	0
Zotu2743	0	0	0	0	0	0	0	0	0	0	0	0	0	0	0	0	0	0	0	0	0	0	0	0	0	0	0	0	0	0	0	0	0	0	0	0	0	0	0	0	0	0	0	0	0	0	0	0	0
Zotu2744	0	0	0	0	0	0	0	0	0	0	0	0	0	0	0	0	0	0	0	0	0	0	0	0	0	0	0	0	0	0	0	0	0	0	0	0	0	0	0	0	0	0	0	0	0	0	0	0	0
Zotu2745	0	0	0	0	0	0	0	0	0	0	0	0	0	0	0	0	0	0	0	0	0	0	0	0	0	0	0	0	0	0	0	0	0	0	0	0	0	0	0	0	0	6	0	0	0	0	0	0	0
Zotu2746	0	0	0	0	0	0	0	0	0	0	0	0	0	0	0	0	0	0	0	0	0	0	0	0	0	0	0	0	0	0	0	0	0	0	0	0	0	0	0	0	0	0	0	0	0	0	0	0	0
Zotu2747	0	0	0	0	0	0	0	0	0	0	0	0	0	0	0	0	0	0	0	0	0	0	0	0	0	0	0	0	0	0	0	0	0	0	0	0	0	0	0	0	0	0	0	0	0	0	0	0	0
Zotu2748	0	0	0	0	0	0	0	0	0	0	0	0	0	0	0	0	0	0	0	0	0	0	0	0	0	0	0	0	0	0	0	0	0	0	0	0	0	0	0	0	0	0	0	0	0	0	0	0	0
Zotu2749	0	0	0	0	0	0	0	0	0	0	0	0	0	0	0	0	0	0	0	0	0	0	0	0	0	0	0	1	0	0	0	0	0	0	0	0	0	0	0	0	0	0	0	0	0	0	0	0	0
Zotu275	0	1	0	0	1	0	0	0	0	0	0	0	0	0	0	0	0	0	0	0	0	0	0	0	0	0	0	0	0	0	0	1	0	0	0	0	0	0	0	0	0	0	0	0	0	0	0	0	0
Zotu2750	0	0	0	0	0	0	0	0	0	0	0	0	0	0	0	0	0	0	0	0	0	0	0	0	0	0	0	0	0	0	0	0	0	0	0	0	0	0	0	0	0	0	0	0	0	0	0	0	0
Zotu2751	0	0	0	0	0	0	0	0	0	0	0	0	0	0	0	0	0	0	0	0	0	0	0	0	0	0	0	0	0	0	0	0	0	0	0	0	0	0	0	0	0	0	0	0	0	0	0	0	0
Zotu2752	0	0	0	0	0	0	0	0	0	0	0	0	0	0	0	0	0	0	0	0	0	0	0	0	0	0	0	0	0	0	0	0	0	0	0	0	0	0	0	0	0	0	0	0	0	0	0	0	0
Zotu2753	0	0	0	0	0	0	0	0	0	0	0	0	0	0	0	0	0	0	0	0	0	0	0	0	0	0	0	0	0	0	0	0	0	0	0	0	0	0	0	0	0	0	0	0	0	0	0	0	0
Zotu2754	0	0	0	0	0	0	0	0	0	0	0	0	0	0	0	0	0	0	0	0	0	0	0	0	0	0	0	0	0	0	0	0	0	0	0	0	0	0	0	0	0	0	0	0	0	0	0	0	0
Zotu2755	0	0	0	0	0	0	0	0	0	0	0	0	0	0	0	0	0	0	0	0	0	0	0	0	0	0	0	0	0	0	0	0	0	0	0	0	0	0	0	0	0	0	0	0	0	0	0	0	0
Zotu2756	0	0	0	0	0	0	0	0	0	0	0	0	0	0	0	0	0	0	0	0	0	0	0	0	0	0	0	0	0	0	0	0	0	0	0	0	0	0	0	0	0	0	0	0	0	0	0	0	0
Zotu2757	0	0	0	0	0	0	0	0	0	0	0	0	0	0	0	0	0	0	0	0	0	0	0	0	0	0	0	0	0	0	0	0	0	0	0	0	0	0	0	0	0	0	0	0	0	0	0	0	0
Zotu2758	0	0	0	0	0	0	0	0	0	0	0	0	0	0	0	0	0	0	0	0	0	0	0	0	0	0	0	0	0	0	0	0	0	0	0	0	0	0	0	0	0	0	0	0	0	0	0	0	0
Zotu2759	0	0	0	0	1	0	0	0	0	0	0	0	0	0	0	0	0	0	0	0	0	0	0	0	0	0	0	1	0	0	0	0	0	0	0	0	0	0	0	0	0	0	0	0	0	0	0	0	0
Zotu276	0	0	1	0	0	0	0	0	0	0	0	0	0	0	0	0	0	0	0	999	0	0	0	0	0	0	2	145	0	0	0	0	0	0	0	0	0	0	0	0	0	0	0	0	0	0	0	0	0
Zotu2760	0	0	0	0	0	0	0	0	0	7	0	0	0	0	0	0	0	0	0	0	0	0	0	0	0	0	0	0	0	0	0	0	0	0	0	0	0	0	0	0	0	0	0	0	0	0	0	0	0
Zotu2761	0	0	0	0	0	0	0	0	0	0	0	0	0	0	0	0	0	0	0	0	0	1	0	0	0	0	0	0	0	0	0	0	0	0	0	0	0	0	0	0	0	0	0	0	0	0	0	0	0
Zotu2762	0	0	0	0	0	0	0	0	0	0	0	0	0	0	0	0	0	0	0	0	0	0	0	0	0	0	0	0	0	0	0	0	0	0	0	0	0	0	0	0	0	0	0	0	0	0	0	0	0
Zotu2763	0	0	0	0	0	0	0	0	0	0	0	0	0	0	0	0	0	0	0	0	0	0	0	0	0	0	0	0	0	0	0	0	0	0	0	0	0	0	0	0	0	0	0	0	0	0	0	0	0
Zotu2764	0	0	0	0	0	0	0	0	0	0	0	0	0	0	0	0	0	0	0	0	0	0	0	0	0	0	0	0	0	0	0	0	0	0	0	0	0	0	0	0	0	0	0	0	0	0	0	0	0
Zotu2765	0	0	0	0	0	0	0	0	0	0	0	0	0	0	0	0	0	0	0	0	0	0	0	0	0	0	0	0	0	0	0	0	0	0	0	0	0	0	0	0	0	0	0	0	0	0	0	0	0
Zotu2766	0	94	0	0	0	0	0	0	0	0	0	0	0	2	0	0	0	0	0	0	0	0	0	0	0	0	0	0	0	0	0	0	0	0	0	0	0	1	0	3	0	0	0	0	0	0	0	0	0
Zotu2767	0	0	0	0	0	0	0	0	0	0	0	0	0	0	0	0	0	0	0	0	0	0	0	0	0	0	0	0	0	0	0	0	0	0	0	0	0	0	0	0	0	0	0	0	0	0	0	0	0
Zotu2768	0	0	0	0	0	0	0	0	0	0	0	0	0	0	0	0	0	0	0	0	0	0	0	0	0	0	0	0	0	0	0	0	0	0	0	0	0	0	0	0	0	0	0	0	0	0	0	0	0
Zotu2769	0	0	0	0	0	0	0	0	0	0	0	0	0	0	0	0	0	0	0	0	0	0	0	0	0	0	0	0	0	0	0	0	0	0	0	0	0	0	0	0	0	0	0	0	0	0	0	0	0
Zotu277	0	0	0	0	0	0	0	0	0	0	0	3	0	0	0	0	0	0	0	0	0	1	5	0	0	0	0	0	0	0	0	0	0	0	0	0	0	1	0	0	0	0	0	0	0	0	0	0	0
Zotu2770	0	0	0	0	0	0	0	0	0	0	0	0	0	0	0	0	0	0	0	0	0	0	0	0	0	0	0	0	0	0	0	0	0	0	0	0	0	0	0	0	0	0	0	0	0	0	0	0	0
Zotu2771	0	0	0	0	0	0	0	0	0	0	0	0	0	0	0	0	0	0	0	0	0	0	0	0	0	0	0	0	0	0	0	0	0	0	0	0	0	0	0	0	0	0	0	0	0	0	0	0	0
Zotu2772	0	0	0	0	0	0	0	0	0	0	0	0	0	0	0	0	0	0	0	0	0	0	0	0	0	0	0	0	0	0	0	0	0	0	0	0	0	0	0	1	0	0	0	0	0	0	0	0	0
Zotu2773	0	0	0	0	0	0	0	0	0	0	0	0	0	0	0	0	0	0	0	0	0	0	0	0	0	0	0	0	0	0	0	0	0	0	0	0	0	0	0	0	0	0	0	0	0	0	0	0	0
Zotu2774	0	0	0	0	0	0	0	0	0	1	0	0	0	0	0	0	0	0	0	0	0	0	0	0	0	0	0	0	0	0	0	0	0	0	0	0	0	0	0	0	0	0	0	0	0	0	0	0	0
Zotu2775	0	0	0	0	0	0	0	0	0	0	0	0	0	0	0	0	0	0	0	0	0	0	0	0	0	0	0	0	0	0	0	0	0	0	0	0	0	0	0	0	0	0	0	0	0	0	0	0	0
Zotu2776	0	0	0	0	0	0	0	0	0	0	0	0	0	0	0	0	0	0	0	0	0	0	0	0	0	0	0	0	0	0	0	0	0	0	0	0	0	0	0	0	0	0	0	0	0	0	0	0	0
Zotu2777	0	0	0	0	0	0	0	0	0	0	0	0	0	0	0	0	0	0	0	0	0	0	0	0	0	0	0	0	0	0	0	0	0	0	0	0	0	0	0	0	0	0	0	0	0	0	0	0	0
Zotu2778	0	0	0	0	3	0	0	0	0	0	0	0	0	0	0	0	0	2	0	0	0	0	0	0	0	0	0	0	0	0	0	0	0	0	0	0	0	0	0	0	0	0	0	0	0	0	0	0	0
Zotu2779	0	0	0	0	0	0	0	0	0	0	0	0	0	0	0	0	0	0	0	0	0	0	0	0	0	0	0	0	0	0	0	0	0	0	0	0	0	0	0	0	0	0	0	0	0	0	0	0	0
Zotu278	0	0	0	0	0	0	0	0	0	0	0	0	0	0	0	1	3	0	0	0	0	0	0	0	0	0	0	0	1	0	0	0	0	0	0	0	0	0	0	0	0	0	0	0	1	0	0	0	0
Zotu2780	0	0	0	0	0	0	0	0	0	0	0	0	0	0	0	0	0	1	0	0	0	0	0	0	0	0	0	0	0	0	0	0	0	0	0	0	0	0	0	0	0	0	0	0	0	0	0	0	0
Zotu2781	0	0	0	0	0	0	0	0	0	0	0	0	0	0	0	0	0	0	0	0	0	0	0	0	0	0	0	0	0	0	0	0	0	0	0	0	0	0	0	0	0	0	0	0	0	0	0	0	0
Zotu2782	0	0	0	0	0	0	0	0	0	0	0	0	0	0	0	0	0	0	0	0	0	0	0	0	0	0	0	0	0	0	0	0	0	0	0	0	0	0	0	0	0	0	0	0	0	0	0	0	0
Zotu2783	0	0	0	0	0	0	0	0	0	0	0	0	0	0	0	0	0	0	0	0	0	0	0	0	0	0	0	0	0	0	0	0	0	0	0	0	0	0	0	0	0	0	0	0	0	0	0	0	0
Zotu2784	0	0	0	0	0	0	0	0	0	0	0	0	0	0	0	0	0	0	0	0	0	0	0	0	0	0	0	0	0	0	0	0	0	0	0	0	0	0	0	0	0	0	0	0	0	0	0	0	0
Zotu2785	0	0	0	0	0	0	0	0	0	0	0	0	0	0	0	0	0	0	0	0	0	0	0	0	0	0	0	0	0	0	0	0	0	0	0	0	0	0	0	0	0	0	0	0	0	0	0	0	0
Zotu2786	0	0	0	0	0	0	0	0	0	0	0	0	0	0	0	0	0	0	0	0	0	0	0	0	0	0	0	0	0	0	0	0	0	0	0	0	0	0	0	0	0	0	0	0	0	0	0	0	0
Zotu2787	0	0	0	0	0	0	0	0	0	0	0	0	0	0	0	0	0	0	0	0	0	0	0	0	0	0	0	0	0	0	0	0	0	0	0	0	0	0	0	0	0	0	0	0	0	0	0	0	0
Zotu2788	0	0	0	0	0	0	0	0	0	0	0	0	0	0	0	0	0	0	0	0	0	0	0	0	0	0	0	0	0	0	0	0	0	0	0	0	0	0	0	0	0	0	0	0	0	0	0	0	0
Zotu2789	0	0	0	0	0	0	0	0	0	0	0	0	0	0	0	0	0	0	0	0	0	0	0	0	0	0	0	0	0	0	0	0	0	0	0	0	0	0	0	0	0	0	0	0	0	0	0	0	0
Zotu279	0	0	0	0	0	0	0	0	0	0	0	0	0	0	0	0	0	0	0	0	0	1	0	0	0	0	0	0	0	0	0	0	0	0	0	0	0	0	0	0	0	0	0	0	0	0	0	0	0
Zotu2790	0	0	0	0	0	0	0	0	0	0	0	0	0	0	0	0	0	0	0	0	0	0	0	0	0	0	0	0	0	0	0	0	0	0	0	0	0	0	0	0	0	0	0	0	0	0	0	0	0
Zotu2791	0	0	0	0	0	0	0	0	0	0	0	0	0	0	0	0	0	0	0	0	0	0	0	0	0	0	0	0	0	0	0	0	0	0	0	0	0	0	0	0	0	0	0	0	0	0	0	0	0
Zotu2792	0	0	0	0	0	0	0	0	0	0	0	0	0	0	0	0	0	1	0	0	0	0	0	0	0	0	0	0	0	0	0	0	0	0	0	0	0	0	0	0	0	0	0	0	0	0	0	0	0
Zotu2793	0	0	0	0	0	0	0	0	0	0	0	0	0	0	0	0	0	0	0	0	0	0	0	0	0	0	0	0	0	0	0	0	0	0	0	0	0	0	0	0	0	0	0	0	0	0	0	0	0
Zotu2794	0	0	0	0	0	0	0	0	0	0	0	1	0	0	0	0	0	0	0	0	0	0	0	0	0	0	0	0	0	0	0	0	0	0	0	0	0	0	0	0	0	0	0	0	0	0	0	0	0
Zotu2795	0	0	0	0	0	0	0	0	0	0	13	0	1	0	0	0	0	0	0	0	0	0	0	0	0	0	0	0	0	0	0	0	0	17	0	0	0	0	0	0	0	0	0	0	0	0	0	0	0
Zotu2796	0	0	0	0	0	0	0	0	0	0	0	0	0	0	0	0	0	0	0	0	0	0	0	0	0	0	0	0	0	0	0	0	0	0	0	0	0	0	0	0	0	0	0	0	0	0	0	0	0
Zotu2797	0	0	0	0	0	0	0	0	0	0	0	0	0	0	0	0	0	0	0	0	0	0	0	0	0	0	0	0	0	0	0	0	0	0	0	0	0	0	0	0	0	0	0	0	0	0	0	0	0
Zotu2798	0	0	0	0	0	0	0	0	0	0	0	0	0	0	0	0	0	0	0	0	0	0	0	0	0	0	0	0	0	0	0	0	0	0	0	0	0	0	0	0	0	0	0	0	0	0	0	0	0
Zotu2799	0	0	0	0	0	0	0	0	0	0	0	0	0	0	0	0	0	0	0	0	0	0	0	0	0	0	0	0	1	0	0	0	0	0	0	0	0	0	0	0	0	0	0	0	0	0	0	0	0
Zotu28	4	1	0	4	2577	4	0	0	0	0	1	1	0	2	0	4	2	3342	0	0	0	5147	4	2	0	1	0	0	3	0	0	0	0	0	2	0	0	4	3	0	1	0	0	0	1	0	0	0	0
Zotu280	0	0	0	0	0	0	0	0	0	0	0	0	0	0	0	0	0	0	0	0	0	0	0	0	0	0	0	0	57	0	0	0	0	0	0	1	0	0	0	0	0	0	0	0	0	0	0	0	0
[truncated: 1,859 more rows]
[truncated: 504 more columns]

## Sheet: Sheet2
zotus	taxonomy	Taxon	Taxon Level	Trophic Mode	Guild	Growth Morphology	Trait	Confidence Ranking	Notes	Citation/Source
Zotu1	d:Fungi(1.0000),p:Ascomycota(1.0000),c:Dothideomycetes(1.0000),o:Capnodiales(0.7100),f:Cladosporiaceae(0.4300),g:Cladosporium(0.4300),s:Cladosporium_grevilleae_SH176536.07FU(0.3100)	Cladosporium	13	Pathotroph-Saprotroph-Symbiotroph	Animal Pathogen-Endophyte-Lichen Parasite-Plant Pathogen-Wood Saprotroph	Microfungus	NULL	Possible	NULL	b'Seehann G, et al. 1975. List of Fungi in Soft-Rot Tissue Tests. Institute fur Holzbiologie und Holzschutz, Bundesforschungsanstalt fur Forst - und Holzwirtshaft, Hamburg - Lohbrugge, Germany; Lawrey JD, Diederich P. 2016. URL: http://www.lichenicolous.net [24 May 2017]; http://www.apsnet.org/publications/commonnames/Pages/default.aspx'
Zotu10	d:Fungi(1.0000),p:Ascomycota(1.0000),c:Dothideomycetes(1.0000),o:Capnodiales(0.7100),f:Cladosporiaceae(0.3900),g:Cladosporium(0.3900),s:Cladosporium_grevilleae_SH176536.07FU(0.2600)	Cladosporium	13	Pathotroph-Saprotroph-Symbiotroph	Animal Pathogen-Endophyte-Lichen Parasite-Plant Pathogen-Wood Saprotroph	Microfungus	NULL	Possible	NULL	b'Seehann G, et al. 1975. List of Fungi in Soft-Rot Tissue Tests. Institute fur Holzbiologie und Holzschutz, Bundesforschungsanstalt fur Forst - und Holzwirtshaft, Hamburg - Lohbrugge, Germany; Lawrey JD, Diederich P. 2016. URL: http://www.lichenicolous.net [24 May 2017]; http://www.apsnet.org/publications/commonnames/Pages/default.aspx'
Zotu100	d:Fungi(1.0000),p:Ascomycota(1.0000),c:Sordariomycetes(1.0000),o:Xylariales(0.9700)	-	-	-	-	-	-	-	Unassigned	-
Zotu1000	d:Fungi(1.0000),p:Basidiomycota(0.6200),c:Cystobasidiomycetes(0.6200),o:Erythrobasidiales(0.6200),f:Erythrobasidiaceae(0.6200),g:Erythrobasidium(0.6200),s:Erythrobasidium_hasegawianum_SH194739.07FU(0.6200)	Erythrobasidium	13	Saprotroph	Undefined Saprotroph	Yeast	NULL	Possible	NULL	b'Sugiyama J, Hamamoto M. 1998. The Yeasts 4:654-655 (https://doi.org/10.1016/B978-044481312-1/50086-1)'
Zotu1001	d:Fungi(1.0000),p:Basidiomycota(1.0000),c:Tremellomycetes(1.0000),o:Tremellales(1.0000)	-	-	-	-	-	-	-	Unassigned	-
Zotu1002	d:Fungi(1.0000),p:Ascomycota(0.9200),c:Leotiomycetes(0.9000),o:Helotiales(0.9000),f:Helotiales_fam_Incertae_sedis(0.7400),g:Phialocephala(0.5900),s:Phialocephala_scopiformis_SH218120.07FU(0.4900)	Phialocephala	13	Symbiotroph	Endophyte	NULL	NULL	Highly Probable	Dark Septate Endophyte, known from plant roots.	b'Newsham 2011. New Phytologist 190:783-793 (as DSE)'
Zotu1003	d:Fungi(1.0000),p:Ascomycota(1.0000),c:Sordariomycetes(1.0000),o:Xylariales(1.0000),f:Xylariaceae(1.0000),g:Rosellinia(1.0000),s:Rosellinia_subiculata_SH205801.07FU(1.0000)	Rosellinia	13	Saprotroph	Undefined Saprotroph	NULL	NULL	Probable	NULL	b'Tedersoo L, et al. 2014. Science 346:1256688'
Zotu1004	d:Fungi(1.0000),p:Basidiomycota(1.0000),c:Tremellomycetes(1.0000),o:Tremellales(1.0000),f:Bulleribasidiaceae(0.6800),g:Vishniacozyma(0.6800),s:Vishniacozyma_tephrensis_SH085566.07FU(0.6800)	-	-	-	-	-	-	-	Unassigned	-
Zotu1005	d:Fungi(1.0000),p:Ascomycota(1.0000),c:Dothideomycetes(0.9800),o:Capnodiales(0.0700),f:Mycosphaerellaceae(0.0700),g:Ramularia(0.0400),s:Ramularia_tricherae_SH522467.07FU(0.0200)	Ramularia	13	Pathotroph	Plant Pathogen	Microfungus	NULL	Probable	NULL	b'Tedersoo L, et al. 2014. Science 346:1256688'
Zotu1006	d:Fungi(1.0000),p:Ascomycota(1.0000),c:Dothideomycetes(0.9900),o:Pleosporales(0.9900),f:Pleosporaceae(0.9900),g:Alternaria(0.9600),s:Alternaria_oregonensis_SH628739.07FU(0.5500)	Alternaria	13	Pathotroph-Saprotroph-Symbiotroph	Animal Pathogen-Endophyte-Plant Pathogen-Wood Saprotroph	Microfungus	Soft Rot	Possible	NULL	b'Duncan CG, Eslyn WE. 1966. Mycologia 58:642-664; Seehann G, et al. 1975. List of Fungi in Soft-Rot Tissue Tests. Institute fur Holzbiologie und Holzschutz, Bundesforschungsanstalt fur Forst - und Holzwirtshaft, Hamburg - Lohbrugge, Germany; Tedersoo L, et al. 2014. Science 346:125688'
Zotu1007	d:Fungi(1.0000),p:Basidiomycota(1.0000),c:Agaricomycetes(1.0000),o:Agaricales(1.0000),f:Bolbitiaceae(1.0000),g:Conocybe(1.0000),s:Conocybe_crispa_SH179180.07FU(0.6600)	Conocybe	13	Saprotroph	Undefined Saprotroph	NULL	NULL	Probable	NULL	b'Tedersoo L, et al. 2014. Science 346:1256688'
Zotu1008	d:Fungi(1.0000),p:Ascomycota(1.0000),c:Sordariomycetes(1.0000),o:Glomerellales(1.0000),f:Glomerellaceae(0.9900),g:Colletotrichum(0.9600),s:Colletotrichum_gloeosporioides_SH010223.07FU(0.2300)	Colletotrichum	13	Pathotroph-Symbiotroph	Endophyte-Plant Pathogen	Microfungus	NULL	Probable	NULL	b'Costa IPMW, et al. 2012. Mycotaxon 119:26; Tedersoo L, et al. 2014. Science 346:1256688; http://www.apsnet.org/publications/commonnames/Pages/default.aspx'
Zotu1009	d:Fungi(1.0000),p:Basidiomycota(1.0000),c:Tremellomycetes(1.0000),o:Tremellales(1.0000),f:Bulleribasidiaceae(1.0000),g:Hannaella(1.0000),s:Hannaella_luteola_SH180500.07FU(0.7400)	-	-	-	-	-	-	-	Unassigned	-
Zotu101	d:Fungi(1.0000),p:Ascomycota(0.5900),c:Leotiomycetes(0.5900),o:Leotiomycetes_ord_Incertae_sedis(0.5900),f:Pseudeurotiaceae(0.5900)	-	-	-	-	-	-	-	Unassigned	-
Zotu1010	d:Fungi(1.0000),p:Ascomycota(1.0000),c:Sordariomycetes(0.9800),o:Diaporthales(0.4900),f:Gnomoniaceae(0.4500),g:Gnomoniopsis(0.4500),s:Gnomoniopsis_comari_SH017598.07FU(0.4500)	-	-	-	-	-	-	-	Unassigned	-
Zotu1011	d:Fungi(1.0000),p:Basidiomycota(1.0000),c:Malasseziomycetes(1.0000),o:Malasseziales(1.0000),f:Malasseziaceae(1.0000),g:Malassezia(1.0000),s:Malassezia_globosa_SH184036.07FU(0.3700)	Malassezia	13	Pathotroph-Saprotroph	Animal Pathogen-Undefined Saprotroph	Facultative Yeast	NULL	Probable	A lipid-dependent fungus growing on the sebaceous areas of human skin that may cause or exacerbate several skin diseases (Pityrosporum is a synonym that has been used for the yeast forms)	b'Findley K, et al. 2013. Nature 498:367-370'
Zotu1012	d:Fungi(1.0000),p:Ascomycota(1.0000),c:Sordariomycetes(0.9800),o:Xylariales(0.9800),f:Xylariaceae(0.0200),g:Daldinia(0.0200),s:Daldinia_loculata_SH212983.07FU(0.0200)	Daldinia	13	Saprotroph	Undefined Saprotroph	NULL	NULL	Probable	NULL	b'Tedersoo L, et al. 2014. Science 346:1256688'
Zotu1013	d:Fungi(1.0000),p:Ascomycota(1.0000),c:Dothideomycetes(1.0000),o:Capnodiales(1.0000),f:Teratosphaeriaceae(1.0000),g:Devriesia(1.0000),s:Devriesia_pseudoamericana_SH192615.07FU(1.0000)	Devriesia	13	Pathotroph	Plant Pathogen	NULL	NULL	Probable	NULL	b'Tedersoo L, et al. 2014. Science 346:1256688'
Zotu1014	d:Fungi(1.0000),p:Basidiomycota(0.7100),c:Agaricomycetes(0.7100),o:Auriculariales(0.7100),f:Exidiaceae(0.5900),g:Exidia(0.3200),s:Exidia_saccharina_SH203205.07FU(0.2200)	Exidia	13	Saprotroph-Symbiotroph	Endophyte-Undefined Saprotroph	Tremelloid	NULL	Probable	NULL	b'Tedersoo L, et al. 2014. Science 346:1256688 (doi:10.1126/science.1256688); David AS, et al. 2016. Microbial Ecology 71:912-926'
Zotu1015	d:Fungi(1.0000),p:Ascomycota(1.0000),c:Sordariomycetes(1.0000),o:Magnaporthales(1.0000),f:Magnaporthaceae(1.0000),g:Pyricularia(1.0000)	-	-	-	-	-	-	-	Unassigned	-
Zotu1016	d:Fungi(1.0000),p:Basidiomycota(1.0000),c:Cystobasidiomycetes(0.9900),o:Cystobasidiales(0.9900),f:Cystobasidiaceae(0.9900),g:Cystobasidium(0.9900),s:Cystobasidium_slooffiae_SH194776.07FU(0.7500)	Cystobasidium	13	Pathotroph	Fungal Parasite	Facultative Yeast	NULL	Highly Probable	NULL	b'Kurtzman CP, et al. (eds.) 2011. The Yeasts, a Taxonomic Study. Fifth Edition. Vols 1-3. Elsevier, San Diego'
Zotu1017	d:Fungi(1.0000),p:Ascomycota(1.0000),c:Dothideomycetes(0.6100),o:Capnodiales(0.6000),f:Mycosphaerellaceae(0.5000),g:Mycosphaerella(0.5000)	-	-	-	-	-	-	-	Unassigned	-
Zotu1018	d:Fungi(1.0000),p:Basidiomycota(1.0000),c:Agaricomycetes(1.0000),o:Sebacinales(1.0000),f:Serendipitaceae(0.0100)	-	-	-	-	-	-	-	Unassigned	-
Zotu1019	d:Fungi(1.0000),p:Ascomycota(1.0000),c:Dothideomycetes(1.0000),o:Capnodiales(1.0000),f:Mycosphaerellaceae(1.0000),g:Zymoseptoria(0.9800),s:Zymoseptoria_halophila_SH195828.07FU(0.9600)	-	-	-	-	-	-	-	Unassigned	-
Zotu102	d:Fungi(1.0000),p:Ascomycota(0.9900),c:Dothideomycetes(0.0800),o:Pleosporales(0.0800),f:Periconiaceae(0.0700),g:Periconia(0.0700),s:Noosia_banksiae_SH020957.07FU(0.0100)	-	-	-	-	-	-	-	Unassigned	-
Zotu1020	d:Fungi(1.0000),p:Ascomycota(0.9500),c:Sordariomycetes(0.9500),o:Xylariales(0.9500),f:Amphisphaeriaceae(0.5200),g:Seiridium(0.2900),s:Seiridium_ceratosporum_SH630291.07FU(0.1800)	Seiridium	13	Pathotroph	Plant Pathogen	NULL	NULL	Probable	NULL	b'Tedersoo L, et al. 2014. Science 346:1256688'
Zotu1021	d:Fungi(1.0000),p:Basidiomycota(1.0000),c:Agaricomycetes(1.0000),o:Russulales(1.0000),f:Peniophoraceae(1.0000),g:Peniophora(0.9900),s:Peniophora_albobadia_SH188975.07FU(0.9900)	Peniophora	13	Pathotroph-Saprotroph	Plant Pathogen-Wood Saprotroph	Corticioid	White Rot	Probable	NULL	b'Tedersoo L, et al. 2014. Science 346:1256688'
Zotu1022	d:Fungi(1.0000),p:Basidiomycota(0.6200),c:Agaricomycetes(0.4100),o:Agaricales(0.2300),f:Bulleribasidiaceae(0.0900),g:Candida(0.0700),s:Hannaella_luteola_SH180500.07FU(0.0400)	-	-	-	-	-	-	-	Unassigned	-
Zotu1023	d:Fungi(1.0000),p:Ascomycota(1.0000),c:Sordariomycetes(0.7700),o:Diaporthales(0.7700),f:Diaporthaceae(0.2600),g:Diaporthe(0.2400),s:Plenodomus_destruens_SH185529.07FU(0.2300)	Plenodomus	13	Saprotroph	Undefined Saprotroph	NULL	NULL	Probable	NULL	b'Tedersoo L, et al. 2014. Science 346:1256688'
Zotu1024	d:Fungi(1.0000),p:Basidiomycota(0.8100),c:Agaricomycetes(0.8100),o:Russulales(0.7700),f:Peniophoraceae(0.7700),g:Peniophora(0.7300),s:Peniophora_lycii_SH496538.07FU(0.1400)	Peniophora	13	Pathotroph-Saprotroph	Plant Pathogen-Wood Saprotroph	Corticioid	White Rot	Probable	NULL	b'Tedersoo L, et al. 2014. Science 346:1256688'
Zotu1025	d:Fungi(1.0000),p:Basidiomycota(1.0000),c:Agaricomycetes(1.0000),o:Polyporales(1.0000),f:Coriolaceae(0.9000),g:Trametes(0.9000),s:Trametes_cubensis_SH197054.07FU(0.9000)	Trametes	13	Saprotroph	Wood Saprotroph	Polyporoid	White Rot	Highly Probable	NULL	b'Gilbertson RL, Ryvarden L. 1987-1987. North American Polypores. Fungiflora, Oslo'
Zotu1026	d:Fungi(1.0000),p:Ascomycota(1.0000),c:Dothideomycetes(0.5000),o:Pleosporales(0.5000),f:Phaeosphaeriaceae(0.5000),g:Parastagonospora(0.5000),s:Parastagonospora_avenae_SH005890.07FU(0.5000)	-	-	-	-	-	-	-	Unassigned	-
Zotu1027	d:Fungi(1.0000),p:Ascomycota(0.9500),c:Dothideomycetes(0.4700),o:Venturiales(0.1900),f:Dothideomycetes_fam_Incertae_sedis(0.1200),g:Heliocephala(0.0900),s:Heliocephala_natarajanii_SH468648.07FU(0.0900)	-	-	-	-	-	-	-	Unassigned	-
Zotu1028	d:Fungi(1.0000),p:Ascomycota(1.0000),c:Sordariomycetes(1.0000),o:Diaporthales(1.0000),f:Gnomoniaceae(1.0000),g:Cryptodiaporthe(0.3800),s:Ophiognomonia_asiatica_SH279983.07FU(0.1300)	Ophiognomonia	13	Pathotroph	Plant Pathogen	Microfungus	NULL	Highly Probable	See Marssoniella juglandis, Ophiognomonia leptostyla, and Syn. Gnomonia leptostyla; Causes leaf blotch and spots, also known as walnut anthracnose or walnut black spot (Sogonov et al. 2008)	b'Sogonov MV, et al. 2008. Studies in Mycology 62:1-79'
Zotu1029	d:Fungi(1.0000),p:Ascomycota(1.0000),c:Sordariomycetes(1.0000),o:Xylariales(1.0000),f:Apiosporaceae(1.0000),g:Arthrinium(1.0000),s:Arthrinium_rasikravindrae_SH211146.07FU(0.8000)	Arthrinium	13	Saprotroph	Undefined Saprotroph	NULL	NULL	Probable	NULL	b'Tedersoo L, et al. 2014. Science 346:1256688'
Zotu103	d:Fungi(1.0000),p:Ascomycota(0.9700),c:Dothideomycetes(0.9700),o:Pleosporales(0.9700),f:Sporormiaceae(0.9600),g:Preussia(0.9000),s:Preussia_persica_SH184177.07FU(0.5500)	Preussia	13	Saprotroph	Undefined Saprotroph	NULL	NULL	Probable	NULL	b'Tedersoo L, et al. 2014. Science 346:1256688'
Zotu1030	d:Fungi(1.0000),p:Ascomycota(0.9600),c:Dothideomycetes(0.9600),o:Capnodiales(0.2300),f:Cladosporiaceae(0.2300),g:Rachicladosporium(0.2300),s:Rachicladosporium_luculiae_SH018822.07FU(0.1400)	-	-	-	-	-	-	-	Unassigned	-
Zotu1031	d:Fungi(1.0000),p:Ascomycota(0.9900),c:Sordariomycetes(0.9900),o:Xylariales(0.9800),f:Amphisphaeriaceae(0.8100),g:Seimatosporium(0.3900),s:Seimatosporium_discosioides_SH206672.07FU(0.2000)	Seimatosporium	13	Pathotroph	Plant Pathogen	Microfungus	NULL	Probable	Some species causing leaf spot disease (www.apsnet.org)	b'Tedersoo L, et al. 2014. Science 346:1256688; http://www.apsnet.org/publications/commonnames/Pages/default.aspx'
Zotu1032	d:Fungi(1.0000),p:Ascomycota(1.0000),c:Sordariomycetes(1.0000)	-	-	-	-	-	-	-	Unassigned	-
Zotu1033	d:Fungi(1.0000),p:Ascomycota(1.0000),c:Sordariomycetes(1.0000),o:Diaporthales(1.0000),f:Diaporthaceae(0.8600),g:Diaporthe(0.8600),s:Diaporthe_convolvuli_SH495082.07FU(0.7200)	Diaporthe	13	Pathotroph-Symbiotroph	Endophyte-Plant Pathogen	Microfungus	NULL	Possible	NULL	b'Tedersoo L, et al. 2014. Science 346:1256688'
Zotu1034	d:Fungi(1.0000),p:Ascomycota(1.0000),c:Dothideomycetes(0.9800),o:Pleosporales(0.9800),f:Lentitheciaceae(0.9100),g:Keissleriella(0.9100),s:Keissleriella_quadriseptata_SH522344.07FU(0.9100)	Keissleriella	13	Saprotroph	Undefined Saprotroph	NULL	NULL	Probable	NULL	b'Tedersoo L, et al. 2014. Science 346:1256688'
Zotu1035	d:Fungi(1.0000),p:Basidiomycota(1.0000),c:Agaricomycetes(1.0000),o:Corticiales(0.0300),f:Corticiaceae(0.0300),g:Xylodon(0.0200),s:Xylodon_sambuci_SH185877.07FU(0.0200)	Xylodon	13	Saprotroph	Undefined Saprotroph	Corticioid	White Rot	Probable	NULL	b'Tedersoo L, et al. 2014. Science 346:1256688'
Zotu1036	d:Fungi(1.0000),p:Ascomycota(0.6700),c:Dothideomycetes(0.6600),o:Pleosporales(0.6600),f:Phaeosphaeriaceae(0.4300),g:Septoriella(0.0300),s:Septoriella_phragmitis_SH238525.07FU(0.0300)	-	-	-	-	-	-	-	Unassigned	-
Zotu1037	d:Fungi(1.0000),p:Basidiomycota(1.0000),c:Agaricomycetes(1.0000),o:Russulales(1.0000),f:Peniophoraceae(1.0000),g:Peniophora(0.9900),s:Peniophora_albobadia_SH188975.07FU(0.9900)	Peniophora	13	Pathotroph-Saprotroph	Plant Pathogen-Wood Saprotroph	Corticioid	White Rot	Probable	NULL	b'Tedersoo L, et al. 2014. Science 346:1256688'
Zotu1038	d:Fungi(1.0000),p:Ascomycota(1.0000),c:Sordariomycetes(0.9900),o:Hypocreales(0.9900),f:Bionectriaceae(0.4800),g:Synnemellisia(0.3400),s:Selinia_pulchra_SH026841.07FU(0.1000)	Selinia	13	Saprotroph	Dung Saprotroph-Undefined Saprotroph	NULL	NULL	Highly Probable	NULL	b'Bell A. 1983. Dung Fungi: An Illustrated Guide to Coprophilous Fungi in New Zealand. Victoria University Press, Wellington; Tedersoo L, et al. 2014. Science 346:1256688'
Zotu1039	d:Fungi(1.0000),p:Basidiomycota(1.0000),c:Agaricomycetes(1.0000),o:Polyporales(1.0000),f:Irpicaceae(0.8400),g:Ceriporia(0.5400),s:Ceriporia_lacerata_SH185165.07FU(0.5400)	Ceriporia	13	Saprotroph	Wood Saprotroph	Corticioid	White Rot	Highly Probable	NULL	b'Tedersoo L, et al. 2014. Science 346:1256688'
Zotu104	d:Fungi(1.0000),p:Ascomycota(0.6000),c:Dothideomycetes(0.6000),o:Pleosporales(0.4000),f:Sporormiaceae(0.4000),g:Preussia(0.4000),s:Preussia_dubia_SH184197.07FU(0.4000)	Preussia	13	Saprotroph	Undefined Saprotroph	NULL	NULL	Probable	NULL	b'Tedersoo L, et al. 2014. Science 346:1256688'
Zotu1040	d:Fungi(1.0000),p:Ascomycota(1.0000),c:Taphrinomycetes(1.0000),o:Taphrinales(1.0000),f:Taphrinaceae(1.0000),g:Taphrina(1.0000),s:Taphrina_americana_SH193611.07FU(0.0100)	Taphrina	13	Pathotroph	Plant Pathogen	NULL	NULL	Probable	NULL	b'http://www.apsnet.org/publications/commonnames/Pages/default.aspx'
Zotu1041	d:Fungi(1.0000),p:Basidiomycota(1.0000),c:Agaricomycetes(1.0000),o:Auriculariales(1.0000),f:Exidiaceae(0.8800),g:Exidia(0.8800),s:Exidia_glandulosa_SH203201.07FU(0.8800)	Exidia	13	Saprotroph-Symbiotroph	Endophyte-Undefined Saprotroph	Tremelloid	NULL	Probable	NULL	b'Tedersoo L, et al. 2014. Science 346:1256688 (doi:10.1126/science.1256688); David AS, et al. 2016. Microbial Ecology 71:912-926'
Zotu1042	d:Fungi(1.0000),p:Ascomycota(1.0000),c:Dothideomycetes(1.0000)	-	-	-	-	-	-	-	Unassigned	-
Zotu1043	d:Fungi(1.0000),p:Ascomycota(1.0000),c:Sordariomycetes(1.0000),o:Glomerellales(0.9900),f:Plectosphaerellaceae(0.9900),g:Plectosphaerella(0.9900),s:Plectosphaerella_cucumerina_SH219563.07FU(0.7100)	Plectosphaerella	13	Pathotroph	Plant Pathogen	NULL	NULL	Probable	NULL	b'Tedersoo L, et al. 2014. Science 346:1256688'
Zotu1044	d:Fungi(1.0000),p:Ascomycota(1.0000),c:Sordariomycetes(1.0000),o:Sordariomycetes_ord_Incertae_sedis(0.9100),f:Sordariomycetes_fam_Incertae_sedis(0.9100),g:Xylomelasma(0.9100)	-	-	-	-	-	-	-	Unassigned	-
Zotu1045	d:Fungi(1.0000),p:Ascomycota(0.8700),c:Dothideomycetes(0.6500),o:Pleosporales(0.6400),f:Didymosphaeriaceae(0.3500),g:Paraconiothyrium(0.3400),s:Paraconiothyrium_hawaiiense_SH186963.07FU(0.1100)	Paraconiothyrium	13	Saprotroph	Undefined Saprotroph	NULL	NULL	Probable	NULL	b'Tedersoo L, et al. 2014. Science 346:1256688'
Zotu1046	d:Fungi(1.0000),p:Basidiomycota(1.0000),c:Agaricomycetes(1.0000),o:Russulales(1.0000),f:Auriscalpiaceae(1.0000),g:Lentinellus(1.0000),s:Lentinellus_castoreus_SH180214.07FU(0.3400)	Lentinellus	13	Saprotroph	Undefined Saprotroph	Agaricoid	White Rot	Probable	NULL	b'Tedersoo L, et al. 2014. Science 346:1256688'
Zotu1047	d:Fungi(1.0000),p:Ascomycota(1.0000),c:Dothideomycetes(1.0000),o:Venturiales(1.0000),f:Venturiaceae(0.9700),g:Venturia(0.1800),s:Venturia_atriseda_SH219626.07FU(0.1200)	Venturia	13	Pathotroph	Plant Pathogen	NULL	NULL	Probable	NULL	b'Tedersoo L, et al. 2014. Science 346:1256688 (doi:10.1126/science.1256688)'
Zotu1048	d:Fungi(1.0000),p:Ascomycota(0.2000),c:Dothideomycetes(0.1800),o:Botryosphaeriales(0.0100)	-	-	-	-	-	-	-	Unassigned	-
Zotu1049	d:Fungi(1.0000),p:Ascomycota(1.0000),c:Sordariomycetes(1.0000),o:Glomerellales(1.0000),f:Glomerellaceae(1.0000),g:Colletotrichum(1.0000),s:Colletotrichum_novae-zelandiae_SH494406.07FU(0.3700)	Colletotrichum	13	Pathotroph-Symbiotroph	Endophyte-Plant Pathogen	Microfungus	NULL	Probable	NULL	b'Costa IPMW, et al. 2012. Mycotaxon 119:26; Tedersoo L, et al. 2014. Science 346:1256688; http://www.apsnet.org/publications/commonnames/Pages/default.aspx'
Zotu105	d:Fungi(1.0000),p:Ascomycota(0.9900),c:Lecanoromycetes(0.9700),o:Ostropales(0.9700),f:Stictidaceae(0.9700),g:Glomerobolus(0.9000),s:Glomerobolus_gelineus_SH458323.07FU(0.9000)	Glomerobolus	13	Saprotroph	Undefined Saprotroph	NULL	NULL	Probable	NULL	b'Tedersoo L, et al. 2014. Science 346:1256688'
Zotu1050	d:Fungi(1.0000),p:Basidiomycota(1.0000),c:Agaricomycetes(1.0000),o:Agaricales(1.0000),f:Psathyrellaceae(1.0000),g:Coprinellus(1.0000),s:Coprinellus_heptemerus_SH220397.07FU(1.0000)	Coprinellus	13	Saprotroph	Undefined Saprotroph	NULL	NULL	Probable	NULL	b'Tedersoo L, et al. 2014. Science 346:1256688'
Zotu1051	d:Fungi(1.0000),p:Ascomycota(1.0000),c:Dothideomycetes(1.0000),o:Capnodiales(1.0000),f:Mycosphaerellaceae(1.0000),g:Zymoseptoria(0.8700),s:Zymoseptoria_halophila_SH195828.07FU(0.5300)	-	-	-	-	-	-	-	Unassigned	-
Zotu1052	d:Fungi(1.0000),p:Ascomycota(0.9900),c:Sordariomycetes(0.9900),o:Xylariales(0.9600),f:Xylariaceae(0.9600),g:Hypoxylon(0.8800),s:Hypoxylon_lenormandii_SH527173.07FU(0.6800)	Hypoxylon	13	Saprotroph	Undefined Saprotroph	NULL	NULL	Probable	NULL	b'Tedersoo L, et al. 2014. Science 346:1256688'
Zotu1053	d:Fungi(1.0000),p:Basidiomycota(1.0000),c:Agaricomycetes(1.0000),o:Agaricales(1.0000),f:Strophariaceae(1.0000),g:Hypholoma(1.0000),s:Hypholoma_fasciculare_SH201439.07FU(1.0000)	Hypholoma	13	Saprotroph	Undefined Saprotroph	Agaricoid	White Rot	Probable	NULL	b'Tedersoo L, et al. 2014. Science 346:1256688'
Zotu1054	d:Fungi(1.0000),p:Basidiomycota(1.0000),c:Microbotryomycetes(0.9400),o:Sporidiobolales(0.9400),f:Sporidiobolaceae(0.9400),g:Sporobolomyces(0.9400),s:Sporobolomyces_symmetricus_SH205939.07FU(0.9400)	Sporobolomyces	13	Pathotroph-Saprotroph	Fungal Parasite-Litter Saprotroph	Yeast	NULL	Probable	NULL	b'Tedersoo L, et al. 2014. Science 346:1256688; Nagy GL, et al. 2014. Nature Communications 5:4471; Purahong W, et al. 2016. Molecular Ecology 25:4059-4074'
Zotu1055	d:Fungi(1.0000),p:Basidiomycota(0.9300),c:Agaricomycetes(0.9300),o:Russulales(0.8000),f:Peniophoraceae(0.0500),g:Peniophora(0.0400),s:Peniophora_incarnata_SH188993.07FU(0.0200)	Peniophora	13	Pathotroph-Saprotroph	Plant Pathogen-Wood Saprotroph	Corticioid	White Rot	Probable	NULL	b'Tedersoo L, et al. 2014. Science 346:1256688'
Zotu1056	d:Fungi(1.0000),p:Ascomycota(1.0000),c:Sordariomycetes(0.9900),o:Xylariales(0.9900),f:Xylariaceae(0.7700),g:Hypoxylon(0.7700),s:Hypoxylon_begae_SH198484.07FU(0.0200)	Hypoxylon	13	Saprotroph	Undefined Saprotroph	NULL	NULL	Probable	NULL	b'Tedersoo L, et al. 2014. Science 346:1256688'
Zotu1057	d:Fungi(1.0000),p:Ascomycota(1.0000),c:Dothideomycetes(1.0000),o:Dothideales(1.0000),f:Dothioraceae(0.9700),g:Pringsheimia(0.6200),s:Pringsheimia_smilacis_SH221214.07FU(0.6200)	Pringsheimia	13	Saprotroph	Undefined Saprotroph	NULL	NULL	Probable	NULL	b'Tedersoo L, et al. 2014. Science 346:1256688'
Zotu1058	d:Fungi(1.0000)	-	-	-	-	-	-	-	Unassigned	-
Zotu1059	d:Fungi(1.0000),p:Ascomycota(0.5100),c:Dothideomycetes(0.5100)	-	-	-	-	-	-	-	Unassigned	-
Zotu106	d:Fungi(1.0000),p:Ascomycota(1.0000),c:Sordariomycetes(0.2800),o:Diaporthales(0.2800),f:Diaporthaceae(0.1100),g:Diaporthe(0.1100),s:Diaporthe_convolvuli_SH495082.07FU(0.0400)	Diaporthe	13	Pathotroph-Symbiotroph	Endophyte-Plant Pathogen	Microfungus	NULL	Possible	NULL	b'Tedersoo L, et al. 2014. Science 346:1256688'
Zotu1060	d:Fungi(1.0000),p:Ascomycota(1.0000),c:Sordariomycetes(0.9200),o:Diaporthales(0.9200),f:Diaporthaceae(0.4700),g:Diaporthe(0.4700),s:Diaporthe_convolvuli_SH495082.07FU(0.1700)	Diaporthe	13	Pathotroph-Symbiotroph	Endophyte-Plant Pathogen	Microfungus	NULL	Possible	NULL	b'Tedersoo L, et al. 2014. Science 346:1256688'
Zotu1061	d:Fungi(1.0000),p:Ascomycota(0.4300),c:Dothideomycetes(0.4300),o:Capnodiales(0.4300),f:Teratosphaeriaceae(0.0100),g:Capnobotryella(0.0100)	-	-	-	-	-	-	-	Unassigned	-
Zotu1062	d:Fungi(1.0000),p:Ascomycota(0.5000),c:Sordariomycetes(0.4600),o:Hypocreales(0.3800),f:Nectriaceae(0.3800),g:Fusarium(0.1000)	-	-	-	-	-	-	-	Unassigned	-
Zotu1063	d:Fungi(1.0000),p:Ascomycota(1.0000),c:Dothideomycetes(1.0000),o:Pleosporales(1.0000),f:Pleosporales_fam_Incertae_sedis(0.0400),g:Nigrograna(0.0400)	-	-	-	-	-	-	-	Unassigned	-
Zotu1064	d:Fungi(1.0000),p:Basidiomycota(1.0000),c:Malasseziomycetes(1.0000),o:Malasseziales(1.0000),f:Malasseziaceae(1.0000),g:Malassezia(1.0000),s:Malassezia_globosa_SH184036.07FU(0.3700)	Malassezia	13	Pathotroph-Saprotroph	Animal Pathogen-Undefined Saprotroph	Facultative Yeast	NULL	Probable	A lipid-dependent fungus growing on the sebaceous areas of human skin that may cause or exacerbate several skin diseases (Pityrosporum is a synonym that has been used for the yeast forms)	b'Findley K, et al. 2013. Nature 498:367-370'
Zotu1065	d:Fungi(1.0000),p:Basidiomycota(0.4000),c:Tremellomycetes(0.4000),o:Tremellales(0.4000),f:Bulleribasidiaceae(0.4000),g:Dioszegia(0.4000),s:Dioszegia_hungarica_SH182099.07FU(0.4000)	Dioszegia	13	Saprotroph	Undefined Saprotroph	Yeast	NULL	Probable	The Dioszegia subclade sensu Inacio (Inacio et al. 20015) is characterized by orange-yellow or orange to deep orange colonies. Isolated from plant leaves and soil.	b'Takashima M, et al. 2011 International Journal of Systematic and Evolutionary Microbiology 61:1736-1739'
Zotu1066	d:Fungi(1.0000),p:Ascomycota(1.0000),c:Dothideomycetes(1.0000),o:Pleosporales(0.7900),f:Lophiostomataceae(0.7600),g:Lophiostoma(0.7000),s:Lophiostoma_macrostomoides_SH004352.07FU(0.1900)	Lophiostoma	13	Saprotroph	Undefined Saprotroph	NULL	NULL	Probable	NULL	b'Tedersoo L, et al. 2014. Science 346:1256688'
Zotu1067	d:Fungi(1.0000),p:Basidiomycota(1.0000),c:Agaricomycetes(1.0000),o:Russulales(1.0000),f:Peniophoraceae(1.0000),g:Peniophora(0.9900),s:Peniophora_albobadia_SH188975.07FU(0.9900)	Peniophora	13	Pathotroph-Saprotroph	Plant Pathogen-Wood Saprotroph	Corticioid	White Rot	Probable	NULL	b'Tedersoo L, et al. 2014. Science 346:1256688'
Zotu1068	d:Fungi(1.0000),p:Basidiomycota(1.0000),c:Agaricomycetes(0.9600),o:Polyporales(0.6800),f:Polyporaceae(0.4500),g:Physisporinus(0.4200),s:Rigidoporus_sanguinolentus_SH189954.07FU(0.2100)	Rigidoporus	13	Saprotroph	Wood Saprotroph	Polyporoid	White Rot	Highly Probable	NULL	b'Gilbertson RL, Ryvarden L. 1987-1987. North American Polypores. Fungiflora, Oslo'
Zotu1069	d:Fungi(1.0000),p:Ascomycota(1.0000),c:Dothideomycetes(0.3900),o:Pleosporales(0.3900),f:Didymellaceae(0.3900),g:Phoma(0.3900)	-	-	-	-	-	-	-	Unassigned	-
Zotu107	d:Fungi(1.0000),p:Ascomycota(1.0000),c:Dothideomycetes(1.0000),o:Capnodiales(1.0000),f:Mycosphaerellaceae(1.0000),g:Pseudocercospora(0.9000),s:Pseudocercospora_madagascariensis_SH278864.07FU(0.4500)	Pseudocercospora	13	Pathotroph	Plant Pathogen	Microfungus	NULL	Probable	NULL	b'Tedersoo L, et al. 2014. Science 346:1256688'
Zotu1070	d:Fungi(1.0000),p:Ascomycota(1.0000),c:Dothideomycetes(1.0000),o:Myriangiales(1.0000),f:Myriangiaceae(0.9700),g:Myriangium(0.9400)	-	-	-	-	-	-	-	Unassigned	-
Zotu1071	d:Fungi(1.0000),p:Basidiomycota(0.0100),c:Agaricomycetes(0.0100)	-	-	-	-	-	-	-	Unassigned	-
Zotu1072	d:Fungi(1.0000),p:Basidiomycota(1.0000),c:Tremellomycetes(1.0000),o:Tremellales(1.0000),f:Bulleribasidiaceae(1.0000),g:Dioszegia(1.0000),s:Dioszegia_hungarica_SH182099.07FU(1.0000)	Dioszegia	13	Saprotroph	Undefined Saprotroph	Yeast	NULL	Probable	The Dioszegia subclade sensu Inacio (Inacio et al. 20015) is characterized by orange-yellow or orange to deep orange colonies. Isolated from plant leaves and soil.	b'Takashima M, et al. 2011 International Journal of Systematic and Evolutionary Microbiology 61:1736-1739'
Zotu1073	d:Fungi(1.0000),p:Basidiomycota(1.0000),c:Agaricomycetes(1.0000),o:Agaricales(1.0000),f:Tricholomataceae(0.9900),g:Resupinatus(0.9900),s:Resupinatus_alboniger_SH526692.07FU(0.9900)	Resupinatus	13	Saprotroph	Undefined Saprotroph	Corticioid	White Rot	Probable	NULL	b'Tedersoo L, et al. 2014. Science 346:1256688'
Zotu1074	d:Fungi(1.0000),p:Ascomycota(0.8600),c:Dothideomycetes(0.6300),o:Pleosporales(0.6100),f:Didymosphaeriaceae(0.3200),g:Paraconiothyrium(0.2900),s:Paraconiothyrium_hawaiiense_SH186963.07FU(0.1300)	Paraconiothyrium	13	Saprotroph	Undefined Saprotroph	NULL	NULL	Probable	NULL	b'Tedersoo L, et al. 2014. Science 346:1256688'
Zotu1075	d:Fungi(1.0000),p:Ascomycota(0.9500),c:Sordariomycetes(0.9400),o:Xylariales(0.8200),f:Amphisphaeriaceae(0.1600),g:Lepteutypa(0.0900),s:Lepteutypa_fuckelii_SH530116.07FU(0.0900)	Lepteutypa	13	Pathotroph	Plant Pathogen	NULL	NULL	Probable	NULL	b'http://www.apsnet.org/publications/commonnames/Pages/default.aspx'
Zotu1076	d:Fungi(1.0000),p:Basidiomycota(1.0000),c:Agaricomycetes(1.0000),o:Cantharellales(0.0200)	-	-	-	-	-	-	-	Unassigned	-
Zotu1077	d:Fungi(1.0000),p:Ascomycota(1.0000),c:Sordariomycetes(0.8900),o:Diaporthales(0.8900),f:Diaporthaceae(0.4200),g:Diaporthe(0.4200),s:Diaporthe_convolvuli_SH495082.07FU(0.2100)	Diaporthe	13	Pathotroph-Symbiotroph	Endophyte-Plant Pathogen	Microfungus	NULL	Possible	NULL	b'Tedersoo L, et al. 2014. Science 346:1256688'
Zotu1078	d:Fungi(1.0000),p:Ascomycota(0.9300),c:Dothideomycetes(0.7200),o:Pleosporales(0.6900),f:Melanommataceae(0.3600),g:Byssosphaeria(0.1300),s:Byssosphaeria_musae_SH494933.07FU(0.1300)	Byssosphaeria	13	Saprotroph	Undefined Saprotroph	NULL	NULL	Probable	NULL	b'Tedersoo L, et al. 2014. Science 346:1256688'
Zotu1079	d:Fungi(1.0000),p:Ascomycota(1.0000),c:Leotiomycetes(1.0000),o:Helotiales(1.0000),f:Hyaloscyphaceae(1.0000),g:Proliferodiscus(1.0000)	-	-	-	-	-	-	-	Unassigned	-
Zotu108	d:Fungi(1.0000),p:Ascomycota(1.0000),c:Saccharomycetes(1.0000),o:Saccharomycetales(1.0000),f:Phaffomycetaceae(1.0000),g:Cyberlindnera(1.0000),s:Cyberlindnera_jadinii_SH191159.07FU(1.0000)	-	-	-	-	-	-	-	Unassigned	-
Zotu1080	d:Fungi(1.0000),p:Ascomycota(0.8000),c:Dothideomycetes(0.8000),o:Capnodiales(0.8000)	-	-	-	-	-	-	-	Unassigned	-
Zotu1081	d:Fungi(1.0000),p:Basidiomycota(1.0000),c:Agaricomycetes(1.0000),o:Russulales(1.0000),f:Peniophoraceae(1.0000),g:Peniophora(0.2800),s:Peniophora_albobadia_SH188975.07FU(0.2700)	Peniophora	13	Pathotroph-Saprotroph	Plant Pathogen-Wood Saprotroph	Corticioid	White Rot	Probable	NULL	b'Tedersoo L, et al. 2014. Science 346:1256688'
Zotu1082	d:Fungi(1.0000),p:Basidiomycota(0.9900),c:Agaricomycetes(0.9900),o:Polyporales(0.9900),f:Coriolaceae(0.8500),g:Antrodiella(0.8500),s:Antrodiella_brasiliensis_SH011845.07FU(0.8500)	Antrodiella	13	Saprotroph	Wood Saprotroph	Corticioid	White Rot	Highly Probable	NULL	b'Gilbertson RL, Ryvarden L. 1987-1987. North American Polypores. Fungiflora, Oslo'
Zotu1083	d:Fungi(1.0000),p:Basidiomycota(1.0000),c:Tremellomycetes(1.0000),o:Trichosporonales(1.0000),f:Trichosporonaceae(1.0000),g:Cutaneotrichosporon(0.6800),s:Cutaneotrichosporon_dermatis_SH262856.07FU(0.5500)	Cutaneotrichosporon	13	Pathotroph	Animal Pathogen	Yeast	NULL	Possible	Pathogenic to humans	b'Nath R, et al. 2018. Mycopathologia 183:585 (https://doi.org/10.1007/s11046-017-0231-8)'
Zotu1084	d:Fungi(1.0000),p:Basidiomycota(0.9600),c:Agaricomycetes(0.9600),o:Trechisporales(0.9600),f:Hydnodontaceae(0.8300),g:Trechispora(0.8300),s:Trechispora_nivea_SH213579.07FU(0.1300)	Trechispora	13	Saprotroph	Wood Saprotroph	Corticioid	White Rot	Highly Probable	NULL	b'Gilbertson RL, Ryvarden L. 1987-1987. North American Polypores. Fungiflora, Oslo; Rinaldi AC, et al. 2008. Fungal Diversity 33:1-45 Uncertain.; Tedersoo L, et al. 2010. Mycorrhiza 20:217-263 (not ECM).'
Zotu1085	d:Fungi(1.0000),p:Ascomycota(0.7400),c:Dothideomycetes(0.7400),o:Dothideales(0.3800),f:Dothideaceae(0.3600),g:Endoconidioma(0.3200),s:Endoconidioma_populi_SH206435.07FU(0.3000)	Endoconidioma	13	Saprotroph	Undefined Saprotroph	NULL	NULL	Probable	NULL	b'Tedersoo L, et al. 2014. Science 346:1256688'
Zotu1086	d:Fungi(1.0000),p:Ascomycota(1.0000),c:Sordariomycetes(1.0000),o:Xylariales(1.0000),f:Diatrypaceae(1.0000)	-	-	-	-	-	-	-	Unassigned	-
Zotu1087	d:Fungi(1.0000)	-	-	-	-	-	-	-	Unassigned	-
Zotu1088	d:Fungi(1.0000),p:Ascomycota(1.0000),c:Dothideomycetes(0.9900),o:Pleosporales(0.9900),f:Pleosporaceae(0.9900),g:Drechslera(0.3200),s:Drechslera_catenaria_SH629878.07FU(0.1800)	Drechslera	13	Pathotroph	Plant Pathogen	NULL	NULL	Probable	NULL	b'Tedersoo L, et al. 2014. Science 346:1256688'
Zotu1089	d:Fungi(1.0000),p:Basidiomycota(1.0000),c:Agaricomycetes(1.0000),o:Hymenochaetales(1.0000),f:Hymenochaetales_fam_Incertae_sedis(1.0000),g:Peniophorella(1.0000),s:Peniophorella_pallida_SH493272.07FU(0.6500)	Peniophorella	13	Saprotroph	Undefined Saprotroph	Corticioid	White Rot	Probable	NULL	b'Tedersoo L, et al. 2014. Science 346:1256688'
Zotu109	d:Fungi(1.0000),p:Ascomycota(1.0000),c:Dothideomycetes(1.0000),o:Myriangiales(1.0000),f:Elsinoaceae(1.0000),g:Sphaceloma(0.0400),s:Sphaceloma_tectificae_SH013191.07FU(0.0300)	Sphaceloma	13	Pathotroph	Plant Pathogen	NULL	NULL	Probable	NULL	b'Tedersoo L, et al. 2014. Science 346:1256688'
Zotu1090	d:Fungi(1.0000),p:Ascomycota(0.9900),c:Eurotiomycetes(0.8200),o:Chaetothyriales(0.8200),f:Trichomeriaceae(0.4700),g:Trichomerium(0.4100),s:Trichomerium_dioscoreae_SH186766.07FU(0.4000)	Trichomerium	13	Symbiotroph	Endophyte	NULL	NULL	Probable	NULL	b'Tedersoo L, et al. 2014. Science 346:1256688'
Zotu1091	d:Fungi(1.0000),p:Ascomycota(1.0000),c:Dothideomycetes(0.6800),o:Pleosporales(0.6700),f:Thyridariaceae(0.1800),g:Parathyridaria(0.0800),s:Parathyridaria_robiniae_SH497177.07FU(0.0800)	-	-	-	-	-	-	-	Unassigned	-
Zotu1092	d:Fungi(1.0000),p:Ascomycota(1.0000),c:Leotiomycetes(1.0000),o:Helotiales(0.9900),f:Hyaloscyphaceae(0.9900),g:Lachnum(0.9100),s:Lachnum_virgineum_SH201663.07FU(0.6400)	Lachnum	13	Saprotroph	Undefined Saprotroph	Microfungus	NULL	Probable	NULL	b'Tedersoo L, et al. 2014. Science 346:1256688'
Zotu1093	d:Fungi(1.0000),p:Ascomycota(1.0000),c:Sordariomycetes(1.0000),o:Hypocreales(0.9900),f:Nectriaceae(0.0500),g:Acremonium(0.0400),s:Dialonectria_ullevolea_SH207581.07FU(0.0200)	Dialonectria	13	Pathotroph	Fungal Parasite	NULL	NULL	Probable	NULL	b'Tedersoo L, et al. 2014. Science 346:1256688'
Zotu1094	d:Fungi(1.0000),p:Basidiomycota(0.2800),c:Agaricomycetes(0.2500),o:Agaricales(0.1800),f:Cortinariaceae(0.0700),g:Cortinarius(0.0400),s:Symbiotaphrina_buchneri_SH643910.07FU(0.0300)	Symbiotaphrina	13	Symbiotroph	Animal Endosymbiont	NULL	NULL	Probable	NULL	b'Tedersoo L, et al. 2014. Science 346:1256688'
Zotu1095	d:Fungi(1.0000),p:Ascomycota(0.9600),c:Leotiomycetes(0.5300),o:Erysiphales(0.2600),f:Erysiphaceae(0.2600),g:Symbiotaphrina(0.1600),s:Symbiotaphrina_buchneri_SH643910.07FU(0.1600)	Symbiotaphrina	13	Symbiotroph	Animal Endosymbiont	NULL	NULL	Probable	NULL	b'Tedersoo L, et al. 2014. Science 346:1256688'
Zotu1096	d:Fungi(1.0000),p:Basidiomycota(1.0000),c:Malasseziomycetes(1.0000),o:Malasseziales(1.0000),f:Malasseziaceae(1.0000),g:Malassezia(1.0000),s:Malassezia_globosa_SH184032.07FU(0.6100)	Malassezia	13	Pathotroph-Saprotroph	Animal Pathogen-Undefined Saprotroph	Facultative Yeast	NULL	Probable	A lipid-dependent fungus growing on the sebaceous areas of human skin that may cause or exacerbate several skin diseases (Pityrosporum is a synonym that has been used for the yeast forms)	b'Findley K, et al. 2013. Nature 498:367-370'
Zotu1097	d:Fungi(1.0000),p:Ascomycota(1.0000),c:Leotiomycetes(0.9900),o:Helotiales(0.9900),f:Sclerotiniaceae(0.5500),g:Torrendiella(0.2600),s:Torrendiella_ciliata_SH002192.07FU(0.2600)	Torrendiella	13	Saprotroph	Undefined Saprotroph	NULL	NULL	Probable	NULL	b'Tedersoo L, et al. 2014. Science 346:1256688'
Zotu1098	d:Fungi(1.0000),p:Ascomycota(1.0000),c:Sordariomycetes(1.0000),o:Diaporthales(1.0000),f:Gnomoniaceae(1.0000),g:Alnecium(0.4700),s:Alnecium_auctum_SH497067.07FU(0.4700)	Alnecium	13	Saprotroph	Plant Saprotroph	Microfungus	NULL	Highly Probable	On branches of Alnus glutinosa (Voglmayr & Jaklitsch 2014)	b'Voglmayr H, Jaklitsch W. 2014. Persoonia 33:61-82'
Zotu1099	d:Fungi(1.0000),p:Ascomycota(1.0000),c:Saccharomycetes(1.0000),o:Saccharomycetales(1.0000)	-	-	-	-	-	-	-	Unassigned	-
Zotu11	d:Fungi(1.0000),p:Ascomycota(1.0000),c:Dothideomycetes(1.0000),o:Capnodiales(1.0000),f:Cladosporiaceae(1.0000),g:Toxicocladosporium(1.0000),s:Toxicocladosporium_rubrigenum_SH202299.07FU(0.7300)	Toxicocladosporium	13	Pathotroph-Symbiotroph	Endophyte-Plant Pathogen	Microfungus	NULL	Probable	Isolated from leaves of Posoqueria and Eucalyptus camaldulensis (occurring within a single small lesion) as well as moldy paint	b'Crous PW, et al. 2009. Persoonia 22:83-94'
Zotu110	d:Fungi(1.0000),p:Ascomycota(0.7800),c:Dothideomycetes(0.6700),o:Pleosporales(0.5600),f:Massarinaceae(0.1700),g:Massarina(0.0800),s:Massarina_eburnea_SH180773.07FU(0.0600)	Massarina	13	Pathotroph-Saprotroph	Plant Pathogen-Undefined Saprotroph	Microfungus	NULL	Probable	NULL	b'Tedersoo L, et al. 2014. Science 346:1256688'
Zotu1100	d:Fungi(1.0000),p:Ascomycota(0.9000),c:Leotiomycetes(0.8700),o:Helotiales(0.8000),f:Vibrisseaceae(0.4700),g:Phialocephala(0.1800),s:Phialocephala_fortinii_SH630240.07FU(0.0600)	Phialocephala	13	Symbiotroph	Endophyte	NULL	NULL	Highly Probable	Dark Septate Endophyte, known from plant roots.	b'Newsham 2011. New Phytologist 190:783-793 (as DSE)'
Zotu1101	d:Fungi(1.0000),p:Ascomycota(1.0000),c:Dothideomycetes(0.5500),o:Botryosphaeriales(0.5500),f:Phyllostictaceae(0.5500),g:Phyllosticta(0.5500),s:Phyllosticta_papayae_SH628963.07FU(0.5500)	Phyllosticta	13	Pathotroph-Saprotroph-Symbiotroph	Endophyte-Plant Pathogen-Wood Saprotroph	Microfungus	Soft Rot	Highly Probable	NULL	b'Seehann G, et al. 1975. List of Fungi in Soft-Rot Tissue Tests. Institute fur Holzbiologie und Holzschutz, Bundesforschungsanstalt fur Forst - und Holzwirtshaft, Hamburg - Lohbrugge, Germany; Tedersoo L, et al. 2014. Science 346:1256688; Christian N, et al. 2016. Microbial Ecology 72:621-632'
Zotu1102	d:Fungi(1.0000),p:Ascomycota(0.8900),c:Dothideomycetes(0.8100),o:Pleosporales(0.8100),f:Pleosporaceae(0.5200),g:Bipolaris(0.2400),s:Bipolaris_microlaenae_SH187564.07FU(0.1400)	Bipolaris	13	Pathotroph	Plant Pathogen	NULL	NULL	Probable	NULL	b'Tedersoo L, et al. 2014. Science 346:1256688'
Zotu1103	d:Fungi(1.0000),p:Ascomycota(0.7600),c:Dothideomycetes(0.0600),o:Capnodiales(0.0300),f:Parmeliaceae(0.0200),g:Ramalina(0.0100),s:Golovinomyces_riedlianus_SH210843.07FU(0.0100)	Golovinomyces	13	Pathotroph	Plant Pathogen	NULL	NULL	Probable	NULL	b'Tedersoo L, et al. 2014. Science 346:1256688'
Zotu1104	d:Fungi(1.0000),p:Ascomycota(0.9600),c:Ascomycota_cls_Incertae_sedis(0.4900),o:Ascomycota_ord_Incertae_sedis(0.4900),f:Ascomycota_fam_Incertae_sedis(0.4900),g:Alatosessilispora(0.4900),s:Alatosessilispora_bibrachiata_SH493603.07FU(0.4900)	Alatosessilispora	13	Symbiotroph	Epiphyte	Microfungus	NULL	Possible	Epiphyte isolated in the rain drops from intact leaf-surface (Ando & Tubaki 1984)	b'Ando K, Tubaki K. 1984. Transactions of the Mycological Society of Japan 25:21-37'
Zotu1105	d:Fungi(1.0000),p:Ascomycota(0.8400),c:Dothideomycetes(0.8300),o:Pleosporales(0.8300),f:Phaeosphaeriaceae(0.7300),g:Septoriella(0.0300),s:Septoriella_phragmitis_SH238525.07FU(0.0300)	-	-	-	-	-	-	-	Unassigned	-
Zotu1106	d:Fungi(1.0000),p:Ascomycota(0.9500),c:Dothideomycetes(0.9500),o:Pleosporales(0.9400),f:Phaeosphaeriaceae(0.6600),g:Paraphoma(0.6000),s:Paraphoma_dioscoreae_SH208744.07FU(0.5800)	-	-	-	-	-	-	-	Unassigned	-
Zotu1107	d:Fungi(1.0000),p:Ascomycota(0.9300),c:Dothideomycetes(0.3700),o:Botryosphaeriales(0.3600),f:Dermateaceae(0.0400),g:Aplosporella(0.0300),s:Aplosporella_javeedii_SH193866.07FU(0.0300)	Aplosporella	13	Pathotroph	Plant Pathogen	NULL	NULL	Probable	NULL	b'Tedersoo L, et al. 2014. Science 346:1256688'
Zotu1108	d:Fungi(1.0000),p:Ascomycota(0.9200),c:Dothideomycetes(0.9200),o:Capnodiales(0.9200),f:Teratosphaeriaceae(0.8800),g:Catenulostroma(0.4400),s:Catenulostroma_hermanusense_SH214166.07FU(0.4400)	Catenulostroma	13	Pathotroph	Plant Pathogen	NULL	NULL	Probable	NULL	b'Tedersoo L, et al. 2014. Science 346:1256688'
Zotu1109	d:Fungi(1.0000),p:Ascomycota(1.0000),c:Dothideomycetes(0.9900),o:Diaporthales(0.0100),f:Diaporthales_fam_Incertae_sedis(0.0100),g:Diatractium(0.0100)	-	-	-	-	-	-	-	Unassigned	-
Zotu111	d:Fungi(1.0000),p:Ascomycota(0.9900),c:Eurotiomycetes(0.9900),o:Eurotiales(0.9900),f:Aspergillaceae(0.9900),g:Aspergillus(0.9900),s:Aspergillus_fumigatus_SH221298.07FU(0.8800)	Aspergillus	13	Pathotroph-Saprotroph-Symbiotroph	Endophyte-Animal Pathogen-Plant Saprotroph-Soil Saprotroph-Undefined Saprotroph-Wood Saprotroph	Microfungus	NULL	Probable	NULL	b'Seehann G, et al. 1975. List of Fungi in Soft-Rot Tissue Tests. Institute fur Holzbiologie und Holzschutz, Bundesforschungsanstalt fur Forst - und Holzwirtshaft, Hamburg - Lohbrugge, Germany; Tedersoo L, et al. 2014. Science 346:1256688; Irinyi L, et al. 2015. Medical Mycology 53:313-337; Massimo NC, et al. 2015. Microbial Ecology 70:61-76; http://www.apsnet.org/publications/commonnames/Pages/d…
Zotu1110	d:Fungi(1.0000),p:Ascomycota(1.0000),c:Sordariomycetes(1.0000),o:Xylariales(0.8700),f:Xylariaceae(0.8500),g:Anthostomella(0.6200),s:Anthostomella_sepelibilis_SH194847.07FU(0.1000)	Anthostomella	13	Saprotroph-Symbiotroph	Endophyte-Undefined Saprotroph	NULL	NULL	Probable	NULL	b'Tedersoo L, et al. 2014. Science 346:1256688'
Zotu1111	d:Fungi(1.0000),p:Basidiomycota(1.0000),c:Tremellomycetes(1.0000),o:Tremellales(0.9800),f:Bulleribasidiaceae(0.9800),g:Hannaella(0.9800),s:Hannaella_oryzae_SH219461.07FU(0.9400)	-	-	-	-	-	-	-	Unassigned	-
Zotu1112	d:Fungi(1.0000),p:Basidiomycota(1.0000),c:Microbotryomycetes(1.0000),o:Microbotryomycetes_ord_Incertae_sedis(0.9100),f:Microbotryomycetes_fam_Incertae_sedis(0.9100),g:Curvibasidium(0.9100),s:Curvibasidium_cygneicollum_SH289313.07FU(0.9100)	Curvibasidium	13	Saprotroph	Undefined Saprotroph	Microfungus	NULL	Possible	NULL	b'Sampaio JP, et al. 2004. International Journal of Systematic and Evolutionary Microbiology 54:1401-1407 (https://doi.org/10.1099/ijs.0.03037-0)'
Zotu1113	d:Fungi(1.0000),p:Ascomycota(1.0000),c:Sordariomycetes(0.9400),o:Diaporthales(0.9400),f:Diaporthaceae(0.7100),g:Diaporthe(0.7100),s:Diaporthe_convolvuli_SH495082.07FU(0.5600)	Diaporthe	13	Pathotroph-Symbiotroph	Endophyte-Plant Pathogen	Microfungus	NULL	Possible	NULL	b'Tedersoo L, et al. 2014. Science 346:1256688'
Zotu1114	d:Fungi(1.0000),p:Ascomycota(1.0000),c:Dothideomycetes(1.0000),o:Pleosporales(1.0000),f:Lophiostomataceae(0.9800),g:Lophiostoma(0.9800),s:Massarina_albocarnis_SH026434.07FU(0.0100)	Massarina	13	Pathotroph-Saprotroph	Plant Pathogen-Undefined Saprotroph	Microfungus	NULL	Probable	NULL	b'Tedersoo L, et al. 2014. Science 346:1256688'
Zotu1115	d:Fungi(1.0000),p:Ascomycota(0.9200),c:Dothideomycetes(0.9000),o:Pleosporales(0.9000),f:Phaeosphaeriaceae(0.0800),g:Phaeosphaeria(0.0200),s:Neosetophoma_samararum_SH496090.07FU(0.0200)	Neosetophoma	13	Saprotroph	Undefined Saprotroph	NULL	NULL	Probable	NULL	b'Tedersoo L, et al. 2014. Science 346:1256688'
Zotu1116	d:Fungi(1.0000),p:Basidiomycota(1.0000),c:Tremellomycetes(1.0000),o:Cystofilobasidiales(1.0000),f:Mrakiaceae(1.0000),g:Itersonilia(1.0000),s:Itersonilia_perplexans_SH199072.07FU(1.0000)	Itersonilia	13	Pathotroph	Litter Saprotroph-Plant Pathogen	Yeast-Microfungus	NULL	Probable	A dimorphic basidiomycete that has yeast and hyphal phases (McGovern et al. 2006)	b'McGovern RJ, et al. 2006. Plant Health Progress (http://doi.org/10.1094/PHP-2006-1018-02-RS); http://www.apsnet.org/publications/commonnames/Pages/default.aspx'
Zotu1117	d:Fungi(1.0000),p:Basidiomycota(1.0000),c:Agaricomycetes(1.0000),o:Corticiales(0.9100),f:Corticiaceae(0.9100)	-	-	-	-	-	-	-	Unassigned	-
Zotu1118	d:Fungi(1.0000),p:Ascomycota(0.6000),c:Dothideomycetes(0.1500),o:Lecanorales(0.0600),f:Parmeliaceae(0.0400),g:Kellermania(0.0300),s:Kellermania_anomala_SH020597.07FU(0.0200)	Kellermania	13	Pathotroph	Plant Pathogen	NULL	NULL	Probable	NULL	b'Tedersoo L, et al. 2014. Science 346:1256688'
Zotu1119	d:Fungi(1.0000),p:Basidiomycota(1.0000),c:Cystobasidiomycetes(1.0000),o:Cystobasidiomycetes_ord_Incertae_sedis(1.0000),f:Cystobasidiomycetes_fam_Incertae_sedis(1.0000),g:Buckleyzyma(1.0000),s:Buckleyzyma_aurantiaca_SH207116.07FU(1.0000)	Buckleyzyma	13	Saprotroph	Undefined Saprotroph	Yeast	NULL	Probable	NULL	b'Wang QM, et al. 2015. Studies in Mycology 81:149-189 (https://doi.org/10.1016/j.simyco.2015.12.002)'
Zotu112	d:Fungi(1.0000),p:Basidiomycota(0.5400),c:Tremellomycetes(0.5400),o:Tremellales(0.5400),f:Bulleribasidiaceae(0.5400),g:Dioszegia(0.5400),s:Dioszegia_zsoltii_var._zsoltii_SH236925.07FU(0.3000)	Dioszegia	13	Saprotroph	Undefined Saprotroph	Yeast	NULL	Probable	The Dioszegia subclade sensu Inacio (Inacio et al. 20015) is characterized by orange-yellow or orange to deep orange colonies. Isolated from plant leaves and soil.	b'Takashima M, et al. 2011 International Journal of Systematic and Evolutionary Microbiology 61:1736-1739'
Zotu1120	d:Fungi(1.0000),p:Chytridiomycota(0.8700),c:Spizellomycetes(0.7700),o:Spizellomycetales(0.7700),f:Spizellomycetaceae(0.0800),g:Spizellomyces(0.0600),s:Spizellomyces_pseudodichotomus_SH196353.07FU(0.0400)	Spizellomyces	13	Pathotroph-Saprotroph	Plant Pathogen-Undefined Parasite-Undefined Saprotroph	Microfungus	NULL	Probable	Pollen degrader; Common in the soil and also as parasites of a range of soil organisms and plants (Cannon & Kirk 2007)	b'Cannon PF, Kirk PM. 2007. Fungal Families of the World. CAB International, Cambridge; Tedersoo L, et al. 2014. Science 346:1256688'
Zotu1121	d:Fungi(1.0000),p:Chytridiomycota(0.8500),c:Spizellomycetes(0.7800),o:Spizellomycetales(0.7800),f:Powellomycetaceae(0.0200),g:Powellomyces(0.0200),s:Symbiotaphrina_buchneri_SH643910.07FU(0.0200)	Symbiotaphrina	13	Symbiotroph	Animal Endosymbiont	NULL	NULL	Probable	NULL	b'Tedersoo L, et al. 2014. Science 346:1256688'
Zotu1122	d:Fungi(1.0000),p:Basidiomycota(0.2900),c:Tremellomycetes(0.2900),o:Tremellales(0.2900),f:Bulleribasidiaceae(0.2900),g:Dioszegia(0.2900),s:Dioszegia_hungarica_SH182099.07FU(0.2900)	Dioszegia	13	Saprotroph	Undefined Saprotroph	Yeast	NULL	Probable	The Dioszegia subclade sensu Inacio (Inacio et al. 20015) is characterized by orange-yellow or orange to deep orange colonies. Isolated from plant leaves and soil.	b'Takashima M, et al. 2011 International Journal of Systematic and Evolutionary Microbiology 61:1736-1739'
Zotu1123	d:Fungi(1.0000),p:Ascomycota(1.0000),c:Dothideomycetes(0.8800),o:Pleosporales(0.8700),f:Pleosporales_fam_Incertae_sedis(0.3500),g:Paraconiothyrium(0.3100),s:Paraconiothyrium_hawaiiense_SH186963.07FU(0.0500)	Paraconiothyrium	13	Saprotroph	Undefined Saprotroph	NULL	NULL	Probable	NULL	b'Tedersoo L, et al. 2014. Science 346:1256688'
Zotu1124	d:Fungi(1.0000),p:Basidiomycota(0.9900),c:Agaricomycetes(0.9900),o:Agaricales(0.9900),f:Tricholomataceae(0.8800),g:Mycena(0.8500),s:Mycena_luteopallens_SH031984.07FU(0.8400)	Mycena	13	Pathotroph-Saprotroph	Leaf Saprotroph-Plant Pathogen-Undefined Saprotroph-Wood Saprotroph	Agaricoid	NULL	Probable	NULL	b'Grgurinovic CA, Simpson JA. 2001. Fungal Diversity 8:97-127; Tedersoo L, et al. 2014. Science 346:1256688; http://www.apsnet.org/publications/commonnames/Pages/default.aspx'
Zotu1125	d:Fungi(1.0000),p:Basidiomycota(1.0000),c:Agaricomycetes(1.0000),o:Hymenochaetales(1.0000),f:Hymenochaetales_fam_Incertae_sedis(1.0000),g:Peniophorella(1.0000),s:Peniophorella_pubera_SH185725.07FU(1.0000)	Peniophorella	13	Saprotroph	Undefined Saprotroph	Corticioid	White Rot	Probable	NULL	b'Tedersoo L, et al. 2014. Science 346:1256688'
Zotu1126	d:Fungi(1.0000),p:Ascomycota(1.0000),c:Saccharomycetes(1.0000),o:Saccharomycetales(1.0000),f:Saccharomycetales_fam_Incertae_sedis(0.4200),g:Candida(0.4200),s:Candida_intermedia_SH024156.07FU(0.4200)	Saccharomycetales	7	Saprotroph	Undefined Saprotroph	Yeast	NULL	Possible	NULL	b'Sterkenburg E, et al. 2015. New Phytologist 207:1145-1158'
Zotu1127	d:Fungi(1.0000)	-	-	-	-	-	-	-	Unassigned	-
Zotu1128	d:Fungi(1.0000),p:Basidiomycota(1.0000),c:Agaricomycetes(1.0000),o:Agaricales(1.0000),f:Entolomataceae(1.0000),g:Entoloma(1.0000),s:Entoloma_infula_SH221925.07FU(0.6100)	Entoloma	13	Pathotroph-Saprotroph-Symbiotroph	Ectomycorrhizal-Fungal Parasite-Soil Saprotroph-Undefined Saprotroph	Agaricoid	NULL	Possible	NULL	b'Rinaldi AC, et al. 2008. Fungal Diversity 33:1-45 (ECM/(not ECM); Tedersoo L, et al. 2010. Mycorrhiza 20:217-263 (sensu stricto); http://mycorrhizas.info/ecmf.html (ECM/(not ECM)'
Zotu1129	d:Fungi(1.0000),p:Ascomycota(1.0000),c:Leotiomycetes(1.0000),o:Helotiales(1.0000),f:Hyaloscyphaceae(0.1700),g:Hyaloscypha(0.1300),s:Pezoloma_ericae_SH181092.07FU(0.0200)	Pezoloma	13	Pathotroph-Saprotroph-Symbiotroph	Bryophyte Parasite-Ectomycorrhizal-Ericoid Mycorrhizal-Undefined Saprotroph-Wood Saprotroph	Microfungus; Dark Septate Microfungus	NULL	Possible	Syn.: Hymenoscyphus among other (see e.g., Pezoloma ericae)	b'Korf RP. 1999. Mycotaxon 73:493-497; Baral and Krieglsteiner 2006. Acta Mycologica 41:11-20 (as a bryophyte parasite); Huhtinen et al. 2010. Nova Hedwigia 90:413-431, Bent et al. 2011. Applied and Environmental Microbiology 77:3351-3359 (as ectomycorrhizae); Tedersoo L, et al. 2014. Science 346:1256688 (as saprotroph)'
Zotu113	d:Fungi(1.0000),p:Ascomycota(1.0000),c:Sordariomycetes(1.0000),o:Xylariales(0.2400)	-	-	-	-	-	-	-	Unassigned	-
Zotu1130	d:Fungi(1.0000),p:Basidiomycota(1.0000),c:Agaricomycetes(1.0000),o:Agaricales(1.0000),f:Psathyrellaceae(0.9700),g:Coprinopsis(0.9600),s:Coprinopsis_calospora_SH218993.07FU(0.0700)	Coprinopsis	13	Saprotroph	Undefined Saprotroph	NULL	NULL	Probable	NULL	b'Tedersoo L, et al. 2014. Science 346:1256688'
Zotu1131	d:Fungi(1.0000),p:Ascomycota(0.9300),c:Sordariomycetes(0.9300),o:Boliniales(0.1300),f:Boliniaceae(0.1000),g:Endoxyla(0.0400)	-	-	-	-	-	-	-	Unassigned	-
Zotu1132	d:Fungi(1.0000),p:Ascomycota(1.0000),c:Sordariomycetes(1.0000),o:Diaporthales(1.0000),f:Diaporthaceae(0.1100),g:Diaporthe(0.1100),s:Diaporthe_phaseolorum_SH201003.07FU(0.0700)	Diaporthe	13	Pathotroph-Symbiotroph	Endophyte-Plant Pathogen	Microfungus	NULL	Possible	NULL	b'Tedersoo L, et al. 2014. Science 346:1256688'
Zotu1133	d:Fungi(1.0000),p:Ascomycota(1.0000),c:Leotiomycetes(1.0000)	-	-	-	-	-	-	-	Unassigned	-
Zotu1134	d:Fungi(1.0000),p:Ascomycota(1.0000),c:Dothideomycetes(1.0000),o:Pleosporales(1.0000),f:Pleosporales_fam_Incertae_sedis(0.1100),g:Nigrograna(0.1100)	-	-	-	-	-	-	-	Unassigned	-
Zotu1135	d:Fungi(1.0000),p:Ascomycota(0.9900),c:Saccharomycetes(0.9900),o:Saccharomycetales(0.9900),f:Saccharomycetales_fam_Incertae_sedis(0.9900),g:Candida(0.9900),s:Candida_parapsilosis_SH197714.07FU(0.9100)	Saccharomycetales	7	Saprotroph	Undefined Saprotroph	Yeast	NULL	Possible	NULL	b'Sterkenburg E, et al. 2015. New Phytologist 207:1145-1158'
Zotu1136	d:Fungi(1.0000),p:Basidiomycota(1.0000),c:Tremellomycetes(1.0000),o:Tremellales(0.9800),f:Bulleribasidiaceae(0.9800),g:Hannaella(0.9800),s:Hannaella_oryzae_SH219461.07FU(0.9400)	-	-	-	-	-	-	-	Unassigned	-
Zotu1137	d:Fungi(1.0000),p:Ascomycota(1.0000),c:Dothideomycetes(0.9900),o:Pleosporales(0.5900),f:Lophiostomataceae(0.5500),g:Biappendiculispora(0.5100),s:Biappendiculispora_japonica_SH532144.07FU(0.5100)	Biappendiculispora	13	Saprotroph	Plant Saprotroph	Microfungus	NULL	Highly Probable	Isolated from dead herbaceous stems or culms of Poaceae (Thambugala et al. 2015)	b'Thambugala KM, et al. 2015. Fungal Diversity 74:199-266'
Zotu1138	d:Fungi(1.0000),p:Ascomycota(0.9700),c:Dothideomycetes(0.8800),o:Venturiales(0.8400),f:Sympoventuriaceae(0.3300),g:Fusicladium(0.2700),s:Fusicladium_africanum_SH215112.07FU(0.1800)	Fusicladium	13	Pathotroph	Plant Pathogen	NULL	NULL	Probable	NULL	b'Tedersoo L, et al. 2014. Science 346:1256688'
Zotu1139	d:Fungi(1.0000),p:Basidiomycota(0.2800),c:Tremellomycetes(0.2800),o:Tremellales(0.2800),f:Bulleribasidiaceae(0.2800),g:Dioszegia(0.2800),s:Dioszegia_takashimae_SH182102.07FU(0.1200)	Dioszegia	13	Saprotroph	Undefined Saprotroph	Yeast	NULL	Probable	The Dioszegia subclade sensu Inacio (Inacio et al. 20015) is characterized by orange-yellow or orange to deep orange colonies. Isolated from plant leaves and soil.	b'Takashima M, et al. 2011 International Journal of Systematic and Evolutionary Microbiology 61:1736-1739'
Zotu114	d:Fungi(1.0000),p:Ascomycota(1.0000),c:Sordariomycetes(1.0000),o:Xylariales(1.0000),f:Xylariaceae(1.0000),g:Hypoxylon(0.9700),s:Hypoxylon_carneum_SH196275.07FU(0.7800)	Hypoxylon	13	Saprotroph	Undefined Saprotroph	NULL	NULL	Probable	NULL	b'Tedersoo L, et al. 2014. Science 346:1256688'
Zotu1140	d:Fungi(1.0000),p:Basidiomycota(1.0000),c:Agaricomycetes(1.0000),o:Agaricales(1.0000),f:Pluteaceae(1.0000),g:Pluteus(1.0000),s:Pluteus_albostipitatus_SH185149.07FU(0.6700)	Pluteus	13	Pathotroph-Saprotroph	Bryophyte Parasite-Litter Saprotroph-Wood Saprotroph	Agaricoid	White Rot	Probable	NULL	b'Grgurinovic CA, Simpson JA. 2001. Fungal Diversity 8:97-127; James TY, et al. 2006. Nature 443:818-822; Tedersoo L, et al. 2014. Science 346:1256688'
Zotu1141	d:Fungi(1.0000),p:Ascomycota(1.0000),c:Dothideomycetes(1.0000),o:Myriangiales(1.0000),f:Elsinoaceae(1.0000),g:Sphaceloma(0.0400),s:Sphaceloma_erythrinae_SH194114.07FU(0.0300)	Sphaceloma	13	Pathotroph	Plant Pathogen	NULL	NULL	Probable	NULL	b'Tedersoo L, et al. 2014. Science 346:1256688'
Zotu1142	d:Fungi(1.0000),p:Ascomycota(1.0000),c:Dothideomycetes(0.9800),o:Pleosporales(0.9700),f:Lentitheciaceae(0.8300),g:Keissleriella(0.8300),s:Keissleriella_culmifida_SH207044.07FU(0.7100)	Keissleriella	13	Saprotroph	Undefined Saprotroph	NULL	NULL	Probable	NULL	b'Tedersoo L, et al. 2014. Science 346:1256688'
Zotu1143	d:Fungi(1.0000),p:Ascomycota(1.0000),c:Sordariomycetes(1.0000),o:Trichosphaeriales(0.9900),f:Trichosphaeriaceae(0.9900),g:Nigrospora(0.9900),s:Nigrospora_oryzae_SH177637.07FU(0.9700)	Nigrospora	13	Saprotroph	Undefined Saprotroph	NULL	NULL	Probable	NULL	b'Tedersoo L, et al. 2014. Science 346:1256688'
Zotu1144	d:Fungi(1.0000),p:Ascomycota(1.0000),c:Eurotiomycetes(1.0000),o:Chaetothyriales(1.0000),f:Herpotrichiellaceae(1.0000),g:Phialophora(1.0000),s:Phialophora_livistonae_SH213231.07FU(1.0000)	Phialophora	13	Pathotroph-Saprotroph-Symbiotroph	Animal Pathogen-Endophyte-Ericoid Mycorrhizal-Plant Pathogen-Wood Saprotroph	Facultative Yeast-Microfungus	NULL	Possible	Consult the current literature for updated names on this paraphyletic grouping that included the Black Yeasts, Dark Septate Endophytes, etc.	b'Nilsson T. 1973. Studies on wood degradation and cellulolytic activity of microfungi. No. 104; de Hoog GS, et al. 2000. Mycoses 43:409-416; Rinaldi AC, et al. 2008. Fungal Diversity 33:1-45; Newsham 2011. New Phytologist 190:783-793 (as DSE); Irinyi L, et al. 2015. Medical Mycology 53:313-337; http://www.apsnet.org/publications/commonnames/Pages/default.aspx'
Zotu1145	d:Fungi(1.0000),p:Ascomycota(1.0000),c:Dothideomycetes(1.0000),o:Pleosporales(1.0000),f:Massarinaceae(0.9700),g:Helminthosporium(0.9700),s:Helminthosporium_velutinum_SH194135.07FU(0.9200)	Helminthosporium	13	Pathotroph	Fungal Parasite-Plant Pathogen	NULL	NULL	Probable	NULL	b'Tedersoo L, et al. 2014. Science 346:1256688; Samuels GJ. 2007, self-published.'
Zotu1146	d:Fungi(1.0000),p:Ascomycota(0.7400),c:Leotiomycetes(0.2400),o:Helotiales(0.2000),f:Leotiaceae(0.0900),g:Neobulgaria(0.0600),s:Furcaspora_eucalypti_SH466226.07FU(0.0500)	-	-	-	-	-	-	-	Unassigned	-
Zotu1147	d:Fungi(1.0000),p:Basidiomycota(1.0000),c:Malasseziomycetes(1.0000),o:Malasseziales(1.0000),f:Malasseziaceae(1.0000),g:Malassezia(1.0000),s:Malassezia_globosa_SH184036.07FU(0.5100)	Malassezia	13	Pathotroph-Saprotroph	Animal Pathogen-Undefined Saprotroph	Facultative Yeast	NULL	Probable	A lipid-dependent fungus growing on the sebaceous areas of human skin that may cause or exacerbate several skin diseases (Pityrosporum is a synonym that has been used for the yeast forms)	b'Findley K, et al. 2013. Nature 498:367-370'
Zotu1148	d:Fungi(1.0000),p:Ascomycota(0.7800),c:Dothideomycetes(0.1900),o:Capnodiales(0.1900),f:Mycosphaerellaceae(0.0400),g:Ramularia(0.0400),s:Symbiotaphrina_kochii_SH021199.07FU(0.0100)	Symbiotaphrina	13	Symbiotroph	Animal Endosymbiont	NULL	NULL	Probable	NULL	b'Tedersoo L, et al. 2014. Science 346:1256688'
Zotu1149	d:Fungi(1.0000),p:Ascomycota(0.9600),c:Dothideomycetes(0.8700),o:Dothideomycetes_ord_Incertae_sedis(0.7500),f:Dothideomycetes_fam_Incertae_sedis(0.7500),g:Peltaster(0.7500),s:Peltaster_fructicola_SH204639.07FU(0.7200)	Peltaster	13	Pathotroph	Plant Pathogen	NULL	NULL	Probable	NULL	b'http://www.apsnet.org/publications/commonnames/Pages/default.aspx'
Zotu115	d:Fungi(1.0000),p:Basidiomycota(1.0000),c:Pucciniomycetes(1.0000),o:Pucciniales(1.0000),f:Cronartiaceae(0.9600),g:Cronartium(0.6200),s:Cronartium_ribicola_SH176007.07FU(0.2200)	Cronartium	13	Pathotroph	Plant Pathogen	Microfungus	NULL	Highly Probable	Common Name - Blister Rust, Rust Fungus	b'Tedersoo L, et al. 2014. Science 346:1256688'
Zotu1150	d:Fungi(1.0000),p:Basidiomycota(0.7100),c:Cystobasidiomycetes(0.7100),o:Erythrobasidiales(0.7100),f:Erythrobasidiaceae(0.7100),g:Erythrobasidium(0.7100)	-	-	-	-	-	-	-	Unassigned	-
Zotu1151	d:Fungi(1.0000),p:Ascomycota(1.0000),c:Leotiomycetes(1.0000),o:Helotiales(1.0000),f:Hyaloscyphaceae(0.9900),g:Lachnum(0.5600),s:Lachnum_virgineum_SH201666.07FU(0.0200)	Lachnum	13	Saprotroph	Undefined Saprotroph	Microfungus	NULL	Probable	NULL	b'Tedersoo L, et al. 2014. Science 346:1256688'
Zotu1152	d:Fungi(1.0000),p:Basidiomycota(1.0000),c:Agaricomycetes(1.0000),o:Auriculariales(1.0000),f:Aporpiaceae(0.9500),g:Elmerina(0.9500),s:Elmerina_dimidiata_SH200343.07FU(0.9300)	Elmerina	13	Saprotroph	Undefined Saprotroph	NULL	NULL	Probable	NULL	b'Tedersoo L, et al. 2014. Science 346:1256688'
Zotu1153	d:Fungi(1.0000),p:Ascomycota(1.0000),c:Sordariomycetes(1.0000),o:Diaporthales(1.0000),f:Gnomoniaceae(0.9300),g:Gnomoniopsis(0.6500),s:Alnecium_auctum_SH497067.07FU(0.0200)	Alnecium	13	Saprotroph	Plant Saprotroph	Microfungus	NULL	Highly Probable	On branches of Alnus glutinosa (Voglmayr & Jaklitsch 2014)	b'Voglmayr H, Jaklitsch W. 2014. Persoonia 33:61-82'
Zotu1154	d:Fungi(1.0000),p:Ascomycota(0.9800),c:Sordariomycetes(0.9800),o:Xylariales(0.9700),f:Xylariaceae(0.9700),g:Biscogniauxia(0.8200),s:Biscogniauxia_atropunctata_SH221799.07FU(0.8100)	Biscogniauxia	13	Saprotroph	Undefined Saprotroph	NULL	NULL	Probable	NULL	b'Tedersoo L, et al. 2014. Science 346:1256688'
Zotu1155	d:Fungi(1.0000),p:Basidiomycota(1.0000),c:Agaricomycetes(1.0000),o:Russulales(1.0000),f:Russulaceae(1.0000),g:Russula(1.0000)	-	-	-	-	-	-	-	Unassigned	-
Zotu1156	d:Fungi(1.0000),p:Ascomycota(0.7600),c:Dothideomycetes(0.5000),o:Pleosporales(0.0100),f:Teloschistaceae(0.0100),g:Cladonia(0.0100),s:Diplodia_corticola_SH496519.07FU(0.0100)	Diplodia	13	Pathotroph-Saprotroph-Symbiotroph	Epiphyte-Plant Pathogen-Wood Saprotroph	Microfungus	NULL	Possible	Cause of soft-rot; Epiphyte detection method-culture (Carisse et al. 2000)	b'Duncan CG, Eslyn WE. 1966. Mycologia 58:642-645; Carisse O, et al. 2000. Biological Control 90:31-37'
Zotu1157	d:Fungi(1.0000),p:Ascomycota(1.0000),c:Sordariomycetes(1.0000),o:Xylariales(1.0000),f:Sporocadaceae(1.0000),g:Pestalotiopsis(1.0000),s:Pestalotiopsis_australis_SH388740.07FU(0.0500)	Pestalotiopsis	13	Pathotroph	Plant Pathogen	NULL	NULL	Probable	NULL	b'Tedersoo L, et al. 2014. Science 346:1256688'
Zotu1158	d:Fungi(1.0000),p:Ascomycota(0.9800),c:Sordariomycetes(0.9200),o:Hypocreales(0.2900),f:Hypocreales_fam_Incertae_sedis(0.2200),g:Acremonium(0.0400),s:Acremonium_stromaticum_SH219561.07FU(0.0300)	Acremonium	13	Pathogen-Saprotroph-Symbiotroph	Animal Pathogen-Endophyte-Fungal Parasite-Plant Pathogen-Wood Saprotroph	Microfungus	Soft Rot	Possible	Endophyte detection method-culture (Hanada et al. 2010, Del Olmo-Ruiz & Arnold 2014); Likely opportunistic human pathogen (Irinyi et al. 2015)	b'Duncan CG, Eslyn WE. 1966. Mycologia 58:642-64; Nilsson T. 1973. Studies on wood degradation and cellulolytic activity of microfungi. No. 104; Worrall JJ, et al. 1997. Mycologia 89: 199-219; Hanada RE, et al. 2010. Fungal Biology 114:901-910; Del Olmo-Ruiz M, Arnold AE. 2014. Mycologia 106:8-21; Tedersoo L, et al. 2014. Science 346:1256688; Irinyi L, et al. 2015. Medical Mycology 53:313-337'
Zotu1159	d:Fungi(1.0000),p:Ascomycota(0.9200),c:Dothideomycetes(0.6900),o:Myriangiales(0.6100),f:Myriangiales_fam_Incertae_sedis(0.1900),g:Endosporium(0.1900),s:Cladonia_delavayi_SH189815.07FU(0.0100)	Cladonia	13	Symbiotroph	Lichenized	Thallus	NULL	Highly Probable	NULL	b'James TY, et al. 2006. Nature 443:818-822'
Zotu116	d:Fungi(1.0000),p:Ascomycota(1.0000),c:Leotiomycetes(1.0000),o:Erysiphales(1.0000),f:Erysiphaceae(1.0000),g:Erysiphe(1.0000),s:Erysiphe_platani_SH187447.07FU(0.9000)	Erysiphe	13	Pathotroph	Plant Pathogen	Microfungus	NULL	Probable	NULL	b'Tedersoo L, et al. 2014. Science 346:1256688'
Zotu1160	d:Fungi(1.0000),p:Ascomycota(1.0000),c:Dothideomycetes(1.0000),o:Myriangiales(1.0000),f:Elsinoaceae(1.0000)	-	-	-	-	-	-	-	Unassigned	-
Zotu1161	d:Fungi(1.0000),p:Ascomycota(1.0000),c:Leotiomycetes(1.0000),o:Helotiales(1.0000),f:Hyaloscyphaceae(0.9900),g:Lachnum(0.5600),s:Lachnum_virgineum_SH201666.07FU(0.0200)	Lachnum	13	Saprotroph	Undefined Saprotroph	Microfungus	NULL	Probable	NULL	b'Tedersoo L, et al. 2014. Science 346:1256688'
Zotu1162	d:Fungi(1.0000),p:Ascomycota(0.9500),c:Sordariomycetes(0.4700),o:Helotiales(0.2100),f:Nectriaceae(0.0800),g:Thyronectria(0.0800),s:Xerombrophila_crystallifera_SH192301.07FU(0.0600)	Xerombrophila	13	Saprotroph	Undefined Saprotroph	NULL	NULL	Probable	NULL	b'Tedersoo L, et al. 2014. Science 346:1256688'
Zotu1163	d:Fungi(1.0000),p:Ascomycota(1.0000),c:Sordariomycetes(1.0000),o:Diaporthales(1.0000),f:Gnomoniaceae(0.9700),g:Cryptodiaporthe(0.4100),s:Alnecium_auctum_SH497067.07FU(0.1100)	Alnecium	13	Saprotroph	Plant Saprotroph	Microfungus	NULL	Highly Probable	On branches of Alnus glutinosa (Voglmayr & Jaklitsch 2014)	b'Voglmayr H, Jaklitsch W. 2014. Persoonia 33:61-82'
Zotu1164	d:Fungi(1.0000),p:Basidiomycota(0.9800),c:Wallemiomycetes(0.9800),o:Wallemiales(0.9800),f:Wallemiales_fam_Incertae_sedis(0.9800),g:Wallemia(0.9800),s:Wallemia_muriae_SH216459.07FU(0.5100)	Wallemia	13	Saprotroph	Undefined Saprotroph	NULL	NULL	Probable	NULL	b'Tedersoo L, et al. 2014. Science 346:1256688 (doi:10.1126/science.1256688)'
Zotu1165	d:Fungi(1.0000),p:Ascomycota(1.0000),c:Sordariomycetes(1.0000),o:Xylariales(1.0000)	-	-	-	-	-	-	-	Unassigned	-
Zotu1166	d:Fungi(1.0000),p:Basidiomycota(1.0000),c:Agaricomycetes(1.0000),o:Agaricales(1.0000),f:Psathyrellaceae(1.0000),g:Coprinellus(0.8900),s:Coprinellus_plagioporus_SH220376.07FU(0.3400)	Coprinellus	13	Saprotroph	Undefined Saprotroph	NULL	NULL	Probable	NULL	b'Tedersoo L, et al. 2014. Science 346:1256688'
Zotu1167	d:Fungi(1.0000),p:Ascomycota(0.2600),c:Xylonomycetes(0.0400),o:Xylonomycetales(0.0400),f:Xylonomycetales_fam_Incertae_sedis(0.0400),g:Symbiotaphrina(0.0400),s:Symbiotaphrina_buchneri_SH643910.07FU(0.0300)	Symbiotaphrina	13	Symbiotroph	Animal Endosymbiont	NULL	NULL	Probable	NULL	b'Tedersoo L, et al. 2014. Science 346:1256688'
Zotu1168	d:Fungi(1.0000),p:Ascomycota(1.0000),c:Sordariomycetes(1.0000),o:Magnaporthales(1.0000),f:Magnaporthaceae(1.0000),g:Pyricularia(1.0000)	-	-	-	-	-	-	-	Unassigned	-
Zotu1169	d:Fungi(1.0000),p:Basidiomycota(1.0000),c:Wallemiomycetes(1.0000),o:Wallemiales(1.0000),f:Wallemiales_fam_Incertae_sedis(1.0000),g:Wallemia(1.0000),s:Wallemia_muriae_SH216459.07FU(0.6400)	Wallemia	13	Saprotroph	Undefined Saprotroph	NULL	NULL	Probable	NULL	b'Tedersoo L, et al. 2014. Science 346:1256688 (doi:10.1126/science.1256688)'
Zotu117	d:Fungi(1.0000),p:Basidiomycota(1.0000),c:Malasseziomycetes(1.0000),o:Malasseziales(1.0000)	-	-	-	-	-	-	-	Unassigned	-
Zotu1170	d:Fungi(1.0000),p:Basidiomycota(1.0000),c:Agaricomycetes(1.0000),o:Auriculariales(1.0000)	-	-	-	-	-	-	-	Unassigned	-
Zotu1171	d:Fungi(1.0000),p:Ascomycota(0.9500),c:Dothideomycetes(0.8800),o:Pleosporales(0.8800),f:Phaeosphaeriaceae(0.2500),g:Phaeosphaeria(0.1500),s:Phaeosphaeria_spartinae_SH212722.07FU(0.1500)	Phaeosphaeria	13	Saprotroph	Undefined Saprotroph	NULL	NULL	Probable	NULL	b'Tedersoo L, et al. 2014. Science 346:1256688'
Zotu1172	d:Fungi(1.0000),p:Ascomycota(1.0000),c:Dothideomycetes(1.0000),o:Botryosphaeriales(1.0000),f:Botryosphaeriaceae(1.0000),g:Diplodia(0.9800),s:Diplodia_scrobiculata_SH419905.07FU(0.5400)	Diplodia	13	Pathotroph-Saprotroph-Symbiotroph	Epiphyte-Plant Pathogen-Wood Saprotroph	Microfungus	NULL	Possible	Cause of soft-rot; Epiphyte detection method-culture (Carisse et al. 2000)	b'Duncan CG, Eslyn WE. 1966. Mycologia 58:642-645; Carisse O, et al. 2000. Biological Control 90:31-37'
Zotu1173	d:Fungi(1.0000),p:Ascomycota(0.3800),c:Sordariomycetes(0.2200),o:Microascales(0.2200),f:Halosphaeriaceae(0.2000),g:Paramicrothyrium(0.0800)	-	-	-	-	-	-	-	Unassigned	-
Zotu1174	d:Fungi(0.8400),p:Ascomycota(0.7300),c:Dothideomycetes(0.6200),o:Pleosporales(0.5200),f:Sporormiaceae(0.2700),g:Preussia(0.2500),s:Sarimanas_shirakamiense_SH533960.07FU(0.0500)	-	-	-	-	-	-	-	Unassigned	-
Zotu1175	d:Fungi(1.0000),p:Basidiomycota(1.0000),c:Agaricomycetes(1.0000),o:Polyporales(0.9800),f:Schizoporaceae(0.9800),g:Xylodon(0.9800),s:Xylodon_sambuci_SH185877.07FU(0.9800)	Xylodon	13	Saprotroph	Undefined Saprotroph	Corticioid	White Rot	Probable	NULL	b'Tedersoo L, et al. 2014. Science 346:1256688'
Zotu1176	d:Fungi(1.0000),p:Ascomycota(1.0000),c:Eurotiomycetes(1.0000),o:Chaetothyriales(1.0000),f:Herpotrichiellaceae(0.8200),g:Cyphellophora(0.0100)	-	-	-	-	-	-	-	Unassigned	-
Zotu1177	d:Fungi(1.0000),p:Basidiomycota(1.0000),c:Agaricomycetes(1.0000),o:Russulales(1.0000),f:Russulaceae(1.0000),g:Russula(1.0000),s:Russula_pulchra_SH219916.07FU(0.9300)	Russula	13	Symbiotroph	Ectomycorrhizal	Agaricoid	NULL	Highly Probable	NULL	b'Rinaldi AC, et al. 2008. Fungal Diversity 33:1-45; Tedersoo L, et al. 2010. Mycorrhiza 20:217-263; http://mycorrhizas.info/ecmf.html'
Zotu1178	d:Fungi(1.0000),p:Basidiomycota(1.0000),c:Agaricomycetes(1.0000),o:Cantharellales(1.0000),f:Ceratobasidiaceae(0.9900),g:Ceratobasidium(0.4600),s:Thanatephorus_cucumeris_SH218657.07FU(0.0100)	Thanatephorus	13	Pathotroph	Plant Pathogen	NULL	NULL	Probable	NULL	b'Tedersoo L, et al. 2014. Science 346:1256688'
Zotu1179	d:Fungi(1.0000),p:Basidiomycota(0.9700),c:Agaricomycetes(0.9700),o:Russulales(0.8300),f:Peniophoraceae(0.3100),g:Peniophora(0.2100),s:Peniophora_aurantiaca_SH188974.07FU(0.1700)	Peniophora	13	Pathotroph-Saprotroph	Plant Pathogen-Wood Saprotroph	Corticioid	White Rot	Probable	NULL	b'Tedersoo L, et al. 2014. Science 346:1256688'
Zotu118	d:Fungi(1.0000),p:Ascomycota(1.0000),c:Dothideomycetes(1.0000),o:Pleosporales(1.0000),f:Didymellaceae(0.5800),g:Didymella(0.3700),s:Stagonosporopsis_dennisii_SH245147.07FU(0.1500)	Stagonosporopsis	13	Pathotroph	Plant Pathogen	NULL	NULL	Probable	NULL	b'http://www.apsnet.org/publications/commonnames/Pages/default.aspx'
Zotu1180	d:Fungi(1.0000),p:Ascomycota(1.0000)	-	-	-	-	-	-	-	Unassigned	-
Zotu1181	d:Fungi(1.0000),p:Basidiomycota(1.0000),c:Agaricomycetes(1.0000),o:Polyporales(1.0000),f:Polyporaceae(1.0000),g:Yuchengia(0.9700),s:Yuchengia_narymica_SH179663.07FU(0.9200)	Yuchengia	13	Saprotroph	Undefined Saprotroph	NULL	White Rot	Probable	NULL	b'Tedersoo L, et al. 2014. Science 346:1256688'
Zotu1182	d:Fungi(1.0000),p:Ascomycota(0.9400),c:Dothideomycetes(0.7700),o:Capnodiales(0.5300),f:Teratosphaeriaceae(0.2300),g:Teratosphaeria(0.1300),s:Stenella_araguata_SH200604.07FU(0.0700)	Stenella	13	Saprotroph	Undefined Saprotroph	NULL	NULL	Probable	NULL	b'Tedersoo L, et al. 2014. Science 346:1256688'
Zotu1183	d:Fungi(1.0000),p:Ascomycota(1.0000),c:Leotiomycetes(1.0000),o:Helotiales(1.0000),f:Hyaloscyphaceae(0.9900),g:Lachnum(0.5200),s:Lachnum_virgineum_SH201666.07FU(0.0200)	Lachnum	13	Saprotroph	Undefined Saprotroph	Microfungus	NULL	Probable	NULL	b'Tedersoo L, et al. 2014. Science 346:1256688'
Zotu1184	d:Fungi(1.0000),p:Ascomycota(1.0000),c:Dothideomycetes(0.7400),o:Capnodiales(0.0300),f:Mycosphaerellaceae(0.0300),g:Ramularia(0.0300),s:Ramularia_armoraciae_SH206862.07FU(0.0200)	Ramularia	13	Pathotroph	Plant Pathogen	Microfungus	NULL	Probable	NULL	b'Tedersoo L, et al. 2014. Science 346:1256688'
Zotu1185	d:Fungi(1.0000),p:Ascomycota(1.0000),c:Dothideomycetes(1.0000),o:Botryosphaeriales(1.0000),f:Botryosphaeriaceae(1.0000),g:Diplodia(0.2400),s:Barriopsis_fusca_SH211968.07FU(0.2400)	Barriopsis	13	Pathotroph	Plant Pathogen	NULL	NULL	Probable	NULL	b'Tedersoo L, et al. 2014. Science 346:1256688'
Zotu1186	d:Fungi(1.0000),p:Ascomycota(0.4300),c:Arthoniomycetes(0.1800),o:Chaetothyriales(0.0600),f:Helotiaceae(0.0300),g:Rinodina(0.0200),s:Rinodina_mniaroeiza_SH629583.07FU(0.0200)	Rinodina	13	Symbiotroph	Lichenized	Thallus	NULL	Highly Probable	NULL	b'Esslinger TL. 2014. North Dakota State University (http://www.ndsu.edu/pubweb/~esslinge/chcklst/chcklst7.htm)'
Zotu1187	d:Fungi(1.0000),p:Basidiomycota(1.0000),c:Malasseziomycetes(1.0000),o:Malasseziales(1.0000),f:Malasseziaceae(1.0000),g:Malassezia(1.0000),s:Malassezia_globosa_SH184032.07FU(0.3600)	Malassezia	13	Pathotroph-Saprotroph	Animal Pathogen-Undefined Saprotroph	Facultative Yeast	NULL	Probable	A lipid-dependent fungus growing on the sebaceous areas of human skin that may cause or exacerbate several skin diseases (Pityrosporum is a synonym that has been used for the yeast forms)	b'Findley K, et al. 2013. Nature 498:367-370'
Zotu1188	d:Fungi(1.0000),p:Ascomycota(1.0000),c:Sordariomycetes(1.0000),o:Xylariales(1.0000)	-	-	-	-	-	-	-	Unassigned	-
Zotu1189	d:Fungi(1.0000)	-	-	-	-	-	-	-	Unassigned	-
Zotu119	d:Fungi(1.0000),p:Ascomycota(1.0000),c:Dothideomycetes(1.0000),o:Tubeufiales(0.9000),f:Tubeufiaceae(0.9000),g:Helicoma(0.2900),s:Helicoma_vaccinii_SH018862.07FU(0.2900)	Helicoma	13	Saprotroph	Undefined Saprotroph	NULL	NULL	Probable	NULL	b'Tedersoo L, et al. 2014. Science 346:1256688'
Zotu1190	d:Fungi(1.0000),p:Basidiomycota(1.0000),c:Agaricomycetes(1.0000),o:Geastrales(1.0000),f:Geastraceae(1.0000),g:Geastrum(1.0000),s:Geastrum_saccatum_SH025437.07FU(1.0000)	Geastrum	13	Saprotroph	Undefined Saprotroph	Gasteroid	NULL	Probable	Common name - earthstar; Terrestrial, rarely on wood or coprophilous. Most species are presumed saprobes, but at least some may be ectomycorrhizal (Cannon & Kirk 2007)	b'Grgurinovic CA, Simpson JA. 2001. Fungal Diversity 8:97-127; Cannon PF, Kirk PM. 2007. Fungal Families of the World. CAB International, Cambridge; Tedersoo L, et al. 2014. Science 346:1256688 (doi:10.1126/science.1256688)'
Zotu1191	d:Fungi(1.0000),p:Ascomycota(1.0000),c:Sordariomycetes(0.8000),o:Diaporthales(0.8000),f:Diaporthaceae(0.5700),g:Diaporthe(0.5700),s:Diaporthe_phaseolorum_SH491615.07FU(0.3500)	Diaporthe	13	Pathotroph-Symbiotroph	Endophyte-Plant Pathogen	Microfungus	NULL	Possible	NULL	b'Tedersoo L, et al. 2014. Science 346:1256688'
Zotu1192	d:Fungi(1.0000),p:Ascomycota(0.2500),c:Sordariomycetes(0.0400),o:Microascales(0.0400),f:Dothideomycetes_fam_Incertae_sedis(0.0400),g:Paramicrothyrium(0.0400)	-	-	-	-	-	-	-	Unassigned	-
Zotu1193	d:Fungi(1.0000),p:Basidiomycota(1.0000),c:Microbotryomycetes(1.0000),o:Sporidiobolales(1.0000),f:Sporidiobolaceae(1.0000),g:Rhodotorula(1.0000),s:Rhodotorula_glutinis_SH491450.07FU(0.7200)	Rhodotorula	13	Pathotroph-Saprotroph	Animal Endosymbiont-Animal Pathogen-Endophyte-Plant Pathogen-Undefined Saprotroph	Yeast	NULL	Probable	Opportunistic human pathogen	b'http://www.cdc.gov'
Zotu1194	d:Fungi(1.0000),p:Ascomycota(0.4500),c:Dothideomycetes(0.4400),o:Pleosporales(0.4400),f:Pleosporaceae(0.4400),g:Alternaria(0.2200),s:Alternaria_eichhorniae_SH215493.07FU(0.1100)	Alternaria	13	Pathotroph-Saprotroph-Symbiotroph	Animal Pathogen-Endophyte-Plant Pathogen-Wood Saprotroph	Microfungus	Soft Rot	Possible	NULL	b'Duncan CG, Eslyn WE. 1966. Mycologia 58:642-664; Seehann G, et al. 1975. List of Fungi in Soft-Rot Tissue Tests. Institute fur Holzbiologie und Holzschutz, Bundesforschungsanstalt fur Forst - und Holzwirtshaft, Hamburg - Lohbrugge, Germany; Tedersoo L, et al. 2014. Science 346:125688'
Zotu1195	d:Fungi(1.0000),p:Ascomycota(1.0000),c:Sordariomycetes(1.0000),o:Diaporthales(1.0000),f:Diaporthaceae(0.6800),g:Diaporthe(0.6500),s:Diaporthe_brasiliensis_SH090641.07FU(0.2200)	Diaporthe	13	Pathotroph-Symbiotroph	Endophyte-Plant Pathogen	Microfungus	NULL	Possible	NULL	b'Tedersoo L, et al. 2014. Science 346:1256688'
Zotu1196	d:Fungi(1.0000),p:Ascomycota(1.0000),c:Sordariomycetes(1.0000),o:Glomerellales(1.0000),f:Glomerellaceae(1.0000),g:Colletotrichum(0.9400),s:Colletotrichum_lupini_SH408620.07FU(0.1300)	Colletotrichum	13	Pathotroph-Symbiotroph	Endophyte-Plant Pathogen	Microfungus	NULL	Probable	NULL	b'Costa IPMW, et al. 2012. Mycotaxon 119:26; Tedersoo L, et al. 2014. Science 346:1256688; http://www.apsnet.org/publications/commonnames/Pages/default.aspx'
Zotu1197	d:Fungi(1.0000),p:Ascomycota(0.9200),c:Leotiomycetes(0.3200),o:Helotiales(0.2400),f:Acarosporaceae(0.2400),g:Polysporina(0.2100),s:Polysporina_cyclocarpa_SH529251.07FU(0.1300)	Polysporina	13	Symbiotroph	Lichenized	Thallus	NULL	Possible	Lichenized and non-licenized taxa	b'Esslinger TL. 2014. North Dakota State University (http://www.ndsu.edu/pubweb/~esslinge/chcklst/chcklst7.htm)'
Zotu1198	d:Fungi(1.0000),p:Ascomycota(1.0000),c:Eurotiomycetes(1.0000),o:Chaetothyriales(1.0000),f:Chaetothyriales_fam_Incertae_sedis(1.0000),g:Strelitziana(1.0000),s:Strelitziana_albiziae_SH193004.07FU(1.0000)	Strelitziana	13	Pathotroph	Plant Pathogen	NULL	NULL	Probable	NULL	b'Tedersoo L, et al. 2014. Science 346:1256688'
Zotu1199	d:Fungi(1.0000),p:Ascomycota(1.0000),c:Dothideomycetes(0.9700),o:Pleosporales(0.9700),f:Phaeosphaeriaceae(0.0100),g:Leptosphaeria(0.0100)	-	-	-	-	-	-	-	Unassigned	-
Zotu12	d:Fungi(1.0000),p:Basidiomycota(0.9300),c:Malasseziomycetes(0.9300),o:Malasseziales(0.9300),f:Malasseziaceae(0.9300),g:Malassezia(0.9300),s:Malassezia_restricta_SH176394.07FU(0.9300)	Malassezia	13	Pathotroph-Saprotroph	Animal Pathogen-Undefined Saprotroph	Facultative Yeast	NULL	Probable	A lipid-dependent fungus growing on the sebaceous areas of human skin that may cause or exacerbate several skin diseases (Pityrosporum is a synonym that has been used for the yeast forms)	b'Findley K, et al. 2013. Nature 498:367-370'
Zotu120	d:Fungi(1.0000),p:Basidiomycota(0.4900),c:Microbotryomycetes(0.4900),o:Sporidiobolales(0.4900),f:Sporidiobolaceae(0.4900),g:Sporobolomyces(0.4500),s:Sporobolomyces_ruberrimus_SH194976.07FU(0.3000)	Sporobolomyces	13	Pathotroph-Saprotroph	Fungal Parasite-Litter Saprotroph	Yeast	NULL	Probable	NULL	b'Tedersoo L, et al. 2014. Science 346:1256688; Nagy GL, et al. 2014. Nature Communications 5:4471; Purahong W, et al. 2016. Molecular Ecology 25:4059-4074'
Zotu1200	d:Fungi(1.0000),p:Ascomycota(1.0000),c:Eurotiomycetes(0.9800),o:Eurotiales(0.9800),f:Aspergillaceae(0.9800),g:Aspergillus(0.9800),s:Aspergillus_penicillioides_SH198032.07FU(0.9800)	Aspergillus	13	Pathotroph-Saprotroph-Symbiotroph	Endophyte-Animal Pathogen-Plant Saprotroph-Soil Saprotroph-Undefined Saprotroph-Wood Saprotroph	Microfungus	NULL	Probable	NULL	b'Seehann G, et al. 1975. List of Fungi in Soft-Rot Tissue Tests. Institute fur Holzbiologie und Holzschutz, Bundesforschungsanstalt fur Forst - und Holzwirtshaft, Hamburg - Lohbrugge, Germany; Tedersoo L, et al. 2014. Science 346:1256688; Irinyi L, et al. 2015. Medical Mycology 53:313-337; Massimo NC, et al. 2015. Microbial Ecology 70:61-76; http://www.apsnet.org/publications/commonnames/Pages/d…
Zotu1201	d:Fungi(1.0000),p:Ascomycota(0.9900),c:Sordariomycetes(0.9900),o:Xylariales(0.9900),f:Xylariaceae(0.9300),g:Hypoxylon(0.8000),s:Hypoxylon_erythrostroma_SH212715.07FU(0.3900)	Hypoxylon	13	Saprotroph	Undefined Saprotroph	NULL	NULL	Probable	NULL	b'Tedersoo L, et al. 2014. Science 346:1256688'
Zotu1202	d:Fungi(1.0000),p:Basidiomycota(1.0000),c:Agaricomycetes(1.0000),o:Sebacinales(0.8700),f:Sebacinaceae(0.4700),g:Chaetospermum(0.2100),s:Chaetospermum_chaetosporum_SH206084.07FU(0.2100)	Chaetospermum	13	Saprotroph	Undefined Saprotroph	Microfungus	NULL	Probable	NULL	b'Tangthirasunun N, et al. 2014. Phytotaxa 175:061-072 (http://doi.org/10.11646/phytotaxa.175.2.1)'
Zotu1203	d:Fungi(1.0000),p:Basidiomycota(0.9600),c:Microbotryomycetes(0.7100),o:Sporidiobolales(0.7100),f:Sporidiobolaceae(0.7100),g:Sporobolomyces(0.7100),s:Naohidea_sebacea_SH473058.07FU(0.1500)	-	-	-	-	-	-	-	Unassigned	-
Zotu1204	d:Fungi(1.0000),p:Ascomycota(0.9900),c:Sordariomycetes(0.9100),o:Diaporthales(0.9100),f:Diaporthaceae(0.8000),g:Diaporthe(0.8000),s:Lasiodiplodia_theobromae_SH522767.07FU(0.0800)	Lasiodiplodia	13	Pathotroph	Plant Pathogen	NULL	NULL	Probable	NULL	b'Tedersoo L, et al. 2014. Science 346:1256688'
Zotu1205	d:Fungi(1.0000),p:Ascomycota(0.0300),c:Dothideomycetes(0.0300),o:Dothideales(0.0300),f:Aureobasidiaceae(0.0300),g:Aureobasidium(0.0300),s:Aureobasidium_pullulans_SH014203.07FU(0.0100)	Aureobasidium	13	Pathotroph-Saprotroph-Symbiotroph	Animal Pathogen-Endophyte-Epiphyte-Plant Pathogen-Undefined Saprotroph	Facultative Yeast	NULL	Possible	NULL	b'Costa IPMW, et al. 2012. Mycotaxon 119:26; Tedersoo L, et al. 2014. Science 346:1256688; Wachowska U, Glowacka K. 2014. Biocontrol 59:pp 635-645; Irinyia L, Lacknerb M, de Hoog GS, Meyer W. 2016. Fungal Biology 120:125-136; http://www.apsnet.org/publications/commonnames/Pages/default.aspx'
Zotu1206	d:Fungi(1.0000),p:Ascomycota(0.9200),c:Dothideomycetes(0.8800),o:Pleosporales(0.8800),f:Phaeosphaeriaceae(0.5300),g:Leptosphaeria(0.0300),s:Leptosphaeria_avenaria_SH183009.07FU(0.0300)	Leptosphaeria	13	Pathotroph	Plant Pathogen	NULL	NULL	Probable	NULL	b'Tedersoo L, et al. 2014. Science 346:1256688'
Zotu1207	d:Fungi(1.0000),p:Basidiomycota(1.0000),c:Agaricomycetes(1.0000),o:Agaricales(1.0000),f:Pluteaceae(1.0000),g:Pluteus(1.0000),s:Pluteus_extremiorientalis_SH524080.07FU(0.4800)	Pluteus	13	Pathotroph-Saprotroph	Bryophyte Parasite-Litter Saprotroph-Wood Saprotroph	Agaricoid	White Rot	Probable	NULL	b'Grgurinovic CA, Simpson JA. 2001. Fungal Diversity 8:97-127; James TY, et al. 2006. Nature 443:818-822; Tedersoo L, et al. 2014. Science 346:1256688'
Zotu1208	d:Fungi(1.0000),p:Ascomycota(0.9300),c:Eurotiomycetes(0.3500),o:Eurotiales(0.2900),f:Aspergillaceae(0.2100),g:Aspergillus(0.1100),s:Acarospora_terricola_SH533954.07FU(0.0900)	Acarospora	13	Symbiotroph	Lichenized	Thallus	NULL	Highly Probable	NULL	b'Esslinger TL. 2014. North Dakota State University (http://www.ndsu.edu/pubweb/~esslinge/chcklst/chcklst7.htm)'
Zotu1209	d:Fungi(1.0000),p:Ascomycota(1.0000),c:Sordariomycetes(0.9900),o:Diaporthales(0.9900),f:Diaporthaceae(0.3800),g:Diaporthe(0.3800),s:Diaporthe_infecunda_SH180952.07FU(0.2500)	Diaporthe	13	Pathotroph-Symbiotroph	Endophyte-Plant Pathogen	Microfungus	NULL	Possible	NULL	b'Tedersoo L, et al. 2014. Science 346:1256688'
Zotu121	d:Fungi(1.0000),p:Ascomycota(1.0000),c:Leotiomycetes(1.0000),o:Leotiomycetes_ord_Incertae_sedis(1.0000),f:Pseudeurotiaceae(1.0000)	-	-	-	-	-	-	-	Unassigned	-
Zotu1210	d:Fungi(1.0000),p:Ascomycota(1.0000),c:Sordariomycetes(1.0000),o:Diaporthales(0.9900),f:Harknessiaceae(0.4800),g:Harknessia(0.4800),s:Amphiporthe_leiphaemia_SH190627.07FU(0.1700)	Amphiporthe	13	Saprotroph	Undefined Saprotroph	Microfungus	NULL	Probable	NULL	b'Tedersoo L, et al. 2014. Science 346:1256688'
Zotu1211	d:Fungi(1.0000),p:Ascomycota(1.0000)	-	-	-	-	-	-	-	Unassigned	-
Zotu1212	d:Fungi(1.0000),p:Basidiomycota(0.4200),c:Microbotryomycetes(0.4200),o:Sporidiobolales(0.4200),f:Sporidiobolaceae(0.4200),g:Sporobolomyces(0.4000),s:Sporobolomyces_marcillae_SH194982.07FU(0.2200)	Sporobolomyces	13	Pathotroph-Saprotroph	Fungal Parasite-Litter Saprotroph	Yeast	NULL	Probable	NULL	b'Tedersoo L, et al. 2014. Science 346:1256688; Nagy GL, et al. 2014. Nature Communications 5:4471; Purahong W, et al. 2016. Molecular Ecology 25:4059-4074'
Zotu1213	d:Fungi(1.0000),p:Basidiomycota(1.0000),c:Agaricomycetes(1.0000),o:Agaricales(1.0000),f:Psathyrellaceae(0.9800),g:Coprinopsis(0.3600),s:Coprinopsis_strossmayeri_SH219030.07FU(0.2900)	Coprinopsis	13	Saprotroph	Undefined Saprotroph	NULL	NULL	Probable	NULL	b'Tedersoo L, et al. 2014. Science 346:1256688'
Zotu1214	d:Fungi(1.0000),p:Ascomycota(1.0000),c:Sordariomycetes(0.9700),o:Diaporthales(0.9700),f:Diaporthaceae(0.2600),g:Diaporthe(0.2600),s:Diaporthe_infecunda_SH180952.07FU(0.1500)	Diaporthe	13	Pathotroph-Symbiotroph	Endophyte-Plant Pathogen	Microfungus	NULL	Possible	NULL	b'Tedersoo L, et al. 2014. Science 346:1256688'
Zotu1215	d:Fungi(1.0000),p:Ascomycota(1.0000),c:Leotiomycetes(1.0000),o:Helotiales(1.0000),f:Hyaloscyphaceae(0.5500),g:Hyaloscypha(0.4900),s:Pezoloma_ericae_SH181092.07FU(0.1000)	Pezoloma	13	Pathotroph-Saprotroph-Symbiotroph	Bryophyte Parasite-Ectomycorrhizal-Ericoid Mycorrhizal-Undefined Saprotroph-Wood Saprotroph	Microfungus; Dark Septate Microfungus	NULL	Possible	Syn.: Hymenoscyphus among other (see e.g., Pezoloma ericae)	b'Korf RP. 1999. Mycotaxon 73:493-497; Baral and Krieglsteiner 2006. Acta Mycologica 41:11-20 (as a bryophyte parasite); Huhtinen et al. 2010. Nova Hedwigia 90:413-431, Bent et al. 2011. Applied and Environmental Microbiology 77:3351-3359 (as ectomycorrhizae); Tedersoo L, et al. 2014. Science 346:1256688 (as saprotroph)'
Zotu1216	d:Fungi(1.0000),p:Ascomycota(0.9900),c:Sordariomycetes(0.9900),o:Xylariales(0.9400),f:Xylariaceae(0.9400),g:Hypoxylon(0.8300),s:Hypoxylon_lenormandii_SH527173.07FU(0.5800)	Hypoxylon	13	Saprotroph	Undefined Saprotroph	NULL	NULL	Probable	NULL	b'Tedersoo L, et al. 2014. Science 346:1256688'
Zotu1217	d:Fungi(1.0000),p:Basidiomycota(1.0000),c:Agaricomycetes(0.7400),o:Auriculariales(0.7400),f:Exidiaceae(0.7400),g:Exidia(0.7400),s:Exidia_recisa_SH194578.07FU(0.6400)	Exidia	13	Saprotroph-Symbiotroph	Endophyte-Undefined Saprotroph	Tremelloid	NULL	Probable	NULL	b'Tedersoo L, et al. 2014. Science 346:1256688 (doi:10.1126/science.1256688); David AS, et al. 2016. Microbial Ecology 71:912-926'
Zotu1218	d:Fungi(1.0000),p:Ascomycota(1.0000),c:Eurotiomycetes(1.0000),o:Chaetothyriales(1.0000),f:Herpotrichiellaceae(1.0000),g:Phialophora(1.0000),s:Phialophora_livistonae_SH213231.07FU(1.0000)	Phialophora	13	Pathotroph-Saprotroph-Symbiotroph	Animal Pathogen-Endophyte-Ericoid Mycorrhizal-Plant Pathogen-Wood Saprotroph	Facultative Yeast-Microfungus	NULL	Possible	Consult the current literature for updated names on this paraphyletic grouping that included the Black Yeasts, Dark Septate Endophytes, etc.	b'Nilsson T. 1973. Studies on wood degradation and cellulolytic activity of microfungi. No. 104; de Hoog GS, et al. 2000. Mycoses 43:409-416; Rinaldi AC, et al. 2008. Fungal Diversity 33:1-45; Newsham 2011. New Phytologist 190:783-793 (as DSE); Irinyi L, et al. 2015. Medical Mycology 53:313-337; http://www.apsnet.org/publications/commonnames/Pages/default.aspx'
Zotu1219	d:Fungi(1.0000),p:Ascomycota(0.7200),c:Dothideomycetes(0.5100),o:Pleosporales(0.4200),f:Massarinaceae(0.1300),g:Periconia(0.1100),s:Stagonospora_pseudopaludosa_SH004392.07FU(0.0900)	Stagonospora	13	Pathotroph	Plant Pathogen	Microfungus	NULL	Probable	NULL	b'Tedersoo L, et al. 2014. Science 346:1256688'
Zotu122	d:Fungi(1.0000),p:Ascomycota(0.9800),c:Lecanoromycetes(0.9100),o:Ostropales(0.8900),f:Stictidaceae(0.8900),g:Glomerobolus(0.8400),s:Glomerobolus_gelineus_SH458323.07FU(0.8400)	Glomerobolus	13	Saprotroph	Undefined Saprotroph	NULL	NULL	Probable	NULL	b'Tedersoo L, et al. 2014. Science 346:1256688'
Zotu1220	d:Fungi(1.0000),p:Ascomycota(1.0000),c:Dothideomycetes(1.0000),o:Capnodiales(1.0000),f:Dissoconiaceae(1.0000),g:Pseudoveronaea(1.0000),s:Pseudoveronaea_ellipsoidea_SH190783.07FU(1.0000)	-	-	-	-	-	-	-	Unassigned	-
Zotu1221	d:Fungi(1.0000),p:Ascomycota(0.9900),c:Leotiomycetes(0.9800),o:Helotiales(0.9800),f:Hyaloscyphaceae(0.8300),g:Hyalopeziza(0.5000),s:Hyalopeziza_pygmaea_SH196497.07FU(0.5000)	Hyalopeziza	13	Pathotroph-Saprotroph	Undefined Saprotroph	Microfungus	NULL	Possible	NULL	b'Tedersoo L, et al. 2014. Science 346:1256688; Lawrey JD, Diederich P. 2016. URL: http://www.lichenicolous.net [24 May 2017]'
Zotu1222	d:Fungi(1.0000),p:Ascomycota(1.0000),c:Taphrinomycetes(1.0000),o:Taphrinales(1.0000),f:Taphrinaceae(1.0000),g:Taphrina(1.0000),s:Taphrina_inositophila_SH193597.07FU(0.9800)	Taphrina	13	Pathotroph	Plant Pathogen	NULL	NULL	Probable	NULL	b'http://www.apsnet.org/publications/commonnames/Pages/default.aspx'
Zotu1223	d:Fungi(1.0000),p:Ascomycota(0.8000),c:Dothideomycetes(0.8000),o:Capnodiales(0.3100),f:Cladosporiaceae(0.3000),g:Rachicladosporium(0.2900),s:Rachicladosporium_luculiae_SH018822.07FU(0.1500)	-	-	-	-	-	-	-	Unassigned	-
Zotu1224	d:Fungi(1.0000),p:Ascomycota(1.0000),c:Leotiomycetes(1.0000),o:Helotiales(0.7400),f:Helotiales_fam_Incertae_sedis(0.4800),g:Phialocephala(0.4800),s:Vibrissea_flavovirens_SH212367.07FU(0.1900)	Vibrissea	13	Saprotroph	Undefined Saprotroph	NULL	NULL	Probable	NULL	b'Tedersoo L, et al. 2014. Science 346:1256688 (doi:10.1126/science.1256688)'
Zotu1225	d:Fungi(1.0000),p:Basidiomycota(1.0000),c:Agaricomycetes(1.0000),o:Russulales(1.0000),f:Stereaceae(1.0000),g:Stereum(0.8500),s:Stereum_hirsutum_SH196429.07FU(0.3100)	Stereum	13	Saprotroph	Undefined Saprotroph	NULL	White Rot	Probable	NULL	b'Tedersoo L, et al. 2014. Science 346:1256688'
Zotu1226	d:Fungi(1.0000),p:Ascomycota(1.0000),c:Dothideomycetes(1.0000),o:Pleosporales(1.0000),f:Phaeosphaeriaceae(0.7400),g:Sclerostagonospora(0.7400),s:Teichospora_rubriostiolata_SH526882.07FU(0.0400)	Teichospora	13	Saprotroph	Undefined Saprotroph	NULL	NULL	Probable	NULL	b'Tedersoo L, et al. 2014. Science 346:1256688'
Zotu1227	d:Fungi(1.0000),p:Ascomycota(0.9800),c:Sordariomycetes(0.9800),o:Diaporthales(0.9600),f:Gnomoniaceae(0.4500),g:Gnomoniopsis(0.4500),s:Gnomoniopsis_comari_SH017598.07FU(0.4500)	-	-	-	-	-	-	-	Unassigned	-
Zotu1228	d:Fungi(1.0000),p:Ascomycota(1.0000),c:Dothideomycetes(1.0000),o:Pleosporales(1.0000),f:Leptosphaeriaceae(0.9900),g:Plenodomus(0.9900),s:Plenodomus_lindquistii_SH207507.07FU(0.9900)	Plenodomus	13	Saprotroph	Undefined Saprotroph	NULL	NULL	Probable	NULL	b'Tedersoo L, et al. 2014. Science 346:1256688'
Zotu1229	d:Fungi(1.0000),p:Ascomycota(0.9800),c:Sordariomycetes(0.9800),o:Trichosphaeriales(0.7900),f:Trichosphaeriaceae(0.7900),g:Nigrospora(0.7900),s:Nigrospora_oryzae_SH177637.07FU(0.7400)	Nigrospora	13	Saprotroph	Undefined Saprotroph	NULL	NULL	Probable	NULL	b'Tedersoo L, et al. 2014. Science 346:1256688'
Zotu123	d:Fungi(1.0000),p:Ascomycota(1.0000),c:Dothideomycetes(1.0000),o:Capnodiales(0.7600),f:Cladosporiaceae(0.3800),g:Cladosporium(0.3800),s:Cladosporium_grevilleae_SH176536.07FU(0.2300)	Cladosporium	13	Pathotroph-Saprotroph-Symbiotroph	Animal Pathogen-Endophyte-Lichen Parasite-Plant Pathogen-Wood Saprotroph	Microfungus	NULL	Possible	NULL	b'Seehann G, et al. 1975. List of Fungi in Soft-Rot Tissue Tests. Institute fur Holzbiologie und Holzschutz, Bundesforschungsanstalt fur Forst - und Holzwirtshaft, Hamburg - Lohbrugge, Germany; Lawrey JD, Diederich P. 2016. URL: http://www.lichenicolous.net [24 May 2017]; http://www.apsnet.org/publications/commonnames/Pages/default.aspx'
Zotu1230	d:Fungi(1.0000),p:Ascomycota(0.4500),c:Sordariomycetes(0.4500),o:Xylariales(0.4400),f:Microdochiaceae(0.4200),g:Microdochium(0.4200),s:Microdochium_trichocladiopsis_SH213515.07FU(0.2200)	Microdochium	13	Pathotroph-Symbiotroph	Endophyte-Plant Pathogen	Dark Septate Endophyte	NULL	Possible	NULL	b'Tedersoo L, et al. 2014. Science 346:1256688 (as plant pathogen); Mandyam et al. 2012. Mycorrhiza 22:109-119 (as DSE).'
Zotu1231	d:Fungi(1.0000),p:Basidiomycota(0.4700),c:Tremellomycetes(0.4700),o:Filobasidiales(0.4700),f:Filobasidiaceae(0.4700),g:Naganishia(0.4700),s:Naganishia_albida_SH206549.07FU(0.4700)	-	-	-	-	-	-	-	Unassigned	-
Zotu1232	d:Fungi(1.0000),p:Ascomycota(1.0000),c:Sordariomycetes(1.0000),o:Hypocreales(1.0000),f:Nectriaceae(1.0000),g:Gibberella(0.6200),s:Gibberella_tricincta_SH219674.07FU(0.5200)	Gibberella	13	Pathotroph	Plant Pathogen	NULL	NULL	Probable	NULL	b'Tedersoo L, et al. 2014. Science 346:1256688'
Zotu1233	d:Fungi(1.0000),p:Ascomycota(0.7800),c:Ascomycota_cls_Incertae_sedis(0.1500),o:Ascomycota_ord_Incertae_sedis(0.1500),f:Ascomycota_fam_Incertae_sedis(0.1500),g:Retiarius(0.1500)	-	-	-	-	-	-	-	Unassigned	-
Zotu1234	d:Fungi(1.0000),p:Basidiomycota(0.9300),c:Agaricomycetes(0.4100),o:Polyporales(0.4000)	-	-	-	-	-	-	-	Unassigned	-
Zotu1235	d:Fungi(1.0000),p:Ascomycota(0.9900),c:Sordariomycetes(0.9900),o:Sordariales(0.0300),f:Chaetomiaceae(0.0100),g:Chaetomium(0.0100),s:Conicomyces_pseudotransvaalensis_SH487706.07FU(0.0100)	-	-	-	-	-	-	-	Unassigned	-
Zotu1236	d:Fungi(1.0000),p:Ascomycota(1.0000),c:Dothideomycetes(1.0000),o:Pleosporales(1.0000),f:Pleosporaceae(1.0000),g:Stemphylium(0.8900),s:Stemphylium_herbarum_SH199527.07FU(0.7000)	Stemphylium	13	Pathotroph-Saprotroph	Plant Pathogen-Wood Saprotroph	NULL	Soft Rot	Highly Probable	NULL	b'Duncan CG, Eslyn WE. 1966. Mycologia 58:642-664; Seehann G, et al. 1975. List of Fungi in Soft-Rot Tissue Tests. Institute fur Holzbiologie und Holzschutz, Bundesforschungsanstalt fur Forst - und Holzwirtshaft, Hamburg - Lohbrugge, Germany; Costa IPMW, et al. 2012. Mycotaxon 119:26; Tedersoo L, et al. 2014. Science 346:1256688; http://www.apsnet.org/publications/commonnames/Pages/default.aspx'
Zotu1237	d:Fungi(1.0000),p:Ascomycota(1.0000),c:Dothideomycetes(1.0000),o:Capnodiales(1.0000),f:Teratosphaeriaceae(1.0000),g:Catenulostroma(0.9500),s:Catenulostroma_hermanusense_SH214166.07FU(0.9500)	Catenulostroma	13	Pathotroph	Plant Pathogen	NULL	NULL	Probable	NULL	b'Tedersoo L, et al. 2014. Science 346:1256688'
Zotu1238	d:Fungi(1.0000),p:Ascomycota(1.0000),c:Dothideomycetes(1.0000),o:Dothideales(0.9800),f:Dothioraceae(0.9800)	-	-	-	-	-	-	-	Unassigned	-
Zotu1239	d:Fungi(1.0000),p:Basidiomycota(0.9400),c:Agaricomycetes(0.6200),o:Agaricales(0.4300),f:Cortinariaceae(0.1200),g:Cortinarius(0.1100),s:Inocybe_chelanensis_SH188063.07FU(0.0200)	Inocybe	13	Symbiotroph	Ectomycorrhizal	Agaricoid	NULL	Highly Probable	Sensu stricto (Matheny 2009).	b'Rinaldi AC, et al. 2008. Fungal Diversity 33:1-45; Matheny PB. 2009. McIlvainea 18:11-21; Tedersoo L, et al. 2010. Mycorrhiza 20:217-263; http://mycorrhizas.info/ecmf.html'
Zotu124	d:Fungi(1.0000),p:Ascomycota(1.0000),c:Dothideomycetes(0.8600),o:Capnodiales(0.7700),f:Mycosphaerellaceae(0.7700),g:Ramularia(0.7600),s:Ramularia_nyssicola_SH206773.07FU(0.3400)	Ramularia	13	Pathotroph	Plant Pathogen	Microfungus	NULL	Probable	NULL	b'Tedersoo L, et al. 2014. Science 346:1256688'
Zotu1240	d:Fungi(1.0000),p:Basidiomycota(0.9100),c:Malasseziomycetes(0.9100),o:Malasseziales(0.9100),f:Malasseziaceae(0.9100),g:Malassezia(0.9100),s:Malassezia_restricta_SH176394.07FU(0.8600)	Malassezia	13	Pathotroph-Saprotroph	Animal Pathogen-Undefined Saprotroph	Facultative Yeast	NULL	Probable	A lipid-dependent fungus growing on the sebaceous areas of human skin that may cause or exacerbate several skin diseases (Pityrosporum is a synonym that has been used for the yeast forms)	b'Findley K, et al. 2013. Nature 498:367-370'
Zotu1241	d:Fungi(1.0000),p:Basidiomycota(1.0000),c:Cystobasidiomycetes(1.0000),o:Cystobasidiomycetes_ord_Incertae_sedis(1.0000),f:Cystobasidiomycetes_fam_Incertae_sedis(1.0000),g:Buckleyzyma(1.0000),s:Buckleyzyma_aurantiaca_SH207116.07FU(1.0000)	Buckleyzyma	13	Saprotroph	Undefined Saprotroph	Yeast	NULL	Probable	NULL	b'Wang QM, et al. 2015. Studies in Mycology 81:149-189 (https://doi.org/10.1016/j.simyco.2015.12.002)'
Zotu1242	d:Fungi(1.0000),p:Ascomycota(1.0000),c:Eurotiomycetes(1.0000),o:Eurotiales(1.0000),f:Aspergillaceae(1.0000),g:Aspergillus(1.0000),s:Aspergillus_nomius_SH432424.07FU(0.4500)	Aspergillus	13	Pathotroph-Saprotroph-Symbiotroph	Endophyte-Animal Pathogen-Plant Saprotroph-Soil Saprotroph-Undefined Saprotroph-Wood Saprotroph	Microfungus	NULL	Probable	NULL	b'Seehann G, et al. 1975. List of Fungi in Soft-Rot Tissue Tests. Institute fur Holzbiologie und Holzschutz, Bundesforschungsanstalt fur Forst - und Holzwirtshaft, Hamburg - Lohbrugge, Germany; Tedersoo L, et al. 2014. Science 346:1256688; Irinyi L, et al. 2015. Medical Mycology 53:313-337; Massimo NC, et al. 2015. Microbial Ecology 70:61-76; http://www.apsnet.org/publications/commonnames/Pages/d…
Zotu1243	d:Fungi(1.0000),p:Ascomycota(0.9800),c:Sordariomycetes(0.9800),o:Sordariales(0.9800),f:Lasiosphaeriaceae(0.8700),g:Podospora(0.7800),s:Podospora_intestinacea_SH202182.07FU(0.0100)	Podospora	13	Saprotroph-Symbiotroph	Dung Saprotroph-Endophyte-Litter Saprotroph-Undefined Saprotroph	Microfungus	NULL	Possible	Endophyte detection method-culture (David et al. 2016)	b'Bell A. 1983. Dung Fungi: An Illustrated Guide to Coprophilous Fungi in New Zealand. Victoria University Press, Wellington; Tedersoo L, et al. 2014. Science 346:1256688; David AS, et al. 2016. Microbial Ecology 71:912-926; Purahong W, et al. 2016. Molecular Ecology 25:4059-4074 (as litter saprotroph)'
Zotu1244	d:Fungi(1.0000),p:Ascomycota(0.9700),c:Sordariomycetes(0.9100),o:Xylariales(0.7200),f:Xylariaceae(0.5300),g:Lopadostoma(0.3400),s:Lopadostoma_polynesium_SH462418.07FU(0.3400)	Lopadostoma	13	Saprotroph	Undefined Saprotroph	NULL	NULL	Probable	NULL	b'Tedersoo L, et al. 2014. Science 346:1256688'
Zotu1245	d:Fungi(1.0000),p:Basidiomycota(0.9400),c:Malasseziomycetes(0.9400),o:Malasseziales(0.9400),f:Malasseziaceae(0.9400),g:Malassezia(0.9400),s:Malassezia_restricta_SH176394.07FU(0.6200)	Malassezia	13	Pathotroph-Saprotroph	Animal Pathogen-Undefined Saprotroph	Facultative Yeast	NULL	Probable	A lipid-dependent fungus growing on the sebaceous areas of human skin that may cause or exacerbate several skin diseases (Pityrosporum is a synonym that has been used for the yeast forms)	b'Findley K, et al. 2013. Nature 498:367-370'
Zotu1246	d:Fungi(1.0000),p:Ascomycota(0.8700),c:Leotiomycetes(0.8500),o:Helotiales(0.8500),f:Helotiales_fam_Incertae_sedis(0.7200),g:Phialocephala(0.3500),s:Phialocephala_scopiformis_SH218120.07FU(0.1300)	Phialocephala	13	Symbiotroph	Endophyte	NULL	NULL	Highly Probable	Dark Septate Endophyte, known from plant roots.	b'Newsham 2011. New Phytologist 190:783-793 (as DSE)'
Zotu1247	d:Fungi(1.0000),p:Ascomycota(1.0000),c:Sordariomycetes(0.9700),o:Diaporthales(0.9700),f:Diaporthaceae(0.4400),g:Diaporthe(0.4400),s:Diaporthe_gardeniae_SH012070.07FU(0.1200)	Diaporthe	13	Pathotroph-Symbiotroph	Endophyte-Plant Pathogen	Microfungus	NULL	Possible	NULL	b'Tedersoo L, et al. 2014. Science 346:1256688'
Zotu1248	d:Fungi(1.0000),p:Basidiomycota(1.0000),c:Agaricomycetes(1.0000),o:Agaricales(1.0000),f:Psathyrellaceae(1.0000),g:Psathyrella(1.0000),s:Psathyrella_candolleana_SH220347.07FU(0.7300)	Psathyrella	13	Saprotroph	Wood Saprotroph	Agaricoid	NULL	Probable	NULL	b'Tedersoo L, et al. 2014. Science 346:1256688'
Zotu1249	d:Fungi(1.0000),p:Ascomycota(1.0000),c:Dothideomycetes(0.3200),o:Capnodiales(0.3200),f:Teratosphaeriaceae(0.3200),g:Xenopenidiella(0.1500),s:Xenopenidiella_rigidophora_SH017703.07FU(0.1500)	-	-	-	-	-	-	-	Unassigned	-
Zotu125	d:Fungi(1.0000),p:Ascomycota(1.0000),c:Leotiomycetes(0.9900),o:Helotiales(0.8100),f:Dermateaceae(0.7800),g:Calloria(0.7800),s:Calloria_urticae_SH529064.07FU(0.7800)	-	-	-	-	-	-	-	Unassigned	-
Zotu1250	d:Fungi(1.0000),p:Basidiomycota(1.0000),c:Agaricomycetes(1.0000),o:Agaricales(1.0000),f:Amanitaceae(1.0000),g:Amanita(1.0000),s:Amanita_morrisii_SH522319.07FU(0.1900)	Amanita	13	Symbiotroph	Ectomycorrhizal	Agaricoid	NULL	Highly Probable	NULL	b'Rinaldi AC, et al. 2008. Fungal Diversity 33:1-45; Tedersoo L, et al. 2010. Mycorrhiza 20:217-263; http://mycorrhizas.info/ecmf.html'
Zotu1251	d:Fungi(1.0000),p:Basidiomycota(1.0000),c:Agaricomycetes(1.0000),o:Agaricales(1.0000),f:Psathyrellaceae(0.9700),g:Parasola(0.9100),s:Parasola_conopilus_SH220649.07FU(0.8900)	Parasola	13	Saprotroph	Undefined Saprotroph	Agaricoid	NULL	Probable	NULL	b'Tedersoo L, et al. 2014. Science 346:1256688'
Zotu1252	d:Fungi(1.0000),p:Basidiomycota(1.0000),c:Agaricomycetes(1.0000),o:Agaricales(1.0000)	-	-	-	-	-	-	-	Unassigned	-
Zotu1253	d:Fungi(1.0000),p:Mortierellomycota(0.9800),c:Mortierellomycetes(0.9800),o:Mortierellales(0.9800),f:Mortierellaceae(0.9800),g:Mortierella(0.9700),s:Mortierella_sarnyensis_SH192693.07FU(0.6000)	Mortierella	13	Saprotroph-Symbiotroph	Endophyte-Litter Saprotroph-Soil Saprotroph-Undefined Saprotroph	Microfungus	NULL	Probable	Saprobic in soil and thus frequenctly isolated from soil and material contaminated with soil such as hay or rotten silage and spoil tips (Cannon & Kirk 2007)	b'Cannon PF, Kirk PM. 2007. Fungal Families of the World. CAB International, Cambridge; Tedersoo L, et al. 2014. Science 346:1256688; Purahong W, et al. 2016. Molecular Ecology 25:4059-407'
Zotu1254	d:Fungi(1.0000),p:Basidiomycota(0.9100),c:Agaricomycetes(0.5700),o:Agaricales(0.2100),f:Corticiaceae(0.0900),g:Cystofilobasidium(0.0800),s:Cystostereum_murrayi_SH490848.07FU(0.0600)	Cystostereum	13	Saprotroph	Wood Saprotroph	Corticioid	White Rot	Probable	On rotting coniferous or angiosperm wood, probably saprobic (Cannon & Kirk 2007)	b'Cannon PF, Kirk PM. 2007. Fungal Families of the World. CAB International, Cambridge; Tedersoo L, et al. 2014. Science 346:1256688 (doi:10.1126/science.1256688)'
Zotu1255	d:Fungi(1.0000),p:Ascomycota(0.9700),c:Dothideomycetes(0.9700),o:Pleosporales(0.9700),f:Phaeosphaeriaceae(0.5600),g:Paraphoma(0.4600),s:Paraphoma_chrysanthemicola_SH208737.07FU(0.3300)	-	-	-	-	-	-	-	Unassigned	-
Zotu1256	d:Fungi(1.0000),p:Ascomycota(1.0000),c:Sordariomycetes(1.0000),o:Hypocreales(0.9900),f:Hypocreaceae(0.8500),g:Trichoderma(0.8500),s:Chaetomium_globosum_SH489927.07FU(0.0100)	Chaetomium	13	Pathotroph-Saprotroph-Symbiotroph	Animal Pathogen-Dung Saprotroph-Endophyte-Epiphyte-Plant Saprotroph-Wood Saprotroph	Microfungus	Soft Rot	Possible	Saprobic, acting as key decay organisms of plant materials and plant-derived commodities (Cannon & Kirk 2007); Epiphyte detection method-culture (Massimo et al. 2015); Endophyte detection method-culture (Busby et al. 2016, David et al. 2016); Likely opportunistic human pathogen (Irinyi et al. 2015)	b'Seehann G, et al. 1975. List of Fungi in Soft-Rot Tissue Tests. Institute fur Holzbiologie und Holzschutz, Bundesforschungsanstalt fur Forst - und Holzwirtshaft, Hamburg - Lohbrugge, Germany; Cannon PF, Kirk PM. 2007. Fungal Families of the World. CAB International, Cambridge; Bills GF, et al. 2013. Current Opinion in microbiology, 16:549-565; Tedersoo L, et al. 2014. Science 346:1256688; Iriny…
Zotu1257	d:Fungi(1.0000),p:Ascomycota(1.0000),c:Dothideomycetes(0.9900),o:Pleosporales(0.8400),f:Montagnulaceae(0.3300),g:Camarosporium(0.0500),s:Montagnula_aloes_SH004895.07FU(0.0200)	Montagnula	13	Saprotroph	Undefined Saprotroph	NULL	NULL	Probable	NULL	b'Tedersoo L, et al. 2014. Science 346:1256688'
Zotu1258	d:Fungi(1.0000),p:Ascomycota(0.9600),c:Dothideomycetes(0.1000),o:Myriangiales(0.0200),f:Phyllostictaceae(0.0100),g:Valsaria(0.0100),s:Valsaria_lopadostomoides_SH521453.07FU(0.0100)	Valsaria	13	Saprotroph	Wood Saprotroph	Microfungus	NULL	Highly Probable	Generally occur in little to moderately decayed bark (Jaklitsch et al. 2015)	b'Jaklitsch WM, et al. 2015. Fungal Diversity 73:159-202'
Zotu1259	d:Fungi(1.0000),p:Basidiomycota(1.0000),c:Agaricomycetes(1.0000),o:Agaricales(1.0000),f:Tricholomataceae(1.0000),g:Lepista(0.9400),s:Lepista_sordida_SH218328.07FU(0.8800)	Lepista	13	Saprotroph	Undefined Saprotroph	Agaricoid	NULL	Probable	NULL	b'Tedersoo L, et al. 2014. Science 346:1256688'
Zotu126	d:Fungi(1.0000),p:Ascomycota(1.0000),c:Sordariomycetes(0.9700),o:Xylariales(0.9700),f:Xylariaceae(0.6300),g:Hypoxylon(0.6300),s:Hypoxylon_notatum_SH199316.07FU(0.0300)	Hypoxylon	13	Saprotroph	Undefined Saprotroph	NULL	NULL	Probable	NULL	b'Tedersoo L, et al. 2014. Science 346:1256688'
Zotu1260	d:Fungi(1.0000)	-	-	-	-	-	-	-	Unassigned	-
Zotu1261	d:Fungi(1.0000),p:Basidiomycota(1.0000),c:Agaricomycetes(1.0000),o:Cantharellales(0.0500),f:Clavulinaceae(0.0300),g:Clavulina(0.0300)	-	-	-	-	-	-	-	Unassigned	-
Zotu1262	d:Fungi(1.0000),p:Ascomycota(0.9800),c:Leotiomycetes(0.8900),o:Helotiales(0.8900),f:Helotiales_fam_Incertae_sedis(0.4700),g:Coleophoma(0.4700),s:Coleophoma_proteae_SH004865.07FU(0.0400)	Coleophoma	13	Saprotroph	Undefined Saprotroph	NULL	NULL	Probable	NULL	b'Tedersoo L, et al. 2014. Science 346:1256688'
Zotu1263	d:Fungi(1.0000),p:Basidiomycota(1.0000),c:Agaricomycetes(1.0000),o:Corticiales(1.0000),f:Corticiaceae(1.0000),g:Phlebia(1.0000),s:Phlebia_tremellosa_SH175372.07FU(1.0000)	Phlebia	13	Saprotroph	Wood Saprotroph	Corticioid	White Rot	Highly Probable	NULL	b'Kirk PM, et al. 2008. Dictionary of the Fungi 10th ed. Wallingford, CABI'
Zotu1264	d:Fungi(1.0000),p:Ascomycota(0.9600),c:Dothideomycetes(0.9500),o:Pleosporales(0.9400),f:Phaeosphaeriaceae(0.9400),g:Muriphaeosphaeria(0.9200)	-	-	-	-	-	-	-	Unassigned	-
Zotu1265	d:Fungi(1.0000),p:Ascomycota(1.0000),c:Sordariomycetes(0.9300),o:Diaporthales(0.9300),f:Diaporthaceae(0.4700),g:Diaporthe(0.4400),s:Diaporthe_convolvuli_SH495082.07FU(0.1500)	Diaporthe	13	Pathotroph-Symbiotroph	Endophyte-Plant Pathogen	Microfungus	NULL	Possible	NULL	b'Tedersoo L, et al. 2014. Science 346:1256688'
Zotu1266	d:Fungi(1.0000),p:Basidiomycota(1.0000),c:Agaricomycetes(1.0000),o:Corticiales(0.0400),f:Corticiaceae(0.0400),g:Corticium(0.0200),s:Xylodon_sambuci_SH185877.07FU(0.0200)	Xylodon	13	Saprotroph	Undefined Saprotroph	Corticioid	White Rot	Probable	NULL	b'Tedersoo L, et al. 2014. Science 346:1256688'
Zotu1267	d:Fungi(1.0000),p:Basidiomycota(1.0000),c:Wallemiomycetes(1.0000),o:Wallemiales(1.0000),f:Wallemiales_fam_Incertae_sedis(1.0000),g:Wallemia(1.0000),s:Wallemia_muriae_SH216454.07FU(0.8000)	Wallemia	13	Saprotroph	Undefined Saprotroph	NULL	NULL	Probable	NULL	b'Tedersoo L, et al. 2014. Science 346:1256688 (doi:10.1126/science.1256688)'
Zotu1268	d:Fungi(1.0000),p:Ascomycota(0.5700),c:Dothideomycetes(0.5700),o:Capnodiales(0.3500),f:Cladosporiaceae(0.3100),g:Rachicladosporium(0.3100),s:Rachicladosporium_luculiae_SH018822.07FU(0.1200)	-	-	-	-	-	-	-	Unassigned	-
Zotu1269	d:Fungi(1.0000),p:Ascomycota(0.9700),c:Dothideomycetes(0.9700),o:Pleosporales(0.9600),f:Didymellaceae(0.5400),g:Didymella(0.3300),s:Coniothyrium_multiporum_SH019598.07FU(0.0600)	Coniothyrium	13	Pathotroph-Saprotroph	Plant Pathogen-Wood Saprotroph	NULL	Soft Rot	Highly Probable	NULL	b'Duncan CG, Eslyn WE. 1966. Mycologia 58:642-664; Nilsson T. 1973. Studies on wood degradation and cellulolytic activity of microfungi. No. 104; Seehann G, et al. 1975. List of Fungi in Soft-Rot Tissue Tests. Institute fur Holzbiologie und Holzschutz, Bundesforschungsanstalt fur Forst - und Holzwirtshaft, Hamburg - Lohbrugge, Germany; http://www.apsnet.org/publications/commonnames/Pages/default.…
Zotu127	d:Fungi(1.0000),p:Ascomycota(0.9500),c:Dothideomycetes(0.8400),o:Myriangiales(0.7300),f:Elsinoaceae(0.5400),g:Myriangium(0.0900),s:Sphaceloma_tectificae_SH013191.07FU(0.0400)	Sphaceloma	13	Pathotroph	Plant Pathogen	NULL	NULL	Probable	NULL	b'Tedersoo L, et al. 2014. Science 346:1256688'
Zotu1270	d:Fungi(1.0000),p:Ascomycota(1.0000),c:Sordariomycetes(1.0000),o:Diaporthales(1.0000),f:Cryphonectriaceae(0.7700),g:Aurantiosacculus(0.6100),s:Aurantiosacculus_eucalyptorum_SH096965.07FU(0.5000)	Aurantiosacculus	13	Pathotroph	Plant Pathogen	Microfungus	NULL	Highly Probable	From leaf spots (Crous et al. 2012)	b'Crous PW, et al. 2012. Persoonia 28:66-75'
Zotu1271	d:Fungi(1.0000),p:Basidiomycota(1.0000),c:Tremellomycetes(1.0000),o:Trichosporonales(1.0000),f:Trichosporonaceae(1.0000),g:Apiotrichum(0.9900),s:Apiotrichum_xylopini_SH262855.07FU(0.3600)	Apiotrichum	13	Saprotroph	Soil Saprotroph	Microfungus	NULL	Possible	From forest soil (Calduch et al. 2002)	b'Calduch M, et al. 2002. Mycologia 94:355-361'
Zotu1272	d:Fungi(1.0000),p:Ascomycota(0.9500),c:Dothideomycetes(0.8800),o:Pleosporales(0.8800),f:Phaeosphaeriaceae(0.2500),g:Phaeosphaeria(0.1500),s:Phaeosphaeria_spartinae_SH212722.07FU(0.1500)	Phaeosphaeria	13	Saprotroph	Undefined Saprotroph	NULL	NULL	Probable	NULL	b'Tedersoo L, et al. 2014. Science 346:1256688'
Zotu1273	d:Fungi(1.0000),p:Ascomycota(1.0000),c:Sordariomycetes(1.0000),o:Hypocreales(1.0000),f:Hypocreaceae(0.0800),g:Pseudocosmospora(0.0100)	-	-	-	-	-	-	-	Unassigned	-
Zotu1274	d:Fungi(1.0000),p:Ascomycota(0.9800),c:Dothideomycetes(0.8000),o:Myriangiales(0.8000),f:Elsinoaceae(0.5600),g:Sphaceloma(0.1500),s:Sphaceloma_protearum_SH194113.07FU(0.0700)	Sphaceloma	13	Pathotroph	Plant Pathogen	NULL	NULL	Probable	NULL	b'Tedersoo L, et al. 2014. Science 346:1256688'
Zotu1275	d:Fungi(1.0000),p:Basidiomycota(1.0000),c:Agaricomycetes(1.0000),o:Polyporales(1.0000)	-	-	-	-	-	-	-	Unassigned	-
Zotu1276	d:Fungi(1.0000),p:Ascomycota(0.9800),c:Dothideomycetes(0.9800),o:Pleosporales(0.9800),f:Phaeosphaeriaceae(0.0100)	-	-	-	-	-	-	-	Unassigned	-
Zotu1277	d:Fungi(1.0000),p:Ascomycota(1.0000),c:Sordariomycetes(1.0000),o:Xylariales(0.9800),f:Xylariaceae(0.9800),g:Daldinia(0.9800),s:Daldinia_loculata_SH212983.07FU(0.4400)	Daldinia	13	Saprotroph	Undefined Saprotroph	NULL	NULL	Probable	NULL	b'Tedersoo L, et al. 2014. Science 346:1256688'
Zotu1278	d:Fungi(1.0000),p:Ascomycota(0.9700),c:Sordariomycetes(0.9200),o:Xylariales(0.6600),f:Xylariaceae(0.4400),g:Lopadostoma(0.2400),s:Lopadostoma_polynesium_SH462418.07FU(0.2300)	Lopadostoma	13	Saprotroph	Undefined Saprotroph	NULL	NULL	Probable	NULL	b'Tedersoo L, et al. 2014. Science 346:1256688'
Zotu1279	d:Fungi(1.0000),p:Basidiomycota(1.0000)	-	-	-	-	-	-	-	Unassigned	-
Zotu128	d:Fungi(1.0000),p:Ascomycota(0.9300),c:Dothideomycetes(0.7900),o:Myriangiales(0.5300),f:Elsinoaceae(0.2300),g:Myriangium(0.0700),s:Stenella_araguata_SH631423.07FU(0.0500)	Stenella	13	Saprotroph	Undefined Saprotroph	NULL	NULL	Probable	NULL	b'Tedersoo L, et al. 2014. Science 346:1256688'
Zotu1280	d:Fungi(1.0000),p:Ascomycota(1.0000),c:Leotiomycetes(1.0000),o:Helotiales(1.0000),f:Hyaloscyphaceae(0.9700),g:Lachnum(0.5800),s:Lachnum_nudipes_SH018517.07FU(0.0300)	Lachnum	13	Saprotroph	Undefined Saprotroph	Microfungus	NULL	Probable	NULL	b'Tedersoo L, et al. 2014. Science 346:1256688'
Zotu1281	d:Fungi(1.0000),p:Ascomycota(0.9700),c:Dothideomycetes(0.9700),o:Pleosporales(0.9700),f:Leptosphaeriaceae(0.9600),g:Sphaerellopsis(0.9500),s:Sphaerellopsis_filum_SH217288.07FU(0.9500)	Sphaerellopsis	13	Saprotroph	Undefined Saprotroph	NULL	NULL	Probable	NULL	b'Tedersoo L, et al. 2014. Science 346:1256688'
Zotu1282	d:Fungi(1.0000),p:Ascomycota(0.9400),c:Sordariomycetes(0.9400),o:Xylariales(0.9400),f:Sporocadaceae(0.7300),g:Immersidiscosia(0.6400),s:Immersidiscosia_eucalypti_SH200160.07FU(0.6400)	Immersidiscosia	13	Pathotroph	Plant Pathogen	NULL	NULL	Probable	NULL	b'Tedersoo L, et al. 2014. Science 346:1256688'
Zotu1283	d:Fungi(1.0000),p:Ascomycota(1.0000),c:Dothideomycetes(1.0000),o:Capnodiales(1.0000),f:Mycosphaerellaceae(1.0000)	-	-	-	-	-	-	-	Unassigned	-
Zotu1284	d:Fungi(1.0000),p:Ascomycota(0.7900),c:Sordariomycetes(0.7900),o:Xylariales(0.7600),f:Amphisphaeriaceae(0.1400),g:Lepteutypa(0.0700),s:Lepteutypa_fuckelii_SH530116.07FU(0.0700)	Lepteutypa	13	Pathotroph	Plant Pathogen	NULL	NULL	Probable	NULL	b'http://www.apsnet.org/publications/commonnames/Pages/default.aspx'
Zotu1285	d:Fungi(1.0000),p:Basidiomycota(0.2100),c:Cystobasidiomycetes(0.2100),o:Erythrobasidiales(0.2100),f:Erythrobasidiaceae(0.2100),g:Erythrobasidium(0.2100),s:Erythrobasidium_hasegawianum_SH194739.07FU(0.2100)	Erythrobasidium	13	Saprotroph	Undefined Saprotroph	Yeast	NULL	Possible	NULL	b'Sugiyama J, Hamamoto M. 1998. The Yeasts 4:654-655 (https://doi.org/10.1016/B978-044481312-1/50086-1)'
Zotu1286	d:Fungi(1.0000),p:Basidiomycota(0.8100),c:Agaricostilbomycetes(0.6800),o:Agaricostilbomycetes_ord_Incertae_sedis(0.4600),f:Agaricostilbomycetes_fam_Incertae_sedis(0.4600),g:Jianyunia(0.4600),s:Jianyunia_sakaguchii_SH220502.07FU(0.4600)	-	-	-	-	-	-	-	Unassigned	-
Zotu1287	d:Fungi(1.0000),p:Basidiomycota(1.0000),c:Agaricomycetes(1.0000),o:Agaricales(1.0000),f:Tricholomataceae(0.3500),g:Mycena(0.3500),s:Mycena_maculata_SH220747.07FU(0.2000)	Mycena	13	Pathotroph-Saprotroph	Leaf Saprotroph-Plant Pathogen-Undefined Saprotroph-Wood Saprotroph	Agaricoid	NULL	Probable	NULL	b'Grgurinovic CA, Simpson JA. 2001. Fungal Diversity 8:97-127; Tedersoo L, et al. 2014. Science 346:1256688; http://www.apsnet.org/publications/commonnames/Pages/default.aspx'
Zotu1288	d:Fungi(1.0000),p:Ascomycota(0.9200),c:Sordariomycetes(0.9200),o:Microascales(0.9200),f:Halosphaeriaceae(0.9200)	-	-	-	-	-	-	-	Unassigned	-
Zotu1289	d:Fungi(1.0000),p:Basidiomycota(1.0000),c:Agaricomycetes(1.0000),o:Cantharellales(1.0000),f:Ceratobasidiaceae(1.0000),g:Ceratobasidium(0.5800),s:Thanatephorus_cucumeris_SH218657.07FU(0.0100)	Thanatephorus	13	Pathotroph	Plant Pathogen	NULL	NULL	Probable	NULL	b'Tedersoo L, et al. 2014. Science 346:1256688'
Zotu129	d:Fungi(1.0000),p:Ascomycota(1.0000),c:Dothideomycetes(0.9800),o:Pleosporales(0.9800),f:Massarinaceae(0.3300),g:Stagonospora(0.3300),s:Parastagonospora_avenae_SH630490.07FU(0.0100)	-	-	-	-	-	-	-	Unassigned	-
Zotu1290	d:Fungi(1.0000),p:Ascomycota(0.2400),c:Sordariomycetes(0.0100),o:Pezizales(0.0100),f:Mycosphaerellaceae(0.0100),g:Mycosphaerella(0.0100),s:Mycosphaerella_pruni-persicae_SH206806.07FU(0.0100)	Mycosphaerella	13	Pathotroph	Plant Pathogen	Microfungus	NULL	Probable	NULL	b'Tedersoo L, et al. 2014. Science 346:1256688'
Zotu1291	d:Fungi(1.0000),p:Ascomycota(1.0000),c:Eurotiomycetes(1.0000),o:Chaetothyriales(1.0000),f:Herpotrichiellaceae(1.0000),g:Exophiala(0.6400),s:Exophiala_pisciphila_SH197644.07FU(0.0600)	Exophiala	13	Pathotroph-Saprotroph	Animal Pathogen-Undefined Saprotroph	Facultative Yeast	NULL	Probable	NULL	b'Tedersoo L, et al. 2014. Science 346:1256688, Nagy GL, et al. 2014. Nature Communications 5:4471'
Zotu1292	d:Fungi(1.0000),p:Basidiomycota(1.0000),c:Cystobasidiomycetes(0.9300),o:Cystobasidiales(0.8800),f:Cystobasidiales_fam_Incertae_sedis(0.7800),g:Occultifur(0.7800),s:Occultifur_externus_SH194784.07FU(0.7600)	-	-	-	-	-	-	-	Unassigned	-
Zotu1293	d:Fungi(1.0000),p:Ascomycota(0.8100),c:Dothideomycetes(0.5000),o:Helotiales(0.0200),f:Xylariaceae(0.0100),g:Nemania(0.0100),s:Stenella_araguata_SH631423.07FU(0.0100)	Stenella	13	Saprotroph	Undefined Saprotroph	NULL	NULL	Probable	NULL	b'Tedersoo L, et al. 2014. Science 346:1256688'
Zotu1294	d:Fungi(1.0000),p:Ascomycota(0.3500),c:Dothideomycetes(0.3200),o:Capnodiales(0.3200)	-	-	-	-	-	-	-	Unassigned	-
Zotu1295	d:Fungi(1.0000),p:Ascomycota(1.0000),c:Sordariomycetes(1.0000),o:Xylariales(1.0000),f:Cainiaceae(1.0000),g:Atrotorquata(1.0000),s:Atrotorquata_lineata_SH463643.07FU(1.0000)	Atrotorquata	13	Saprotroph	Undefined Saprotroph	NULL	NULL	Probable	NULL	b'Tedersoo L, et al. 2014. Science 346:1256688'
Zotu1296	d:Fungi(1.0000),p:Basidiomycota(1.0000),c:Agaricomycetes(1.0000),o:Agaricales(1.0000),f:Tricholomataceae(1.0000),g:Clitocybe(1.0000),s:Clitocybe_nebularis_SH218329.07FU(1.0000)	Clitocybe	13	Pathotroph-Saprotroph	NULL	NULL	NULL	Probable	NULL	b'Tedersoo L, et al. 2014. Science 346:1256688'
Zotu1297	d:Fungi(1.0000),p:Ascomycota(0.9600),c:Dothideomycetes(0.9000),o:Pleosporales(0.9000),f:Pleosporaceae(0.8100),g:Alternaria(0.4300),s:Pleospora_scirpicola_SH029228.07FU(0.2800)	Pleospora	13	Pathotroph-Saprotroph	Endophyte-Lichen Parasite-Plant Pathogen-Undefined Saprotroph	Microfungus	NULL	Probable	Necrotrophic pathogens and saprobes, especially associated with grasses. Many species are seed-borne (Cannon & Kirk 2007)	b'Cannon PF, Kirk PM. 2007. Fungal Families of the World. CAB International, Cambridge; Tedersoo L, et al. 2014. Science 346:1256688; David AS, et al. 2016. Microbial Ecology 71:912-926; Lawrey JD, Diederich P. 2016. URL: http://www.lichenicolous.net [24 May 2017]'
Zotu1298	d:Fungi(1.0000),p:Ascomycota(0.8300),c:Dothideomycetes(0.0500),o:Botryosphaeriales(0.0200),f:Planistromellaceae(0.0100),g:Kellermania(0.0100),s:Kellermania_agaves_SH204729.07FU(0.0100)	Kellermania	13	Pathotroph	Plant Pathogen	NULL	NULL	Probable	NULL	b'Tedersoo L, et al. 2014. Science 346:1256688'
Zotu1299	d:Fungi(1.0000),p:Basidiomycota(1.0000),c:Pucciniomycetes(0.9900),o:Septobasidiales(0.9900),f:Septobasidiaceae(0.9900),g:Septobasidium(0.8700),s:Septobasidium_bogoriense_SH029158.07FU(0.0900)	Septobasidium	13	Pathotroph	Animal Pathogen	Facultative Yeast	NULL	Probable	NULL	b'Tedersoo L, et al. 2014. Science 346:1256688'
Zotu13	d:Fungi(1.0000),p:Ascomycota(0.9300),c:Eurotiomycetes(0.9300),o:Eurotiales(0.9300),f:Aspergillaceae(0.9300),g:Aspergillus(0.9300),s:Aspergillus_fumigatus_SH007927.07FU(0.6000)	Aspergillus	13	Pathotroph-Saprotroph-Symbiotroph	Endophyte-Animal Pathogen-Plant Saprotroph-Soil Saprotroph-Undefined Saprotroph-Wood Saprotroph	Microfungus	NULL	Probable	NULL	b'Seehann G, et al. 1975. List of Fungi in Soft-Rot Tissue Tests. Institute fur Holzbiologie und Holzschutz, Bundesforschungsanstalt fur Forst - und Holzwirtshaft, Hamburg - Lohbrugge, Germany; Tedersoo L, et al. 2014. Science 346:1256688; Irinyi L, et al. 2015. Medical Mycology 53:313-337; Massimo NC, et al. 2015. Microbial Ecology 70:61-76; http://www.apsnet.org/publications/commonnames/Pages/d…
Zotu130	d:Fungi(1.0000),p:Ascomycota(1.0000),c:Dothideomycetes(1.0000),o:Capnodiales(0.9900),f:Mycosphaerellaceae(0.9600),g:Mycosphaerella(0.3400),s:Mycosphaerella_pruni-persicae_SH206806.07FU(0.2600)	Mycosphaerella	13	Pathotroph	Plant Pathogen	Microfungus	NULL	Probable	NULL	b'Tedersoo L, et al. 2014. Science 346:1256688'
Zotu1300	d:Fungi(1.0000),p:Ascomycota(1.0000),c:Leotiomycetes(1.0000),o:Helotiales(1.0000),f:Chaetomellaceae(1.0000),g:Pilidium(1.0000),s:Pilidium_pseudoconcavum_SH005197.07FU(0.6900)	Pilidium	13	Pathotroph	Plant Pathogen	NULL	NULL	Probable	NULL	b'Tedersoo L, et al. 2014. Science 346:1256688'
Zotu1301	d:Fungi(1.0000),p:Ascomycota(0.9900),c:Dothideomycetes(0.9900),o:Dothideales(0.7500),f:Dothioraceae(0.6400),g:Hormonema(0.6400),s:Hormonema_macrosporum_SH206392.07FU(0.6400)	Hormonema	13	Saprotroph	Undefined Saprotroph	Facultative Yeast	NULL	Probable	NULL	b'Tedersoo L, et al. 2014. Science 346:1256688'
Zotu1302	d:Fungi(1.0000),p:Basidiomycota(1.0000),c:Agaricomycetes(1.0000),o:Russulales(1.0000),f:Stereaceae(1.0000),g:Stereum(1.0000),s:Stereum_ostrea_SH196430.07FU(0.9900)	Stereum	13	Saprotroph	Undefined Saprotroph	NULL	White Rot	Probable	NULL	b'Tedersoo L, et al. 2014. Science 346:1256688'
Zotu1303	d:Fungi(1.0000),p:Ascomycota(1.0000),c:Sordariomycetes(1.0000),o:Sordariales(1.0000),f:Chaetomiaceae(1.0000),g:Chaetomium(0.4900)	-	-	-	-	-	-	-	Unassigned	-
Zotu1304	d:Fungi(1.0000),p:Ascomycota(1.0000),c:Dothideomycetes(1.0000),o:Pleosporales(1.0000),f:Teichosporaceae(0.3600),g:Curreya(0.2800),s:Teichospora_rubriostiolata_SH526882.07FU(0.0400)	Teichospora	13	Saprotroph	Undefined Saprotroph	NULL	NULL	Probable	NULL	b'Tedersoo L, et al. 2014. Science 346:1256688'
Zotu1305	d:Fungi(1.0000),p:Ascomycota(0.8400),c:Sordariomycetes(0.7100),o:Xylariales(0.1500),f:Xylariales_fam_Incertae_sedis(0.0700),g:Phialemoniopsis(0.0400),s:Phialemoniopsis_curvata_SH025276.07FU(0.0400)	-	-	-	-	-	-	-	Unassigned	-
Zotu1306	d:Fungi(1.0000),p:Ascomycota(0.9900),c:Dothideomycetes(0.8800),o:Myriangiales(0.8500),f:Elsinoaceae(0.7000),g:Sphaceloma(0.1100),s:Sphaceloma_tectificae_SH013191.07FU(0.0700)	Sphaceloma	13	Pathotroph	Plant Pathogen	NULL	NULL	Probable	NULL	b'Tedersoo L, et al. 2014. Science 346:1256688'
Zotu1307	d:Fungi(1.0000),p:Ascomycota(1.0000)	-	-	-	-	-	-	-	Unassigned	-
Zotu1308	d:Fungi(1.0000),p:Ascomycota(1.0000),c:Dothideomycetes(0.9900),o:Diaporthales(0.0100),f:Diaporthales_fam_Incertae_sedis(0.0100),g:Diatractium(0.0100)	-	-	-	-	-	-	-	Unassigned	-
Zotu1309	d:Fungi(1.0000),p:Ascomycota(0.6700),c:Dothideomycetes(0.6600),o:Pleosporales(0.6600),f:Phaeosphaeriaceae(0.4300),g:Septoriella(0.0400),s:Septoriella_phragmitis_SH238525.07FU(0.0400)	-	-	-	-	-	-	-	Unassigned	-
Zotu131	d:Fungi(1.0000),p:Basidiomycota(1.0000),c:Agaricostilbomycetes(1.0000),o:Agaricostilbales(1.0000),f:Kondoaceae(1.0000),g:Kondoa(1.0000)	-	-	-	-	-	-	-	Unassigned	-
Zotu1310	d:Fungi(1.0000),p:Basidiomycota(0.9100),c:Tremellomycetes(0.6600),o:Tremellales(0.6300),f:Bulleraceae(0.5400),g:Bullera(0.5300),s:Bullera_arundinariae_SH207554.07FU(0.5300)	Bullera	13	Symbiotroph	Epiphyte	Yeast	NULL	Highly Probable	Foliar, isolated from leaves of Melostomae candidum	b'Nakase T, et al. 2004. Systematic and Applied Microbiology 27:558-564'
Zotu1311	d:Fungi(1.0000),p:Ascomycota(1.0000),c:Dothideomycetes(0.0200),o:Pleosporales(0.0200),f:Pleosporales_fam_Incertae_sedis(0.0100),g:Leptosphaerulina(0.0100),s:Camarographium_koreanum_SH477608.07FU(0.0100)	-	-	-	-	-	-	-	Unassigned	-
Zotu1312	d:Fungi(1.0000),p:Basidiomycota(1.0000),c:Malasseziomycetes(1.0000),o:Malasseziales(1.0000),f:Malasseziaceae(1.0000),g:Malassezia(1.0000),s:Malassezia_globosa_SH184036.07FU(0.3700)	Malassezia	13	Pathotroph-Saprotroph	Animal Pathogen-Undefined Saprotroph	Facultative Yeast	NULL	Probable	A lipid-dependent fungus growing on the sebaceous areas of human skin that may cause or exacerbate several skin diseases (Pityrosporum is a synonym that has been used for the yeast forms)	b'Findley K, et al. 2013. Nature 498:367-370'
Zotu1313	d:Fungi(1.0000),p:Ascomycota(1.0000),c:Dothideomycetes(0.9600),o:Pleosporales(0.9200),f:Thyridariaceae(0.3000),g:Roussoella(0.3000),s:Roussoella_solani_SH180411.07FU(0.0300)	Roussoella	13	Saprotroph	Undefined Saprotroph	NULL	NULL	Probable	NULL	b'Tedersoo L, et al. 2014. Science 346:1256688'
Zotu1314	d:Fungi(1.0000),p:Ascomycota(1.0000)	-	-	-	-	-	-	-	Unassigned	-
Zotu1315	d:Fungi(1.0000),p:Ascomycota(1.0000),c:Sordariomycetes(1.0000),o:Hypocreales(1.0000),f:Cordycipitaceae(0.9900),g:Beauveria(0.8700),s:Beauveria_caledonica_SH212423.07FU(0.7900)	Beauveria	13	Pathotroph	Animal Pathogen	NULL	NULL	Probable	NULL	b'Tedersoo L, et al. 2014. Science 346:1256688'
Zotu1316	d:Fungi(1.0000)	-	-	-	-	-	-	-	Unassigned	-
Zotu1317	d:Fungi(1.0000),p:Ascomycota(0.8800),c:Saccharomycetes(0.8800),o:Saccharomycetales(0.8800),f:Saccharomycetales_fam_Incertae_sedis(0.8800),g:Candida(0.8800),s:Candida_metapsilosis_SH491539.07FU(0.7900)	Saccharomycetales	7	Saprotroph	Undefined Saprotroph	Yeast	NULL	Possible	NULL	b'Sterkenburg E, et al. 2015. New Phytologist 207:1145-1158'
Zotu1318	d:Fungi(1.0000),p:Ascomycota(1.0000),c:Saccharomycetes(1.0000),o:Saccharomycetales(0.3600),f:Saccharomycetaceae(0.3600),g:Saccharomyces(0.3600),s:Saccharomyces_mikatae_SH085061.07FU(0.2800)	Saccharomyces	13	Saprotroph	Undefined Saprotroph	Yeast	NULL	Probable	NULL	b'James TY, et al. 2006. Nature 443:818-822'
Zotu1319	d:Fungi(1.0000),p:Basidiomycota(1.0000),c:Agaricomycetes(1.0000),o:Russulales(0.9900),f:Peniophoraceae(0.9900),g:Peniophora(0.9900),s:Peniophora_pithya_SH188989.07FU(0.0100)	Peniophora	13	Pathotroph-Saprotroph	Plant Pathogen-Wood Saprotroph	Corticioid	White Rot	Probable	NULL	b'Tedersoo L, et al. 2014. Science 346:1256688'
Zotu132	d:Fungi(1.0000),p:Ascomycota(0.9900),c:Sordariomycetes(0.9900),o:Diaporthales(0.9900),f:Gnomoniaceae(0.9900),g:Pleuroceras(0.3700),s:Pleuroceras_tenellum_SH207390.07FU(0.3700)	Pleuroceras	13	Saprotroph	Undefined Saprotroph	NULL	NULL	Probable	NULL	b'Tedersoo L, et al. 2014. Science 346:1256688'
Zotu1320	d:Fungi(1.0000),p:Ascomycota(0.4800),c:Dothideomycetes(0.4800),o:Capnodiales(0.4800),f:Neodevriesiaceae(0.4200),g:Neodevriesia(0.4200),s:Neodevriesia_lagerstroemiae_SH009155.07FU(0.4200)	-	-	-	-	-	-	-	Unassigned	-
Zotu1321	d:Fungi(1.0000),p:Ascomycota(1.0000),c:Sordariomycetes(1.0000),o:Glomerellales(1.0000),f:Glomerellaceae(1.0000),g:Colletotrichum(1.0000),s:Colletotrichum_gloeosporioides_SH010223.07FU(0.3400)	Colletotrichum	13	Pathotroph-Symbiotroph	Endophyte-Plant Pathogen	Microfungus	NULL	Probable	NULL	b'Costa IPMW, et al. 2012. Mycotaxon 119:26; Tedersoo L, et al. 2014. Science 346:1256688; http://www.apsnet.org/publications/commonnames/Pages/default.aspx'
Zotu1322	d:Fungi(1.0000),p:Ascomycota(0.8100),c:Dothideomycetes(0.3100),o:Venturiales(0.1800),f:Venturiaceae(0.1400),g:Symbiotaphrina(0.1100),s:Symbiotaphrina_buchneri_SH643910.07FU(0.0800)	Symbiotaphrina	13	Symbiotroph	Animal Endosymbiont	NULL	NULL	Probable	NULL	b'Tedersoo L, et al. 2014. Science 346:1256688'
Zotu1323	d:Fungi(1.0000),p:Basidiomycota(1.0000),c:Agaricomycetes(1.0000),o:Hymenochaetales(1.0000),f:Hymenochaetales_fam_Incertae_sedis(1.0000),g:Resinicium(1.0000),s:Resinicium_friabile_SH204932.07FU(0.7600)	Resinicium	13	Saprotroph	Undefined Saprotroph	Corticioid	White Rot	Probable	NULL	b'Tedersoo L, et al. 2014. Science 346:1256688'
Zotu1324	d:Fungi(1.0000),p:Basidiomycota(1.0000),c:Agaricomycetes(1.0000),o:Polyporales(1.0000),f:Coriolaceae(1.0000),g:Wolfiporia(1.0000),s:Wolfiporia_dilatohypha_SH193358.07FU(1.0000)	Wolfiporia	13	Saprotroph	Wood Saprotroph	Corticioid	Brown Rot	Highly Probable	NULL	b'Gilbertson RL, Ryvarden L. 1987-1987. North American Polypores. Fungiflora, Oslo'
Zotu1325	d:Fungi(1.0000),p:Ascomycota(1.0000),c:Sordariomycetes(1.0000),o:Xylariales(1.0000),f:Amphisphaeriaceae(0.0100),g:Lepteutypa(0.0100),s:Lepteutypa_fuckelii_SH530116.07FU(0.0100)	Lepteutypa	13	Pathotroph	Plant Pathogen	NULL	NULL	Probable	NULL	b'http://www.apsnet.org/publications/commonnames/Pages/default.aspx'
Zotu1326	d:Fungi(1.0000),p:Basidiomycota(1.0000),c:Agaricomycetes(1.0000),o:Agaricales(1.0000),f:Strophariaceae(0.9200),g:Psilocybe(0.6700),s:Galerina_sideroides_SH176938.07FU(0.0100)	Galerina	13	Pathotroph-Saprotroph	Bryophyte Parasite-Leaf Saprotroph-Soil Saprotroph-Undefined Saprotroph-Wood Saprotroph	Agaricoid	White Rot	Probable	NULL	b'Tedersoo L, et al. 2014. Science 346:1256688'
Zotu1327	d:Fungi(1.0000),p:Ascomycota(0.7400),c:Dothideomycetes(0.4500),o:Pleosporales(0.3900),f:Massarinaceae(0.0700),g:Periconia(0.0600),s:Claussenomyces_olivaceus_SH642686.07FU(0.0400)	Claussenomyces	13	Saprotroph	Undefined Saprotroph	NULL	NULL	Probable	NULL	b'Esslinger TL. 2014. North Dakota State University (http://www.ndsu.edu/pubweb/~esslinge/chcklst/chcklst7.htm)'
Zotu1328	d:Fungi(1.0000),p:Ascomycota(0.9000),c:Leotiomycetes(0.8800),o:Helotiales(0.8700),f:Loramycetaceae(0.2200),g:Loramyces(0.2200),s:Loramyces_macrosporus_SH019792.07FU(0.2200)	Loramyces	13	Saprotroph	Undefined Saprotroph	NULL	NULL	Probable	NULL	b'Tedersoo L, et al. 2014. Science 346:1256688'
Zotu1329	d:Fungi(1.0000),p:Ascomycota(0.7300),c:Orbiliomycetes(0.5400),o:Orbiliales(0.5200),f:Orbiliaceae(0.5200),g:Orbilia(0.4100),s:Orbilia_vinosa_SH527918.07FU(0.0500)	Orbilia	13	Saprotroph	Wood Saprotroph	Microfungus	NULL	Probable	Saprobic, found especially on wood in both wet and dry habitats. Many species are nematophagous, forming adhesive knobs, nets or ring-like traps in the presence of a food source; perhaps a strategy for life in low-nitrogen environments. There have been reports of associations with algae for a few species, but an established lichen association appears not to exist (Cannon & Kirk 2007)	b'Cannon PF, Kirk PM. 2007. Fungal Families of the World. CAB International, Cambridge; Tedersoo L, et al. 2014. Science 346:1256688'
Zotu133	d:Fungi(1.0000),p:Ascomycota(0.9300),c:Dothideomycetes(0.9300),o:Pleosporales(0.9300)	-	-	-	-	-	-	-	Unassigned	-
Zotu1330	d:Fungi(1.0000),p:Basidiomycota(0.6200),c:Agaricomycetes(0.6200),o:Auriculariales(0.6200),f:Exidiaceae(0.4600),g:Exidia(0.2500),s:Exidia_recisa_SH194578.07FU(0.1600)	Exidia	13	Saprotroph-Symbiotroph	Endophyte-Undefined Saprotroph	Tremelloid	NULL	Probable	NULL	b'Tedersoo L, et al. 2014. Science 346:1256688 (doi:10.1126/science.1256688); David AS, et al. 2016. Microbial Ecology 71:912-926'
Zotu1331	d:Fungi(1.0000)	-	-	-	-	-	-	-	Unassigned	-
Zotu1332	d:Fungi(1.0000),p:Ascomycota(1.0000),c:Taphrinomycetes(1.0000),o:Taphrinales(1.0000),f:Taphrinaceae(1.0000),g:Taphrina(1.0000),s:Taphrina_caerulescens_SH026552.07FU(1.0000)	Taphrina	13	Pathotroph	Plant Pathogen	NULL	NULL	Probable	NULL	b'http://www.apsnet.org/publications/commonnames/Pages/default.aspx'
Zotu1333	d:Fungi(1.0000),p:Basidiomycota(1.0000),c:Agaricomycetes(1.0000),o:Trechisporales(1.0000),f:Hydnodontaceae(1.0000),g:Trechispora(1.0000),s:Trechispora_hymenocystis_SH199569.07FU(0.6700)	Trechispora	13	Saprotroph	Wood Saprotroph	Corticioid	White Rot	Highly Probable	NULL	b'Gilbertson RL, Ryvarden L. 1987-1987. North American Polypores. Fungiflora, Oslo; Rinaldi AC, et al. 2008. Fungal Diversity 33:1-45 Uncertain.; Tedersoo L, et al. 2010. Mycorrhiza 20:217-263 (not ECM).'
Zotu1334	d:Fungi(1.0000),p:Ascomycota(0.7000),c:Dothideomycetes(0.7000),o:Capnodiales(0.6500),f:Cladosporiaceae(0.6400),g:Toxicocladosporium(0.3900),s:Toxicocladosporium_rubrigenum_SH202299.07FU(0.3700)	Toxicocladosporium	13	Pathotroph-Symbiotroph	Endophyte-Plant Pathogen	Microfungus	NULL	Probable	Isolated from leaves of Posoqueria and Eucalyptus camaldulensis (occurring within a single small lesion) as well as moldy paint	b'Crous PW, et al. 2009. Persoonia 22:83-94'
Zotu1335	d:Fungi(1.0000),p:Basidiomycota(0.8900),c:Tremellomycetes(0.6700),o:Tremellales(0.6200),f:Bulleraceae(0.5300),g:Bullera(0.5200),s:Bullera_arundinariae_SH207554.07FU(0.5200)	Bullera	13	Symbiotroph	Epiphyte	Yeast	NULL	Highly Probable	Foliar, isolated from leaves of Melostomae candidum	b'Nakase T, et al. 2004. Systematic and Applied Microbiology 27:558-564'
Zotu1336	d:Fungi(1.0000),p:Basidiomycota(1.0000),c:Agaricomycetes(0.9900),o:Polyporales(0.9100),f:Polyporaceae(0.2400),g:Physisporinus(0.2400),s:Rigidoporus_sanguinolentus_SH189954.07FU(0.1200)	Rigidoporus	13	Saprotroph	Wood Saprotroph	Polyporoid	White Rot	Highly Probable	NULL	b'Gilbertson RL, Ryvarden L. 1987-1987. North American Polypores. Fungiflora, Oslo'
Zotu1337	d:Fungi(1.0000),p:Ascomycota(0.9300),c:Dothideomycetes(0.9300),o:Pleosporales(0.9300),f:Cucurbitariaceae(0.8800),g:Pyrenochaetopsis(0.8800),s:Pyrenochaetopsis_pratorum_SH198998.07FU(0.8100)	Pyrenochaetopsis	13	Pathotroph-Saprotroph-Symbiotroph	Endophyte-Lichen Parasite-Undefined Saprotroph	Microfungus	NULL	Possible	NULL	b'Tedersoo L, et al. 2014. Science 346:1256688; Massimo NC, et al. 2015. Microbial Ecology 70:61-76; Lawrey JD, Diederich P. 2016. URL: http://www.lichenicolous.net [24 May 2017]'
Zotu1338	d:Fungi(1.0000),p:Ascomycota(0.9900),c:Dothideomycetes(0.8400),o:Pleosporales(0.7600),f:Dictyosporiaceae(0.1500),g:Dictyosporium(0.1400),s:Dictyosporium_heptasporum_SH016883.07FU(0.1000)	Dictyosporium	13	Saprotroph	Undefined Saprotroph	Microfungus	NULL	Probable	NULL	b'Tedersoo L, et al. 2014. Science 346:1256688 (doi:10.1126/science.1256688)'
Zotu1339	d:Fungi(1.0000),p:Basidiomycota(1.0000),c:Agaricomycetes(1.0000),o:Agaricales(1.0000),f:Bolbitiaceae(1.0000),g:Conocybe(1.0000),s:Conocybe_crispa_SH179180.07FU(0.6600)	Conocybe	13	Saprotroph	Undefined Saprotroph	NULL	NULL	Probable	NULL	b'Tedersoo L, et al. 2014. Science 346:1256688'
Zotu134	d:Fungi(1.0000),p:Ascomycota(0.9800),c:Dothideomycetes(0.9800),o:Pleosporales(0.9800),f:Pleosporaceae(0.5100),g:Alternaria(0.5100),s:Didymella_glomerata_SH008134.07FU(0.0300)	Didymella	13	Pathotroph-Saprotroph	Animal Pathogen-Plant Pathogen-Undefined Saprotroph	Microfungus	NULL	Probable	NULL	b'Tedersoo L, et al. 2014. Science 346:1256688 (doi:10.1126/science.1256688)'
Zotu1340	d:Fungi(1.0000),p:Ascomycota(1.0000),c:Dothideomycetes(0.9700),o:Pleosporales(0.9600),f:Lentitheciaceae(0.7900),g:Keissleriella(0.7900),s:Keissleriella_culmifida_SH207044.07FU(0.6300)	Keissleriella	13	Saprotroph	Undefined Saprotroph	NULL	NULL	Probable	NULL	b'Tedersoo L, et al. 2014. Science 346:1256688'
Zotu1341	d:Fungi(1.0000)	-	-	-	-	-	-	-	Unassigned	-
Zotu1342	d:Fungi(1.0000),p:Ascomycota(0.8400),c:Dothideomycetes(0.8400),o:Pleosporales(0.8400),f:Pleosporaceae(0.8400),g:Alternaria(0.2100),s:Alternaria_cinerariae_SH216796.07FU(0.2100)	Alternaria	13	Pathotroph-Saprotroph-Symbiotroph	Animal Pathogen-Endophyte-Plant Pathogen-Wood Saprotroph	Microfungus	Soft Rot	Possible	NULL	b'Duncan CG, Eslyn WE. 1966. Mycologia 58:642-664; Seehann G, et al. 1975. List of Fungi in Soft-Rot Tissue Tests. Institute fur Holzbiologie und Holzschutz, Bundesforschungsanstalt fur Forst - und Holzwirtshaft, Hamburg - Lohbrugge, Germany; Tedersoo L, et al. 2014. Science 346:125688'
Zotu1343	d:Fungi(1.0000),p:Ascomycota(1.0000),c:Dothideomycetes(1.0000),o:Capnodiales(1.0000),f:Mycosphaerellaceae(1.0000),g:Zymoseptoria(0.8900),s:Zymoseptoria_halophila_SH195828.07FU(0.8800)	-	-	-	-	-	-	-	Unassigned	-
Zotu1344	d:Fungi(1.0000),p:Ascomycota(1.0000),c:Sordariomycetes(0.9600),o:Glomerellales(0.9600),f:Glomerellaceae(0.9600),g:Colletotrichum(0.8600),s:Colletotrichum_endophytum_SH195677.07FU(0.2900)	Colletotrichum	13	Pathotroph-Symbiotroph	Endophyte-Plant Pathogen	Microfungus	NULL	Probable	NULL	b'Costa IPMW, et al. 2012. Mycotaxon 119:26; Tedersoo L, et al. 2014. Science 346:1256688; http://www.apsnet.org/publications/commonnames/Pages/default.aspx'
Zotu1345	d:Fungi(1.0000),p:Ascomycota(0.9600),c:Dothideomycetes(0.7800),o:Pleosporales(0.7600),f:Massarinaceae(0.2300),g:Massarina(0.2300),s:Lophiostoma_corticola_SH492296.07FU(0.0500)	Lophiostoma	13	Saprotroph	Undefined Saprotroph	NULL	NULL	Probable	NULL	b'Tedersoo L, et al. 2014. Science 346:1256688'
Zotu1346	d:Fungi(1.0000),p:Basidiomycota(1.0000),c:Agaricomycetes(1.0000),o:Polyporales(1.0000),f:Irpicaceae(1.0000),g:Irpex(0.9900),s:Irpex_lacteus_SH497100.07FU(0.9800)	Irpex	13	Saprotroph	Wood Saprotroph	Corticioid	White Rot	Highly Probable	White rot of dead hardwoods, rarely on conifers	b'Costa IPMW, et al. 2012. Mycotaxon 119:26; Gilbertson RL, Ryvarden L. 1987-1987. North American Polypores. Fungiflora, Oslo; http://www.apsnet.org/publications/commonnames/Pages/default.aspx'
Zotu1347	d:Fungi(1.0000),p:Ascomycota(0.8900),c:Dothideomycetes(0.0600),o:Myriangiales(0.0200),f:Mycosphaerellaceae(0.0100),g:Botryosphaeria(0.0100),s:Botryosphaeria_quercuum_SH192905.07FU(0.0100)	Botryosphaeria	13	Pathotroph-Symbiotroph	Endophyte-Plant Pathogen	Microfungus	NULL	Probable	NULL	b'Tedersoo L, et al. 2014. Science 346:1256688; Christian N, et al. 2016. Microbial Ecology 72:621-632; http://www.apsnet.org/publications/commonnames/Pages/default.aspx'
Zotu1348	d:Fungi(1.0000),p:Ascomycota(0.9900),c:Sordariomycetes(0.8000),o:Chaetosphaeriales(0.7000),f:Chaetosphaeriaceae(0.6600),g:Pseudolachnella(0.2600),s:Neopseudolachnella_acutispora_SH531626.07FU(0.1600)	-	-	-	-	-	-	-	Unassigned	-
Zotu1349	d:Fungi(1.0000),p:Ascomycota(0.9400),c:Sordariomycetes(0.9300),o:Xylariales(0.8900),f:Amphisphaeriaceae(0.6600),g:Lepteutypa(0.6400),s:Lepteutypa_fuckelii_SH530116.07FU(0.5000)	Lepteutypa	13	Pathotroph	Plant Pathogen	NULL	NULL	Probable	NULL	b'http://www.apsnet.org/publications/commonnames/Pages/default.aspx'
Zotu135	d:Fungi(1.0000),p:Ascomycota(1.0000),c:Leotiomycetes(0.4800),o:Helotiales(0.4700),f:Helotiaceae(0.4700),g:Articulospora(0.4700)	-	-	-	-	-	-	-	Unassigned	-
Zotu1350	d:Fungi(1.0000),p:Ascomycota(0.8800),c:Leotiomycetes(0.5800),o:Helotiales(0.5800),f:Helotiales_fam_Incertae_sedis(0.4300),g:Rhexocercosporidium(0.4000),s:Rhexocercosporidium_panacis_SH186775.07FU(0.4000)	Rhexocercosporidium	13	Pathotroph	Plant Pathogen	NULL	NULL	Probable	NULL	b'Tedersoo L, et al. 2014. Science 346:1256688'
Zotu1351	d:Fungi(1.0000),p:Ascomycota(1.0000),c:Dothideomycetes(1.0000),o:Capnodiales(1.0000),f:Neodevriesiaceae(1.0000),g:Neodevriesia(1.0000),s:Neodevriesia_capensis_SH188194.07FU(0.9800)	-	-	-	-	-	-	-	Unassigned	-
Zotu1352	d:Fungi(1.0000),p:Ascomycota(1.0000),c:Dothideomycetes(1.0000),o:Capnodiales(1.0000),f:Teratosphaeriaceae(1.0000),g:Catenulostroma(0.9600),s:Catenulostroma_hermanusense_SH214166.07FU(0.9600)	Catenulostroma	13	Pathotroph	Plant Pathogen	NULL	NULL	Probable	NULL	b'Tedersoo L, et al. 2014. Science 346:1256688'
Zotu1353	d:Fungi(1.0000),p:Basidiomycota(1.0000),c:Agaricomycetes(1.0000),o:Agaricales(1.0000),f:Tricholomataceae(1.0000),g:Resupinatus(0.9900),s:Resupinatus_alboniger_SH526692.07FU(0.9900)	Resupinatus	13	Saprotroph	Undefined Saprotroph	Corticioid	White Rot	Probable	NULL	b'Tedersoo L, et al. 2014. Science 346:1256688'
Zotu1354	d:Fungi(1.0000),p:Ascomycota(1.0000),c:Sordariomycetes(1.0000),o:Xylariales(0.9900),f:Xylariaceae(0.9800),g:Hypoxylon(0.9700),s:Hypoxylon_howeanum_SH196295.07FU(0.5700)	Hypoxylon	13	Saprotroph	Undefined Saprotroph	NULL	NULL	Probable	NULL	b'Tedersoo L, et al. 2014. Science 346:1256688'
Zotu1355	d:Fungi(1.0000),p:Basidiomycota(0.9100),c:Cystobasidiomycetes(0.6300),o:Cystobasidiales(0.2400),f:Cystobasidiomycetes_fam_Incertae_sedis(0.2100),g:Sporobolomyces(0.1800),s:Sporobolomyces_symmetricus_SH205939.07FU(0.1800)	Sporobolomyces	13	Pathotroph-Saprotroph	Fungal Parasite-Litter Saprotroph	Yeast	NULL	Probable	NULL	b'Tedersoo L, et al. 2014. Science 346:1256688; Nagy GL, et al. 2014. Nature Communications 5:4471; Purahong W, et al. 2016. Molecular Ecology 25:4059-4074'
Zotu1356	d:Fungi(1.0000),p:Ascomycota(1.0000),c:Dothideomycetes(1.0000),o:Myriangiales(1.0000),f:Myriangiaceae(0.9900),g:Myriangium(0.4000)	-	-	-	-	-	-	-	Unassigned	-
Zotu1357	d:Fungi(1.0000),p:Basidiomycota(1.0000),c:Agaricomycetes(1.0000),o:Russulales(1.0000),f:Russulaceae(1.0000),g:Russula(1.0000),s:Russula_atropurpurea_SH186212.07FU(0.0100)	Russula	13	Symbiotroph	Ectomycorrhizal	Agaricoid	NULL	Highly Probable	NULL	b'Rinaldi AC, et al. 2008. Fungal Diversity 33:1-45; Tedersoo L, et al. 2010. Mycorrhiza 20:217-263; http://mycorrhizas.info/ecmf.html'
Zotu1358	d:Fungi(1.0000),p:Ascomycota(0.9700),c:Leotiomycetes(0.9700),o:Helotiales(0.4800),f:Helotiales_fam_Incertae_sedis(0.3200),g:Phialocephala(0.3200),s:Vibrissea_truncorum_SH212366.07FU(0.0700)	Vibrissea	13	Saprotroph	Undefined Saprotroph	NULL	NULL	Probable	NULL	b'Tedersoo L, et al. 2014. Science 346:1256688 (doi:10.1126/science.1256688)'
Zotu1359	d:Fungi(1.0000),p:Basidiomycota(0.9800),c:Tremellomycetes(0.9800),o:Tremellales(0.9800),f:Bulleribasidiaceae(0.9100),g:Dioszegia(0.9100),s:Dioszegia_xingshanensis_SH024110.07FU(0.7200)	Dioszegia	13	Saprotroph	Undefined Saprotroph	Yeast	NULL	Probable	The Dioszegia subclade sensu Inacio (Inacio et al. 20015) is characterized by orange-yellow or orange to deep orange colonies. Isolated from plant leaves and soil.	b'Takashima M, et al. 2011 International Journal of Systematic and Evolutionary Microbiology 61:1736-1739'
Zotu136	d:Fungi(1.0000),p:Ascomycota(1.0000),c:Sordariomycetes(0.4300),o:Glomerellales(0.4300),f:Glomerellaceae(0.4300),g:Colletotrichum(0.3800),s:Colletotrichum_gloeosporioides_SH001256.07FU(0.1000)	Colletotrichum	13	Pathotroph-Symbiotroph	Endophyte-Plant Pathogen	Microfungus	NULL	Probable	NULL	b'Costa IPMW, et al. 2012. Mycotaxon 119:26; Tedersoo L, et al. 2014. Science 346:1256688; http://www.apsnet.org/publications/commonnames/Pages/default.aspx'
Zotu1360	d:Fungi(1.0000),p:Ascomycota(0.9100),c:Sordariomycetes(0.8900),o:Xylariales(0.8100),f:Amphisphaeriaceae(0.1600),g:Subramaniomyces(0.1100),s:Tristratiperidium_microsporum_SH530180.07FU(0.0600)	-	-	-	-	-	-	-	Unassigned	-
Zotu1361	d:Fungi(1.0000),p:Ascomycota(0.9100),c:Dothideomycetes(0.5000),o:Venturiales(0.2300),f:Venturiaceae(0.1000),g:Symbiotaphrina(0.0700),s:Symbiotaphrina_buchneri_SH643910.07FU(0.0600)	Symbiotaphrina	13	Symbiotroph	Animal Endosymbiont	NULL	NULL	Probable	NULL	b'Tedersoo L, et al. 2014. Science 346:1256688'
Zotu1362	d:Fungi(1.0000),p:Ascomycota(1.0000),c:Leotiomycetes(1.0000),o:Helotiales(1.0000),f:Hyaloscyphaceae(0.9700),g:Lachnum(0.5500),s:Lachnum_virgineum_SH201666.07FU(0.0200)	Lachnum	13	Saprotroph	Undefined Saprotroph	Microfungus	NULL	Probable	NULL	b'Tedersoo L, et al. 2014. Science 346:1256688'
Zotu1363	d:Fungi(1.0000),p:Ascomycota(1.0000),c:Sordariomycetes(1.0000),o:Hypocreales(1.0000)	-	-	-	-	-	-	-	Unassigned	-
Zotu1364	d:Fungi(1.0000),p:Ascomycota(0.9100),c:Dothideomycetes(0.6700),o:Myriangiales(0.6000),f:Myriangiales_fam_Incertae_sedis(0.1800),g:Endosporium(0.1800)	-	-	-	-	-	-	-	Unassigned	-
Zotu1365	d:Fungi(1.0000),p:Ascomycota(0.5000),c:Dothideomycetes(0.1700),o:Capnodiales(0.0800),f:Mycosphaerellaceae(0.0400),g:Valsaria(0.0400),s:Valsaria_lopadostomoides_SH521453.07FU(0.0400)	Valsaria	13	Saprotroph	Wood Saprotroph	Microfungus	NULL	Highly Probable	Generally occur in little to moderately decayed bark (Jaklitsch et al. 2015)	b'Jaklitsch WM, et al. 2015. Fungal Diversity 73:159-202'
Zotu1366	d:Fungi(1.0000),p:Ascomycota(1.0000),c:Sordariomycetes(1.0000),o:Xylariales(1.0000),f:Xylariaceae(1.0000),g:Lopadostoma(0.3200),s:Lopadostoma_pouzarii_SH204010.07FU(0.3200)	Lopadostoma	13	Saprotroph	Undefined Saprotroph	NULL	NULL	Probable	NULL	b'Tedersoo L, et al. 2014. Science 346:1256688'
Zotu1367	d:Fungi(1.0000),p:Basidiomycota(1.0000),c:Agaricomycetes(1.0000)	-	-	-	-	-	-	-	Unassigned	-
Zotu1368	d:Fungi(1.0000),p:Ascomycota(0.9500),c:Dothideomycetes(0.9500),o:Capnodiales(0.9500),f:Mycosphaerellaceae(0.9500),g:Ramularia(0.7000),s:Ramularia_rumicis-crispi_SH026489.07FU(0.7000)	Ramularia	13	Pathotroph	Plant Pathogen	Microfungus	NULL	Probable	NULL	b'Tedersoo L, et al. 2014. Science 346:1256688'
Zotu1369	d:Fungi(1.0000),p:Basidiomycota(1.0000),c:Agaricomycetes(1.0000),o:Agaricales(1.0000),f:Entolomataceae(1.0000),g:Clitopilus(1.0000),s:Clitopilus_prunulus_SH190263.07FU(0.3800)	Clitopilus	13	Saprotroph	Undefined Saprotroph	Agaricoid	NULL	Probable	NULL	b'Tedersoo L, et al. 2014. Science 346:1256688'
Zotu137	d:Fungi(1.0000),p:Ascomycota(1.0000),c:Dothideomycetes(1.0000),o:Pleosporales(1.0000),f:Phaeosphaeriaceae(0.0100)	-	-	-	-	-	-	-	Unassigned	-
Zotu1370	d:Fungi(1.0000),p:Ascomycota(1.0000),c:Dothideomycetes(0.9900),o:Pleosporales(0.9800),f:Phaeosphaeriaceae(0.9800),g:Muriphaeosphaeria(0.9800)	-	-	-	-	-	-	-	Unassigned	-
Zotu1371	d:Fungi(1.0000),p:Ascomycota(0.8500),c:Dothideomycetes(0.8100),o:Capnodiales(0.7900),f:Teratosphaeriaceae(0.3600),g:Capnobotryella(0.3600),s:Pseudoramichloridium_brasilianum_SH192631.07FU(0.0700)	-	-	-	-	-	-	-	Unassigned	-
Zotu1372	d:Fungi(1.0000),p:Basidiomycota(1.0000),c:Tremellomycetes(1.0000),o:Filobasidiales(1.0000),f:Filobasidiaceae(1.0000),g:Filobasidium(1.0000),s:Filobasidium_wieringae_SH221435.07FU(1.0000)	Filobasidium	13	Saprotroph	Undefined Saprotroph	Facultative Yeast	NULL	Highly Probable	NULL	b'Kurtzman CP, et al. (eds.) 2011. The Yeasts, a Taxonomic Study. Fifth Edition. Vols 1-3. Elsevier, San Diego'
Zotu1373	d:Fungi(1.0000),p:Ascomycota(0.9200),c:Dothideomycetes(0.7600),o:Myriangiales(0.7000),f:Elsinoaceae(0.5100),g:Sphaceloma(0.0800),s:Symbiotaphrina_buchneri_SH643910.07FU(0.0600)	Symbiotaphrina	13	Symbiotroph	Animal Endosymbiont	NULL	NULL	Probable	NULL	b'Tedersoo L, et al. 2014. Science 346:1256688'
Zotu1374	d:Fungi(1.0000),p:Ascomycota(0.9500),c:Dothideomycetes(0.7700),o:Pleosporales(0.7700),f:Periconiaceae(0.5400),g:Periconia(0.5400),s:Periconia_macrospinosa_SH204052.07FU(0.3000)	Periconia	13	Pathotroph-Saprotroph-Symbiotroph	Endophyte-Plant Pathogen-Wood Saprotroph	Microfungus	Soft Rot	Possible	Dark Septate Endophyte, known from plant roots (Mandyam et al. 2010); Endophyte Host - Asteraceae, Musaceae (Costa et al. 2012)	b'Duncan CG, Eslyn WE. 1966. Mycologia 58:642-645; Costa IPMW, et al. 2012. Mycotaxon 119:26; Mandyam K, et al. 2012. Mycorrhiza 22:109-119; Knapp DG, et al. 2012. PLOS ONE 7:e32570; http://www.apsnet.org/publications/commonnames/Pages/default.aspx'
Zotu1375	d:Fungi(1.0000),p:Ascomycota(0.9900),c:Sordariomycetes(0.8400),o:Xylariales(0.8400),f:Xylariaceae(0.5100),g:Hypoxylon(0.4000),s:Hypoxylon_notatum_SH199316.07FU(0.1000)	Hypoxylon	13	Saprotroph	Undefined Saprotroph	NULL	NULL	Probable	NULL	b'Tedersoo L, et al. 2014. Science 346:1256688'
Zotu1376	d:Fungi(1.0000),p:Basidiomycota(1.0000),c:Agaricomycetes(1.0000),o:Cantharellales(1.0000),f:Botryobasidiaceae(1.0000),g:Botryobasidium(1.0000),s:Botryobasidium_candicans_SH190258.07FU(0.8700)	Botryobasidium	13	Saprotroph	Undefined Saprotroph	Corticioid	White Rot	Probable	NULL	b'Tedersoo L, et al. 2014. Science 346:1256688'
Zotu1377	d:Fungi(1.0000),p:Basidiomycota(0.9900),c:Agaricomycetes(0.9500),o:Polyporales(0.8300),f:Hyphodermataceae(0.8300),g:Hyphoderma(0.8300),s:Hyphoderma_litschaueri_SH464557.07FU(0.7000)	Hyphoderma	13	Saprotroph	Undefined Saprotroph	Corticioid	White Rot	Probable	NULL	b'Tedersoo L, et al. 2014. Science 346:1256688'
Zotu1378	d:Fungi(1.0000),p:Ascomycota(0.1100),c:Dothideomycetes(0.1100),o:Capnodiales(0.0800),f:Teratosphaeriaceae(0.0100)	-	-	-	-	-	-	-	Unassigned	-
Zotu1379	d:Fungi(1.0000),p:Basidiomycota(1.0000),c:Agaricomycetes(1.0000),o:Phallales(1.0000),f:Phallaceae(1.0000),g:Phallus(1.0000),s:Phallus_rugulosus_SH220939.07FU(1.0000)	Phallus	13	Saprotroph	Litter Saprotroph-Soil Saprotroph-Wood Saprotroph	Phalloid	NULL	Probable	Common name - stinkhorn; Saprobic, on soil or decaying wood, with spores dispersed by insects that are attracted to the fruit bodies by their distictive foetid smell (Cannon & Kirk 2007)	b'Grgurinovic CA, Simpson JA. 2001. Fungal Diversity 8:97-127; Cannon PF, Kirk PM. 2007. Fungal Families of the World. CAB International, Cambridge; Tedersoo L, et al. 2014. Science 346:1256688'
Zotu138	d:Fungi(1.0000),p:Basidiomycota(1.0000),c:Tremellomycetes(1.0000),o:Tremellales(0.7600),f:Bulleribasidiaceae(0.7600),g:Hannaella(0.7300),s:Hannaella_oryzae_SH219460.07FU(0.3600)	-	-	-	-	-	-	-	Unassigned	-
Zotu1380	d:Fungi(1.0000),p:Ascomycota(0.4900),c:Dothideomycetes(0.4800),o:Pleosporales(0.4800),f:Pleosporaceae(0.4800),g:Alternaria(0.3900),s:Alternaria_oregonensis_SH628739.07FU(0.1900)	Alternaria	13	Pathotroph-Saprotroph-Symbiotroph	Animal Pathogen-Endophyte-Plant Pathogen-Wood Saprotroph	Microfungus	Soft Rot	Possible	NULL	b'Duncan CG, Eslyn WE. 1966. Mycologia 58:642-664; Seehann G, et al. 1975. List of Fungi in Soft-Rot Tissue Tests. Institute fur Holzbiologie und Holzschutz, Bundesforschungsanstalt fur Forst - und Holzwirtshaft, Hamburg - Lohbrugge, Germany; Tedersoo L, et al. 2014. Science 346:125688'
Zotu1381	d:Fungi(1.0000),p:Ascomycota(0.9900),c:Sordariomycetes(0.9800),o:Xylariales(0.0600),f:Xylariaceae(0.0600),g:Poronia(0.0200),s:Poronia_australiensis_SH488830.07FU(0.0200)	Poronia	13	Saprotroph	Undefined Saprotroph	NULL	NULL	Probable	NULL	b'Tedersoo L, et al. 2014. Science 346:1256688'
Zotu1382	d:Fungi(1.0000),p:Basidiomycota(1.0000),c:Agaricomycetes(1.0000),o:Russulales(1.0000),f:Russulaceae(1.0000),g:Russula(1.0000)	-	-	-	-	-	-	-	Unassigned	-
Zotu1383	d:Fungi(1.0000),p:Basidiomycota(1.0000),c:Agaricomycetes(1.0000),o:Agaricales(1.0000),f:Bolbitiaceae(1.0000),g:Conocybe(1.0000),s:Conocybe_crispa_SH179180.07FU(0.6600)	Conocybe	13	Saprotroph	Undefined Saprotroph	NULL	NULL	Probable	NULL	b'Tedersoo L, et al. 2014. Science 346:1256688'
Zotu1384	d:Fungi(1.0000),p:Ascomycota(1.0000),c:Sordariomycetes(1.0000),o:Magnaporthales(0.9900),f:Magnaporthaceae(0.9900),g:Mycoleptodiscus(0.9900)	-	-	-	-	-	-	-	Unassigned	-
Zotu1385	d:Fungi(1.0000),p:Ascomycota(1.0000),c:Leotiomycetes(1.0000),o:Helotiales(1.0000),f:Hyaloscyphaceae(0.9600),g:Lachnum(0.8100),s:Lachnum_nudipes_SH018517.07FU(0.0700)	Lachnum	13	Saprotroph	Undefined Saprotroph	Microfungus	NULL	Probable	NULL	b'Tedersoo L, et al. 2014. Science 346:1256688'
Zotu1386	d:Fungi(1.0000),p:Ascomycota(0.1900),c:Dothideomycetes(0.1900),o:Capnodiales(0.1900),f:Dissoconiaceae(0.1900),g:Ramichloridium(0.1800),s:Ramichloridium_punctatum_SH190786.07FU(0.0700)	Ramichloridium	13	Pathotroph	Plant Pathogen	NULL	NULL	Probable	NULL	b'Tedersoo L, et al. 2014. Science 346:1256688'
Zotu1387	d:Fungi(1.0000),p:Ascomycota(1.0000),c:Sordariomycetes(1.0000),o:Xylariales(1.0000),f:Xylariaceae(1.0000),g:Xylaria(1.0000)	-	-	-	-	-	-	-	Unassigned	-
Zotu1388	d:Fungi(1.0000),p:Basidiomycota(1.0000),c:Agaricomycetes(1.0000),o:Polyporales(1.0000),f:Polyporaceae(1.0000),g:Skeletocutis(1.0000),s:Skeletocutis_nivea_SH192219.07FU(0.9800)	Skeletocutis	13	Saprotroph	Wood Saprotroph	Polyporoid	White Rot	Highly Probable	NULL	b'Gilbertson RL, Ryvarden L. 1987-1987. North American Polypores. Fungiflora, Oslo'
Zotu1389	d:Fungi(1.0000),p:Ascomycota(0.9700),c:Dothideomycetes(0.9500),o:Pleosporales(0.9400),f:Sulcatisporaceae(0.9000),g:Sulcatispora(0.9000),s:Sulcatispora_acerina_SH496356.07FU(0.8500)	-	-	-	-	-	-	-	Unassigned	-
Zotu139	d:Fungi(1.0000),p:Ascomycota(1.0000),c:Dothideomycetes(1.0000),o:Pleosporales(1.0000),f:Sporormiaceae(0.9700),g:Preussia(0.9000),s:Preussia_persica_SH184177.07FU(0.1600)	Preussia	13	Saprotroph	Undefined Saprotroph	NULL	NULL	Probable	NULL	b'Tedersoo L, et al. 2014. Science 346:1256688'
Zotu1390	d:Fungi(1.0000),p:Basidiomycota(1.0000),c:Tremellomycetes(1.0000),o:Filobasidiales(1.0000)	-	-	-	-	-	-	-	Unassigned	-
Zotu1391	d:Fungi(1.0000),p:Ascomycota(0.3000),c:Sordariomycetes(0.2900),o:Erysiphales(0.0100),f:Erysiphaceae(0.0100),g:Phyllactinia(0.0100),s:Phyllactinia_juglandis_SH202236.07FU(0.0100)	Phyllactinia	13	Pathotroph	Plant Pathogen	Microfungus	NULL	Probable	NULL	b'Tedersoo L, et al. 2014. Science 346:1256688'
Zotu1392	d:Fungi(1.0000),p:Basidiomycota(1.0000),c:Agaricomycetes(1.0000),o:Agaricales(1.0000),f:Psathyrellaceae(1.0000),g:Coprinellus(0.8900),s:Coprinellus_heterosetulosus_SH220392.07FU(0.3400)	Coprinellus	13	Saprotroph	Undefined Saprotroph	NULL	NULL	Probable	NULL	b'Tedersoo L, et al. 2014. Science 346:1256688'
Zotu1393	d:Fungi(1.0000),p:Basidiomycota(1.0000),c:Agaricomycetes(1.0000),o:Polyporales(1.0000),f:Polyporaceae(1.0000),g:Trichaptum(1.0000),s:Trichaptum_biforme_SH178781.07FU(1.0000)	Trichaptum	13	Saprotroph	Wood Saprotroph	Polyporoid	White Rot	Highly Probable	NULL	b'Gilbertson RL, Ryvarden L. 1987-1987. North American Polypores. Fungiflora, Oslo'
Zotu1394	d:Fungi(1.0000),p:Ascomycota(0.9000),c:Dothideomycetes(0.5200),o:Pleosporales(0.4200),f:Massarinaceae(0.0900),g:Phaeosphaeria(0.0700),s:Phaeosphaeria_rousseliana_SH630633.07FU(0.0700)	Phaeosphaeria	13	Saprotroph	Undefined Saprotroph	NULL	NULL	Probable	NULL	b'Tedersoo L, et al. 2014. Science 346:1256688'
Zotu1395	d:Fungi(1.0000),p:Basidiomycota(1.0000),c:Agaricomycetes(1.0000),o:Agaricales(1.0000),f:Tricholomataceae(1.0000),g:Tricholoma(1.0000)	-	-	-	-	-	-	-	Unassigned	-
Zotu1396	d:Fungi(1.0000),p:Basidiomycota(1.0000),c:Exobasidiomycetes(1.0000),o:Exobasidiales(1.0000)	-	-	-	-	-	-	-	Unassigned	-
Zotu1397	d:Fungi(1.0000),p:Ascomycota(0.9900),c:Dothideomycetes(0.9900),o:Pleosporales(0.2300),f:Lophiostomataceae(0.2300),g:Biappendiculispora(0.1200),s:Biappendiculispora_japonica_SH532144.07FU(0.1200)	Biappendiculispora	13	Saprotroph	Plant Saprotroph	Microfungus	NULL	Highly Probable	Isolated from dead herbaceous stems or culms of Poaceae (Thambugala et al. 2015)	b'Thambugala KM, et al. 2015. Fungal Diversity 74:199-266'
Zotu1398	d:Fungi(1.0000),p:Ascomycota(1.0000),c:Leotiomycetes(0.9700),o:Helotiales(0.3100),f:Helotiaceae(0.1600),g:Articulospora(0.1600),s:Calloria_urticae_SH529064.07FU(0.1300)	-	-	-	-	-	-	-	Unassigned	-
Zotu1399	d:Fungi(1.0000),p:Ascomycota(1.0000),c:Sordariomycetes(1.0000),o:Glomerellales(1.0000),f:Glomerellaceae(1.0000),g:Colletotrichum(0.8500),s:Colletotrichum_lupini_SH408620.07FU(0.3500)	Colletotrichum	13	Pathotroph-Symbiotroph	Endophyte-Plant Pathogen	Microfungus	NULL	Probable	NULL	b'Costa IPMW, et al. 2012. Mycotaxon 119:26; Tedersoo L, et al. 2014. Science 346:1256688; http://www.apsnet.org/publications/commonnames/Pages/default.aspx'
Zotu14	d:Fungi(1.0000),p:Ascomycota(1.0000),c:Dothideomycetes(0.9900),o:Pleosporales(0.9800),f:Cucurbitariaceae(0.4700),g:Pyrenochaetopsis(0.4500),s:Pyrenochaetopsis_leptospora_SH198996.07FU(0.4500)	Pyrenochaetopsis	13	Pathotroph-Saprotroph-Symbiotroph	Endophyte-Lichen Parasite-Undefined Saprotroph	Microfungus	NULL	Possible	NULL	b'Tedersoo L, et al. 2014. Science 346:1256688; Massimo NC, et al. 2015. Microbial Ecology 70:61-76; Lawrey JD, Diederich P. 2016. URL: http://www.lichenicolous.net [24 May 2017]'
Zotu140	d:Fungi(1.0000),p:Ascomycota(0.0200),c:Dothideomycetes(0.0200),o:Dothideales(0.0200),f:Aureobasidiaceae(0.0200),g:Aureobasidium(0.0200),s:Aureobasidium_pullulans_SH195776.07FU(0.0200)	Aureobasidium	13	Pathotroph-Saprotroph-Symbiotroph	Animal Pathogen-Endophyte-Epiphyte-Plant Pathogen-Undefined Saprotroph	Facultative Yeast	NULL	Possible	NULL	b'Costa IPMW, et al. 2012. Mycotaxon 119:26; Tedersoo L, et al. 2014. Science 346:1256688; Wachowska U, Glowacka K. 2014. Biocontrol 59:pp 635-645; Irinyia L, Lacknerb M, de Hoog GS, Meyer W. 2016. Fungal Biology 120:125-136; http://www.apsnet.org/publications/commonnames/Pages/default.aspx'
Zotu1400	d:Fungi(1.0000),p:Basidiomycota(1.0000),c:Agaricomycetes(1.0000),o:Hymenochaetales(1.0000),f:Hymenochaetaceae(1.0000)	-	-	-	-	-	-	-	Unassigned	-
Zotu1401	d:Fungi(1.0000),p:Ascomycota(1.0000),c:Dothideomycetes(0.9900),o:Pleosporales(0.7100),f:Lophiostomataceae(0.6600),g:Lophiostoma(0.6300),s:Lophiostoma_macrostomoides_SH004352.07FU(0.1200)	Lophiostoma	13	Saprotroph	Undefined Saprotroph	NULL	NULL	Probable	NULL	b'Tedersoo L, et al. 2014. Science 346:1256688'
Zotu1402	d:Fungi(1.0000),p:Ascomycota(1.0000),c:Sordariomycetes(0.9900),o:Xylariales(0.9900),f:Xylariaceae(0.9900),g:Nemania(0.5000),s:Phyllosticta_cruenta_SH198939.07FU(0.0100)	Phyllosticta	13	Pathotroph-Saprotroph-Symbiotroph	Endophyte-Plant Pathogen-Wood Saprotroph	Microfungus	Soft Rot	Highly Probable	NULL	b'Seehann G, et al. 1975. List of Fungi in Soft-Rot Tissue Tests. Institute fur Holzbiologie und Holzschutz, Bundesforschungsanstalt fur Forst - und Holzwirtshaft, Hamburg - Lohbrugge, Germany; Tedersoo L, et al. 2014. Science 346:1256688; Christian N, et al. 2016. Microbial Ecology 72:621-632'
Zotu1403	d:Fungi(1.0000)	-	-	-	-	-	-	-	Unassigned	-
Zotu1404	d:Fungi(1.0000),p:Basidiomycota(0.5900),c:Cystobasidiomycetes(0.3000),o:Sporidiobolales(0.2500),f:Sporidiobolaceae(0.1000),g:Buckleyzyma(0.0800),s:Sporobolomyces_symmetricus_SH205939.07FU(0.0600)	Sporobolomyces	13	Pathotroph-Saprotroph	Fungal Parasite-Litter Saprotroph	Yeast	NULL	Probable	NULL	b'Tedersoo L, et al. 2014. Science 346:1256688; Nagy GL, et al. 2014. Nature Communications 5:4471; Purahong W, et al. 2016. Molecular Ecology 25:4059-4074'
Zotu1405	d:Fungi(1.0000),p:Ascomycota(1.0000),c:Leotiomycetes(0.9200),o:Helotiales(0.8100),f:Dermateaceae(0.3900),g:Calloria(0.3900),s:Calloria_urticae_SH529064.07FU(0.3900)	-	-	-	-	-	-	-	Unassigned	-
Zotu1406	d:Fungi(1.0000),p:Ascomycota(0.9100),c:Dothideomycetes(0.8800),o:Pleosporales(0.8700),f:Phaeosphaeriaceae(0.6400),g:Paraphoma(0.5100),s:Paraphoma_dioscoreae_SH208744.07FU(0.4800)	-	-	-	-	-	-	-	Unassigned	-
Zotu1407	d:Fungi(1.0000),p:Basidiomycota(1.0000),c:Microbotryomycetes(1.0000),o:Sporidiobolales(1.0000),f:Sporidiobolaceae(1.0000),g:Rhodotorula(1.0000),s:Rhodotorula_nothofagi_SH213407.07FU(1.0000)	Rhodotorula	13	Pathotroph-Saprotroph	Animal Endosymbiont-Animal Pathogen-Endophyte-Plant Pathogen-Undefined Saprotroph	Yeast	NULL	Probable	Opportunistic human pathogen	b'http://www.cdc.gov'
Zotu1408	d:Fungi(1.0000),p:Ascomycota(0.9600),c:Sordariomycetes(0.9500)	-	-	-	-	-	-	-	Unassigned	-
Zotu1409	d:Fungi(1.0000),p:Basidiomycota(1.0000),c:Agaricomycetes(1.0000),o:Agaricales(1.0000),f:Tricholomataceae(0.9800),g:Mycena(0.9300),s:Mycena_metata_SH220724.07FU(0.7300)	Mycena	13	Pathotroph-Saprotroph	Leaf Saprotroph-Plant Pathogen-Undefined Saprotroph-Wood Saprotroph	Agaricoid	NULL	Probable	NULL	b'Grgurinovic CA, Simpson JA. 2001. Fungal Diversity 8:97-127; Tedersoo L, et al. 2014. Science 346:1256688; http://www.apsnet.org/publications/commonnames/Pages/default.aspx'
Zotu141	d:Fungi(1.0000),p:Basidiomycota(1.0000),c:Agaricomycetes(0.9900),o:Cantharellales(0.9900),f:Ceratobasidiaceae(0.9900),g:Ceratobasidium(0.2900)	-	-	-	-	-	-	-	Unassigned	-
Zotu1410	d:Fungi(1.0000),p:Basidiomycota(0.9500),c:Tremellomycetes(0.9500),o:Tremellales(0.9500),f:Bulleribasidiaceae(0.8800),g:Dioszegia(0.8800),s:Dioszegia_xingshanensis_SH024110.07FU(0.4800)	Dioszegia	13	Saprotroph	Undefined Saprotroph	Yeast	NULL	Probable	The Dioszegia subclade sensu Inacio (Inacio et al. 20015) is characterized by orange-yellow or orange to deep orange colonies. Isolated from plant leaves and soil.	b'Takashima M, et al. 2011 International Journal of Systematic and Evolutionary Microbiology 61:1736-1739'
Zotu1411	d:Fungi(1.0000),p:Ascomycota(1.0000),c:Dothideomycetes(1.0000),o:Capnodiales(0.9300),f:Mycosphaerellaceae(0.9300)	-	-	-	-	-	-	-	Unassigned	-
Zotu1412	d:Fungi(1.0000),p:Ascomycota(1.0000),c:Sordariomycetes(1.0000),o:Hypocreales(0.9900),f:Nectriaceae(0.6200),g:Fusarium(0.6200),s:Chaetomium_globosum_SH489927.07FU(0.0100)	Chaetomium	13	Pathotroph-Saprotroph-Symbiotroph	Animal Pathogen-Dung Saprotroph-Endophyte-Epiphyte-Plant Saprotroph-Wood Saprotroph	Microfungus	Soft Rot	Possible	Saprobic, acting as key decay organisms of plant materials and plant-derived commodities (Cannon & Kirk 2007); Epiphyte detection method-culture (Massimo et al. 2015); Endophyte detection method-culture (Busby et al. 2016, David et al. 2016); Likely opportunistic human pathogen (Irinyi et al. 2015)	b'Seehann G, et al. 1975. List of Fungi in Soft-Rot Tissue Tests. Institute fur Holzbiologie und Holzschutz, Bundesforschungsanstalt fur Forst - und Holzwirtshaft, Hamburg - Lohbrugge, Germany; Cannon PF, Kirk PM. 2007. Fungal Families of the World. CAB International, Cambridge; Bills GF, et al. 2013. Current Opinion in microbiology, 16:549-565; Tedersoo L, et al. 2014. Science 346:1256688; Iriny…
Zotu1413	d:Fungi(1.0000),p:Ascomycota(0.9900),c:Dothideomycetes(0.8700),o:Pleosporales(0.8000),f:Lophiostomataceae(0.2100),g:Lophiostoma(0.2100),s:Tetraplosphaeria_yakushimensis_SH028443.07FU(0.0300)	Tetraplosphaeria	13	Saprotroph	Undefined Saprotroph	NULL	NULL	Probable	NULL	b'Tedersoo L, et al. 2014. Science 346:1256688'
Zotu1414	d:Fungi(1.0000),p:Ascomycota(0.9900),c:Leotiomycetes(0.9900),o:Helotiales(0.9900),f:Hyaloscyphaceae(0.9300),g:Lachnum(0.4000),s:Incrucipulum_ciliare_SH196490.07FU(0.0500)	Incrucipulum	13	Saprotroph	Undefined Saprotroph	NULL	NULL	Probable	NULL	b'Tedersoo L, et al. 2014. Science 346:1256688'
Zotu1415	d:Fungi(1.0000),p:Ascomycota(1.0000),c:Sordariomycetes(1.0000),o:Glomerellales(1.0000),f:Glomerellaceae(1.0000),g:Colletotrichum(1.0000),s:Colletotrichum_paspali_SH193176.07FU(0.2100)	Colletotrichum	13	Pathotroph-Symbiotroph	Endophyte-Plant Pathogen	Microfungus	NULL	Probable	NULL	b'Costa IPMW, et al. 2012. Mycotaxon 119:26; Tedersoo L, et al. 2014. Science 346:1256688; http://www.apsnet.org/publications/commonnames/Pages/default.aspx'
Zotu1416	d:Fungi(1.0000),p:Basidiomycota(1.0000),c:Agaricomycetes(1.0000),o:Agaricales(1.0000),f:Psathyrellaceae(1.0000),g:Psathyrella(1.0000),s:Psathyrella_piluliformis_SH220363.07FU(0.9400)	Psathyrella	13	Saprotroph	Wood Saprotroph	Agaricoid	NULL	Probable	NULL	b'Tedersoo L, et al. 2014. Science 346:1256688'
Zotu1417	d:Fungi(1.0000),p:Ascomycota(0.7100),c:Sordariomycetes(0.6500),o:Hypocreales(0.6500),f:Bionectriaceae(0.4100),g:Gliomastix(0.3000),s:Stromatonectria_caraganae_SH192543.07FU(0.0500)	Stromatonectria	13	Saprotroph	Undefined Saprotroph	NULL	NULL	Probable	NULL	b'Tedersoo L, et al. 2014. Science 346:1256688'
Zotu1418	d:Fungi(1.0000),p:Basidiomycota(0.9900),c:Agaricomycetes(0.9900),o:Agaricales(0.9900),f:Psathyrellaceae(0.9400),g:Psathyrella(0.9400),s:Psathyrella_candolleana_SH220347.07FU(0.6800)	Psathyrella	13	Saprotroph	Wood Saprotroph	Agaricoid	NULL	Probable	NULL	b'Tedersoo L, et al. 2014. Science 346:1256688'
Zotu1419	d:Fungi(1.0000),p:Ascomycota(0.9900),c:Dothideomycetes(0.7600),o:Pleosporales(0.7100),f:Didymosphaeriaceae(0.4600),g:Paraconiothyrium(0.4200),s:Paraconiothyrium_hawaiiense_SH186963.07FU(0.1100)	Paraconiothyrium	13	Saprotroph	Undefined Saprotroph	NULL	NULL	Probable	NULL	b'Tedersoo L, et al. 2014. Science 346:1256688'
Zotu142	d:Fungi(1.0000),p:Ascomycota(1.0000),c:Dothideomycetes(0.0800),o:Capnodiales(0.0300),f:Mycosphaerellaceae(0.0300),g:Ramularia(0.0300),s:Ramularia_armoraciae_SH206862.07FU(0.0200)	Ramularia	13	Pathotroph	Plant Pathogen	Microfungus	NULL	Probable	NULL	b'Tedersoo L, et al. 2014. Science 346:1256688'
Zotu1420	d:Fungi(1.0000),p:Ascomycota(1.0000),c:Sordariomycetes(0.4500),o:Diaporthales(0.4500),f:Diaporthaceae(0.2600),g:Diaporthe(0.2600),s:Diaporthe_convolvuli_SH495082.07FU(0.0500)	Diaporthe	13	Pathotroph-Symbiotroph	Endophyte-Plant Pathogen	Microfungus	NULL	Possible	NULL	b'Tedersoo L, et al. 2014. Science 346:1256688'
Zotu1421	d:Fungi(1.0000),p:Ascomycota(1.0000),c:Eurotiomycetes(1.0000),o:Eurotiales(1.0000),f:Aspergillaceae(0.9400),g:Aspergillus(0.5400),s:Aspergillus_penicillioides_SH198034.07FU(0.4900)	Aspergillus	13	Pathotroph-Saprotroph-Symbiotroph	Endophyte-Animal Pathogen-Plant Saprotroph-Soil Saprotroph-Undefined Saprotroph-Wood Saprotroph	Microfungus	NULL	Probable	NULL	b'Seehann G, et al. 1975. List of Fungi in Soft-Rot Tissue Tests. Institute fur Holzbiologie und Holzschutz, Bundesforschungsanstalt fur Forst - und Holzwirtshaft, Hamburg - Lohbrugge, Germany; Tedersoo L, et al. 2014. Science 346:1256688; Irinyi L, et al. 2015. Medical Mycology 53:313-337; Massimo NC, et al. 2015. Microbial Ecology 70:61-76; http://www.apsnet.org/publications/commonnames/Pages/d…
Zotu1422	d:Fungi(1.0000),p:Ascomycota(1.0000),c:Eurotiomycetes(1.0000),o:Chaetothyriales(1.0000),f:Cyphellophoraceae(0.9900),g:Cyphellophora(0.9900),s:Cyphellophora_vermispora_SH105839.07FU(0.4100)	Cyphellophora	13	Pathotroph-Saprotroph	Animal Pathogen-Undefined Saprotroph	Facultative Yeast-Microfungus	NULL	Probable	Consult the current literature for updated names on this group that included the Black Yeasts; Some species are likely opportunistic human pathogen (Irinyi et al. 2015)	b'Tedersoo L, et al. 2014. Science 346:1256688 (doi:10.1126/science.1256688); Irinyi L, et al. 2015. Medical Mycology 53:313-337'
Zotu1423	d:Fungi(1.0000),p:Ascomycota(0.9800),c:Sordariomycetes(0.8600),o:Xylariales(0.2100),f:Xylariales_fam_Incertae_sedis(0.1600),g:Liberomyces(0.1500),s:Liberomyces_macrosporus_SH488425.07FU(0.0800)	-	-	-	-	-	-	-	Unassigned	-
Zotu1424	d:Fungi(1.0000),p:Basidiomycota(0.8200),c:Agaricostilbomycetes(0.7100),o:Agaricostilbomycetes_ord_Incertae_sedis(0.4700),f:Agaricostilbomycetes_fam_Incertae_sedis(0.4700),g:Jianyunia(0.4700),s:Jianyunia_sakaguchii_SH220502.07FU(0.4700)	-	-	-	-	-	-	-	Unassigned	-
Zotu1425	d:Fungi(1.0000),p:Ascomycota(0.7600),c:Sordariomycetes(0.7600),o:Xylariales(0.7600),f:Xylariales_fam_Incertae_sedis(0.1300),g:Castanediella(0.0800),s:Castanediella_couratarii_SH200164.07FU(0.0700)	Castanediella	13	Pathotroph	Plant Pathogen	Micofungus	NULL	Probable	NULL	b'Crous PW, et al. 2015. Persoonia\xe2\x80\xaf34:167-266 (http://doi.org/10.3767/003158515X688433)'
Zotu1426	d:Fungi(1.0000),p:Basidiomycota(1.0000),c:Agaricomycetes(1.0000),o:Agaricales(1.0000),f:Psathyrellaceae(0.9700),g:Psathyrella(0.9700),s:Psathyrella_candolleana_SH220347.07FU(0.8000)	Psathyrella	13	Saprotroph	Wood Saprotroph	Agaricoid	NULL	Probable	NULL	b'Tedersoo L, et al. 2014. Science 346:1256688'
Zotu1427	d:Fungi(1.0000),p:Basidiomycota(1.0000),c:Tremellomycetes(1.0000),o:Tremellales(1.0000),f:Bulleraceae(0.9700),g:Bullera(0.9700),s:Bullera_crocea_SH209709.07FU(0.9700)	Bullera	13	Symbiotroph	Epiphyte	Yeast	NULL	Highly Probable	Foliar, isolated from leaves of Melostomae candidum	b'Nakase T, et al. 2004. Systematic and Applied Microbiology 27:558-564'
Zotu1428	d:Fungi(1.0000),p:Ascomycota(0.9900),c:Dothideomycetes(0.9900),o:Botryosphaeriales(0.9900)	-	-	-	-	-	-	-	Unassigned	-
Zotu1429	d:Fungi(1.0000),p:Ascomycota(1.0000),c:Dothideomycetes(0.9900),o:Pleosporales(0.9900),f:Lophiostomataceae(0.7500),g:Lophiostoma(0.6900),s:Lophiotrema_eburnoides_SH216772.07FU(0.0500)	Lophiotrema	13	Saprotroph	Undefined Saprotroph	NULL	NULL	Probable	NULL	b'Tedersoo L, et al. 2014. Science 346:1256688'
Zotu143	d:Fungi(1.0000),p:Basidiomycota(1.0000),c:Pucciniomycetes(1.0000),o:Pucciniales(1.0000),f:Cronartiaceae(0.9800),g:Cronartium(0.5500),s:Cronartium_strobilinum_SH176018.07FU(0.2400)	Cronartium	13	Pathotroph	Plant Pathogen	Microfungus	NULL	Highly Probable	Common Name - Blister Rust, Rust Fungus	b'Tedersoo L, et al. 2014. Science 346:1256688'
Zotu1430	d:Fungi(0.9900),p:Ascomycota(0.9600),c:Dothideomycetes(0.8200),o:Venturiales(0.6800),f:Sympoventuriaceae(0.4500),g:Ochroconis(0.1600),s:Fusicladium_africanum_SH215112.07FU(0.0900)	Fusicladium	13	Pathotroph	Plant Pathogen	NULL	NULL	Probable	NULL	b'Tedersoo L, et al. 2014. Science 346:1256688'
Zotu1431	d:Fungi(1.0000),p:Basidiomycota(1.0000),c:Agaricomycetes(1.0000),o:Agaricales(1.0000),f:Entolomataceae(1.0000),g:Entoloma(1.0000),s:Entoloma_infula_SH221925.07FU(0.7000)	Entoloma	13	Pathotroph-Saprotroph-Symbiotroph	Ectomycorrhizal-Fungal Parasite-Soil Saprotroph-Undefined Saprotroph	Agaricoid	NULL	Possible	NULL	b'Rinaldi AC, et al. 2008. Fungal Diversity 33:1-45 (ECM/(not ECM); Tedersoo L, et al. 2010. Mycorrhiza 20:217-263 (sensu stricto); http://mycorrhizas.info/ecmf.html (ECM/(not ECM)'
Zotu1432	d:Fungi(1.0000),p:Ascomycota(1.0000),c:Sordariomycetes(1.0000),o:Hypocreales(0.8100),f:Nectriaceae(0.8000),g:Fusarium(0.7700),s:Fusarium_keratoplasticum_SH205225.07FU(0.4600)	Fusarium	13	Pathotroph-Saprotroph-Symbiotroph	Animal Pathogen-Endophyte-Lichen Parasite-Plant Pathogen-Soil Saprotroph-Wood Saprotroph	Microfungus	NULL	Possible	Likely opportunistic human pathogen (Irinyi et al. 2015)	b'Duncan CG, Eslyn WE. 1966. Mycologia 58:642-664; Seehann G, et al. 1975. List of Fungi in Soft-Rot Tissue Tests. Institute fur Holzbiologie und Holzschutz, Bundesforschungsanstalt fur Forst - und Holzwirtshaft, Hamburg - Lohbrugge, Germany; Costa IPMW, et al. 2012. Mycotaxon 119:26; Tedersoo L, et al. 2014. Science 346:1256688; Irinyi L, et al. 2015. Medical Mycology 53:313-337; Schroers et al.…
Zotu1433	d:Fungi(1.0000),p:Ascomycota(1.0000),c:Dothideomycetes(0.5000),o:Tubeufiales(0.5000),f:Tubeufiaceae(0.5000),g:Helicoma(0.4900),s:Helicoma_isiola_SH015973.07FU(0.3100)	Helicoma	13	Saprotroph	Undefined Saprotroph	NULL	NULL	Probable	NULL	b'Tedersoo L, et al. 2014. Science 346:1256688'
Zotu1434	d:Fungi(1.0000),p:Ascomycota(1.0000),c:Dothideomycetes(1.0000),o:Capnodiales(0.3200),f:Cladosporiaceae(0.2900),g:Toxicocladosporium(0.2300),s:Toxicocladosporium_rubrigenum_SH202299.07FU(0.1500)	Toxicocladosporium	13	Pathotroph-Symbiotroph	Endophyte-Plant Pathogen	Microfungus	NULL	Probable	Isolated from leaves of Posoqueria and Eucalyptus camaldulensis (occurring within a single small lesion) as well as moldy paint	b'Crous PW, et al. 2009. Persoonia 22:83-94'
Zotu1435	d:Fungi(1.0000),p:Basidiomycota(1.0000),c:Microbotryomycetes(1.0000),o:Sporidiobolales(1.0000),f:Sporidiobolaceae(1.0000),g:Sporobolomyces(1.0000)	-	-	-	-	-	-	-	Unassigned	-
Zotu1436	d:Fungi(1.0000),p:Ascomycota(0.5900),c:Dothideomycetes(0.5900),o:Pleosporales(0.0100)	-	-	-	-	-	-	-	Unassigned	-
Zotu1437	d:Fungi(1.0000),p:Basidiomycota(0.8400),c:Cystobasidiomycetes(0.4700),o:Erythrobasidiales(0.2300),f:Cystobasidiomycetes_fam_Incertae_sedis(0.2000),g:Symmetrospora(0.1800),s:Symmetrospora_foliicola_SH207117.07FU(0.0500)	-	-	-	-	-	-	-	Unassigned	-
Zotu1438	d:Fungi(1.0000),p:Ascomycota(0.1100),c:Dothideomycetes(0.1100),o:Dothideales(0.1000),f:Dothideaceae(0.0200),g:Rhizosphaera(0.0200),s:Rhizosphaera_kalkhoffii_SH206397.07FU(0.0200)	Rhizosphaera	13	Pathotroph	Plant Pathogen	NULL	NULL	Probable	NULL	b'Tedersoo L, et al. 2014. Science 346:1256688'
Zotu1439	d:Fungi(1.0000),p:Ascomycota(0.8000),c:Sordariomycetes(0.8000),o:Hypocreales(0.8000),f:Hypocreaceae(0.8000),g:Trichoderma(0.7900),s:Trichoderma_pubescens_SH085192.07FU(0.7800)	Trichoderma	13	Pathotroph-Saprotroph-Symbiotroph	Endophyte-Epiphyt-Fungal Parasite-Plant Pathogen-Wood Saprotroph	Microfungus	NULL	Possible	Cause of soft-rot (Seehann et al. 1975)	b'Seehann G, et al. 1975. List of Fungi in Soft-Rot Tissue Tests. Institute fur Holzbiologie und Holzschutz, Bundesforschungsanstalt fur Forst - und Holzwirtshaft, Hamburg - Lohbrugge, Germany; Andrews JH, et al. 1983. Phytopathology 73:228-234; Hanada RE, et al. 2010. Fungal Biology 114:901-910; Costa IPMW, et al. 2012. Mycotaxon 119:26; Tedersoo L, et al. 2014. Science 346:1256688; http://www.a…
Zotu144	d:Fungi(1.0000),p:Ascomycota(1.0000),c:Dothideomycetes(0.8200),o:Capnodiales(0.8200),f:Mycosphaerellaceae(0.7500),g:Mycosphaerella(0.7500)	-	-	-	-	-	-	-	Unassigned	-
Zotu1440	d:Fungi(1.0000),p:Basidiomycota(0.8100),c:Agaricostilbomycetes(0.7200),o:Agaricostilbomycetes_ord_Incertae_sedis(0.4700),f:Agaricostilbomycetes_fam_Incertae_sedis(0.4700),g:Jianyunia(0.4700),s:Jianyunia_sakaguchii_SH220502.07FU(0.4700)	-	-	-	-	-	-	-	Unassigned	-
Zotu1441	d:Fungi(1.0000),p:Basidiomycota(0.9900),c:Agaricomycetes(0.9900),o:Agaricales(0.9400),f:Entolomataceae(0.7200),g:Entoloma(0.6300),s:Entocybe_nitida_SH187111.07FU(0.0700)	Entocybe	13	Saprotroph	Undefined Saprotroph	NULL	NULL	Probable	NULL	b'Tedersoo L, et al. 2014. Science 346:1256688'
Zotu1442	d:Fungi(1.0000),p:Ascomycota(1.0000),c:Dothideomycetes(1.0000),o:Capnodiales(1.0000),f:Teratosphaeriaceae(1.0000),g:Penidiella(1.0000),s:Penidiella_aggregata_SH025638.07FU(0.0100)	Penidiella	13	Pathotroph	Plant Pathogen	NULL	NULL	Probable	NULL	b'Tedersoo L, et al. 2014. Science 346:1256688'
Zotu1443	d:Fungi(1.0000),p:Ascomycota(0.9900),c:Sordariomycetes(0.9900),o:Xylariales(0.9800),f:Xylariaceae(0.1700),g:Annulohypoxylon(0.0800),s:Hypoxylon_erythrostroma_SH212715.07FU(0.0400)	Hypoxylon	13	Saprotroph	Undefined Saprotroph	NULL	NULL	Probable	NULL	b'Tedersoo L, et al. 2014. Science 346:1256688'
Zotu1444	d:Fungi(1.0000),p:Basidiomycota(1.0000),c:Agaricomycetes(1.0000),o:Polyporales(1.0000),f:Polyporaceae(1.0000),g:Trichaptum(1.0000),s:Trichaptum_biforme_SH178781.07FU(1.0000)	Trichaptum	13	Saprotroph	Wood Saprotroph	Polyporoid	White Rot	Highly Probable	NULL	b'Gilbertson RL, Ryvarden L. 1987-1987. North American Polypores. Fungiflora, Oslo'
Zotu1445	d:Fungi(1.0000)	-	-	-	-	-	-	-	Unassigned	-
Zotu1446	d:Fungi(1.0000),p:Ascomycota(1.0000),c:Sordariomycetes(1.0000),o:Xylariales(0.9800),f:Sporocadaceae(0.3900),g:Seiridium(0.1900),s:Seimatosporium_discosioides_SH206672.07FU(0.1000)	Seimatosporium	13	Pathotroph	Plant Pathogen	Microfungus	NULL	Probable	Some species causing leaf spot disease (www.apsnet.org)	b'Tedersoo L, et al. 2014. Science 346:1256688; http://www.apsnet.org/publications/commonnames/Pages/default.aspx'
Zotu1447	d:Fungi(1.0000),p:Ascomycota(1.0000),c:Dothideomycetes(1.0000),o:Pleosporales(1.0000),f:Massariaceae(1.0000),g:Massaria(1.0000),s:Massaria_parva_SH463804.07FU(1.0000)	Massaria	13	Saprotroph	Undefined Saprotroph	NULL	NULL	Probable	NULL	b'Tedersoo L, et al. 2014. Science 346:1256688'
Zotu1448	d:Fungi(1.0000),p:Basidiomycota(0.9700),c:Agaricomycetes(0.9700),o:Russulales(0.7900),f:Peniophoraceae(0.1200),g:Peniophora(0.0800),s:Peniophora_aurantiaca_SH188974.07FU(0.0600)	Peniophora	13	Pathotroph-Saprotroph	Plant Pathogen-Wood Saprotroph	Corticioid	White Rot	Probable	NULL	b'Tedersoo L, et al. 2014. Science 346:1256688'
Zotu1449	d:Fungi(1.0000),p:Ascomycota(0.9900),c:Lecanoromycetes(0.9900),o:Lecanorales(0.9500),f:Parmeliaceae(0.9500),g:Flavoparmelia(0.4400),s:Flavoparmelia_subcapitata_SH193647.07FU(0.4300)	Flavoparmelia	13	Symbiotroph	Lichenized	Thallus	NULL	Highly Probable	NULL	b'Esslinger TL. 2014. North Dakota State University (http://www.ndsu.edu/pubweb/~esslinge/chcklst/chcklst7.htm)'
Zotu145	d:Fungi(1.0000),p:Ascomycota(0.9900),c:Dothideomycetes(0.5600),o:Capnodiales(0.4800),f:Teratosphaeriaceae(0.1400),g:Mycosphaerella(0.0800),s:Eupenidiella_venezuelensis_SH214173.07FU(0.0700)	Eupenidiella	13	Pathotroph	Animal Pathogen	Microfungus	NULL	Possible	Pathogenic to humans	b'Quaedvlieg W, et al. 2014. Persoonia\xe2\x80\xaf33:1-40 (http://doi.org/10.3767/003158514X681981)'
Zotu1450	d:Fungi(1.0000),p:Basidiomycota(1.0000),c:Ustilaginomycetes(1.0000),o:Ustilaginales(1.0000),f:Ustilaginaceae(1.0000),g:Moesziomyces(1.0000),s:Moesziomyces_aphidis_SH209530.07FU(0.9800)	Moesziomyces	13	Pathotroph	Plant Pathogen	Facultative Yeast	NULL	Probable	NULL	b'Tedersoo L, et al. 2014. Science 346:1256688'
Zotu1451	d:Fungi(1.0000),p:Ascomycota(0.9100),c:Dothideomycetes(0.7600),o:Myriangiales(0.6500),f:Elsinoaceae(0.4900),g:Sphaceloma(0.0900),s:Sphaceloma_tectificae_SH013191.07FU(0.0400)	Sphaceloma	13	Pathotroph	Plant Pathogen	NULL	NULL	Probable	NULL	b'Tedersoo L, et al. 2014. Science 346:1256688'
Zotu1452	d:Fungi(1.0000),p:Ascomycota(1.0000),c:Leotiomycetes(1.0000),o:Helotiales(1.0000),f:Hyaloscyphaceae(0.8500),g:Lachnum(0.3800),s:Lachnellula_calyciformis_SH201617.07FU(0.0100)	Lachnellula	13	Saprotroph	Undefined Saprotroph	NULL	NULL	Probable	NULL	b'Tedersoo L, et al. 2014. Science 346:1256688'
Zotu1453	d:Fungi(1.0000),p:Ascomycota(1.0000),c:Sordariomycetes(1.0000),o:Glomerellales(1.0000),f:Glomerellaceae(0.9700),g:Colletotrichum(0.9700),s:Colletotrichum_gloeosporioides_SH207321.07FU(0.3700)	Colletotrichum	13	Pathotroph-Symbiotroph	Endophyte-Plant Pathogen	Microfungus	NULL	Probable	NULL	b'Costa IPMW, et al. 2012. Mycotaxon 119:26; Tedersoo L, et al. 2014. Science 346:1256688; http://www.apsnet.org/publications/commonnames/Pages/default.aspx'
Zotu1454	d:Fungi(1.0000),p:Basidiomycota(1.0000),c:Agaricomycetes(1.0000),o:Cantharellales(0.0300)	-	-	-	-	-	-	-	Unassigned	-
Zotu1455	d:Fungi(1.0000),p:Basidiomycota(1.0000),c:Agaricomycetes(1.0000),o:Corticiales(0.9800),f:Corticiaceae(0.9800),g:Limonomyces(0.9800),s:Junghuhnia_rhinocephala_SH196323.07FU(0.0100)	Junghuhnia	13	Saprotroph	Wood Saprotroph	Corticioid	White Rot	Highly Probable	NULL	b'Gilbertson RL, Ryvarden L. 1987-1987. North American Polypores. Fungiflora, Oslo'
Zotu1456	d:Fungi(1.0000),p:Ascomycota(1.0000),c:Sordariomycetes(1.0000),o:Diaporthales(1.0000),f:Diaporthaceae(0.3400),g:Diaporthe(0.3300),s:Diaporthe_convolvuli_SH495082.07FU(0.0200)	Diaporthe	13	Pathotroph-Symbiotroph	Endophyte-Plant Pathogen	Microfungus	NULL	Possible	NULL	b'Tedersoo L, et al. 2014. Science 346:1256688'
Zotu1457	d:Fungi(1.0000),p:Ascomycota(0.8100),c:Dothideomycetes(0.8100),o:Pleosporales(0.8100),f:Pleosporaceae(0.8000),g:Curvularia(0.6200),s:Curvularia_intermedia_SH187570.07FU(0.4600)	Curvularia	13	Pathotroph	Plant Pathogen	NULL	NULL	Probable	NULL	b'Tedersoo L, et al. 2014. Science 346:1256688'
Zotu1458	d:Fungi(1.0000),p:Basidiomycota(0.9200),c:Tremellomycetes(0.9200),o:Tremellales(0.9200),f:Tremellaceae(0.3600),g:Cryptococcus(0.3600),s:Phaeotremella_skinneri_SH181985.07FU(0.1500)	-	-	-	-	-	-	-	Unassigned	-
Zotu1459	d:Fungi(1.0000),p:Ascomycota(0.8600),c:Dothideomycetes(0.0600)	-	-	-	-	-	-	-	Unassigned	-
Zotu146	d:Fungi(1.0000),p:Ascomycota(1.0000),c:Sordariomycetes(1.0000),o:Hypocreales(1.0000),f:Hypocreales_fam_Incertae_sedis(0.0600),g:Acremonium(0.0600),s:Dialonectria_ullevolea_SH207581.07FU(0.0100)	Dialonectria	13	Pathotroph	Fungal Parasite	NULL	NULL	Probable	NULL	b'Tedersoo L, et al. 2014. Science 346:1256688'
Zotu1460	d:Fungi(1.0000),p:Ascomycota(0.7900),c:Dothideomycetes(0.6800),o:Myriangiales(0.6500),f:Myriangiales_fam_Incertae_sedis(0.0700),g:Endosporium(0.0700),s:Erysiphe_carpinicola_SH217848.07FU(0.0100)	Erysiphe	13	Pathotroph	Plant Pathogen	Microfungus	NULL	Probable	NULL	b'Tedersoo L, et al. 2014. Science 346:1256688'
Zotu1461	d:Fungi(1.0000),p:Ascomycota(1.0000),c:Dothideomycetes(1.0000),o:Capnodiales(1.0000),f:Mycosphaerellaceae(0.9300),g:Pseudocercosporella(0.1200),s:Davidiella_rosigena_SH016560.07FU(0.0600)	Davidiella	13	Saprotroph	Undefined Saprotroph	Microfungus	NULL	Probable	NULL	b'Tedersoo L, et al. 2014. Science 346:1256688'
Zotu1462	d:Fungi(1.0000),p:Basidiomycota(0.3100),c:Tremellomycetes(0.3100),o:Filobasidiales(0.2800),f:Filobasidiaceae(0.2800),g:Naganishia(0.2800),s:Naganishia_randhawae_SH116217.07FU(0.2000)	-	-	-	-	-	-	-	Unassigned	-
Zotu1463	d:Fungi(1.0000),p:Basidiomycota(1.0000),c:Agaricomycetes(1.0000),o:Russulales(1.0000),f:Peniophoraceae(1.0000),g:Peniophora(0.9900),s:Peniophora_albobadia_SH188975.07FU(0.9900)	Peniophora	13	Pathotroph-Saprotroph	Plant Pathogen-Wood Saprotroph	Corticioid	White Rot	Probable	NULL	b'Tedersoo L, et al. 2014. Science 346:1256688'
Zotu1464	d:Fungi(1.0000),p:Ascomycota(0.1200),c:Dothideomycetes(0.1200),o:Dothideales(0.1200),f:Dothideaceae(0.0500),g:Rhizosphaera(0.0500),s:Rhizosphaera_kalkhoffii_SH206397.07FU(0.0500)	Rhizosphaera	13	Pathotroph	Plant Pathogen	NULL	NULL	Probable	NULL	b'Tedersoo L, et al. 2014. Science 346:1256688'
Zotu1465	d:Fungi(1.0000),p:Ascomycota(1.0000),c:Dothideomycetes(0.8200),o:Pleosporales(0.7800),f:Phaeosphaeriaceae(0.4100),g:Sclerostagonospora(0.4000),s:Sclerostagonospora_cycadis_SH207008.07FU(0.4000)	Sclerostagonospora	13	Saprotroph	Undefined Saprotroph	NULL	NULL	Probable	NULL	b'Tedersoo L, et al. 2014. Science 346:1256688'
Zotu1466	d:Fungi(1.0000),p:Ascomycota(1.0000),c:Sordariomycetes(0.8700),o:Diaporthales(0.8700),f:Diaporthaceae(0.4100),g:Diaporthe(0.4100),s:Phomopsis_liquidambaris_SH185552.07FU(0.2400)	Phomopsis	13	Pathotroph-Saprotroph-Symbiotroph	Endophyte-Plant Pathogen-Wood Saprotroph	Microfungus	Soft Rot fungus (Seehann et al. 1975)	Probable	NULL	b'Seehann G, et al. 1975. List of Fungi in Soft-Rot Tissue Tests. Institute fur Holzbiologie und Holzschutz, Bundesforschungsanstalt fur Forst - und Holzwirtshaft, Hamburg - Lohbrugge, Germany; Costa IPMW, et al. 2012. Mycotaxon 119:26; Tedersoo L, et al. 2014. Science 346:1256688'
Zotu1467	d:Fungi(1.0000),p:Basidiomycota(1.0000),c:Agaricomycetes(1.0000),o:Polyporales(1.0000),f:Polyporaceae(1.0000),g:Trichaptum(1.0000),s:Trichaptum_fuscoviolaceum_SH523110.07FU(0.9000)	Trichaptum	13	Saprotroph	Wood Saprotroph	Polyporoid	White Rot	Highly Probable	NULL	b'Gilbertson RL, Ryvarden L. 1987-1987. North American Polypores. Fungiflora, Oslo'
Zotu1468	d:Fungi(1.0000),p:Ascomycota(0.9400),c:Sordariomycetes(0.8200),o:Microascales(0.7900)	-	-	-	-	-	-	-	Unassigned	-
Zotu1469	d:Fungi(1.0000),p:Ascomycota(0.9300),c:Dothideomycetes(0.9000),o:Pleosporales(0.9000),f:Pleosporaceae(0.9000),g:Alternaria(0.7500),s:Alternaria_oregonensis_SH628739.07FU(0.3000)	Alternaria	13	Pathotroph-Saprotroph-Symbiotroph	Animal Pathogen-Endophyte-Plant Pathogen-Wood Saprotroph	Microfungus	Soft Rot	Possible	NULL	b'Duncan CG, Eslyn WE. 1966. Mycologia 58:642-664; Seehann G, et al. 1975. List of Fungi in Soft-Rot Tissue Tests. Institute fur Holzbiologie und Holzschutz, Bundesforschungsanstalt fur Forst - und Holzwirtshaft, Hamburg - Lohbrugge, Germany; Tedersoo L, et al. 2014. Science 346:125688'
Zotu147	d:Fungi(1.0000),p:Ascomycota(1.0000),c:Dothideomycetes(1.0000),o:Myriangiales(1.0000),f:Elsinoaceae(1.0000)	-	-	-	-	-	-	-	Unassigned	-
Zotu1470	d:Fungi(1.0000),p:Ascomycota(1.0000),c:Eurotiomycetes(1.0000),o:Chaetothyriales(1.0000),f:Herpotrichiellaceae(1.0000),g:Phialophora(1.0000),s:Phialophora_livistonae_SH213231.07FU(1.0000)	Phialophora	13	Pathotroph-Saprotroph-Symbiotroph	Animal Pathogen-Endophyte-Ericoid Mycorrhizal-Plant Pathogen-Wood Saprotroph	Facultative Yeast-Microfungus	NULL	Possible	Consult the current literature for updated names on this paraphyletic grouping that included the Black Yeasts, Dark Septate Endophytes, etc.	b'Nilsson T. 1973. Studies on wood degradation and cellulolytic activity of microfungi. No. 104; de Hoog GS, et al. 2000. Mycoses 43:409-416; Rinaldi AC, et al. 2008. Fungal Diversity 33:1-45; Newsham 2011. New Phytologist 190:783-793 (as DSE); Irinyi L, et al. 2015. Medical Mycology 53:313-337; http://www.apsnet.org/publications/commonnames/Pages/default.aspx'
Zotu1471	d:Fungi(1.0000),p:Basidiomycota(1.0000),c:Agaricomycetes(1.0000),o:Agaricales(1.0000),f:Pluteaceae(1.0000),g:Pluteus(1.0000),s:Pluteus_podospileus_SH178476.07FU(0.9800)	Pluteus	13	Pathotroph-Saprotroph	Bryophyte Parasite-Litter Saprotroph-Wood Saprotroph	Agaricoid	White Rot	Probable	NULL	b'Grgurinovic CA, Simpson JA. 2001. Fungal Diversity 8:97-127; James TY, et al. 2006. Nature 443:818-822; Tedersoo L, et al. 2014. Science 346:1256688'
Zotu1472	d:Fungi(1.0000),p:Ascomycota(1.0000),c:Dothideomycetes(0.9600),o:Pleosporales(0.9600),f:Pleosporaceae(0.1400),g:Alternaria(0.0700),s:Alternaria_cinerariae_SH216796.07FU(0.0400)	Alternaria	13	Pathotroph-Saprotroph-Symbiotroph	Animal Pathogen-Endophyte-Plant Pathogen-Wood Saprotroph	Microfungus	Soft Rot	Possible	NULL	b'Duncan CG, Eslyn WE. 1966. Mycologia 58:642-664; Seehann G, et al. 1975. List of Fungi in Soft-Rot Tissue Tests. Institute fur Holzbiologie und Holzschutz, Bundesforschungsanstalt fur Forst - und Holzwirtshaft, Hamburg - Lohbrugge, Germany; Tedersoo L, et al. 2014. Science 346:125688'
Zotu1473	d:Fungi(1.0000),p:Basidiomycota(0.9900),c:Agaricomycetes(0.9900),o:Polyporales(0.9900),f:Phanerochaetaceae(0.9100),g:Bjerkandera(0.9100),s:Bjerkandera_adusta_SH630174.07FU(0.8600)	Bjerkandera	13	Saprotroph	Wood Saprotroph	Polyporoid	White Rot	Highly Probable	NULL	b'Gilbertson RL, Ryvarden L. 1987-1987. North American Polypores. Fungiflora, Oslo'
Zotu1474	d:Fungi(1.0000),p:Ascomycota(1.0000),c:Sordariomycetes(1.0000),o:Diaporthales(1.0000),f:Diaporthaceae(0.9800),g:Diaporthe(0.9800),s:Diaporthe_amygdali_SH192474.07FU(0.8900)	Diaporthe	13	Pathotroph-Symbiotroph	Endophyte-Plant Pathogen	Microfungus	NULL	Possible	NULL	b'Tedersoo L, et al. 2014. Science 346:1256688'
Zotu1475	d:Fungi(1.0000),p:Ascomycota(0.8900),c:Dothideomycetes(0.2600),o:Myriangiales(0.2300),f:Myriangiales_fam_Incertae_sedis(0.0900),g:Endosporium(0.0900),s:Aspergillus_varians_SH186291.07FU(0.0100)	Aspergillus	13	Pathotroph-Saprotroph-Symbiotroph	Endophyte-Animal Pathogen-Plant Saprotroph-Soil Saprotroph-Undefined Saprotroph-Wood Saprotroph	Microfungus	NULL	Probable	NULL	b'Seehann G, et al. 1975. List of Fungi in Soft-Rot Tissue Tests. Institute fur Holzbiologie und Holzschutz, Bundesforschungsanstalt fur Forst - und Holzwirtshaft, Hamburg - Lohbrugge, Germany; Tedersoo L, et al. 2014. Science 346:1256688; Irinyi L, et al. 2015. Medical Mycology 53:313-337; Massimo NC, et al. 2015. Microbial Ecology 70:61-76; http://www.apsnet.org/publications/commonnames/Pages/d…
Zotu1476	d:Fungi(1.0000),p:Ascomycota(1.0000),c:Eurotiomycetes(1.0000),o:Chaetothyriales(0.8900),f:Phaeomoniellales_fam_Incertae_sedis(0.0500),g:Pseudophaeomoniella(0.0400),s:Pseudophaeomoniella_oleicola_SH631240.07FU(0.0200)	-	-	-	-	-	-	-	Unassigned	-
Zotu1477	d:Fungi(1.0000),p:Ascomycota(0.7000),c:Dothideomycetes(0.6600),o:Capnodiales(0.4000),f:Dothideomycetes_fam_Incertae_sedis(0.0700),g:Incertomyces(0.0500),s:Incertomyces_vagans_SH192622.07FU(0.0500)	-	-	-	-	-	-	-	Unassigned	-
Zotu1478	d:Fungi(1.0000),p:Ascomycota(1.0000),c:Sordariomycetes(0.9600),o:Sordariales(0.9600),f:Chaetomiaceae(0.9200),g:Chaetomium(0.7600),s:Chaetomium_carinthiacum_SH195327.07FU(0.2600)	Chaetomium	13	Pathotroph-Saprotroph-Symbiotroph	Animal Pathogen-Dung Saprotroph-Endophyte-Epiphyte-Plant Saprotroph-Wood Saprotroph	Microfungus	Soft Rot	Possible	Saprobic, acting as key decay organisms of plant materials and plant-derived commodities (Cannon & Kirk 2007); Epiphyte detection method-culture (Massimo et al. 2015); Endophyte detection method-culture (Busby et al. 2016, David et al. 2016); Likely opportunistic human pathogen (Irinyi et al. 2015)	b'Seehann G, et al. 1975. List of Fungi in Soft-Rot Tissue Tests. Institute fur Holzbiologie und Holzschutz, Bundesforschungsanstalt fur Forst - und Holzwirtshaft, Hamburg - Lohbrugge, Germany; Cannon PF, Kirk PM. 2007. Fungal Families of the World. CAB International, Cambridge; Bills GF, et al. 2013. Current Opinion in microbiology, 16:549-565; Tedersoo L, et al. 2014. Science 346:1256688; Iriny…
Zotu1479	d:Fungi(1.0000),p:Ascomycota(0.3900),c:Sordariomycetes(0.3800),o:Microascales(0.3100),f:Halosphaeriaceae(0.2000),g:Acremonium(0.0100),s:Acremonium_charticola_SH211657.07FU(0.0100)	Acremonium	13	Pathogen-Saprotroph-Symbiotroph	Animal Pathogen-Endophyte-Fungal Parasite-Plant Pathogen-Wood Saprotroph	Microfungus	Soft Rot	Possible	Endophyte detection method-culture (Hanada et al. 2010, Del Olmo-Ruiz & Arnold 2014); Likely opportunistic human pathogen (Irinyi et al. 2015)	b'Duncan CG, Eslyn WE. 1966. Mycologia 58:642-64; Nilsson T. 1973. Studies on wood degradation and cellulolytic activity of microfungi. No. 104; Worrall JJ, et al. 1997. Mycologia 89: 199-219; Hanada RE, et al. 2010. Fungal Biology 114:901-910; Del Olmo-Ruiz M, Arnold AE. 2014. Mycologia 106:8-21; Tedersoo L, et al. 2014. Science 346:1256688; Irinyi L, et al. 2015. Medical Mycology 53:313-337'
Zotu148	d:Fungi(1.0000),p:Basidiomycota(1.0000),c:Agaricomycetes(1.0000),o:Corticiales(0.9900),f:Corticiaceae(0.9900),g:Subulicystidium(0.9900),s:Subulicystidium_brachysporum_SH524680.07FU(0.6700)	Subulicystidium	13	Saprotroph	Undefined Saprotroph	Corticioid	White Rot	Probable	NULL	b'Tedersoo L, et al. 2014. Science 346:1256688'
Zotu1480	d:Fungi(1.0000),p:Ascomycota(0.5900),c:Arthoniomycetes(0.2600),o:Lichenostigmatales(0.2600),f:Phaeococcomycetaceae(0.2600),g:Phaeococcomyces(0.2600)	-	-	-	-	-	-	-	Unassigned	-
Zotu1481	d:Fungi(1.0000),p:Ascomycota(1.0000),c:Saccharomycetes(1.0000),o:Saccharomycetales(1.0000),f:Saccharomycetaceae(1.0000),g:Zygosaccharomyces(1.0000),s:Zygosaccharomyces_rouxii_SH185486.07FU(0.0900)	Zygosaccharomyces	13	Pathotroph	Plant Pathogen	Facultative Yeast	NULL	Probable	NULL	b'Kurtzman CP, et al. (eds.) 2011. The Yeasts, a Taxonomic Study. Fifth Edition. Vols 1-3. Elsevier, San Diego; http://www.apsnet.org/publications/commonnames/Pages/default.aspx'
Zotu1482	d:Fungi(1.0000),p:Basidiomycota(1.0000),c:Agaricomycetes(1.0000),o:Russulales(1.0000),f:Stereaceae(1.0000),g:Stereum(0.9800),s:Stereum_hirsutum_SH196433.07FU(0.3100)	Stereum	13	Saprotroph	Undefined Saprotroph	NULL	White Rot	Probable	NULL	b'Tedersoo L, et al. 2014. Science 346:1256688'
Zotu1483	d:Fungi(1.0000),p:Ascomycota(1.0000)	-	-	-	-	-	-	-	Unassigned	-
Zotu1484	d:Fungi(1.0000),p:Basidiomycota(0.6800),c:Agaricostilbomycetes(0.6500),o:Agaricostilbales(0.6400),f:Kondoaceae(0.6300),g:Kondoa(0.6200),s:Kondoa_phyllada_SH197914.07FU(0.0200)	-	-	-	-	-	-	-	Unassigned	-
Zotu1485	d:Fungi(1.0000),p:Basidiomycota(1.0000),c:Agaricomycetes(1.0000),o:Phallales(1.0000),f:Phallaceae(1.0000),g:Phallus(1.0000),s:Phallus_rugulosus_SH220939.07FU(1.0000)	Phallus	13	Saprotroph	Litter Saprotroph-Soil Saprotroph-Wood Saprotroph	Phalloid	NULL	Probable	Common name - stinkhorn; Saprobic, on soil or decaying wood, with spores dispersed by insects that are attracted to the fruit bodies by their distictive foetid smell (Cannon & Kirk 2007)	b'Grgurinovic CA, Simpson JA. 2001. Fungal Diversity 8:97-127; Cannon PF, Kirk PM. 2007. Fungal Families of the World. CAB International, Cambridge; Tedersoo L, et al. 2014. Science 346:1256688'
Zotu1486	d:Fungi(1.0000)	-	-	-	-	-	-	-	Unassigned	-
Zotu1487	d:Fungi(1.0000),p:Basidiomycota(0.6100),c:Agaricomycetes(0.4400),o:Agaricales(0.3700),f:Tricholomataceae(0.1000),g:Candida(0.0900),s:Papiliotrema_laurentii_SH631003.07FU(0.0200)	-	-	-	-	-	-	-	Unassigned	-
Zotu1488	d:Fungi(1.0000),p:Basidiomycota(1.0000),c:Tremellomycetes(1.0000)	-	-	-	-	-	-	-	Unassigned	-
Zotu1489	d:Fungi(1.0000),p:Ascomycota(0.9700),c:Dothideomycetes(0.8800),o:Pleosporales(0.8300),f:Cucurbitariaceae(0.2100),g:Coniothyrium(0.2000),s:Coniothyrium_carteri_SH192125.07FU(0.1800)	Coniothyrium	13	Pathotroph-Saprotroph	Plant Pathogen-Wood Saprotroph	NULL	Soft Rot	Highly Probable	NULL	b'Duncan CG, Eslyn WE. 1966. Mycologia 58:642-664; Nilsson T. 1973. Studies on wood degradation and cellulolytic activity of microfungi. No. 104; Seehann G, et al. 1975. List of Fungi in Soft-Rot Tissue Tests. Institute fur Holzbiologie und Holzschutz, Bundesforschungsanstalt fur Forst - und Holzwirtshaft, Hamburg - Lohbrugge, Germany; http://www.apsnet.org/publications/commonnames/Pages/default.…
Zotu149	d:Fungi(1.0000),p:Ascomycota(0.9800),c:Sordariomycetes(0.9800),o:Xylariales(0.9800),f:Amphisphaeriaceae(0.8000),g:Seimatosporium(0.5200),s:Seimatosporium_discosioides_SH206672.07FU(0.2800)	Seimatosporium	13	Pathotroph	Plant Pathogen	Microfungus	NULL	Probable	Some species causing leaf spot disease (www.apsnet.org)	b'Tedersoo L, et al. 2014. Science 346:1256688; http://www.apsnet.org/publications/commonnames/Pages/default.aspx'
Zotu1490	d:Fungi(1.0000),p:Ascomycota(1.0000),c:Sordariomycetes(1.0000),o:Hypocreales(0.0100),f:Hypocreales_fam_Incertae_sedis(0.0100),g:Cylindrium(0.0100)	Hypocreales	7	Saprotroph	Undefined Saprotroph	Microfungus	NULL	Possible	NULL	b'Sterkenburg E, et al. 2015. New Phytologist 207:1145-1158'
[truncated: 3,322 more rows]
